# Supplementary material for: Lonafarnib improves cardiovascular function and survival in a mouse model of Hutchinson-Gilford progeria syndrome
Source: eLife. 2023 Mar 17;12:e82728. doi: 10.7554/eLife.82728 (PMC10023154; doi:10.7554/eLife.82728)
Supplement: Source data 1. [file elife-82728-data1.xlsx]

## Sheet: DTA
DTA	Structural Properties
	Type	Date	Personnel	Mouse #	Unloaded Configuration			In-vivo Loaded Configuration @ Sys								In-vivo Loaded Configuration @ Fixed								In-vivo Loaded Configuration @ Low fixed								Distensibility					irsys (μm)	irLow fixed (μm)	irFixed (μm)	h*Cttt	PWV - BH	PWV - MK	PWV - MK Fixed
					L (mm)	OD (μm)	H (μm)	Piv (mmHg)	od (μm)	h (μm)	λziv	λϑ	W (kPa)	σz (kPa)	σϑ (kPa)	Piv (mmHg)	od (μm)	h (μm)	λziv	λϑ	W (kPa)	σz (kPa)	σϑ (kPa)	Piv (mmHg)	od (μm)	h (μm)	λziv	λϑ	W (kPa)	σz (kPa)	σϑ (kPa)	Psys (mmHg)	idsys (μm)	Pdia (mmHg)	iddia (μm)	D (mmHg-1)
	P42 - Wt	2020-10-07	SM	WT498	5.24	762.311	106.17	113.321	1210.7	36.2874	1.63465	1.78987	71.6133	242.559	236.923	100	1161.59	37.9262	1.63465	1.71253	62.2142	212.666	190.832	85.1305	1093.61	40.4658	1.63465	1.60506	51.5245	184.272	142.015	113.321	1138.12	85.1305	1012.68	32.9592	569.061	506.339	542.868	43.4565	3.6926	6.17921	5.60108
		2020-10-08	SM	WT503	4.64	720.584	95.5698	113.32	1177.74	33.2722	1.56864	1.83111	73.7108	248.476	252.28	100.001	1134.49	34.6216	1.56864	1.75975	64.6672	213.555	205.102	85.1305	1070.4	36.8427	1.56864	1.65366	53.6271	179.733	153.522	113.32	1111.2	85.1305	996.718	30.5614	555.6	498.359	532.623	45.7645	3.59268	6.41753	5.72856
		2020-10-12	SM	WT519	4.2	729.241	99.6295	113.32	1125.96	36.8855	1.56151	1.72976	60.8938	233.61	215.482	100.001	1085.75	38.3535	1.56151	1.66355	53.3011	206.196	175.376	85.1306	1031.39	40.5422	1.56151	1.57375	44.8088	180.756	133.017	113.32	1052.19	85.1306	950.308	28.5267	526.096	475.154	504.52	43.0347	3.96036	6.39532	5.83228
		2019-03-12	SM	WTM_6W_M1	5.36	813.565	88.7475	113.32	1282.91	32.309	1.59199	1.72541	79.5589	311.061	284.841	100.001	1239.52	33.5035	1.59199	1.66389	70.1985	266.803	233.289	85.1305	1176.75	35.4019	1.59199	1.57466	58.9818	223.866	177.279	113.32	1218.3	85.1305	1105.94	27.031	609.149	552.971	586.256	52.6914	4.96036	6.57648	5.9
		2019-03-13	SM	WTM_6W_M1	5.4	767.962	93.4893	113.32	1147.08	35.9266	1.57956	1.64744	66.4272	275.663	226.078	100.001	1109.13	37.2427	1.57956	1.58922	59.0642	243.373	185.191	85.1306	1053.67	39.3568	1.57956	1.50386	50.151	210.293	140.577	113.32	1075.23	85.1306	974.953	27.3668	537.615	487.476	517.322	46.8212	5.96036	6.59889	5.91021
		mean			4.968	758.733	96.7213	113.32	1188.88	34.9361	1.58727	1.74472	70.4408	262.274	243.121	100.001	1146.09	36.3295	1.58727	1.67779	61.889	228.519	197.958	85.1305	1085.16	38.5219	1.58727	1.5822	51.8186	195.784	149.282	113.32	1119.01	85.1305	1008.12	29.289	559.504	504.06	536.718	46.3537	4.43327	6.43349	5.79443
		SD			0.527181	36.8431	6.57824	0.00026668	61.5388	2.01727	0.0288833	0.0699327	7.11446	31.4647	27.0058	0.000283562	59.3956	2.14379	0.0288833	0.0635688	6.2969	25.7867	22.4892	4.52706e-05	56.0358	2.29735	0.0288833	0.0545324	5.16203	20.0944	17.2838	0.00026668	64.5476	4.52706e-05	59.5029	2.47304	32.2738	29.7514	31.3113	3.87754	1.01102	0.168947	0.130102
		SEM			0.235763	16.4767	2.94188	0.000119263	27.521	0.902152	0.012917	0.0312749	3.18169	14.0714	12.0774	0.000126813	26.5625	0.958733	0.012917	0.0284288	2.81606	11.5322	10.0575	2.02456e-05	25.06	1.02741	0.012917	0.0243876	2.30853	8.98647	7.72955	0.000119263	28.8666	2.02456e-05	26.6105	1.10598	14.4333	13.3052	14.0028	1.73409	0.452143	0.0755552	0.0581833
	P42 -GG	2019-12-18	SM	GG46	5.18	729.246	105.426	90.8358	1093.59	39.3506	1.58533	1.68997	53.1091	181.684	156.167	100.001	1129.86	37.9946	1.58533	1.75028	59.0695	200.185	184.897	63.4135	942.386	46.2953	1.58533	1.43646	34.9892	142.401	77.5934	90.8358	1014.89	63.4135	849.796	53.1375	507.443	424.898	526.933	28.4747	3.56891	5.29689	5.7411
		2019-12-18	SM	GG47	4.6	756.619	97.4839	90.8358	1139.55	38.8508	1.50258	1.66992	48.7317	165.295	165.496	100.001	1174.62	37.6104	1.50258	1.725	54.5607	183.337	194.856	63.4136	995.471	44.9912	1.50258	1.44201	31.1195	126.066	85.0751	90.8358	1061.85	63.4136	905.489	47.2332	530.927	452.744	549.698	31.2095	3.68547	5.4214	5.85824
		2019-12-19	SM	GG50	3.92	664.38	98.3558	90.8358	980.884	39.4106	1.50042	1.66331	42.3156	173.451	138.595	100.001	1015.03	37.9752	1.50042	1.72618	47.9298	188.681	164.843	63.4136	859.525	45.5857	1.50042	1.43799	27.5947	139.096	71.2492	90.8358	902.063	63.4136	768.353	47.5989	451.032	384.177	469.542	25.1509	3.61935	5.2803	5.59502
		2019-12-19	SM	GG60	4.12	711.88	96.5938	90.836	1020.08	39.8027	1.52323	1.5932	41.5904	163.163	143.073	100.001	1053.21	38.4503	1.52323	1.64924	46.9641	177.541	169.26	63.4137	902.845	45.5104	1.52323	1.39339	27.4353	131.269	75.4049	90.836	940.472	63.4137	811.824	43.3445	470.236	405.912	488.152	27.2699	3.75125	5.38479	5.70232
		2020-03-09	SM	GG163	4.38	654.601	86.3877	90.8358	891.903	37.964	1.51414	1.50285	41.0101	161.086	130.145	100.001	929.762	36.2839	1.51414	1.57243	47.5129	177.197	157.482	63.4136	761.937	45.2334	1.51414	1.26133	24.8161	125.718	62.7503	90.8358	815.975	63.4136	671.47	58.864	407.987	335.735	428.597	20.219	3.49332	4.97784	5.28716
		mean			4.44	703.345	96.8495	90.8358	1025.2	39.0757	1.52514	1.62385	45.3514	168.936	146.695	100.001	1060.49	37.6629	1.52514	1.68463	51.2074	185.388	174.268	63.4136	892.433	45.5232	1.52514	1.39424	29.191	132.91	74.4146	90.8358	947.05	63.4136	801.386	50.0356	473.525	400.693	492.584	26.4648	3.62366	5.27224	5.63677
		SD			0.487237	43.2322	6.81447	0.000102119	96.8403	0.707585	0.0348825	0.0768639	5.33423	8.53097	14.1051	2.78436e-05	96.2361	0.826409	0.0348825	0.073325	5.3725	9.52209	15.2685	5.45899e-05	88.5054	0.491742	0.0348825	0.0768849	3.94045	7.57624	8.22813	0.000102119	96.215	5.45899e-05	88.4013	6.04411	48.1075	44.2007	47.6622	4.12119	0.100132	0.174827	0.216909
		SEM			0.217899	19.334	3.04752	4.56689e-05	43.3083	0.316441	0.0155999	0.0343746	2.38554	3.81517	6.30799	1.2452e-05	43.0381	0.369581	0.0155999	0.0327919	2.40266	4.25841	6.82828	2.44134e-05	39.5808	0.219914	0.0155999	0.034384	1.76222	3.3882	3.67973	4.56689e-05	43.0287	2.44134e-05	39.5343	2.70301	21.5143	19.7671	21.3152	1.84305	0.0447803	0.0781851	0.0970048
	P100 - Wt	2017-03-31	SM	P17 F	5.31	723.158	99.1106	126.001	1189.71	31.9329	1.67291	1.85527	81.3046	307.527	296.127	100.001	1108.87	34.4093	1.67291	1.72176	63.0149	246.094	201.486	98.0005	1101.39	34.6586	1.67291	1.70937	61.5854	241.873	194.532	126.001	1125.85	98.0005	1032.07	24.3399	562.923	516.035	520.024	51.6273	4.19397	6.77174	5.69306
		2018-10-16	SM	P157 M	5.61	768.248	105.845	126.001	1304.66	35.8989	1.53934	1.91539	81.9806	256.312	288.45	100	1189.48	39.6106	1.53934	1.7359	59.0504	194.484	186.844	98.0004	1178.9	39.9917	1.53934	1.71936	57.2968	190.557	179.51	126.001	1232.86	98.0004	1098.92	32.6497	616.43	549.459	555.129	48.3354	3.81878	6.26146	5.26559
		2018-10-24	SM	P162 M	5.03	770.06	86.3972	126.001	1184.94	32.4533	1.57923	1.68576	84.2633	283.127	289.876	100.001	1113.8	34.6591	1.57923	1.57847	68.4052	232.867	200.888	98.0005	1106.65	34.8982	1.57923	1.56766	67.0474	229.248	194.092	126.001	1120.04	98.0005	1036.85	21.4915	560.019	518.426	522.243	57.8228	4.2738	7.18511	5.76138
		2019-01-11	SM	P199 M	5.9	794.676	103.831	126.001	1310.2	36.376	1.54805	1.84386	73.3338	260.267	285.727	100.001	1250.76	38.2142	1.54805	1.75517	61.416	210.503	204.849	98.0007	1244.86	38.4073	1.54805	1.74635	60.3996	206.89	198.674	126.001	1237.45	98.0007	1168.05	15.9159	618.723	584.023	587.167	77.07	4.75558	7.89186	6.37253
		2019-01-28	SM	P210 F	4.83	798.964	96.8925	126.001	1314.23	32.8464	1.61624	1.82514	87.8206	289.026	319.266	100.001	1235.24	35.0688	1.61624	1.70948	70.4011	230.404	221.469	98.0005	1227.6	35.3006	1.61624	1.69825	68.9667	226.322	214.113	126.001	1248.53	98.0005	1156.99	21.193	624.266	578.497	582.553	63.4628	4.27905	7.12951	5.84593
		mean			5.336	771.021	98.4154	126.001	1260.75	33.9015	1.59115	1.82508	81.7406	279.251	295.889	100.001	1179.63	36.3924	1.59115	1.70016	64.4575	222.87	203.107	98.0005	1171.88	36.6513	1.59115	1.6882	63.0592	218.978	196.184	126.001	1192.94	98.0005	1098.58	23.118	596.472	549.288	553.423	59.6637	4.26424	7.04794	5.7877
		SD			0.431138	30.1656	7.61209	0.000267824	67.1297	2.07354	0.0547691	0.0848974	5.34441	21.1938	13.6132	0.000115781	66.314	2.36459	0.0547691	0.0701139	4.78223	20.3393	12.3716	0.000108676	66.5289	2.40366	0.0547691	0.0696987	4.8284	20.2328	12.3772	0.000267824	64.1898	0.000108676	64.1719	6.13529	32.0949	32.0859	31.9289	11.3327	0.333578	0.598438	0.396125
		SEM			0.192811	13.4905	3.40423	0.000119775	30.0213	0.927314	0.0244935	0.0379673	2.39009	9.47814	6.08802	5.17787e-05	29.6565	1.05748	0.0244935	0.0313559	2.13868	9.09599	5.53275	4.86015e-05	29.7526	1.07495	0.0244935	0.0311702	2.15933	9.04838	5.53526	0.000119775	28.7065	4.86015e-05	28.6985	2.74379	14.3533	14.3493	14.279	5.06812	0.149181	0.267629	0.177152
	P100 - GG	2017-03-29	SM	P18 F	4.16	645.918	107.27	101.001	987.431	40.3829	1.51083	1.7582	45.4013	193.281	151.161	100.001	983.715	40.5491	1.51083	1.75099	44.7884	191.62	148.385	73.0004	871.883	46.3257	1.51083	1.53265	29.9263	153.899	81.8532	101.001	906.665	73.0004	779.232	43.8079	453.333	389.616	451.308	27.4378	3.66143	5.50112	5.47046
		2017-03-30	SM	P14 M	4.67	700.113	112.443	101.001	940.683	49.1436	1.50819	1.51707	35.2004	186.145	115.409	100.001	935.285	49.4606	1.50819	1.50735	33.424	183.1	112.721	73.0006	845.179	55.4812	1.50819	1.34378	24.562	157.722	64.3976	101.001	842.396	73.0006	734.217	39.4687	421.198	367.109	418.182	26.586	4.10102	5.61783	5.57583
		2018-11-14	SM	P176 F	4.54	766.557	107.712	101.001	1086.08	47.3638	1.44247	1.57657	38.3952	145.824	140.919	100.001	1082.59	47.531	1.44247	1.57102	37.9029	144.524	138.497	73.0004	969.004	53.7529	1.44247	1.38918	24.9926	115.169	77.9908	101.001	991.351	73.0004	861.499	40.3765	495.675	430.749	493.765	32.4821	4.37488	5.72412	5.68295
		2018-11-15	SM	P178 M	4.52	742.15	94.3123	101.001	1058.82	42.4772	1.41527	1.56882	37.3579	145.11	154.359	100.001	1056.75	42.5678	1.41527	1.56548	37.0315	143.849	152.153	73.0011	976.076	46.4389	1.41527	1.43498	26.7312	111.311	92.5488	101.001	973.863	73.0011	883.198	27.4992	486.932	441.599	485.805	43.9713	5.01346	6.71948	6.65398
		2018-11-16	SM	P179 M	4.97	781.368	109.84	101.001	1091.9	52.6537	1.34797	1.54758	31.8413	137.103	126.153	100.001	1088.17	52.8536	1.34797	1.54173	31.3675	135.97	123.91	73.0004	970.039	60.1384	1.34797	1.35497	19.3059	110.386	68.76	101.001	986.588	73.0004	849.762	43.1326	493.294	424.881	491.229	30.926	4.21242	5.59878	5.55998
		mean			4.572	727.221	106.316	101.001	1032.98	46.4042	1.44495	1.59365	37.6392	161.493	137.6	100.001	1029.3	46.5924	1.44495	1.58731	36.9029	159.813	135.133	73.0006	926.436	52.4274	1.44495	1.41111	25.1036	129.697	77.1101	101.001	940.173	73.0006	821.581	38.857	470.086	410.791	468.058	32.2806	4.27264	5.83227	5.78864
		SD			0.292181	54.8797	7.01608	0.000184107	66.2412	4.97892	0.068251	0.094829	5.0116	26.1104	16.5776	0.000173361	67.0359	5.02566	0.068251	0.0948736	5.14637	25.5492	16.6198	0.000280137	62.7615	5.9924	0.068251	0.0766616	3.86737	23.9435	11.1013	0.000184107	64.4045	0.000280137	62.4703	6.60443	32.2023	31.2352	32.7142	6.97189	0.491405	0.502245	0.489588
		SEM			0.130668	24.5429	3.13769	8.23349e-05	29.624	2.22664	0.0305228	0.0424088	2.24126	11.6769	7.41373	7.75293e-05	29.9793	2.24754	0.0305228	0.0424288	2.30153	11.426	7.43259	0.000125281	28.0678	2.67988	0.0305228	0.0342841	1.72954	10.7079	4.96465	8.23349e-05	28.8026	0.000125281	27.9376	2.95359	14.4013	13.9688	14.6302	3.11793	0.219763	0.224611	0.21895
	P140 - Wt	2017-06-20	SM	P22	5.44	810.184	108.673	126.001	1334.24	35.4264	1.65684	1.85145	76.1275	275.327	299.536	100.001	1276.75	37.1178	1.65684	1.76709	64.2725	221.937	215.962	98.001	1271.09	37.2933	1.65684	1.75877	63.269	218.059	209.594	126.001	1263.39	98.001	1196.51	14.9742	631.695	598.253	601.257	81.5173	5.04012	8.0326	6.51719
		2017-10-16	SM	P65	4.56	840.89	103.926	126.001	1360.86	36.069	1.60284	1.79764	78.8782	263.834	300.098	100.001	1283.51	38.3765	1.60284	1.68955	63.3188	212.699	209.615	98.0005	1276	38.6171	1.60284	1.67902	62.0303	209.001	202.79	126.001	1288.72	98.0005	1198.76	20.1029	644.361	599.38	603.379	67.8761	4.44819	7.25736	5.94147
		2017-07-18	SM	P32	5.31	865.787	116.222	126.001	1419.63	39.4965	1.59815	1.84125	69.3383	252.363	285.097	100.001	1347.4	41.7498	1.59815	1.74188	56.0184	202.198	201.802	98.0006	1340.53	41.9779	1.59815	1.73241	54.9361	198.605	195.552	126.001	1340.64	98.0006	1256.58	17.9203	670.32	628.289	631.95	75.1875	4.90604	7.48888	6.20924
		2017-07-24	SM	P35	4.89	857.503	106.558	126.002	1384.11	36.3626	1.63279	1.79473	74.1807	267.478	302.911	100.001	1320.05	38.2329	1.63279	1.70694	61.3283	212.674	216.823	98.0006	1313.82	38.4254	1.63279	1.69838	60.2558	208.746	210.298	126.002	1311.38	98.0006	1236.97	16.1144	655.691	618.484	621.791	79.8286	4.86331	7.80216	6.37632
		2017-08-08	SM	P40	5.26	805.543	103.546	126.001	1361.08	34.9483	1.5684	1.88908	78.4837	263.45	310.312	100.001	1282.47	37.2181	1.5684	1.77387	62.1681	206.915	216.367	98.0005	1274.89	37.453	1.5684	1.76274	60.8292	202.953	209.307	126.001	1291.18	98.0005	1199.99	20.3565	645.589	599.994	604.017	67.2503	3.91807	7.21696	5.93266
		mean			5.092	835.981	107.785	126.001	1371.98	36.4606	1.61181	1.83483	75.4017	264.49	299.591	100.001	1302.04	38.539	1.61181	1.73586	61.4212	211.285	212.114	98.0007	1295.27	38.7533	1.61181	1.72627	60.2641	207.473	205.508	126.001	1299.06	98.0007	1217.76	17.8937	649.531	608.88	612.479	74.332	4.63515	7.55959	6.19537
		SD			0.360791	27.2381	5.15597	0.000316407	31.9555	1.78438	0.0339831	0.0395346	3.88482	8.29056	9.16908	0.000169484	30.6092	1.88373	0.0339831	0.0368702	3.22053	7.40034	6.47394	0.000199778	30.6762	1.89382	0.0339831	0.0368598	3.19594	7.33287	6.33593	0.000316407	28.819	0.000199778	27.4059	2.37888	14.4095	13.7029	13.6582	6.60306	0.457877	0.35225	0.259801
		SEM			0.161351	12.1813	2.30582	0.000141501	14.2909	0.798	0.0151977	0.0176804	1.73734	3.70765	4.10054	7.57956e-05	13.6888	0.842428	0.0151977	0.0164888	1.44027	3.30953	2.89524	8.93434e-05	13.7188	0.846942	0.0151977	0.0164842	1.42927	3.27936	2.83351	0.000141501	12.8882	8.93434e-05	12.2563	1.06387	6.44411	6.12814	6.10813	2.95298	0.204769	0.157531	0.116187
	P140 - GG	2019-11-01	SM	GG6255	5.27	1026	154.619	101.014	1075.06	124.897	1.13533	1.09041	2.82027	39.5446	44.4928	100.005	1074.62	124.964	1.13533	1.08983	2.79661	39.3119	43.994	73.0028	1059.47	127.309	1.13533	1.06975	2.11234	32.3796	30.7654	101.014	825.267	73.0028	804.853	6.79168	412.634	402.427	412.346	116.161	13.6647	11.864	11.7684
		2019-11-08	SM	GG6235	4.78	689.558	121.985	101.001	923.298	69.8232	1.16181	1.50373	15.0477	71.0475	75.5636	100.001	920.339	70.0879	1.16181	1.49805	14.7644	70.3445	74.2012	73.0006	832.195	79.1335	1.16181	1.32681	7.93171	54.6792	41.4424	101.001	783.652	73.0006	673.928	43.6135	391.826	336.964	390.082	24.7095	4.38463	5.61527	5.58111
		2019-11-27	SM	GG6228	6.14	833.853	140.881	101.002	951.78	105.222	1.09599	1.22163	5.17961	44.8772	47.4358	100.002	950.787	105.363	1.09599	1.22	5.11644	44.637	46.8226	73.0014	917.319	110.389	1.09599	1.16445	3.34356	37.4038	30.7056	101.002	741.337	73.0014	696.541	17.2272	370.668	348.271	370.031	46.4288	7.15821	7.91382	7.8507
		2019-12-02	SM	GG6233	6.19	769	130.921	101.001	1034.73	72.3945	1.19908	1.50818	16.1761	80.5049	82.7653	100.001	1031.84	72.6307	1.19908	1.50328	15.9087	79.8246	81.3702	73.0006	945.933	80.5009	1.19908	1.35631	9.43167	64.6255	47.4485	101.001	889.946	73.0006	784.931	35.8389	444.973	392.466	443.29	30.8377	4.78418	5.88653	5.85465
		2019-12-04	SM	GG6238	6.5	902	159.265	101.011	996.292	121.245	1.11496	1.17814	3.456	37.7464	41.8629	100.008	995.734	121.335	1.11496	1.17727	3.42514	37.5984	41.3758	73.0042	977.113	124.424	1.11496	1.14804	2.56011	33.0817	28.4839	101.011	753.803	73.0042	728.266	9.39107	376.901	364.133	376.532	80.1086	10.7434	10.3089	10.238
		mean			5.776	844.082	141.534	101.006	996.233	98.7162	1.14144	1.30042	8.53594	54.7441	58.4241	100.003	994.664	98.8759	1.14144	1.29768	8.40226	54.3433	57.5528	73.0019	946.406	104.351	1.14144	1.21307	5.07588	44.434	35.7692	101.006	798.801	73.0019	737.704	22.5725	399.4	368.852	398.456	59.6491	8.14702	8.3177	8.25858
		SD			0.720437	128.519	15.6593	0.00630369	61.2204	26.2817	0.0404424	0.193495	6.52908	19.6642	19.2052	0.00307298	61.6957	26.1944	0.0404424	0.19115	6.39952	19.4029	18.7424	0.00156531	83.0917	23.298	0.0404424	0.123072	3.36308	14.4591	8.25143	0.00630369	60.3414	0.00156531	56.1031	16.356	30.1707	28.0515	29.8402	38.2028	3.98836	2.73487	2.70884
		SEM			0.322189	57.4753	7.00304	0.00281909	27.3786	11.7535	0.0180864	0.0865337	2.91989	8.7941	8.5888	0.00137428	27.5911	11.7145	0.0180864	0.0854847	2.86195	8.67722	8.38185	0.000700029	37.1597	10.4192	0.0180864	0.0550395	1.50402	6.46633	3.69015	0.00281909	26.9855	0.000700029	25.0901	7.31464	13.4927	12.545	13.3449	17.0848	1.78365	1.22307	1.21143
	P168 - Wt	2020-07-17	SM	WT160	4.84	812.615	102.176	126.001	1262.98	38.4974	1.5399	1.72355	63.2204	226.258	258.753	100.001	1193.25	40.9074	1.5399	1.62201	50.0646	182.872	181.113	98.0006	1186.58	41.1544	1.5399	1.61228	48.9922	179.756	175.289	126.001	1185.98	98.0006	1104.27	19.8216	592.991	552.136	555.717	62.9862	4.70827	7.28759	6.01217
		2020-08-24	SM	WT249	4.66	775.898	89.9875	126.001	1238.57	31.1277	1.64224	1.76035	82.1845	291.5	317.406	100.001	1178.97	32.7914	1.64224	1.67104	68.234	233.386	226.337	98.0007	1173.12	32.9648	1.64224	1.66225	67.0584	229.201	219.414	126.001	1176.31	98.0007	1107.19	16.7245	588.157	553.594	556.696	70.0675	4.72378	7.71786	6.26989
		2020-08-25	SM	WT257	4.04	793.506	103.493	126.001	1239.5	37.1897	1.59709	1.74245	69.2121	241.331	263.14	100.001	1173.23	39.4373	1.59709	1.64314	56.2651	193.712	184.977	98.0006	1166.75	39.6721	1.59709	1.63342	55.1848	190.337	179.061	126.001	1165.12	98.0006	1087.41	19.1445	582.561	543.703	547.176	63.9956	4.54742	7.41122	6.03993
		2020-09-03	SM	WT269	4.74	782.037	98.4222	126.002	1235.16	35.11	1.59689	1.75545	73.8296	263.314	278.686	100.001	1165.45	37.3491	1.59689	1.65021	59.4083	213.938	194.678	98.0006	1158.9	37.5749	1.59689	1.64029	58.2537	210.493	188.419	126.002	1164.94	98.0006	1083.75	20.0674	582.47	541.875	545.378	60.5288	4.74604	7.20824	6.00781
		2020-09-04	SM	WT268	4.89	814.057	95.338	126.003	1319.93	33.774	1.57743	1.7895	80.2385	274.595	311.456	100.001	1246.84	35.871	1.57743	1.6849	64.5179	219.923	218.372	98.0006	1239.83	36.0863	1.57743	1.67484	63.2317	216.059	211.38	126.003	1252.38	98.0006	1167.65	19.4358	626.189	583.826	587.548	66.796	4.64392	7.30311	6.01876
		mean			4.634	795.623	97.8834	126.001	1259.23	35.1398	1.59071	1.75426	73.737	259.4	285.888	100.001	1191.55	37.2712	1.59071	1.65426	59.698	208.766	201.095	98.0006	1185.03	37.4905	1.59071	1.64461	58.5442	205.169	194.713	126.001	1188.95	98.0006	1110.05	19.0388	594.473	555.027	558.503	64.8748	4.67388	7.3856	6.06971
		SD			0.343773	17.3686	5.45465	0.000711413	35.6842	2.8913	0.0370535	0.0243055	7.82163	25.9877	27.1695	4.77379e-05	32.5363	3.16029	0.0370535	0.0244947	7.08458	20.3374	20.2235	4.31062e-05	32.2635	3.18763	0.0370535	0.0245665	7.01918	19.939	19.6841	0.000711413	36.5232	4.31062e-05	33.7788	1.34123	18.2616	16.8894	16.994	3.67024	0.0802668	0.199324	0.112582
		SEM			0.15374	7.76749	2.4394	0.000318154	15.9585	1.29303	0.0165708	0.0108697	3.49794	11.6221	12.1506	2.1349e-05	14.5507	1.41332	0.0165708	0.0109543	3.16832	9.09517	9.04421	1.92777e-05	14.4287	1.42555	0.0165708	0.0109865	3.13907	8.91701	8.803	0.000318154	16.3337	1.92777e-05	15.1063	0.599814	8.16684	7.55316	7.59996	1.64138	0.0358964	0.0891404	0.0503483
	P168 - GG	2019-12-31	SM	GG6245	5.24	963.678	141.217	101.015	928.233	138.007	1.065	0.960806	0.328823	76.2904	31.8233	100.015	928.103	138.035	1.065	0.960615	0.328823	75.9598	31.493	73.0154	924.598	138.781	1.065	0.955445	0.328823	67.054	22.6922	101.015	652.218	73.0154	647.035	2.14606	326.109	323.517	326.017	228.927	13.825	18.7349	18.7285
		2020-01-21	SM	GG6269	5.5	993.799	136.792	101.032	1022.64	125.733	1.03956	1.04656	1.07254	38.4813	41.3075	100.414	1022.57	125.743	1.03956	1.04647	1.0699	38.3734	41.0469	73.018	1019	126.329	1.03956	1.04161	0.94886	33.6854	29.5266	101.032	771.174	73.018	766.34	1.68867	385.587	383.17	385.544	392.155	28.3237	22.5503	22.45
		2020-02-17	SM	GG6294	5.24	869.985	145.256	101.015	942.282	111.165	1.13941	1.1468	3.19333	35.6571	43.6103	100.011	942.058	111.199	1.13941	1.14644	3.17983	35.4397	43.1457	73.065	933.791	112.494	1.13941	1.13325	2.76035	29.4327	30.6882	101.015	719.953	73.065	708.803	4.22134	359.977	354.402	359.83	164.023	14.0673	15.0939	14.9542
		2020-08-21	SM	GG251	5.41	938.422	111.017	101.008	951.827	105.727	1.02684	1.0226	2.02604	130.163	47.1507	100.008	951.556	105.765	1.02684	1.02222	2.00656	129.831	46.6449	73.006	943.342	106.954	1.02684	1.01086	1.55463	119.818	33.1902	101.008	740.374	73.006	729.433	4.01785	370.187	364.716	370.012	146.439	16.087	14.0638	13.998
		2020-08-22	SM	GG259	5.02	930.982	127.759	101.003	1020.53	95.9766	1.15646	1.15106	5.393	56.3604	58.1259	100.005	1019.92	96.047	1.15646	1.15021	5.35059	56.1824	57.457	73.0021	999.383	98.4983	1.15646	1.12159	4.14574	50.5462	39.642	101.003	828.579	73.0021	802.386	8.74409	414.289	401.193	413.915	88.1849	12.7896	10.3164	10.2437
		mean			5.282	939.373	132.408	101.015	973.103	115.321	1.08545	1.06556	2.40275	67.3905	44.4035	100.091	972.843	115.358	1.08545	1.06519	2.38714	67.1572	43.9575	73.0213	964.022	116.611	1.08545	1.05255	1.94768	60.1072	31.1478	101.015	742.46	73.0213	730.799	4.1636	371.23	365.4	371.064	203.946	17.0185	16.1519	16.0749
		SD			0.184445	45.9318	13.6114	0.0108892	45.0533	16.6327	0.0589776	0.0822949	1.98615	38.6783	9.54369	0.180798	44.9789	16.6155	0.0589776	0.0821027	1.97022	38.6018	9.4068	0.0252751	42.3341	16.0019	0.0589776	0.0751093	1.5219	36.5514	6.13717	0.0108892	64.9911	0.0252751	58.9279	2.7929	32.4955	29.464	32.4132	116.563	6.43171	4.66754	4.67054
		SEM			0.0824864	20.5413	6.08718	0.00486981	20.1484	7.43839	0.0263756	0.0368034	0.888232	17.2974	4.26807	0.0808552	20.1152	7.43068	0.0263756	0.0367175	0.881108	17.2633	4.20685	0.0113033	18.9324	7.15626	0.0263756	0.0335899	0.680614	16.3463	2.74463	0.00486981	29.0649	0.0113033	26.3534	1.24902	14.5324	13.1767	14.4956	52.1287	2.87635	2.08739	2.08873
	P168+Lona 68d	2020-10-20	SM	GG318	4.78	893.533	107.613	101.005	997.953	80.615	1.14366	1.16722	7.79003	70.2902	69.8836	100.016	997.471	80.6615	1.14366	1.16654	7.74996	69.9499	69.1118	73.0032	972.535	83.1486	1.14366	1.13165	6.04617	58.6451	47.1862	101.005	836.723	73.0032	806.238	10.1283	418.362	403.119	418.074	104.263	9.1776	11.1629	10.9712
		2020-10-21	SM	GG316	6.45	933.409	112.34	101.012	959.461	101.692	1.05744	1.0447	3.52702	134.975	50.0633	100.013	959.288	101.715	1.05744	1.04446	3.51561	134.829	49.5424	73.0085	953.742	102.468	1.05744	1.03679	3.20502	130.825	35.5649	101.012	756.077	73.0085	748.807	2.60036	378.039	374.404	377.929	232.464	20.7587	17.5346	17.438
		2020-10-22	SM	GG314	5.92	1016.19	112.34	101.023	1002.96	106.572	1.0629	0.991739	4.05332	209.181	49.9077	100.023	1002.87	106.584	1.0629	0.991632	4.04796	209.015	49.4016	73.0235	1000.57	106.895	1.0629	0.988741	3.92361	204.539	35.828	101.023	789.812	73.0235	786.78	1.03252	394.906	393.39	394.852	500.121	7.34847	25.1638	25.1588
		2020-10-23	SM	GG340	4.17	823.461	127.903	101.005	932.766	95.2277	1.11544	1.20412	5.76357	57.4273	52.4843	100.007	932.294	95.2882	1.11544	1.20336	5.73042	57.2271	51.8915	73.0016	910.93	98.1254	1.11544	1.16857	4.48808	50.1622	35.4428	101.005	742.31	73.0016	714.679	10.3555	371.155	357.34	370.859	86.3917	9.3349	10.7881	10.6378
		mean			5.33	916.649	115.049	101.012	973.284	96.0267	1.09486	1.10194	5.28348	117.968	55.5847	100.015	972.981	96.0621	1.09486	1.1015	5.26099	117.755	54.9868	73.0092	959.444	97.6592	1.09486	1.08144	4.41572	111.043	38.5055	101.012	781.231	73.0092	764.126	6.02917	390.615	382.063	390.428	230.81	11.6549	16.1623	16.0515
		SD			1.04093	80.4319	8.8546	0.00869066	33.2759	11.2762	0.041741	0.100206	1.92455	69.6359	9.6053	0.00673709	33.3472	11.2611	0.041741	0.0998846	1.90902	69.6873	9.48567	0.00995472	37.6334	10.3151	0.041741	0.0830638	1.20714	72.076	5.78941	0.00869066	42.034	0.00995472	40.6866	4.90725	21.017	20.3433	21.0004	190.964	6.13582	6.75244	6.8309
		SEM			0.520465	40.2159	4.4273	0.00434533	16.6379	5.63812	0.0208705	0.0501029	0.962276	34.8179	4.80265	0.00336854	16.6736	5.63056	0.0208705	0.0499423	0.954512	34.8436	4.74283	0.00497736	18.8167	5.15753	0.0208705	0.0415319	0.603571	36.038	2.8947	0.00434533	21.017	0.00497736	20.3433	2.45362	10.5085	10.1717	10.5002	95.4821	3.06791	3.37622	3.41545
	P168+Lona 147d	2021-01-28	ABR	GG469	6.524	883.537	112.592	101.003	1014.25	78.6143	1.18011	1.21362	10.2097	76.159	73.399	100.002	1012.55	78.7702	1.18011	1.21122	10.0653	75.768	72.3579	73.0009	956.606	84.3239	1.18011	1.13144	6.12507	63.9626	45.4722	101.003	857.02	73.0009	787.958	23.4769	428.51	393.979	427.506	40.8316	6.56261	6.90244	6.82602
		2021-01-29	ABR	GG431	5.951	946.391	134.063	101.006	1046.91	111.192	1.04671	1.15189	3.40582	34.934	49.9278	100.007	1046.53	111.243	1.04671	1.15136	3.38418	34.7311	49.382	73.005	1029.05	113.661	1.04671	1.12687	2.50102	29.2014	34.3268	101.006	824.523	73.005	801.727	7.61642	412.262	400.864	412.02	125.306	11.4984	12.3278	12.1484
		2021-01-29	ABR	GG459	3.607	1053.64	129.362	101.005	1069.07	103.484	1.19659	1.04469	3.52603	46.7877	56.0911	100.005	1068.63	103.538	1.19659	1.04415	3.49717	46.5338	55.4717	73.0027	1052.51	105.516	1.19659	1.02458	2.61927	38.6293	38.8089	101.005	862.103	73.0027	841.481	6.56437	431.051	420.74	430.775	125.37	16.1795	12.0592	11.927
		2021-01-30	ABR	GG449	5.619	838.92	116.152	101.004	951.685	86.04	1.12716	1.19768	5.77395	47.2958	61.0069	100.012	950.96	86.1201	1.12716	1.19657	5.7175	47.0385	60.283	73.0028	925.745	89.013	1.12716	1.15768	4.0753	39.5409	40.878	101.004	779.605	73.0028	747.719	11.4227	389.802	373.86	389.36	66.0646	10.0671	9.20549	9.13186
		2021-02-01	ABR	GG446	3.706	945.714	135.073	101.023	1060.26	97.3958	1.16759	1.18778	6.525	54.6303	59.8408	100.048	1059.76	97.4524	1.16759	1.18709	6.4904	54.3424	59.1867	73.007	1037.53	100.031	1.16759	1.15649	5.22001	45.2646	40.7438	101.023	865.467	73.007	837.465	8.95175	432.734	418.733	432.426	107.459	10.1884	11.1428	10.9899
		mean			5.0814	933.641	125.449	101.008	1028.43	95.3452	1.14363	1.15913	5.8881	51.9614	60.0531	100.015	1027.68	95.4247	1.14363	1.15808	5.83091	51.6828	59.3363	73.0037	1000.29	98.5089	1.14363	1.11941	4.10813	43.3198	40.0459	101.008	837.744	73.0037	803.27	11.6064	418.872	401.635	418.417	93.0061	10.8992	10.3275	10.2047
		SD			1.34089	80.919	10.4147	0.00843365	47.6893	13.1156	0.0599499	0.0678698	2.77651	15.2571	8.62102	0.0190044	47.8942	13.0777	0.0599499	0.0674014	2.72994	15.1873	8.43362	0.00234929	55.6912	11.9622	0.0599499	0.0548482	1.58941	12.8988	4.02684	0.00843365	36.3609	0.00234929	38.5749	6.87987	18.1805	19.2874	18.144	37.9064	3.47291	2.27235	2.23202
		SEM			0.599662	36.1881	4.65761	0.00377164	21.3273	5.86546	0.0268104	0.0303523	1.24169	6.82316	3.85544	0.00849902	21.4189	5.84851	0.0268104	0.0301428	1.22087	6.79196	3.77163	0.00105064	24.9059	5.34967	0.0268104	0.0245289	0.710806	5.76851	1.80086	0.00377164	16.2611	0.00105064	17.2512	3.07677	8.13055	8.62561	8.11425	16.9522	1.55313	1.01623	0.99819
	P140+Lona 40d	2020-09-22	SM	GG327	4.2	895.78	141.037	101.007	1026.25	91.7827	1.2411	1.23812	9.94548	69.2732	61.8185	100.009	1025.08	91.9103	1.2411	1.2364	9.86014	68.8918	61.0192	73.0025	981.347	96.9821	1.2411	1.17174	7.22703	58.0514	39.5092	101.007	842.681	73.0025	787.383	18.8101	421.34	393.692	420.628	51.1223		7.78885	7.71096
		2020-09-23	SM	GG333	4.31	954.064	127.316	101.019	1015.95	93.4123	1.22143	1.11586	6.13588	57.5026	59.7704	100.014	1015.6	93.4524	1.22143	1.11539	6.11041	57.3063	59.1189	73.0208	1002.25	94.985	1.22143	1.09739	5.30714	51.0932	41.6258	101.019	829.127	73.0208	812.279	5.5563	414.563	406.14	414.346	139.83		12.9864	12.858
		2020-09-24	SM	GG336	4.02	823.754	122.624	101.032	912.347	85.7257	1.21327	1.17898	6.67173	62.5198	58.2063	100.005	911.879	85.7799	1.21327	1.17824	6.63514	62.1526	57.5332	73.0024	895.055	87.7802	1.21327	1.15139	5.53436	52.1925	39.8872	101.032	740.896	73.0024	719.494	7.9598	370.448	359.747	370.16	89.7798		11.0081	10.9041
		2020-09-25	SM	GG345	4.04	809.912	119.998	101.006	926.659	80.2815	1.2184	1.22679	8.80351	58.1883	64.2507	100.008	925.848	80.3666	1.2184	1.22549	8.73589	57.8921	63.4676	73.0022	895.214	83.734	1.2184	1.1762	6.61581	49.1277	42.294	101.006	766.096	73.0022	727.746	14.1148	383.048	363.873	382.557	57.8002		8.68607	8.59972
		mean			4.1425	870.878	127.744	101.016	970.301	87.8006	1.22355	1.18994	7.88915	61.871	61.0115	100.009	969.6	87.8773	1.22355	1.18888	7.83539	61.5607	60.2847	73.007	943.466	90.8703	1.22355	1.14918	6.17109	52.6162	40.829	101.016	794.7	73.007	761.726	11.6103	397.35	380.863	396.923	84.6331	#DIV/0!	10.1174	10.0182
		SD			0.137689	67.0262	9.36479	0.0122938	59.0961	6.00528	0.012179	0.0556364	1.79077	5.41169	2.61747	0.00367405	58.9892	6.00434	0.012179	0.055115	1.76321	5.34335	2.55602	0.00921159	56.4577	6.18491	0.012179	0.036178	0.906387	3.83885	1.3429	0.0122938	48.9912	0.00921159	45.2847	6.00241	24.4956	22.6424	24.4139	40.4812	#DIV/0!	2.34489	2.3227
		SEM			0.0688446	33.5131	4.68239	0.00614692	29.5481	3.00264	0.00608948	0.0278182	0.895387	2.70584	1.30874	0.00183702	29.4946	3.00217	0.00608948	0.0275575	0.881604	2.67167	1.27801	0.0046058	28.2288	3.09246	0.00608948	0.018089	0.453193	1.91942	0.671448	0.00614692	24.4956	0.0046058	22.6424	3.0012	12.2478	11.3212	12.2069	20.2406	#DIV/0!	1.17244	1.16135
	P168+Rapa HD 68d	2021-02-02	SM	GG489	4.6	862.616	116.028	101.006	972.784	80.0721	1.21186	1.19572	6.86671	54.4894	68.3327	100.015	972.24	80.1258	1.21186	1.19492	6.82112	54.1379	67.5626	73.0041	952.926	82.0829	1.21186	1.16643	5.46537	44.454	46.7632	101.006	812.64	73.0041	788.76	8.10967	406.32	394.38	405.994	90.8526		10.5735	10.4893
		2021-02-10	SM	GG501	5	858.747	108.43	101.054	943.145	84.487	1.12146	1.14439	5.38936	57.0906	61.7259	100.005	942.748	84.5303	1.12146	1.14381	5.35786	56.7645	61.0157	73.0096	927.218	86.2658	1.12146	1.12079	4.33075	47.7207	42.5768	101.054	774.171	73.0096	754.686	6.90522	387.086	377.343	386.843	113.048		12.0841	11.9323
			SM
			SM
			SM
		mean			4.8	860.681	112.229	101.03	957.965	82.2795	1.16666	1.17006	6.12803	55.79	65.0293	100.01	957.494	82.3281	1.16666	1.16936	6.08949	55.4512	64.2891	73.0069	940.072	84.1744	1.16666	1.14361	4.89806	46.0873	44.67	101.03	793.406	73.0069	771.723	7.50744	396.703	385.862	396.419	101.95	#DIV/0!	11.3288	11.2108
		SD			0.282843	2.7358	5.37315	0.034382	20.9583	3.12177	0.0639234	0.0362961	1.04464	1.83929	4.67168	0.00666625	20.8539	3.11445	0.0639234	0.0361444	1.03468	1.85729	4.62941	0.00390763	18.1785	2.95774	0.0639234	0.0322698	0.802297	2.3099	2.96026	0.034382	27.2018	0.00390763	24.094	0.851673	13.6009	12.047	13.5414	15.6944	#DIV/0!	1.06811	1.02034
		SEM			0.2	1.9345	3.79939	0.0243117	14.8198	2.20743	0.0452007	0.0256652	0.73867	1.30057	3.30337	0.00471375	14.7459	2.20225	0.0452007	0.025558	0.731632	1.3133	3.27348	0.00276311	12.8542	2.09144	0.0452007	0.0228182	0.56731	1.63335	2.09322	0.0243117	19.2346	0.00276311	17.0371	0.602223	9.6173	8.51853	9.57523	11.0976	#DIV/0!	0.755268	0.721492
	P168+Lona 147d + Rapa LD 68d	2021-04-26	SM	GG680	4.72	968.429	142.63	101.013	980.103	113.371	1.19866	1.04957	2.921	42.9777	44.7446	100.014	979.861	113.408	1.19866	1.04923	2.90672	42.7705	44.2697	73.0081	971.761	114.643	1.19866	1.03793	2.50147	37.1697	31.5191	101.013	753.36	73.0081	742.476	3.92622	376.68	371.238	376.523	166.316		14.8582	14.7577
		2021-04-26	SM	GG681	4.48	1037.31	120.451	101.002	1026.04	96.4526	1.23172	1.01388	4.08604	58.5365	58.156	100.002	1024.89	96.5854	1.23172	1.01249	4.08604	58.1152	57.4037	73.0017	993.732	100.363	1.23172	0.974381	2.96454	46.8195	38.4505	101.002	833.133	73.0017	793.006	13.5548	416.567	396.503	415.861	52.9415		7.97151	7.95551
		2021-04-27	SM	GG666	3.81	976.361	130.485	101.115	951.764	109.365	1.19804	0.995889	2.25534	44.5916	45.178	100.014	951.596	109.39	1.19804	0.995661	2.24505	44.3811	44.6628	73.0473	946.628	110.137	1.19804	0.988904	1.98644	39.226	32.1132	101.115	733.035	73.0473	726.354	2.45801	366.517	363.177	366.408	245.799		18.3116	18.19
		2021-04-27	SM	GG667	4.26	957.197	134.559	101.012	973.371	113.694	1.13253	1.04502	2.43241	52.8472	44.1805	100.21	973.226	113.716	1.13253	1.04482	2.42387	52.6734	43.8101	73.0559	967.174	114.648	1.13253	1.03633	2.12105	46.7006	31.343	101.012	745.983	73.0559	737.879	2.94662	372.991	368.939	372.897	215.335		16.99	16.8986
		2021-04-27	SM	GG671	3.25	1012.85	131.649	101.66	1003.81	110.124	1.17875	1.01418	1.29288	41.0434	48.2182	100.313	1003.69	110.142	1.17875	1.01401	1.28516	40.7486	47.5618	73.0203	1000.62	110.575	1.17875	1.01004	1.12602	34.7776	34.3124	101.66	783.565	73.0203	779.469	1.37639	391.783	389.734	391.702	451.622		24.0077	23.8277
		mean			4.104	990.429	131.955	101.16	987.018	108.601	1.18794	1.02371	2.59753	47.9993	48.0955	100.111	986.653	108.648	1.18794	1.02324	2.58937	47.7378	47.5416	73.0267	975.983	110.073	1.18794	1.00952	2.1399	40.9387	33.5477	101.16	769.815	73.0267	755.837	4.85241	384.908	377.918	384.678	226.403	#DIV/0!	16.4278	16.3259
		SD			0.583292	33.4913	7.98931	0.283264	28.6425	7.0565	0.03636	0.0228275	1.02063	7.41193	5.83728	0.142663	28.3191	7.01116	0.03636	0.022927	1.02319	7.36274	5.70479	0.0239104	21.6741	5.83849	0.03636	0.0282218	0.682389	5.54257	2.98565	0.283264	39.9681	0.0239104	28.7676	4.95071	19.984	14.3838	19.7536	145.707	#DIV/0!	5.81575	5.75766
		SEM			0.260856	14.9778	3.57293	0.126679	12.8093	3.15576	0.0162607	0.0102088	0.456441	3.31472	2.61051	0.063801	12.6647	3.13548	0.0162607	0.0102533	0.457583	3.29272	2.55126	0.0106931	9.69296	2.61105	0.0162607	0.0126212	0.305174	2.47871	1.33522	0.126679	17.8743	0.0106931	12.8653	2.21402	8.93714	6.43264	8.83407	65.1619	#DIV/0!	2.60088	2.57491
	Material Properties
	Type	Date	Personnel	Mouse #	Elastic Fibers	Axial Collagen		Circumferential Collagen		Diagonal Collagen					Linearized Stiffness @ Sys (MPa)				Linearized Stiffness @ Fixed (MPa)				Linearized Stiffness @ Low fixed (MPa)
					c (kPa)	c11 (kPa)	c21	c12 (kPa)	c22	c13,4 (kPa)	c23,4	ao (deg)	RMSE		Cqqqq	Czzzz	Cqqzz	Cqzqz	Cqqqq	Czzzz	Cqqzz	Cqzqz	Cqqqq	Czzzz	Cqqzz	Cqzqz
	P42 - Wt	2020-10-07	SM	WT498	23.042	12.5064	2.22725e-14	14.0039	0.00572848	1.42845	0.766468	32.903	0.0506021		1.19757	2.28217	0.80959	1.05484	0.898107	1.81265	0.552655	0.768261	0.619338	1.38076	0.333744	0.521363
		2020-10-08	SM	WT503	29.2729	12.7372	2.23511e-14	10.1464	0.0353302	0.648401	1.23867	29.8709	0.0545195		1.37546	3.02311	1.06301	1.31504	1.0097	2.29431	0.707952	0.925349	0.666781	1.61157	0.399296	0.583379
		2020-10-12	SM	WT519	18.3863	22.1705	1.8238e-13	18.5783	0.0144294	0.63069	1.38571	29.8081	0.0632207		1.16671	2.82044	0.839539	1.07567	0.89491	2.22507	0.574995	0.783915	0.639605	1.6883	0.352394	0.536196
		2019-03-12	SM	WTM_6W_M1	34.3373	10.2294	0.11147	16.7089	0.0421924	0.534691	1.46422	30.3445	0.0566068		1.63086	4.51824	1.45976	1.77537	1.21824	3.46191	0.99498	1.26668	0.828884	2.46672	0.585886	0.815216
		2019-03-13	SM	WTM_6W_M1	34.4931	9.6138	0.149546	12.622	0.117497	0.738153	1.46612	30.5108	0.0773694		1.30325	3.62221	1.05084	1.3316	0.970411	2.89379	0.744248	0.993095	0.651716	2.16952	0.458875	0.675281
		mean			27.9063	13.4515	0.0522031	14.4119	0.0430354	0.796077	1.26424	30.6875	0.0604637		1.33477	3.25324	1.04455	1.3105	0.998274	2.53755	0.714966	0.94746	0.681265	1.86337	0.426039	0.626287
		SD			7.087	5.06296	0.0727386	3.32413	0.0442003	0.36081	0.293229	1.27452	0.0104984		0.185329	0.854342	0.259816	0.290293	0.132295	0.644909	0.176955	0.20207	0.0843278	0.442926	0.101595	0.121513
		SEM			3.1694	2.26422	0.0325297	1.4866	0.019767	0.161359	0.131136	0.569985	0.00469503		0.0828816	0.382074	0.116193	0.129823	0.0591643	0.288412	0.0791365	0.0903686	0.0377126	0.198082	0.0454347	0.0543421
	P42 - GG	2019-12-18	SM	GG46	22.0892	17.0993	2.95583e-14	12.6521	0.000965573	0.61669	1.11347	32.1692	0.0636701		0.723616	1.55857	0.437445	0.622207	0.914225	1.90476	0.618528	0.821582	0.309575	0.867429	0.116311	0.262972
		2019-12-18	SM	GG47	22.5684	18.1826	2.42587e-14	14.8581	0.0154267	0.768443	1.49972	30.4444	0.075806		0.803316	1.61304	0.465029	0.633908	1.00318	1.9755	0.645007	0.831704	0.358149	0.870565	0.134722	0.265595
		2019-12-19	SM	GG50	13.3322	22.9499	2.3623e-14	16.1451	3.74551e-13	1.8731	1.18893	26.601	0.0836642		0.638177	1.73724	0.355476	0.531068	0.774118	2.0096	0.463248	0.653917	0.319824	1.14842	0.145551	0.287511
		2019-12-19	SM	GG60	15.1382	19.216	2.22045e-14	21.4208	2.22045e-14	1.30429	1.28826	28.7265	0.0783225		0.685127	1.62928	0.358507	0.52424	0.825638	1.90022	0.469579	0.649518	0.355565	1.05445	0.145364	0.279993
		2020-03-09	SM	GG163	28.1466	7.35776	3.98586e-12	17.4085	2.34168e-14	2.65454	1.14171	28.102	0.0814748		0.532583	1.47254	0.298373	0.464895	0.660404	1.73857	0.398837	0.581	0.251931	0.9283	0.115578	0.249013
		mean			20.2549	16.9611	8.171e-13	16.4969	0.00327845	1.44341	1.24642	29.2086	0.0765875		0.676564	1.60213	0.382966	0.555263	0.835513	1.90573	0.51904	0.707544	0.319009	0.973833	0.131505	0.269017
		SD			6.02285	5.8027	1.77139e-12	3.266	0.00680393	0.838133	0.15641	2.15342	0.00781737		0.100694	0.0972159	0.0674763	0.0713804	0.131185	0.104439	0.106974	0.112557	0.0431782	0.12353	0.014868	0.0150907
		SEM			2.6935	2.59504	7.9219e-13	1.4606	0.00304281	0.374824	0.0699488	0.96304	0.00349603		0.0450319	0.0434763	0.0301763	0.0319223	0.0586679	0.0467067	0.0478401	0.0503372	0.0193099	0.0552445	0.00664918	0.00674876
	P100 - Wt	2017-03-31	SM	P17 F	20.2815	5.7759	0.290948	14.8112	0.0134369	1.88386	0.629336	33.1453	0.0922492		1.61674	3.39303	1.10416	1.41379	0.979647	2.48484	0.595922	0.84446	0.937289	2.42394	0.563991	0.808343
		2018-10-16	SM	P157 M	25.6728	10.3969	0.180711	13.4302	0.00399761	1.6561	1.0008	27.2278	0.0606633		1.34643	2.99833	0.903795	1.16306	0.777153	1.90923	0.416862	0.614942	0.740626	1.84237	0.38942	0.583642
		2018-10-24	SM	P162 M	44.4732	10.6285	0.120094	10.967	0.137086	1.43648	1.08176	36.3828	0.0622725		1.78172	2.53031	1.04293	1.33233	1.00032	1.72067	0.52885	0.768873	0.948144	1.66436	0.495271	0.731775
		2019-01-11	SM	P199 M	29.514	12.4702	0.196734	6.64391	0.106441	0.704998	1.18729	34.5819	0.0690067		2.11871	2.89857	1.34799	1.61188	1.24793	1.99571	0.730182	0.944683	1.18798	1.93174	0.688495	0.899424
		2019-01-28	SM	P210 F	31.2344	11.1319	0.0906116	13.1344	0.056651	0.856376	0.984195	32.7525	0.0616689		1.93211	3.18666	1.22352	1.51614	1.13541	2.11396	0.63058	0.865076	1.08197	2.04127	0.592795	0.823263
		mean			30.2352	10.0807	0.17582	11.7973	0.0635225	1.30756	0.976675	32.8181	0.0691721		1.75914	3.00138	1.12448	1.40744	1.02809	2.04488	0.580479	0.807607	0.979203	1.98074	0.545994	0.769289
		SD			9.00185	2.53703	0.0775912	3.19315	0.0577767	0.509135	0.210169	3.43441	0.0133124		0.295939	0.324115	0.169949	0.172492	0.177436	0.284725	0.116828	0.12457	0.168665	0.283607	0.111701	0.11963
		SEM			4.02575	1.1346	0.0346999	1.42802	0.0258385	0.227692	0.0939903	1.53592	0.00595349		0.132348	0.144949	0.0760037	0.0771407	0.0793516	0.127333	0.0522473	0.0557094	0.0754292	0.126833	0.0499544	0.0535003
	P100 - GG	2017-03-29	SM	P18 F	10.374	19.4037	3.36093e-12	14.0816	2.33734e-14	2.75717	1.0206	23.598	0.111108		0.67944	2.16458	0.406498	0.60125	0.666147	2.13588	0.396662	0.589764	0.360998	1.49971	0.193608	0.349441
		2017-03-30	SM	P14 M	9.95055	14.5817	7.48916e-12	23.257	2.24924e-14	5.47612	0.936922	24.0199	0.0842993		0.540987	2.01254	0.298515	0.486561	0.52572	1.89183	0.262163	0.446256	0.312966	1.58388	0.175427	0.335572
		2018-11-14	SM	P176 F	22.9213	14.1104	0.175038	16.1223	0.0470307	1.41078	1.80457	28.4601	0.0581386		0.685801	1.5525	0.365319	0.515576	0.670998	1.52693	0.354723	0.503711	0.341361	0.974372	0.142099	0.262976
		2018-11-15	SM	P178 M	32.2025	2.28138	1.69146	6.55019	0.339167	0.852121	2.39977	33.3637	0.0803032		1.03517	1.84646	0.586713	0.738355	1.01059	1.81992	0.571451	0.721861	0.44003	1.16435	0.215828	0.334947
		2018-11-16	SM	P179 M	23.5154	10.3008	1.52435	15.2375	0.0449213	3.14797	2.18056	27.0054	0.0474175		0.587347	1.71014	0.292398	0.434905	0.574628	1.68978	0.284015	0.42543	0.295166	1.25449	0.117722	0.235157
		mean			19.7927	12.1356	0.678169	15.0497	0.0862239	2.72883	1.66848	27.2894	0.0762533		0.70575	1.85724	0.389889	0.555329	0.689616	1.81287	0.373803	0.537404	0.350104	1.29536	0.168937	0.303619
		SD			9.52928	6.3871	0.853777	5.95241	0.143258	1.80162	0.665295	3.95804	0.0247771		0.19415	0.241451	0.119867	0.118763	0.189739	0.22778	0.12296	0.121189	0.0563013	0.24843	0.0393471	0.0510905
		SEM			4.26163	2.8564	0.381821	2.662	0.064067	0.805709	0.297529	1.77009	0.0110806		0.0868263	0.10798	0.0536063	0.0531125	0.0848538	0.101866	0.0549894	0.0541974	0.0251787	0.111101	0.0175966	0.0228483
	P140 - Wt	2017-06-20	SM	P22	26.1393	5.76306	0.258713	7.8332	0.0608819	0.753543	0.828172	39.0135	0.101047		2.30103	2.89938	1.51735	1.79545	1.37603	2.06624	0.83948	1.06447	1.31242	2.00706	0.793521	1.01466
		2017-10-16	SM	P65	31.1379	4.3301	0.360609	10.7132	0.0856108	1.4643	0.873474	34.2897	0.0661212		1.88184	2.78958	1.09304	1.36063	1.11005	1.98053	0.599886	0.816832	1.05765	1.92351	0.567063	0.780363
		2017-07-18	SM	P32	21.0531	6.91722	0.27777	11.0666	0.061109	1.21777	0.892909	34.0063	0.0853313		1.90365	2.88455	1.18518	1.43998	1.16717	2.06491	0.671445	0.87636	1.11675	2.00749	0.637266	0.838617
		2017-07-24	SM	P35	27.0418	4.30421	0.342066	11.2279	0.0681038	0.868404	0.944138	37.5616	0.088394		2.19535	3.03295	1.4529	1.72353	1.32245	2.12389	0.797079	1.01323	1.26278	2.06025	0.753374	0.965637
		2017-08-08	SM	P40	24.1536	8.06191	0.301226	11.2394	0.0291129	1.65492	0.827005	34.244	0.0882915		1.92428	2.76596	1.21683	1.48303	1.14241	1.92687	0.642146	0.852181	1.09002	1.8696	0.605187	0.8113
		mean			25.9052	5.8753	0.308077	10.4161	0.0609637	1.19179	0.873139	35.823	0.0858371		2.04123	2.87448	1.29306	1.56052	1.22362	2.03249	0.710007	0.924615	1.16792	1.97358	0.671282	0.882115
		SD			3.71949	1.63825	0.0427701	1.45942	0.0204509	0.382774	0.0489441	2.31011	0.0125786		0.193171	0.105852	0.18256	0.188586	0.117978	0.0781025	0.103154	0.10794	0.112613	0.0759961	0.097556	0.10223
		SEM			1.66341	0.732647	0.0191274	0.652672	0.00914592	0.171182	0.0218885	1.03311	0.00562534		0.0863889	0.0473385	0.0816431	0.0843384	0.0527613	0.0349285	0.0461321	0.0482722	0.0503622	0.0339865	0.0436284	0.0457186
	P140 - GG	2019-11-01	SM	GG6255	8.16069	1.65032	23.3492	13.2547	32.3997	44.5724	15.1086	46.4428	0.154534		0.930055	0.696677	0.426581	0.471451	0.913996	0.692763	0.422599	0.467241	0.53606	0.579033	0.308714	0.346626
		2019-11-08	SM	GG6235	14.8643	18.1547	6.49936	11.3809	0.022308	11.3496	4.03851	24.8075	0.0488376		0.353887	1.03013	0.178474	0.254391	0.346724	1.01878	0.173567	0.248818	0.190533	0.782763	0.07837	0.139305
		2019-11-27	SM	GG6228	18.3434	2.96715	39.6991	14.9021	2.51458	32.4045	8.65317	27.7509	0.104478		0.441248	0.754052	0.159549	0.214659	0.432911	0.750141	0.157926	0.212823	0.24256	0.638311	0.11282	0.161486
		2019-12-02	SM	GG6233	9.7037	21.3835	4.09483	16.7792	0.0085151	7.77503	3.73361	25.4485	0.0645804		0.425968	1.23831	0.205401	0.288873	0.418406	1.22636	0.200284	0.283095	0.246088	0.970978	0.097455	0.165749
		2019-12-04	SM	GG6238	1.133	3.77691	25.3617	22.6722	5.16695	34.2385	7.55679	32.4251	0.138316		0.660718	0.727247	0.198876	0.237279	0.650546	0.724826	0.197624	0.23588	0.398696	0.652094	0.160652	0.194425
		mean			10.441	9.58652	19.8008	15.7978	8.0224	26.068	7.81813	31.375	0.102149		0.562375	0.889285	0.233776	0.293331	0.552517	0.882573	0.2304	0.289572	0.322788	0.724636	0.151602	0.201518
		SD			6.60296	9.39592	14.689	4.33011	13.7928	15.816	4.60665	8.93773	0.0455827		0.235375	0.236274	0.109276	0.103192	0.231797	0.231945	0.108862	0.102521	0.142353	0.156507	0.0929581	0.0834551
		SEM			2.95293	4.20198	6.5691	1.93648	6.16833	7.07314	2.06016	3.99708	0.0203852		0.105263	0.105665	0.0488697	0.0461486	0.103663	0.103729	0.0486848	0.0458489	0.0636622	0.0699921	0.0415721	0.0373223
	P168 - Wt	2020-07-17	SM	WT160	24.0823	6.22737	0.430573	12.0344	0.0190845	4.20244	0.726196	40.3344	0.0691368		1.63612	1.91252	0.940155	1.16983	0.982074	1.44065	0.523894	0.710627	0.938177	1.40769	0.496428	0.680091
		2020-08-24	SM	WT249	34.983	3.50486	0.368231	11.1289	0.114173	0.629937	1.07924	35.9235	0.0749699		2.25097	3.52182	1.49033	1.78601	1.33478	2.42053	0.807087	1.04512	1.27202	2.34312	0.761434	0.995329
		2020-08-25	SM	WT257	28.84	7.08496	0.210161	11.4538	0.068273	1.20064	0.979287	37.1321	0.0664131		1.72079	2.40392	1.09634	1.34139	1.01231	1.65432	0.577268	0.775169	0.964602	1.60265	0.543462	0.738037
		2020-09-03	SM	WT269	23.6568	17.0109	2.33732e-14	16.3567	0.0542726	1.24549	0.991052	33.9595	0.0640602		1.72398	2.69348	1.06313	1.32946	1.05409	1.85384	0.580235	0.797579	1.0089	1.79672	0.549199	0.763141
		2020-09-04	SM	WT268	29.4135	11.8445	0.102924	13.8939	0.0708928	1.16055	1.06314	33.2146	0.0581167		1.97773	3.02319	1.21288	1.49116	1.18671	2.0565	0.655433	0.87952	1.13312	1.98991	0.619136	0.839409
		mean			28.1951	9.13452	0.222378	12.9735	0.0653392	1.68781	0.967783	36.1128	0.0665393		1.86192	2.71099	1.16057	1.42357	1.11399	1.88517	0.628783	0.841603	1.06336	1.82802	0.593932	0.803201
		SD			4.62296	5.33214	0.179227	2.17297	0.0342278	1.42771	0.14191	2.82546	0.00622342		0.252341	0.609726	0.208374	0.23234	0.146084	0.376776	0.11013	0.128805	0.138559	0.360549	0.103377	0.121688
		SEM			2.06745	2.38461	0.0801526	0.971784	0.0153071	0.638492	0.0634643	1.26358	0.0027832		0.11285	0.272678	0.0931878	0.103906	0.0653309	0.168499	0.0492518	0.0576031	0.0619653	0.161242	0.0462318	0.0544204
	P168 - GG	2019-12-31	SM	GG6245	5.11556e-06	6.36088	210.773	1.86599e-07	0.00023675	1596.34	2.22045e-14	47.3762	0.533232		1.6588	8.15119	1.65998	1.73627	1.65687	8.15053	1.65932	1.73528	1.60524	8.13272	1.64151	1.70856
		2020-01-21	SM	GG6269	21.9041	181.997	44.8573	89.769	2.23664e-14	13.293	326.551	55.7915	0.111447		3.11896	1.59465	1.26947	1.32646	3.09068	1.58887	1.25705	1.31393	1.905	1.345	0.735263	0.78763
		2020-02-17	SM	GG6294	26.6086	0.542258	31.8926	1.2077	31.8029	0.107857	60.5914	44.0368	0.122961		1.4755	1.02153	0.673206	0.724447	1.44728	1.00909	0.661412	0.712445	0.735801	0.67673	0.349322	0.394714
		2020-08-21	SM	GG251	4.55394e-06	714.438	153.108	243.439	77.6095	916.694	7.01019e-12	35.6283	0.0959017		1.38508	6.80276	0.906371	1.03653	1.371	6.8021	0.905706	1.03554	1.07378	6.78207	0.88568	1.0055
		2020-08-22	SM	GG259	1.44642e-12	0.108815	32.35	44.3226	6.32802	50.8848	4.55396	31.9141	0.137768		0.918817	0.87508	0.243207	0.299568	0.904427	0.872645	0.242053	0.298236	0.548334	0.796504	0.206489	0.257035
		mean			9.70254	180.69	94.5961	75.7477	23.1481	515.463	78.3393	42.9494	0.200262		1.71143	3.68904	0.950447	1.02466	1.69405	3.68465	0.945108	1.01909	1.17363	3.5466	0.763653	0.830688
		SD			13.3895	308.36	82.4635	100.745	33.1494	718.135	141.105	9.50098	0.186768		0.832815	3.50095	0.544107	0.550795	0.827756	3.50431	0.543997	0.550861	0.573115	3.61064	0.563123	0.574941
		SEM			5.98795	137.903	36.8788	45.0547	14.8248	321.16	63.1041	4.24897	0.0835252		0.372446	1.56567	0.243332	0.246323	0.370184	1.56718	0.243283	0.246353	0.256305	1.61473	0.251836	0.257121
	P168+Lona 68d	2020-10-20	SM	GG318	60.7052	1.92401	27.1257	0.0396899	43.2278	0.702634	34.479	45.094	0.0580749		1.29335	1.24242	0.528205	0.632562	1.24775	1.23068	0.515933	0.619989	0.357476	0.884451	0.162372	0.257259
		2020-10-21	SM	GG316	2.22131e-14	563.654	32.6883	158.587	64.4209	65.4141	94.8051	49.3165	0.0756814		2.28597	5.00958	0.637828	0.772802	2.25969	5.0048	0.631613	0.766442	1.58294	4.87588	0.465076	0.5959
		2020-10-22	SM	GG314	0.000228517	582.212	48.3041	0.000682886	16.8504	1980.01	5.70845e-07	61.633	0.635129		4.69279	9.73639	1.53814	1.74732	4.6898	9.73606	1.53781	1.74683	4.60935	9.72711	1.52886	1.7334
		2020-10-23	SM	GG340	35.3911	21.4067	17.5244	0.408084	18.1636	2.88076	22.3222	37.9248	0.0631464		0.907212	1.12934	0.277895	0.35494	0.880849	1.12371	0.273809	0.350679	0.308826	0.939257	0.143132	0.214125
		mean			24.0241	292.299	31.4106	39.7589	35.6657	512.253	37.9016	48.4921	0.208008		2.29483	4.27943	0.745517	0.876907	2.26952	4.27381	0.739791	0.870984	1.71465	4.10667	0.574859	0.70017
		SD			29.603	324.234	12.8868	79.219	22.6891	978.967	40.5338	9.9428	0.284844		1.70086	4.0603	0.549468	0.6057	1.71564	4.06425	0.552506	0.608754	2.01783	4.18713	0.652865	0.709657
		SEM			14.8015	162.117	6.44341	39.6095	11.3445	489.483	20.2669	4.9714	0.142422		0.850429	2.03015	0.274734	0.30285	0.857821	2.03212	0.276253	0.304377	1.00892	2.09357	0.326433	0.354829
	P168+Lona 147d	2021-01-28	ABR	GG469	13.1921	8.86677	11.1568	0.0272865	18.2433	67.26	0.620081	50.8558	0.0883219		0.519391	1.13429	0.185204	0.267794	0.50576	1.13299	0.183554	0.265778	0.299816	1.09588	0.138835	0.210197
		2021-01-29	ABR	GG431	52.1453	38.4504	77.0507	6.50131	2.24959e-14	0.435708	67.4302	55.1213	0.0921088		1.12693	0.741164	0.374095	0.4449	1.09324	0.735841	0.361339	0.431974	0.356686	0.616595	0.0805323	0.147215
		2021-01-29	ABR	GG459	2.23133e-14	10.0578	4.73406	2.89901	241.812	108.656	13.2816	56.1779	0.10063		1.21149	0.659749	0.493118	0.539906	1.18372	0.656905	0.488645	0.535179	0.684632	0.571007	0.356026	0.394656
		2021-01-30	ABR	GG449	15.3028	11.7335	15.3274	1.86609	8.85735	33.0655	4.86998	51.0545	0.144323		0.767836	0.639567	0.261238	0.316931	0.754041	0.637463	0.257955	0.313406	0.429902	0.57884	0.16915	0.217678
		2021-02-01	ABR	GG446	36.3133	0.817344	21.9911	0.00256659	43.4687	2.47236	17.8927	50.4302	0.0849587		1.10332	0.82837	0.46197	0.535481	1.07186	0.822447	0.453274	0.526518	0.426016	0.647647	0.202257	0.267438
		mean			23.3907	13.9852	26.052	2.25925	62.4763	42.3779	20.8189	52.728	0.102069		0.945793	0.800629	0.355125	0.421002	0.921724	0.797128	0.348953	0.414571	0.43941	0.701994	0.18936	0.247437
		SD			20.6783	14.3059	29.192	2.6755	101.56	45.9625	26.9275	2.70258	0.0243331		0.292279	0.200889	0.130868	0.124618	0.283612	0.201465	0.128635	0.122224	0.147253	0.222328	0.103379	0.0927229
		SEM			9.24762	6.39777	13.0551	1.19652	45.4189	20.555	12.0423	1.20863	0.0108821		0.130711	0.0898404	0.058526	0.0557306	0.126835	0.090098	0.0575272	0.0546602	0.0658534	0.099428	0.0462324	0.041467
	P140+Lona 40d	2020-09-22	SM	GG327	29.1937	1.22434	8.86812	6.99977	3.37251	3.16847	6.8261	38.4837	0.0688338		0.556992	1.0424	0.252225	0.333862	0.544228	1.03496	0.247295	0.328584	0.256953	0.837839	0.121691	0.193546
		2020-09-23	SM	GG333	35.8075	0.134792	14.9869	11.1122	31.3017	0.985305	22.7892	40.7865	0.0969721		1.49691	1.01849	0.421789	0.498568	1.46605	1.01132	0.417204	0.493803	0.72039	0.792071	0.278809	0.349833
		2020-09-24	SM	GG336	28.3629	2.04328	9.56386	5.03881	11.1519	0.764246	19.8147	42.315	0.0791461		1.04729	1.2581	0.558016	0.634397	1.02616	1.24542	0.547949	0.623981	0.519992	0.914466	0.290109	0.356836
		2020-09-25	SM	GG345	30.7837	0.551719	11.8882	9.57037	4.5094	1.01627	12.2694	33.3957	0.0705375		0.71997	0.981672	0.254273	0.326239	0.704077	0.972564	0.249965	0.321665	0.334097	0.718982	0.133692	0.197809
		mean			31.037	0.988534	11.3268	8.18028	12.5839	1.48357	15.4249	38.7452	0.0788724		0.955292	1.07516	0.371576	0.448267	0.93513	1.06607	0.365603	0.442008	0.457858	0.81584	0.206075	0.274506
		SD			3.33521	0.834222	2.7607	2.6951	12.9416	1.12886	7.2434	3.89855	0.012883		0.414664	0.124486	0.147519	0.14737	0.406758	0.122304	0.145238	0.14508	0.206933	0.0819703	0.0907596	0.0910845
		SEM			1.66761	0.417111	1.38035	1.34755	6.47079	0.564429	3.6217	1.94927	0.00644152		0.207332	0.062243	0.0737597	0.0736851	0.203379	0.0611518	0.0726188	0.0725399	0.103466	0.0409852	0.0453798	0.0455423
	P168+Rapa HD 68d	2021-02-02	SM	GG489	24.2188	0.348481	14.5296	12.8834	6.38259	1.5095	15.2579	42.0518	0.0601089		1.13463	1.03921	0.505014	0.571037	1.115	1.02897	0.496771	0.562458	0.620947	0.756451	0.281674	0.338248
		2021-02-10	SM	GG501	51.8469	5.43299	22.8577	0.581664	35.3728	1.60855	41.117	46.951	0.0630864		1.33805	0.978211	0.578481	0.66705	1.30318	0.967453	0.565763	0.654037	0.536867	0.691497	0.245058	0.325596
		mean			38.0328	2.89073	18.6936	6.73252	20.8777	1.55903	28.1875	44.5014	0.0615977		1.23634	1.00871	0.541747	0.619043	1.20909	0.998211	0.531267	0.608248	0.578907	0.723974	0.263366	0.331922
		SD			19.536	3.59529	5.88881	8.69863	20.4992	0.0700371	18.2852	3.46425	0.00210536		0.143837	0.0431292	0.0519493	0.0678909	0.133063	0.0434983	0.0487847	0.0647562	0.059454	0.0459294	0.025891	0.00894634
		SEM			13.814	2.54225	4.16402	6.15086	14.4951	0.0495237	12.9296	2.44959	0.00148871		0.101708	0.030497	0.0367337	0.0480061	0.0940895	0.0307579	0.034496	0.0457896	0.0420403	0.032477	0.0183077	0.00632601
	P168+Lona 147d + Rapa LD 68d	2021-04-26	SM	GG680	18.3995	1.79955	12.1456	4.27048e-11	0.000130357	21.7559	46.9635	59.2202	0.0890087		1.467	0.824032	0.626685	0.681288	1.44617	0.819739	0.617873	0.672276	0.909566	0.707162	0.389317	0.438374
		2021-04-26	SM	GG681	6.27886e-07	4.22929	6.17516	1.20667e-10	1.73623e-09	224.3	2.22045e-14	55.2729	0.244895		0.548886	0.77133	0.306719	0.365256	0.545008	0.770487	0.305877	0.363992	0.445901	0.747896	0.283285	0.330105
		2021-04-27	SM	GG666	13.0114	5.2141	8.87141	5.29283e-09	1.40835e-08	101.988	123.684	61.5736	0.144773		2.24751	0.995308	0.906922	0.960654	2.21658	0.989865	0.894648	0.948174	1.48896	0.860326	0.604706	0.653202
		2021-04-27	SM	GG667	17.127	22.5959	13.2515	4.92319	164.319	26.0746	77.1425	55.7103	0.0838263		1.89399	1.27577	0.874917	0.939991	1.87283	1.27079	0.86607	0.930975	1.19561	1.10368	0.571912	0.631046
		2021-04-27	SM	GG671	2.51241e-06	6.78556	10.7905	0.0196373	171.422	16.6587	190.488	59.7372	0.152438		4.10104	1.50444	1.84175	1.88279	4.03831	1.4914	1.81408	1.85483	2.79465	1.23097	1.26401	1.29878
		mean			9.70757	8.12489	10.2468	0.988565	67.1482	78.1554	87.6557	58.3028	0.142988		2.05169	1.07418	0.911398	0.965996	2.02378	1.06846	0.89971	0.95405	1.36694	0.930007	0.622645	0.670302
		SD			9.08276	8.2895	2.80176	2.19954	91.9807	88.8839	73.0112	2.71563	0.0649836		1.3099	0.310756	0.573061	0.566384	1.28828	0.306855	0.563318	0.556674	0.886016	0.228266	0.382049	0.37628
		SEM			4.06193	3.70718	1.25299	0.983663	41.135	39.7501	32.6516	1.21447	0.0290615		0.585804	0.138974	0.256281	0.253295	0.576137	0.13723	0.251923	0.248952	0.396238	0.102084	0.170858	0.168278

## Sheet: SMA2
SMA2	Structural Properties
	Type	Date	Personnel	Mouse #	Unloaded Configuration			In-vivo Loaded Configuration @ Sys								In-vivo Loaded Configuration @ Fixed								In-vivo Loaded Configuration @ Low fixed								Distensibility					irsys (μm)	irLow fixed (μm)	irFixed (μm)	h*Cttt	PVW B-H	PVW M-K	PVW M-K
					L (mm)	OD (μm)	H (μm)	Piv (mmHg)	od (μm)	h (μm)	λziv	λϑ	W (kPa)	σz (kPa)	σϑ (kPa)	Piv (mmHg)	od (μm)	h (μm)	λziv	λϑ	W (kPa)	σz (kPa)	σϑ (kPa)	Piv (mmHg)	od (μm)	h (μm)	λziv	λϑ	W (kPa)	σz (kPa)	σϑ (kPa)	Psys (mmHg)	idsys (μm)	Pdia (mmHg)	iddia (μm)	D (mmHg-1)
	P42 - Wt	2020-10-07	SM	WT498	4.21	191.24	42.9939	67.9961	207.258	16.3596	2.04087	1.28771	33.1128	157.595	48.3578	60.0036	203.267	16.7433	2.04087	1.2582	32.0842	150.723	40.5591	51.0808	197.634	17.3199	2.04087	1.21631	30.8593	143.262	32.0441	67.9961	174.538	51.0808	162.994	31.4068	87.2692	81.4969	84.8901	6.18786		5.95422	5.38408
		2020-10-08	SM	WT503	3.48	193.056	45.947	67.9985	174.844	21.4777	2.052	1.04254	29.8387	166.608	27.8346	60.006	172.351	21.8929	2.052	1.02277	29.3415	162.189	23.4899	51.0831	169.085	22.4661	2.052	0.996671	28.801	157.372	18.818	67.9985	131.889	51.0831	124.153	27.6285	65.9445	62.0766	64.2828	5.35144		6.36988	5.88873
		2020-10-12	SM	WT519	2.92	184.221	49.3892	67.9956	199.221	19.7567	1.87816	1.33103	16.3843	116.261	36.6403	60.0035	194.974	20.2983	1.87816	1.29551	15.4627	110.992	30.4206	51.0811	189.552	21.0408	1.87816	1.24979	14.4968	105.526	23.8655	67.9956	159.708	51.0811	147.471	36.7967	79.8539	73.7354	77.1888	5.02323		5.60826	5.214
		2021-06-14	SM	m1	2.54	222.554	43.5717	68.0022	250.206	18.7613	1.79599	1.29312	18.949	129.844	51.3877	60.0063	247.591	18.9951	1.79599	1.2772	18.3593	119.601	44.1382	51.0854	243.755	19.3499	1.79599	1.25378	17.6213	108.572	36.0873	68.0022	212.684	51.0854	205.055	16.4948	106.342	102.528	104.801	12.3513		7.62061	6.8081
		2021-06-15	SM	m2	4.16	161.133	41.9809	67.9989	172.671	19.1044	1.705	1.28883	11.0156	69.344	31.9033	60.0058	170.203	19.4626	1.705	1.26511	10.4706	63.4935	26.9804	51.0822	166.564	20.0198	1.705	1.22989	9.79074	57.1194	21.5204	67.9989	134.462	51.0822	126.525	27.8171	67.2312	63.2623	65.6388	5.70485		6.51361	5.81418
		mean			3.462	190.441	44.7765	67.9982	200.84	19.0919	1.8944	1.24864	21.8601	127.93	39.2247	60.0051	197.677	19.4784	1.8944	1.22376	21.1437	121.4	33.1176	51.0825	193.318	20.0393	1.8944	1.18929	20.3138	114.37	26.467	67.9982	162.656	51.0825	153.239	28.0288	81.3281	76.6197	79.3602	6.92374	#DIV/0!	6.41332	5.82182
		SD			0.740081	22.0021	2.96193	0.00265065	31.4248	1.85126	0.15175	0.116604	9.30515	38.5619	10.2636	0.00135329	31.3298	1.88523	0.15175	0.113245	9.23091	38.692	8.86653	0.00184095	31.1435	1.92113	0.15175	0.108744	9.15236	38.9658	7.30411	0.00265065	33.1441	0.00184095	33.0643	7.44186	16.5721	16.5321	16.5689	3.06472	#DIV/0!	0.762953	0.620149
		SEM			0.330974	9.83964	1.32462	0.00118541	14.0536	0.827909	0.0678646	0.0521467	4.16139	17.2454	4.59004	0.000605211	14.0111	0.843098	0.0678646	0.0506447	4.12819	17.3036	3.96523	0.000823298	13.9278	0.859157	0.0678646	0.0486317	4.09306	17.426	3.2665	0.00118541	14.8225	0.000823298	14.7868	3.3281	7.41125	7.39339	7.40984	1.37058	#DIV/0!	0.341203	0.277339
	P42 -GG	2020-03-09	SM	GG163	2.1	189.6	39.0722	54.5045	215.551	20.5729	1.46624	1.29529	7.51	34.0551	30.8007	60.0039	218.646	20.2149	1.46624	1.31824	8.08864	35.8417	35.2632	38.0499	202.198	22.297	1.46624	1.19513	5.6125	28.9928	17.9283	54.5045	174.405	38.0499	157.604	48.5932	87.2024	78.802	89.1081	4.64539		5.16098	5.58991
		2020-03-10	SM	GG167	2.76	220.086	48.1716	54.5037	268.207	20.4635	1.63351	1.44109	11.5617	56.4502	40.3526	60.0054	272.29	20.1029	1.63351	1.46693	12.3291	61.7392	46.1788	38.0492	248.936	22.377	1.63351	1.31786	8.83391	42.0901	23.1433	54.5037	227.28	38.0492	204.182	51.5672	113.64	102.091	116.042	5.9656		5.12326	5.5899
		2020-03-11	SM	GG166	3.05	164.098	40.9808	54.5054	171.648	16.8935	1.92991	1.25696	17.963	110.128	29.65	60.0049	174.078	16.6015	1.92991	1.27908	18.5162	114.483	33.942	38.0501	160.756	18.3596	1.92991	1.15659	16.0854	97.6452	17.136	54.5054	137.861	38.0501	124.037	50.7999	68.9303	62.0185	70.4374	3.71898		5.19388	5.6324
		2021-04-29	SM	GG868	2.62	209.633	51.4776	54.5071	215.9	28.4702	1.52571	1.1851	4.3217	26.1932	20.2868	60.0085	217.971	28.1048	1.52571	1.2005	4.60101	27.0751	23.0235	38.0517	208.31	29.9114	1.52571	1.128	3.52523	23.71	12.592	54.5071	158.959	38.0517	148.488	32.1447	79.4796	74.2439	80.8807	5.62745		5.94995	6.27927
		2021-04-29	SM	GG879	2.18	207.209	50.8732	54.5065	190.226	24.7775	1.94011	1.05829	18.0251	184.356	20.6282	60.0062	192.211	24.4336	1.94011	1.07319	18.3437	186.272	23.4668	38.052	183.132	26.1068	1.94011	1.00441	17.1765	178.926	12.7201	54.5065	140.671	38.052	130.918	33.9599	70.3357	65.459	71.6721	4.70687		5.78447	6.08077
		mean			2.542	198.125	46.1151	54.5054	212.306	22.2355	1.69909	1.24735	11.8763	82.2364	28.3437	60.0058	215.039	21.8915	1.69909	1.26759	12.3757	85.0822	32.3749	38.0506	200.666	23.8104	1.69909	1.1604	10.2467	74.2728	16.7039	54.5054	167.835	38.0506	153.046	43.413	83.9176	76.5228	85.6281	4.93286	#DIV/0!	5.44251	5.83445
		SD			0.3994	21.9531	5.7356	0.00142739	36.3626	4.46583	0.223576	0.141017	6.14596	65.8284	8.31264	0.00173033	37.075	4.44585	0.223576	0.14554	6.16746	66.0267	9.59359	0.00121994	32.7528	4.37469	0.223576	0.113355	6.13925	65.4622	4.35693	0.00142739	36.3729	0.00121994	31.5736	9.54239	18.1865	15.7868	18.6091	0.888288	#DIV/0!	0.392881	0.323642
		SEM			0.178617	9.81772	2.56504	0.000638347	16.2619	1.99718	0.0999864	0.0630645	2.74855	29.4394	3.71752	0.000773829	16.5804	1.98824	0.0999864	0.0650875	2.75817	29.528	4.29038	0.000545574	14.6475	1.95642	0.0999864	0.0506938	2.74556	29.2756	1.94848	0.000638347	16.2665	0.000545574	14.1202	4.26749	8.13323	7.06008	8.32223	0.397255	#DIV/0!	0.175702	0.144737
	P100 - Wt	2018-10-16	SM	P157 M	3.2	212.346	48.714	75.606	246.051	19.4275	1.81051	1.38496	21.3604	144.035	53.7509	60.0041	239.538	20.06	1.81051	1.34129	19.879	122.535	39.7629	58.8039	238.918	20.1226	1.81051	1.33712	19.7568	120.927	38.7013	75.606	207.196	58.8039	198.673	19.152	103.598	99.3363	99.7089	10.5064		7.12091	5.89061
		2018-10-24	SM	P162 M	3.74	218.826	42.887	75.607	262.312	17.4789	1.7632	1.39158	22.0528	129.642	65.5566	60.0044	256.706	17.9217	1.7632	1.3572	20.633	112.824	49.2935	58.8042	256.145	17.9674	1.7632	1.35375	20.5092	111.541	48.0425	75.607	227.354	58.8042	220.21	14.4827	113.677	110.105	110.431	14.4112		7.96157	6.35909
		2019-01-28	SM	P210 F	3.4	194.008	38.432	75.6107	215.341	17.6879	1.71023	1.27046	16.863	127.646	51.2815	60.0054	210.707	18.1567	1.71023	1.23766	15.7035	107.32	38.4192	58.8051	210.249	18.2045	1.71023	1.23441	15.6037	105.805	37.4325	75.6107	179.965	58.8051	173.839	15.7272	89.9826	86.9197	87.1967	10.9429		7.7978	6.26681
		2018-02-09	SM	Jejunal	3.05	155.54	38.2732	75.6089	253.601	11.2439	1.64702	2.06672	19.6452	96.0222	103.597	60.0066	249.079	11.4685	1.64702	2.02624	17.8563	80.1749	78.875	58.8057	248.657	11.4899	1.64702	2.02246	17.7108	79.0043	76.9938	75.6089	231.113	58.8057	225.677	10.7524	115.557	112.839	113.071	16.997		8.57579	7.20947
		2018-04-13	SM	Jejunal	2.58	143.618	45.7565	75.6058	227.336	11.1751	1.85369	2.20884	34.4003	220.627	92.4468	60.0042	220.899	11.5381	1.85369	2.13936	31.8534	192.049	68.5788	58.804	220.298	11.5732	1.85369	2.13285	31.6474	189.904	66.7754	75.6058	204.985	58.804	197.151	17.7393	102.493	98.5756	98.9113	10.2389		7.06751	5.93245
		mean			3.194	184.868	42.8125	75.6077	240.928	15.4027	1.75693	1.66451	22.8643	143.594	73.3266	60.0049	235.386	15.829	1.75693	1.62035	21.185	122.981	54.9859	58.8046	234.853	15.8715	1.75693	1.61612	21.0456	121.436	53.5891	75.6077	210.123	58.8046	203.11	15.5707	105.061	101.555	101.864	12.6193	#DIV/0!	7.70471	6.33169
		SD			0.429628	33.7395	4.56328	0.00209427	19.2587	3.90194	0.0814447	0.437601	6.75237	46.4927	23.5131	0.00107789	19.2237	4.03502	0.0814447	0.426523	6.26404	41.6874	17.9865	0.000776909	19.2201	4.04911	0.0814447	0.425591	6.22661	41.3244	17.572	0.00209427	20.5059	0.000776909	20.6981	3.23856	10.253	10.3491	10.3378	2.97138	#DIV/0!	0.628543	0.531366
		SEM			0.192135	15.0888	2.04076	0.000936588	8.61274	1.745	0.0364232	0.195701	3.01975	20.7922	10.5154	0.000482049	8.59711	1.80452	0.0364232	0.190747	2.80136	18.6432	8.0438	0.000347444	8.59549	1.81082	0.0364232	0.19033	2.78462	18.4808	7.85845	0.000936588	9.17054	0.000347444	9.25649	1.44833	4.58527	4.62825	4.62322	1.32884	#DIV/0!	0.281093	0.237634
	P100 - GG	2020-02-26	SM	GG75	3.5	172.541	43.4587	60.6054	186.29	19.4328	1.73006	1.29265	13.9299	98.7643	30.6487	60.0053	186.063	19.4628	1.73006	1.29065	13.8829	98.2424	30.2393	43.8032	178.149	20.5781	1.73006	1.2207	12.5298	84.4943	19.4386	60.6054	147.425	43.8032	136.993	33.993	73.7125	68.4966	73.5687	5.15201		5.91157	5.86575
		2020-02-28	SM	GG86	3.96	193.493	42.3367	60.6047	227.76	18.1126	1.68528	1.38696	15.7185	86.8742	42.7207	60.0046	227.496	18.1376	1.68528	1.38505	15.66	86.4353	42.1703	43.8023	217.251	19.1702	1.68528	1.31044	13.7917	74.5588	27.2504	60.6047	191.535	43.8023	178.911	31.4978	95.7674	89.4555	95.6106	7.24398		6.14985	6.09057
		2020-03-02	SM	GG84	2.74	227.96	55.0455	60.6035	272.41	22.1149	1.71956	1.44751	19.6012	90.7753	41.6827	60.0036	272.024	22.1523	1.71956	1.44506	19.5312	90.2469	41.1173	43.8016	256.02	23.8404	1.71956	1.34274	17.1697	76.1745	25.5161	60.6035	228.18	43.8016	208.339	42.5135	114.09	104.169	113.86	7.40892		5.69822	5.63819
		2018-11-14	SM	P176 F	3.96	199.798	27.882	60.6054	177.363	16.7419	1.78251	0.934302	17.9184	141.167	34.7192	60.0054	177.139	16.768	1.78251	0.932847	17.8599	140.563	34.2561	43.8045	170.48	17.5883	1.78251	0.889341	16.5277	125.157	22.4631	60.6054	143.879	43.8045	135.304	28.2966	71.9397	67.6518	71.8016	4.80611		5.7796	5.75144
		2018-11-15	SM	P178 M	5.09	200.995	32.209	60.6074	222.232	15.2585	1.72142	1.22625	13.3947	118.293	50.7614	60.0082	222.052	15.2729	1.72142	1.2251	13.3474	117.316	50.1579	43.8059	215.795	15.7901	1.72142	1.18496	11.9701	91.5381	34.0672	60.6074	191.715	43.8059	184.215	18.175	95.8574	92.1075	95.7533	9.82809		7.15989	7.10525
		mean			3.85	198.957	40.1864	60.6053	217.211	18.3321	1.72777	1.25753	16.1125	107.175	40.1065	60.0054	216.955	18.3587	1.72777	1.25574	16.0563	106.561	39.5882	43.8035	207.539	19.3934	1.72777	1.18964	14.3978	90.3846	25.7471	60.6053	180.547	43.8035	168.752	30.8952	90.2734	84.3762	90.1188	6.88782	#DIV/0!	6.13983	6.09024
		SD			0.853874	19.8349	10.6203	0.00140656	37.8394	2.62414	0.0350516	0.199706	2.63334	22.5327	7.76721	0.00172215	37.78	2.63211	0.0350516	0.199362	2.62428	22.4286	7.69022	0.00169869	34.4601	3.06065	0.0350516	0.179721	2.34363	20.6006	5.52538	0.00140656	35.1991	0.00169869	31.7681	8.85299	17.5996	15.8841	17.5711	2.02424	#DIV/0!	0.595299	0.591561
		SEM			0.381864	8.87044	4.74953	0.000629035	16.9223	1.17355	0.0156755	0.0893114	1.17767	10.0769	3.4736	0.00077017	16.8957	1.17712	0.0156755	0.0891573	1.17361	10.0304	3.43917	0.000759679	15.411	1.36876	0.0156755	0.0803737	1.0481	9.21288	2.47102	0.000629035	15.7415	0.000759679	14.2071	3.95918	7.87077	7.10357	7.85801	0.905266	#DIV/0!	0.266226	0.264554
	P140 - Wt	2018-02-21	SM	2	5.11	176.539	42.186	75.6086	267.255	12.9943	1.71548	1.89248	22.0221	106.88	93.5797	60.0052	262.298	13.2671	1.71548	1.85356	20.3277	90.3298	71.0812	58.8051	261.825	13.2938	1.71548	1.84984	20.1866	89.1014	69.3643	75.6086	241.266	58.8051	235.237	11.4404	120.633	117.619	117.882	17.3225		8.47339	6.99554
		2018-02-26	SM	3	4.66	191.904	44.546	75.6204	283.539	14.5488	1.67733	1.82542	16.0231	85.4509	88.1589	60.0081	279.383	14.7906	1.67733	1.79557	14.75	71.1619	67.5592	58.8097	278.999	14.8134	1.67733	1.79281	14.6472	70.0888	65.9944	75.6204	254.442	58.8097	249.372	9.07095	127.221	124.686	124.901	21.7904		9.25419	7.81869
		2018-03-05	SM	4	4.53	174	39.717	75.6059	253.441	13.3049	1.66928	1.78828	21.7501	112.208	85.9235	60.004	247.021	13.6931	1.66928	1.73758	19.6143	93.7631	64.157	58.8039	246.412	13.7311	1.66928	1.73277	19.4387	92.4175	62.5043	75.6059	226.831	58.8039	218.95	16.0678	113.415	109.475	109.817	12.4324		7.40331	6.14924
		2018-10-15	SM	WTM3	2.58	185.543	45.098	75.6179	306.189	12.2436	1.75989	2.09296	24.5228	154.177	115.976	60.0171	302.458	12.4081	1.75989	2.06522	23.164	126.098	89.5198	58.8143	302.099	12.4241	1.75989	2.06255	23.0497	124.014	87.4893	75.6179	281.702	58.8143	277.251	7.16637	140.851	138.625	138.821	29.7658		10.2793	8.46057
		2018-10-17	SM	WTM4	4.18	175.243	45.941	75.6034	272.952	13.3481	1.71426	2.00774	23.4394	104.251	92.9771	60.0024	262	13.971	1.71426	1.91821	19.8343	83.9286	67.0085	58.8023	260.982	14.032	1.71426	1.90987	19.5464	82.5054	65.0642	75.6034	246.256	58.8023	232.918	25.5657	123.128	116.459	117.029	9.44415		6.19281	5.20771
		mean			4.212	180.646	43.4976	75.6112	276.675	13.2879	1.70725	1.92138	21.5515	112.593	95.3231	60.0074	270.632	13.626	1.70725	1.87403	19.5381	93.0563	71.8651	58.8071	270.063	13.6589	1.70725	1.86957	19.3737	91.6254	70.0833	75.6112	250.099	58.8071	242.746	13.8622	125.05	121.373	121.69	18.151	#DIV/0!	8.3206	6.92635
		SD			0.971169	7.76132	2.53199	0.00749984	19.7525	0.832227	0.0361404	0.127137	3.28699	25.3393	11.9873	0.00584427	21.1596	0.879188	0.0361404	0.126192	3.03274	20.3861	10.1716	0.00490766	21.3064	0.885326	0.0361404	0.126355	3.02272	20.0189	10.0354	0.00749984	20.3212	0.00490766	22.1004	7.3398	10.1606	11.0502	10.9654	8.02102	#DIV/0!	1.58906	1.29543
		SEM			0.43432	3.47097	1.13234	0.00335403	8.8336	0.372183	0.0161625	0.0568576	1.46999	11.3321	5.36086	0.00261364	9.46284	0.393185	0.0161625	0.0564348	1.35628	9.11696	4.54888	0.00219477	9.52849	0.39593	0.0161625	0.0565075	1.3518	8.95272	4.48796	0.00335403	9.08791	0.00219477	9.88358	3.28246	4.54396	4.94179	4.90387	3.58711	#DIV/0!	0.710647	0.579333
	P140 - GG	2019-11-02	SM	GG6253	11.5	222.899	34.3009	60.606	237.273	27.0466	1.13774	1.11468	3.00236	37.7465	27.3618	60.006	237.07	27.0766	1.13774	1.11344	2.97226	37.2231	27.0221	43.8037	229.703	28.2203	1.13774	1.06832	2.06066	25.9918	17.9275	60.606	183.179	43.8037	173.262	25.5507	91.5897	86.6312	91.4584	7.20416		6.27124	6.19115
		2019-11-08	SM	GG6235	3.92	223.361	40.8732	60.602	236.092	19.578	1.75962	1.18646	15.2021	105.733	40.6358	60.002	235.494	19.6377	1.75962	1.18285	15.0794	105.412	39.965	43.8015	216.873	21.7211	1.75962	1.06939	11.9694	96.7577	23.3129	60.602	196.936	43.8015	173.43	60.5092	98.468	86.7152	98.1091	4.35351		4.70173	4.67441
		2019-11-27	SM	GG6228	5.18	247.624	47.3103	60.6145	236.154	46.7661	1.07	0.945454	1.25704	86.6535	12.3224	60.0084	118.192	23.8128	1.915	0.882186	24.1194	280.561	11.854	43.8074	114.044	25.3346	1.915	0.829193	23.5358	262.378	7.30492	60.6145	142.621	43.8074	63.3749	558.038	71.3107	31.6875	35.2831	4.05618		5.33294	5.36706
		2019-12-02	SM	GG6233	5.07	182.384	35.084	60.6036	220.905	16.1738	1.56068	1.3899	15.3895	40.445	47.0973	60.0038	220.411	16.2164	1.56068	1.38625	15.2666	40.3646	46.3657	43.801	198.731	18.358	1.56068	1.22453	10.9954	38.349	25.7679	60.6036	188.558	43.801	162.015	73.1323	94.2789	81.0076	93.9889	4.44718		4.85646	4.79647
		2019-12-04	SM	GG6238	5.08	209.975	49.7009	60.6042	228.643	24.0651	1.618	1.27643	11.7626	77.6044	30.3032	60.0079	228.358	24.1033	1.618	1.27441	11.715	77.1137	29.8976	43.8018	216.714	25.7857	1.618	1.19126	10.1288	64.1501	18.6998	60.6042	180.513	43.8018	165.142	41.5499	90.2566	82.5711	90.0758	6.11189		5.8188	5.75777
		mean			6.15	217.249	41.4539	60.6061	231.813	26.7259	1.42921	1.18258	9.32271	69.6364	31.5441	60.0056	207.905	22.1693	1.59821	1.16783	13.8305	108.135	31.0209	43.8031	195.213	23.884	1.59821	1.07654	11.738	97.5254	18.6026	60.6061	178.362	43.8031	147.445	151.756	89.1808	73.7225	81.7831	5.23459	#DIV/0!	5.39623	5.35737
		SD			3.03511	23.7718	6.97116	0.00493573	6.99961	11.9502	0.306627	0.167811	6.75143	29.6863	13.3516	0.00272202	50.5839	4.25349	0.29165	0.189632	7.61348	100.402	13.2295	0.00260569	46.6951	3.86455	0.29165	0.15521	7.68168	96.0598	7.09985	0.00493573	20.9415	0.00260569	47.2626	227.841	10.4707	23.6313	26.1732	1.36325	#DIV/0!	0.656106	0.639658
		SEM			1.35734	10.6311	3.1176	0.00220733	3.13032	5.3443	0.137128	0.0750472	3.01933	13.2761	5.97104	0.00121732	22.6218	1.90222	0.13043	0.084806	3.40485	44.901	5.91642	0.0011653	20.8827	1.72828	0.13043	0.0694119	3.43535	42.9592	3.17515	0.00220733	9.36531	0.0011653	21.1365	101.894	4.68266	10.5682	11.705	0.609665	#DIV/0!	0.293419	0.286064
	P168 - Wt	2020-07-17	SM	WT160	3.71	253.98	54.8349	75.6059	326.68	20.0867	1.77319	1.53955	21.6687	117.779	71.8866	60.0064	319.475	20.6058	1.77319	1.50076	20.0806	100.648	54.0169	58.8033	318.763	20.6587	1.77319	1.49692	19.944	99.3785	52.6432	75.6059	286.507	58.8033	277.446	14.5792	143.253	138.723	139.132	17.7543	4.91926	7.87198	6.35496
		2020-08-24	SM	WT249	2.22	219.525	49.3612	75.62	273.422	20.4561	1.62319	1.4866	13.8861	96.7944	57.2953	60.0065	268.763	20.8752	1.62319	1.45676	12.8757	79.648	43.4994	58.8054	268.296	20.9181	1.62319	1.45376	12.7873	78.3954	42.4376	75.62	232.509	58.8054	226.46	11.9158	116.255	113.23	113.506	17.6944	5.23419	8.72363	6.95186
		2020-08-25	SM	WT257	2.3	226.122	51.9837	75.605	268.858	20.7326	1.75969	1.42488	18.7162	111.077	55.2762	60.0032	260.869	21.4902	1.75969	1.37465	17.0173	95.8153	40.5539	58.8031	260.099	21.5665	1.75969	1.36979	16.8757	94.7031	39.4346	75.605	227.393	58.8031	216.966	21.4541	113.696	108.483	108.944	10.6714	4.58606	6.85051	5.61732
		2020-09-03	SM	WT269	2.72	206.074	48.7492	75.6048	268.307	17.5405	1.74362	1.59394	17.6182	84.3421	67.0114	60.0043	258.974	18.2741	1.74362	1.52995	15.2779	70.3497	48.6851	58.8038	258.074	18.3483	1.74362	1.52376	15.0834	69.3214	47.2942	75.6048	233.226	58.8038	221.378	23.8936	116.613	110.689	111.213	9.89332	5.4841	6.51302	5.35159
		2020-09-04	SM	WT268	2.32	217.294	44.8896	75.6073	271.711	16.4467	1.84342	1.48061	22.6695	136.582	73.184	60.0048	266.452	16.8177	1.84342	1.44796	21.2508	118.638	55.3733	58.8038	258.074	18.3483	1.74362	1.52376	15.0834	69.3214	47.2942	75.6073	238.818	58.8038	221.378	35.1653	119.409	110.689	116.408	16.3363	5.46944	8.27072	6.75695
		mean			2.654	224.599	49.9637	75.6086	281.796	19.0525	1.74862	1.50512	18.9117	109.315	64.9307	60.0051	274.906	19.6126	1.74862	1.46202	17.3005	93.0198	48.4257	58.8039	272.661	19.968	1.72866	1.4736	15.9548	82.224	45.8207	75.6086	243.691	58.8039	232.725	21.4016	121.845	116.363	117.841	14.4699	5.13861	7.64597	6.20653
		SD			0.621434	17.9433	3.72134	0.00644191	25.1782	1.93253	0.0798001	0.0641422	3.48893	19.9913	8.25136	0.00140999	25.2314	1.98174	0.0798001	0.059109	3.43088	18.8086	6.43877	0.000926246	26.1141	1.51505	0.0602461	0.064706	2.6605	14.121	5.0773	0.00644191	24.2751	0.000926246	25.2243	9.11285	12.1376	12.6121	12.2191	3.87431	0.384506	0.937959	0.699749
		SEM			0.277914	8.02448	1.66423	0.00288091	11.26	0.864253	0.0356877	0.0286853	1.56029	8.94039	3.69012	0.000630568	11.2838	0.886262	0.0356877	0.0264343	1.53434	8.41146	2.8795	0.00041423	11.6786	0.677549	0.0269429	0.0289374	1.18981	6.31512	2.27064	0.00288091	10.8562	0.00041423	11.2806	4.07539	5.42808	5.64032	5.46455	1.73265	0.171957	0.419468	0.312937
	P168 - GG	2019-12-31	SM	GG6245	3.7	241.805	68.13	60.6057	257.019	40.1519	1.35886	1.24869	3.82934	23.7233	17.7806	60.0058	256.805	40.2005	1.35886	1.24719	3.808	23.6802	17.5524	43.8033	249.202	42.031	1.35886	1.19287	3.17608	22.3074	11.4724	60.6057	176.715	43.8033	165.14	31.2881	88.3574	82.57	88.2022	7.50531	6.39694	6.517	6.46164
		2020-01-21	SM	GG6269	4.58	222.761	57.8635	60.6252	221.944	32.2917	1.55801	1.15012	4.10255	32.9013	19.6935	60.0145	221.82	32.3171	1.55801	1.14921	4.08714	32.7302	19.4581	43.8062	217.405	33.2568	1.55801	1.11674	3.62778	27.5682	13.249	60.6252	157.36	43.8062	150.891	19.119	78.6801	75.4456	78.5928	9.62502	7.98711	7.82084	7.75112
		2020-02-17	SM	GG6294	4.48	246.767	63.3352	60.6035	247.69	45.2175	1.26895	1.1038	1.49679	10.1326	14.0495	60.0035	247.35	45.3157	1.26895	1.10141	1.44156	10.0462	13.8329	43.8036	238.254	48.1626	1.26895	1.03631	0.778749	7.76509	8.60472	60.6035	157.255	43.8036	141.929	48.2117	78.6277	70.9646	78.3594	4.54094	7.16036	5.37366	5.36023
		2020-08-21	SM	GG251	2.28	189.988	44.1007	60.6048	211.257	21.542	1.57425	1.30042	10.6224	70.9729	31.5386	60.0046	210.995	21.5756	1.57425	1.2984	10.5735	70.6796	31.1166	43.8022	200.515	23.0259	1.57425	1.21662	8.97568	62.2281	19.5871	60.6048	168.173	43.8022	154.463	39.6215	84.0865	77.2316	83.922	5.79101	6.62624	5.86812	5.80671
		2020-08-22	SM	GG259	2.18	221.291	42.1982	60.6125	231.059	36.579	1.06235	1.08592	0.919361	27.2902	17.4414	60.0129	230.963	36.6013	1.06235	1.08526	0.908871	27.0205	17.2429	43.8106	228.03	37.2976	1.06235	1.06499	0.635113	20.3757	12.014	60.6125	157.901	43.8106	153.435	12.9929	78.9504	76.7175	78.88	11.9863	14.9322	8.71265	8.67163
		mean			3.444	224.522	55.1255	60.6104	233.794	35.1564	1.36449	1.17779	4.19408	33.0041	20.1007	60.0083	233.587	35.202	1.36449	1.17629	4.16382	32.8313	19.8406	43.8052	226.681	36.7548	1.36449	1.12551	3.43868	28.0489	12.9854	60.6104	163.481	43.8052	153.172	30.2466	81.7404	76.5859	81.5913	7.88972	8.62057	6.85846	6.81027
		SD			1.15995	22.3589	11.5399	0.00899147	18.6301	8.96888	0.213249	0.0932013	3.85562	22.8228	6.70938	0.00507252	18.6028	8.98929	0.213249	0.0929554	3.8478	22.7441	6.62136	0.00335009	18.7994	9.47352	0.213249	0.078316	3.38003	20.4434	4.06432	0.00899147	8.72509	0.00335009	8.31525	14.4329	4.36255	4.15763	4.35671	2.98161	3.58092	1.3844	1.37669
		SEM			0.518745	9.9992	5.16079	0.00402111	8.33163	4.011	0.095368	0.0416809	1.72429	10.2067	3.00053	0.0022685	8.31943	4.02013	0.095368	0.0415709	1.72079	10.1715	2.96116	0.0014982	8.40736	4.23669	0.095368	0.035024	1.51159	9.14255	1.81762	0.00402111	3.90198	0.0014982	3.71869	6.45459	1.95099	1.85935	1.94838	1.33342	1.60144	0.619121	0.615677
	P168+Lona 68d	2020-10-20	SM	GG318	3.9	221.581	50.101	60.6041	250.409	22.5886	1.66947	1.32856	12.1685	73.8101	36.7049	60.004	250.11	22.6215	1.66947	1.32662	12.1153	73.4859	36.2239	43.8026	238.761	23.9574	1.66947	1.25265	10.455	64.5889	23.2601	60.6041	205.232	43.8026	190.847	33.6504	102.616	95.4233	102.433	7.43539	5.76678	6.01907	5.96288
		2020-10-21	SM	GG316	1.82	224.22	48.698	60.6043	232.04	28.8611	1.45764	1.15757	4.52242	40.8109	24.4004	60.0042	231.756	28.9081	1.45764	1.15568	4.48296	40.6319	24.0673	43.8039	223.078	30.4404	1.45764	1.09751	3.47524	35.9589	15.5586	60.6043	174.318	43.8039	162.197	33.3628	87.1588	81.0985	86.97	5.93965	7.29119	5.83727	5.80687
		2020-10-22	SM	GG314	2.6	243.282	51.6495	60.6097	266.789	25.9024	1.58629	1.25702	11.3127	39.5227	33.5331	60.004	266.488	25.9387	1.58629	1.25526	11.266	39.4386	33.0939	43.8014	252.754	27.7282	1.58629	1.17426	9.53839	36.8221	20.7756	60.6097	214.984	43.8014	197.297	40.0036	107.492	98.6487	107.305	8.0311	6.81658	6.11201	6.03301
		2020-10-23	SM	GG340	3.42	212.191	48.908	60.6056	224.092	26.4783	1.52621	1.21025	6.9977	50.93	26.1113	60.0055	223.865	26.5136	1.52621	1.20864	6.96317	50.6987	25.7734	43.803	215.714	27.853	1.52621	1.15052	5.93858	44.3089	16.7741	60.6056	171.136	43.803	160.008	31.0444	85.5678	80.004	85.4188	6.65947	7.20185	6.23806	6.18454
		mean			2.935	225.319	49.8391	60.6059	243.333	25.9576	1.5599	1.23835	8.75032	51.2684	30.1874	60.0044	243.055	25.9955	1.5599	1.23655	8.70685	51.0638	29.7896	43.8027	232.577	27.4947	1.5599	1.16873	7.35179	45.4197	19.0921	60.6059	191.417	43.8027	177.587	34.5153	95.7087	88.7936	95.5319	7.0164	6.7691	6.0516	5.99682
		SD			0.916861	13.0409	1.3559	0.00261005	19.1312	2.58553	0.0899876	0.0725738	3.61461	15.8699	5.88148	0.00070756	19.1034	2.59092	0.0899876	0.0725269	3.60778	15.7782	5.80786	0.00105011	16.5323	2.66913	0.0899876	0.0644888	3.23706	13.3181	3.56206	0.00261005	21.9848	0.00105011	19.2371	3.84034	10.9924	9.61856	10.9822	0.911401	0.699224	0.168734	0.156826
		SEM			0.45843	6.52044	0.67795	0.00130503	9.56558	1.29277	0.0449938	0.0362869	1.80731	7.93496	2.94074	0.00035378	9.55169	1.29546	0.0449938	0.0362634	1.80389	7.88909	2.90393	0.000525057	8.26616	1.33457	0.0449938	0.0322444	1.61853	6.65906	1.78103	0.00130503	10.9924	0.000525057	9.61856	1.92017	5.4962	4.80928	5.49111	0.4557	0.349612	0.084367	0.0784131
	P168+Lona 147d	2021-01-28	SM	GG469	4.5	154.396	46.3736	60.6031	157.101	25.7127	1.48279	1.21631	5.83003	23.837	16.603	60.0029	156.664	25.8196	1.48279	1.21127	5.76187	23.7833	16.2698	43.8027	144.046	29.4911	1.48279	1.06047	4.16801	22.2523	8.42211	60.6031	105.676	43.8027	85.0639	108.18	52.8378	42.5319	52.5125	1.92657	7.47137	4.26977	4.23281
		2021-01-29	SM	GG431	6.01	162.176	54.0013	60.6062	158.183	37.4027	1.2931	1.11653	2.29607	18.9874	9.00593	60.0062	157.989	37.4899	1.2931	1.11393	2.27526	18.9301	8.85677	43.8067	152.93	40.0045	1.2931	1.04392	1.82123	17.4519	5.3229	60.6062	83.3776	43.8067	72.9207	64.0249	41.6888	36.4604	41.5048	2.41017	10.999	5.3765	5.36387
		2021-01-29	SM	GG459	4.65	208.206	58.657	60.6043	234.23	31.2185	1.38411	1.35749	3.98478	21.8783	22.2312	60.0043	233.951	31.2694	1.38411	1.35528	3.94884	21.7501	21.9265	43.8029	224.266	33.1641	1.38411	1.27785	2.91929	18.3209	13.9054	60.6043	171.793	43.8029	157.937	39.1641	85.8965	78.9687	85.706	5.8194	6.51396	5.82018	5.77444
		2021-01-30	SM	GG449	4.68	134.89	45.1262	60.6027	147.17	18.5582	1.69713	1.43278	14.0552	109.202	23.9567	60.0027	146.721	18.6342	1.69713	1.42693	13.9593	108.968	23.4937	43.8019	132.248	21.5642	1.69713	1.23305	11.4633	103.174	12.0669	60.6027	110.054	43.8019	89.1192	104.872	55.0269	44.5596	54.7263	2.10308	8.15813	4.37145	4.34145
		2021-02-01	SM	GG446	4.85	176.02	50.7179	60.6035	225.238	20.5854	1.5085	1.63327	9.57275	44.4732	36.1227	60.0035	224.89	20.6243	1.5085	1.63018	9.5049	44.3051	35.6149	43.8025	213.493	22	1.5085	1.52825	7.6677	39.9262	22.4954	60.6035	184.067	43.8025	169.493	38.3872	92.0335	84.7465	91.8206	5.56529	5.98615	5.49865	5.4625
		mean			4.938	167.138	50.9752	60.604	184.384	26.6955	1.47312	1.35128	7.14777	43.6757	21.5839	60.0039	184.043	26.7675	1.47312	1.34752	7.09003	43.5473	21.2323	43.8033	173.396	29.2448	1.47312	1.22871	5.60791	40.2251	12.4425	60.604	130.993	43.8033	114.907	70.9256	65.4967	57.4534	65.254	3.5649	7.82572	5.06731	5.03501
		SD			0.612021	27.3513	5.55923	0.00138739	41.7414	7.7398	0.151538	0.199703	4.71364	37.9888	10.0055	0.00143316	41.7749	7.74635	0.151538	0.199619	4.68592	37.9216	9.87719	0.00189774	42.3349	7.78895	0.151538	0.196603	3.94238	36.346	6.52292	0.00138739	44.2384	0.00189774	45.1379	34.1151	22.1192	22.5689	22.1431	1.95184	1.96281	0.701561	0.700392
		SEM			0.273704	12.2319	2.48616	0.000620461	18.6673	3.46134	0.0677698	0.0893099	2.108	16.9891	4.4746	0.000640929	18.6823	3.46427	0.0677698	0.0892724	2.09561	16.959	4.41721	0.000848694	18.9327	3.48332	0.0677698	0.0879234	1.76309	16.2544	2.91714	0.000620461	19.784	0.000848694	20.1863	15.2568	9.892	10.0931	9.9027	0.872891	0.877794	0.313748	0.313225
	P140+Lona 40d	2020-09-22	SM	GG327	2.96	211.89	55.8262	60.6019	238.077	23.0303	1.75917	1.37794	19.2028	109.548	33.6813	60.0019	237.399	23.1119	1.75917	1.37307	19.0816	109.188	33.0846	43.8013	215.588	26.1426	1.75917	1.2139	16.0195	100.316	18.2388	60.6019	192.016	43.8013	163.303	78.4985	96.0079	81.6513	95.5876
		2020-09-23	SM	GG333	2.58	270.191	55.4577	60.6031	274.449	31.1116	1.573	1.13321	6.26158	50.078	27.5573	60.003	274.045	31.1711	1.573	1.13105	6.20935	49.7373	27.1652	43.8018	259.704	33.4626	1.573	1.05359	4.68922	39.9029	16.8212	60.6031	212.226	43.8018	192.779	45.0344	106.113	96.3896	105.851
		2020-09-24	SM	GG336	2.22	218.781	51.5907	60.6034	247.432	23.5358	1.63684	1.33917	12.8919	77.6237	34.3911	60.0033	247.072	23.5781	1.63684	1.33677	12.8306	77.2619	33.9141	43.802	234.446	25.1813	1.63684	1.25166	11.0575	67.0475	21.345	60.6034	200.361	43.802	184.084	39.4737	100.18	92.0418	99.9582
		2020-09-25	SM	GG345	2.2	241.678	56.9663	60.6022	286.855	25.3884	1.58511	1.41554	10.6178	65.4777	37.5642	60.0022	286.302	25.4481	1.58511	1.41222	10.5303	65.0851	36.9993	43.8016	268.941	27.4935	1.58511	1.30716	8.26975	55.0377	22.7219	60.6022	236.079	43.8016	213.954	46.1668	118.039	106.977	117.703
		mean			2.49	235.635	54.9602	60.6026	261.703	25.7665	1.63853	1.31646	12.2435	75.6818	33.2985	60.0026	261.205	25.8273	1.63853	1.31328	12.1629	75.3181	32.7908	43.8017	244.67	28.07	1.63853	1.20658	10.009	65.576	19.7817	60.6026	210.17	43.8017	188.53	52.2933	105.085	94.2649	104.775	#DIV/0!	#DIV/0!	#DIV/0!	#DIV/0!
		SD			0.358701	26.3218	2.33633	0.000701167	22.7814	3.70478	0.0850588	0.126086	5.39376	25.2345	4.18323	0.000660942	22.812	3.70279	0.0850588	0.125333	5.3673	25.2325	4.11125	0.000303113	24.2584	3.71804	0.0850588	0.108943	4.78016	25.6851	2.72235	0.000701167	19.1596	0.000303113	20.9811	17.7133	9.57982	10.4906	9.58988	#DIV/0!	#DIV/0!	#DIV/0!	#DIV/0!
		SEM			0.179351	13.1609	1.16817	0.000350583	11.3907	1.85239	0.0425294	0.0630431	2.69688	12.6173	2.09161	0.000330471	11.406	1.8514	0.0425294	0.0626663	2.68365	12.6162	2.05562	0.000151557	12.1292	1.85902	0.0425294	0.0544717	2.39008	12.8426	1.36117	0.000350583	9.57982	0.000151557	10.4906	8.85664	4.78991	5.24528	4.79494	#DIV/0!	#DIV/0!	#DIV/0!	#DIV/0!
	P168+Rapa HD 68d	2021-02-02	SM	GG489																												0	0	0	0	#DIV/0!	0	0	0
		2021-02-10	SM	GG501																												0	0	0	0	#DIV/0!	0	0	0
			SM
			SM
			SM
		mean			#DIV/0!	#DIV/0!	#DIV/0!	#DIV/0!	#DIV/0!	#DIV/0!	#DIV/0!	#DIV/0!	#DIV/0!	#DIV/0!	#DIV/0!	#DIV/0!	#DIV/0!	#DIV/0!	#DIV/0!	#DIV/0!	#DIV/0!	#DIV/0!	#DIV/0!	#DIV/0!	#DIV/0!	#DIV/0!	#DIV/0!	#DIV/0!	#DIV/0!	#DIV/0!	#DIV/0!	0	0	0	0	#DIV/0!	0	0	0
		SD			#DIV/0!	#DIV/0!	#DIV/0!	#DIV/0!	#DIV/0!	#DIV/0!	#DIV/0!	#DIV/0!	#DIV/0!	#DIV/0!	#DIV/0!	#DIV/0!	#DIV/0!	#DIV/0!	#DIV/0!	#DIV/0!	#DIV/0!	#DIV/0!	#DIV/0!	#DIV/0!	#DIV/0!	#DIV/0!	#DIV/0!	#DIV/0!	#DIV/0!	#DIV/0!	#DIV/0!	0	0	0	0	#DIV/0!	0	0	0
		SEM			#DIV/0!	#DIV/0!	#DIV/0!	#DIV/0!	#DIV/0!	#DIV/0!	#DIV/0!	#DIV/0!	#DIV/0!	#DIV/0!	#DIV/0!	#DIV/0!	#DIV/0!	#DIV/0!	#DIV/0!	#DIV/0!	#DIV/0!	#DIV/0!	#DIV/0!	#DIV/0!	#DIV/0!	#DIV/0!	#DIV/0!	#DIV/0!	#DIV/0!	#DIV/0!	#DIV/0!	0	0	0	0	#DIV/0!	0	0	0
	P168+Lona 147d + Rapa LD 68d	2021-04-26	?	GG680																												0	0	0	0	#DIV/0!	0	0	0
		2021-04-26	?	GG681																												0	0	0	0	#DIV/0!	0	0	0
		2021-04-27	?	GG666																												0	0	0	0	#DIV/0!	0	0	0
		2021-04-27	?	GG667																												0	0	0	0	#DIV/0!	0	0	0
		2021-04-27	?	GG671																												0	0	0	0	#DIV/0!	0	0	0
		mean			#DIV/0!	#DIV/0!	#DIV/0!	#DIV/0!	#DIV/0!	#DIV/0!	#DIV/0!	#DIV/0!	#DIV/0!	#DIV/0!	#DIV/0!	#DIV/0!	#DIV/0!	#DIV/0!	#DIV/0!	#DIV/0!	#DIV/0!	#DIV/0!	#DIV/0!	#DIV/0!	#DIV/0!	#DIV/0!	#DIV/0!	#DIV/0!	#DIV/0!	#DIV/0!	#DIV/0!	0	0	0	0	#DIV/0!	0	0	0
		SD			#DIV/0!	#DIV/0!	#DIV/0!	#DIV/0!	#DIV/0!	#DIV/0!	#DIV/0!	#DIV/0!	#DIV/0!	#DIV/0!	#DIV/0!	#DIV/0!	#DIV/0!	#DIV/0!	#DIV/0!	#DIV/0!	#DIV/0!	#DIV/0!	#DIV/0!	#DIV/0!	#DIV/0!	#DIV/0!	#DIV/0!	#DIV/0!	#DIV/0!	#DIV/0!	#DIV/0!	0	0	0	0	#DIV/0!	0	0	0
		SEM			#DIV/0!	#DIV/0!	#DIV/0!	#DIV/0!	#DIV/0!	#DIV/0!	#DIV/0!	#DIV/0!	#DIV/0!	#DIV/0!	#DIV/0!	#DIV/0!	#DIV/0!	#DIV/0!	#DIV/0!	#DIV/0!	#DIV/0!	#DIV/0!	#DIV/0!	#DIV/0!	#DIV/0!	#DIV/0!	#DIV/0!	#DIV/0!	#DIV/0!	#DIV/0!	#DIV/0!	0	0	0	0	#DIV/0!	0	0	0
	Material Properties
	Type	Date	Personnel	Mouse #	Elastic Fibers	Axial Collagen		Circumferential Collagen		Diagonal Collagen					Linearized Stiffness @ Sys (MPa)				Linearized Stiffness @ Fixed (MPa)				Linearized Stiffness @ Low fixed (MPa)
					c (kPa)	c11 (kPa)	c21	c12 (kPa)	c22	c13,4 (kPa)	c23,4	ao (deg)	RMSE		Cqqqq	Czzzz	Cqqzz	Cqzqz	Cqqqq	Czzzz	Cqqzz	Cqzqz	Cqqqq	Czzzz	Cqqzz	Cqzqz
	P42 - Wt	2020-10-07	SM	WT498	8.71303	6.26382	3.23033e-14	3.9134	2.33795e-14	0.8689	1.04098	54.3303	0.171142		0.378239	0.966241	0.333202	0.492059	0.293946	0.871575	0.258319	0.410363	0.209732	0.771113	0.182304	0.32698
		2020-10-08	SM	WT503	3.29777	8.4153	0.00394633	7.18143	2.33734e-14	3.24929	1.86257	58.6423	0.149394		0.249163	1.03313	0.251891	0.419219	0.203641	0.973557	0.208451	0.371388	0.157247	0.909762	0.163492	0.321652
		2020-10-12	SM	WT519	1.5179	3.76219	0.122081	9.62112	2.33572e-14	0.985633	0.762128	46.4023	0.147376		0.254255	1.14717	0.21681	0.333314	0.206761	1.07647	0.173806	0.285055	0.159618	1.00433	0.131847	0.237648
		2021-06-14	SM	m1	11.5022	2.04358	0.232265	6.72841	0.336839	0.00421775	3.7505	45.1855	0.128855		0.658341	2.49925	0.940965	1.07294	0.511451	2.08485	0.716086	0.837873	0.360953	1.64549	0.483965	0.594805
		2021-06-15	SM	m2	8.70061	0.979961	0.316716	2.82841	1.33883	0.0445081	2.79651	42.421	0.288623		0.298615	1.06388	0.357122	0.428268	0.228017	0.89129	0.270068	0.335432	0.156899	0.707398	0.180787	0.239885
		mean			6.7463	4.29297	0.135002	6.05456	0.335134	1.03051	2.04254	49.3963	0.177078		0.367723	1.34193	0.419998	0.54916	0.288763	1.17955	0.325346	0.448022	0.20889	1.00762	0.228479	0.344194
		SD			4.16936	3.0494	0.139685	2.71279	0.579732	1.32066	1.24102	6.80411	0.0641318		0.170497	0.650216	0.296833	0.298202	0.129689	0.512486	0.221842	0.222772	0.0879226	0.37501	0.144257	0.146495
		SEM			1.8646	1.36373	0.0624692	1.2132	0.259264	0.590617	0.555002	3.04289	0.0286806		0.0762485	0.290786	0.132748	0.13336	0.0579986	0.229191	0.0992106	0.0996266	0.0393202	0.16771	0.0645139	0.0655145
	P42 - GG	2020-03-09	SM	GG163	8.48113	1.84345	0.438133	4.66061	0.669535	1.69951	1.82884	50.7216	0.160956		0.225802	0.213286	0.0872999	0.123706	0.275477	0.231138	0.107871	0.145983	0.104977	0.16647	0.0370606	0.0688153
		2020-03-10	SM	GG167	8.94702	0.168032	0.902566	3.58347	0.424009	0.0397118	2.24697	36.0395	0.161485		0.291524	0.926407	0.260606	0.318671	0.36074	1.0805	0.33136	0.394658	0.120616	0.524639	0.0891851	0.133206
		2020-03-11	SM	GG166	7.53623	1.83166	0.15134	2.35515	0.413979	0.388592	1.32312	50.6722	0.173825		0.220142	1.08331	0.22312	0.334529	0.269198	1.15674	0.27345	0.38917	0.0970937	0.88083	0.0936828	0.192841
		2021-04-29	SM	GG868	5.63651e-12	4.71327	0.126773	8.34464	4.53053e-11	6.01977	1.70035	60.9095	0.181664		0.197661	0.177497	0.0637065	0.0898998	0.226941	0.183129	0.0731118	0.100187	0.121774	0.162157	0.0393996	0.0631097
		2021-04-29	SM	GG879	2.22076e-14	3.27397	0.205394	12.4689	3.65972e-14	5.84962	1.53839	60.2717	0.230266		0.189965	2.35353	0.128693	0.313048	0.216925	2.37182	0.145909	0.332181	0.119285	2.30298	0.0832989	0.262225
		mean			4.99288	2.36608	0.364841	6.28255	0.301505	2.79944	1.72753	51.7229	0.181639		0.225019	0.950805	0.152685	0.235971	0.269856	1.00467	0.18634	0.272436	0.112749	0.807415	0.0685254	0.144039
		SD			4.58611	1.712	0.324885	4.11894	0.293647	2.92883	0.346462	10.0692	0.0285464		0.0400765	0.88427	0.0856974	0.118779	0.0568668	0.890402	0.110941	0.139458	0.0110854	0.887304	0.027912	0.0846685
		SEM			2.05097	0.765628	0.145293	1.84205	0.131323	1.30981	0.154943	4.50307	0.0127663		0.0179228	0.395457	0.038325	0.0531197	0.0254316	0.3982	0.0496144	0.0623677	0.00495755	0.396815	0.0124826	0.0378649
	P100 - Wt	2018-10-16	SM	P157 M	8.47656	5.48789	0.0389117	4.12542	0.482832	0.0204242	2.11537	40.0687	0.150597		0.540798	2.52289	0.840252	0.985635	0.344948	1.80202	0.524802	0.648775	0.331041	1.74882	0.502246	0.62462
		2018-10-24	SM	P162 M	15.02	1.03105	0.388721	0.710856	1.45377	0.0302966	2.70424	47.1796	0.115164		0.824491	1.94438	0.855636	0.987773	0.498346	1.47319	0.511796	0.627243	0.474903	1.43785	0.486683	0.600861
		2019-01-28	SM	P210 F	14.1735	0.8492	0.533445	4.84547	0.835629	0.00492382	4.42265	42.2082	0.160399		0.618665	2.98212	0.999381	1.13003	0.377212	2.09603	0.584057	0.69454	0.360109	2.03104	0.554423	0.663409
		2018-02-09	SM	Jejunal	3.14123	8.02128	2.33737e-14	0.900739	0.120983	0.00733263	1.31155	36.8022	0.119238		1.51167	1.43495	0.990921	1.08721	1.0249	1.03337	0.639104	0.719561	0.989587	1.00403	0.613938	0.693226
		2018-04-13	SM	Jejunal	2.29536	11.4514	0.0283908	0.926728	0.025178	0.0390439	0.642873	32.1502	0.163644		0.916228	2.83304	1.10141	1.32218	0.603408	2.17708	0.718121	0.910316	0.581072	2.12843	0.690561	0.880612
		mean			8.62133	5.36817	0.197894	2.30184	0.583678	0.0204042	2.23934	39.6818	0.141809		0.882371	2.34348	0.957521	1.10257	0.569763	1.71634	0.595576	0.720087	0.547342	1.67003	0.569571	0.692545
		SD			5.95482	4.5632	0.246058	2.01127	0.582391	0.0146271	1.44982	5.65171	0.0230164		0.382991	0.645063	0.109208	0.137903	0.274317	0.471531	0.0852537	0.112411	0.266368	0.459383	0.0840232	0.110949
		SEM			2.66308	2.04072	0.11004	0.899465	0.260453	0.00654143	0.648377	2.52752	0.0102933		0.171279	0.288481	0.0488392	0.0616721	0.122678	0.210875	0.0381266	0.0502719	0.119123	0.205442	0.0375763	0.0496179
	P100 - GG	2020-02-26	SM	GG75	6.10817	4.58926	0.129389	4.33455	0.906195	0.0902059	2.10387	40.2327	0.136975		0.265119	1.32607	0.338568	0.438554	0.260114	1.31182	0.332263	0.43173	0.138572	0.94356	0.175688	0.261552
		2020-02-28	SM	GG86	10.9477	1.89833	0.35484	0.93784	1.39589	0.138574	2.08288	46.1397	0.107108		0.399941	0.958022	0.318063	0.406941	0.391087	0.94891	0.311158	0.399602	0.176267	0.709326	0.136921	0.213725
		2020-03-02	SM	GG84	11.0242	5.82128	0.00820936	1.16538	0.866764	0.0260601	2.02638	40.252	0.0714395		0.33502	0.912951	0.312971	0.405525	0.326784	0.898213	0.304983	0.397016	0.1309	0.517731	0.109087	0.187329
		2018-11-14	SM	P176 F	16.6384	0.00498745	1.40793	26.7923	2.40856e-14	7.81901	2.59705	51.5416	0.191274		0.287071	2.30779	0.378416	0.525582	0.283293	2.29808	0.373527	0.520108	0.192561	2.05594	0.255632	0.38741
		2018-11-15	SM	P178 M	11.3786	0.320177	0.637373	7.27489	1.67959	0.0131522	4.19957	42.4507	0.241535		0.644104	3.0932	1.04606	1.16691	0.633027	3.05255	1.0277	1.14757	0.355026	1.99478	0.562358	0.656631
		mean			11.2194	2.52681	0.507548	8.10099	0.969687	1.6174	2.60195	44.1234	0.149666		0.386251	1.71961	0.478815	0.588702	0.378861	1.70191	0.469925	0.579205	0.198665	1.24427	0.247937	0.341329
		SD			3.72918	2.5851	0.557494	10.7662	0.640415	3.46717	0.922121	4.79632	0.0675701		0.153142	0.951092	0.318143	0.326894	0.150579	0.941375	0.312956	0.321609	0.0910918	0.729129	0.184217	0.19229
		SEM			1.66774	1.15609	0.249319	4.8148	0.286403	1.55057	0.412385	2.14498	0.0302183		0.0684872	0.425341	0.142278	0.146191	0.0673409	0.420996	0.139958	0.143828	0.0407375	0.326076	0.0823843	0.0859947
	P140 - Wt	2018-02-21	SM	2	6.07647	5.1033	0.0847495	0.946005	0.186978	0.0054394	1.45558	39.8867	0.109048		1.33309	1.59112	1.00015	1.1076	0.869647	1.14599	0.62341	0.714341	0.836137	1.11335	0.59639	0.686095
		2018-02-26	SM	3	4.91286	4.45819	2.33731e-14	0.526956	0.419115	0.00147896	2.11349	36.6083	0.126317		1.49775	1.84507	1.04748	1.13345	1.03247	1.33418	0.708452	0.780155	0.998303	1.29615	0.683647	0.754279
		2018-03-05	SM	4	4.83354	9.01843	2.33731e-14	2.67652	0.144081	0.0191496	1.61248	36.1338	0.115855		0.934422	1.69829	0.81535	0.9281	0.606514	1.18631	0.495331	0.589668	0.583202	1.14948	0.472976	0.565971
		2018-10-15	SM	WTM3	4.73343	5.28598	0.125656	0.688723	0.121994	5.92949e-06	2.22644	34.7233	0.136212		2.43112	4.56967	2.64217	2.7967	1.60169	3.11707	1.64896	1.77542	1.54108	3.01006	1.57686	1.70123
		2018-10-17	SM	WTM4	2.62215	6.86602	1.63144e-12	3.23959	0.0441725	0.0228296	1.15817	28.4603	0.195475		0.707529	1.77379	0.582911	0.687384	0.454348	1.19546	0.334255	0.418426	0.436792	1.15558	0.317843	0.400593
		mean			4.63569	6.14638	0.042081	1.61556	0.183268	0.00978069	1.71323	35.1625	0.136581		1.38078	2.29559	1.21761	1.33065	0.912934	1.5958	0.762081	0.855601	0.879104	1.54492	0.729543	0.821634
		SD			1.25057	1.83336	0.059409	1.25055	0.141665	0.0105043	0.449504	4.19715	0.0345021		0.665522	1.27473	0.817048	0.838716	0.445741	0.853375	0.515473	0.532341	0.42938	0.822002	0.49323	0.509715
		SEM			0.559271	0.819904	0.0265685	0.559263	0.0633543	0.00469766	0.201024	1.87702	0.0154298		0.297631	0.570076	0.365395	0.375085	0.199341	0.381641	0.230527	0.23807	0.192024	0.36761	0.220579	0.227952
	P140 - GG	2019-11-02	SM	GG6253	35.5465	0.000125513	55.5019	4.74008e-10	6.69322	0.0861661	73.3654	32.2791	0.484364		0.266361	1.26175	0.437182	0.49703	0.258941	1.21904	0.420257	0.47963	0.121649	0.405062	0.107088	0.157141
		2019-11-08	SM	GG6235	2.27419e-14	3.98751	0.242697	3.23657e-09	6.97201e-13	19.056	0.275221	59.6896	0.263154		0.222368	0.987043	0.106061	0.211794	0.218324	0.985833	0.104666	0.210077	0.122648	0.954453	0.0703416	0.167099
		2019-11-27	SM	GG6228	7.24218	3.01567	0.26025	5.14115	0.0329888	0.0285509	2.55764	39.1275	0.206319		0.0867334	5.57744	0.363812	0.647636	0.0853611	5.54726	0.358319	0.641418	0.0537475	4.81058	0.229593	0.494844
		2019-12-02	SM	GG6233	17.6788	5.35594e-06	2.78761	4.41563	0.822812	1.90959e-05	5.99802	35.6564	0.262709		0.274962	0.146949	0.023797	0.0679991	0.266683	0.14358	0.0223535	0.066495	0.0961747	0.0922868	0.00179321	0.0449827
		2019-12-04	SM	GG6238	11.7082	1.18838	0.638352	1.55424	2.00666	0.0295611	3.72495	40.5471	0.13158		0.253973	1.21442	0.308645	0.388995	0.247783	1.19821	0.30075	0.380617	0.102056	0.784991	0.108816	0.176118
		mean			14.4351	1.63834	11.8862	2.2222	1.91114	3.84006	17.1842	41.46	0.269625		0.220879	1.83752	0.247899	0.362691	0.215418	1.81878	0.241269	0.355648	0.0992551	1.40947	0.103527	0.208037
		SD			13.4514	1.8018	24.4047	2.43176	2.79472	8.50602	31.474	10.6837	0.131593		0.0775983	2.13823	0.175566	0.228881	0.0749885	2.12993	0.170191	0.224978	0.0280046	1.93057	0.0827412	0.168916
		SEM			6.01564	0.805791	10.9141	1.08752	1.24984	3.80401	14.0756	4.77788	0.0588501		0.034703	0.956245	0.0785155	0.102359	0.0335359	0.952534	0.0761117	0.100613	0.012524	0.863376	0.037003	0.0755414
	P168 - Wt	2020-07-17	SM	WT160	9.75696	2.79702	0.175873	3.10486	0.318105	0.00805761	2.18731	43.7112	0.0900716		0.883885	1.82377	0.868551	0.987639	0.545371	1.30113	0.505518	0.607543	0.521234	1.26299	0.479736	0.5805
		2020-08-24	SM	WT249	7.86944	2.31315	0.471259	4.0678	0.332363	0.000267945	4.8603	39.1725	0.111665		0.864991	2.59444	1.11369	1.21184	0.525558	1.72653	0.623625	0.704681	0.501471	1.66394	0.589066	0.668874
		2020-08-25	SM	WT257	8.63908	3.18647	0.167138	5.63583	0.339309	0.0368791	2.0202	41.7326	0.0935993		0.514717	1.59341	0.549827	0.662278	0.319927	1.16635	0.319106	0.416398	0.306342	1.13579	0.303183	0.399373
		2020-09-03	SM	WT269	7.57906	0.853697	0.334598	3.49921	0.194796	0.138799	1.1668	41.6026	0.134617		0.564026	1.07918	0.44013	0.525454	0.348589	0.808197	0.257897	0.329312	0.333551	0.788672	0.245287	0.315682
		2020-09-04	SM	WT268	9.40543	2.42846	0.174666	4.01443	0.353718	0.00748512	2.26683	46.2455	0.101888		0.993287	2.18322	1.01807	1.15591	0.632048	1.62516	0.622139	0.742097	0.606124	1.58412	0.593699	0.712326
		mean			8.65	2.31576	0.264707	4.06443	0.307658	0.0382977	2.50029	42.4929	0.106368		0.764181	1.8548	0.798054	0.908625	0.474299	1.32547	0.465657	0.560006	0.453745	1.2871	0.442194	0.535351
		SD			0.942385	0.886014	0.135154	0.963333	0.0643827	0.0579064	1.39021	2.64396	0.0178518		0.211704	0.575716	0.292716	0.302837	0.134347	0.368831	0.170052	0.18041	0.128672	0.354308	0.161269	0.171706
		SEM			0.421447	0.396237	0.0604429	0.430816	0.0287928	0.0258965	0.621723	1.18242	0.00798358		0.0946771	0.257468	0.130907	0.135433	0.060082	0.164946	0.0760495	0.0806817	0.0575439	0.158451	0.0721218	0.0767892
	P168 - GG	2019-12-31	SM	GG6245	5.47484	4.66405	0.41995	5.80195	2.33227	0.00765332	8.54978	20.2875	0.148544		0.186923	0.398328	0.0321065	0.0577314	0.183216	0.396227	0.031796	0.0573823	0.0948926	0.331598	0.0225327	0.0469239
		2020-01-21	SM	GG6269	6.10962	0.000426472	2.95396	7.1951	9.2937	0.014267	5.41518	35.6392	0.224124		0.298065	0.86331	0.214787	0.249591	0.292219	0.855884	0.212467	0.247103	0.153088	0.634746	0.144895	0.174481
		2020-02-17	SM	GG6294	2.90228e-11	0.5322	4.06291	2.23661e-08	3.74298e-10	24.485	4.92157e-14	57.1219	0.254193		0.100424	0.0927698	0.0399375	0.0500701	0.0993665	0.092597	0.0397647	0.0498109	0.0734016	0.0880348	0.0352026	0.0429677
		2020-08-21	SM	GG251	10.8138	0.769473	1.05927	2.47831	2.17021	0.0809567	2.97759	38.1421	0.14632		0.268824	1.12498	0.18482	0.258373	0.262303	1.11695	0.181117	0.254385	0.111378	0.89367	0.0827435	0.147919
		2020-08-22	SM	GG259	3.03048e-14	37.7402	3.08538e-14	41.5155	2.19584e-12	16.3635	85.8447	31.6613	1.77294		0.327683	1.27389	0.446302	0.473592	0.324118	1.25776	0.439571	0.466592	0.237704	0.868464	0.279602	0.299978
		mean			4.47965	8.74126	1.69922	11.3982	2.75924	8.19027	20.5575	36.5704	0.509225		0.236384	0.750656	0.183591	0.217872	0.232244	0.743885	0.180943	0.215055	0.134093	0.563302	0.112995	0.142454
		SD			4.57993	16.3164	1.73888	17.0698	3.8228	11.5313	36.6318	13.3691	0.708007		0.0923631	0.495867	0.168505	0.174529	0.0908315	0.490112	0.165875	0.171764	0.0648693	0.348904	0.104792	0.10594
		SEM			2.04821	7.29692	0.777651	7.63386	1.70961	5.15695	16.3822	5.97886	0.31663		0.041306	0.221758	0.0753577	0.0780519	0.0406211	0.219185	0.0741817	0.0768151	0.0290104	0.156035	0.0468646	0.0473777
	P168+Lona 68d	2020-10-20	SM	GG318	9.90777	0.400337	0.828405	2.44089	1.59559	0.182917	2.11807	45.1253	0.0925309		0.329166	1.04803	0.22031	0.296134	0.322004	1.04142	0.215864	0.29137	0.150144	0.865391	0.102314	0.169169
		2020-10-21	SM	GG316	0.347508	1.47599	1.37619	13.7918	0.673737	8.29855	1.53767	49.4217	0.102233		0.205801	0.550803	0.110355	0.151288	0.202891	0.549228	0.108953	0.149707	0.132343	0.508981	0.0743573	0.110452
		2020-10-22	SM	GG314	15.7732	2.46187e-05	3.56661	3.70523	3.6802	2.97498e-05	6.4885	32.1568	0.143502		0.310052	0.31917	0.0527233	0.0962131	0.301142	0.314354	0.0514199	0.0948367	0.103479	0.181185	0.0170427	0.0584109
		2020-10-23	SM	GG340	8.43564	0.644249	1.21272	5.50216	2.94195	0.37553	3.44375	43.0001	0.0972481		0.251507	0.733328	0.170342	0.223745	0.246451	0.728272	0.167377	0.220555	0.126304	0.592792	0.0907775	0.137822
			SM
		mean			8.61603	0.63015	1.74598	6.36003	2.22287	2.21426	3.397	42.426	0.108878		0.274132	0.662833	0.138433	0.191845	0.268122	0.658319	0.135904	0.189117	0.128067	0.537087	0.071123	0.118963
		SD			6.35858	0.623301	1.23528	5.11127	1.34588	4.05909	2.21	7.34871	0.0234197		0.0562732	0.307681	0.0727017	0.0869563	0.0539082	0.306527	0.0712931	0.0854125	0.0192646	0.281865	0.0378344	0.0469584
		SEM			3.17929	0.311651	0.61764	2.55563	0.672939	2.02955	1.105	3.67436	0.0117099		0.0281366	0.153841	0.0363508	0.0434782	0.0269541	0.153263	0.0356465	0.0427063	0.00963229	0.140932	0.0189172	0.0234792
	P168+Lona 147d	2021-01-28	ABR	GG469	10.4675	0.526569	0.48735	4.17365	0.888856	0.18061	1.58382	42.5216	0.181687		0.0749266	0.0903417	0.00657272	0.0336278	0.0728789	0.090008	0.00636129	0.0333895	0.0374017	0.0834867	0.00253774	0.0290233
		2021-01-29	ABR	GG431	2.42291e-14	1.72554	1.57524	1.95704	1.86255e-12	8.43626	3.90166	55.7528	0.251026		0.0644385	0.130616	0.0246693	0.0436566	0.0637045	0.130426	0.0245345	0.0434646	0.0460155	0.125574	0.021105	0.038557
		2021-01-29	ABR	GG459	4.54393	0.162527	3.58468	4.82574	0.786404	0.0208646	6.16753	26.2953	0.134493		0.186409	0.542956	0.0769291	0.100095	0.182785	0.537691	0.0755047	0.0985461	0.0965281	0.400996	0.0400357	0.0598091
		2021-01-30	ABR	GG449	3.50841	3.0695	0.458076	2.59022	1.1346e-13	1.81098	0.354005	45.6613	0.214076		0.113324	1.3859	0.0567939	0.16659	0.110709	1.38425	0.055445	0.165011	0.0520682	1.34515	0.0259695	0.129945
		2021-02-01	ABR	GG446	1.30871	9.57865	2.33731e-14	4.33012	0.156093	0.0298474	2.51864	23.6137	0.10746		0.270352	0.586555	0.0891651	0.133854	0.265688	0.581054	0.0876752	0.132197	0.152652	0.439764	0.0510443	0.0912168
		mean			3.9657	3.01256	1.22107	3.57536	0.366271	2.09571	2.90513	38.7689	0.177748		0.14189	0.547274	0.050826	0.0955645	0.139153	0.544685	0.0499042	0.0945217	0.0769331	0.478994	0.0281385	0.0697102
		SD			4.04978	3.84305	1.44253	1.23293	0.436489	3.62367	2.23829	13.5583	0.0581299		0.086289	0.521356	0.0347469	0.057144	0.0848657	0.520715	0.034104	0.0564543	0.0480995	0.509701	0.0185459	0.0412757
		SEM			1.81112	1.71866	0.64512	0.551385	0.195204	1.62056	1.001	6.06347	0.0259965		0.0385896	0.233158	0.0155393	0.0255556	0.0379531	0.232871	0.0152518	0.0252471	0.0215107	0.227945	0.00829396	0.018459
	P140+Lona 40d	2020-09-22	SM	GG327	5.2961	5.55504	0.147195	4.46592	2.49458e-14	2.17323	0.453764	46.185	0.191737		0.168729	0.837706	0.101075	0.211524	0.165124	0.834656	0.0988126	0.208908	0.0833674	0.7622	0.048669	0.150146
		2020-09-23	SM	GG333	3.38489	0.0195591	2.20415	1.57233	9.5584	7.75989	1.45626	48.7329	0.169832		0.205529	0.671078	0.177658	0.228802	0.201023	0.667536	0.175055	0.225862	0.102758	0.568038	0.1052	0.146335
		2020-09-24	SM	GG336	6.31791	6.31858	5.93775e-14	5.67411	0.867838	0.27644	1.61955	34.2677	0.116403		0.265523	0.893173	0.200284	0.279222	0.260223	0.884929	0.197234	0.275816	0.134604	0.65658	0.116381	0.184933
		2020-09-25	SM	GG345	2.99524	5.64314	2.8625e-11	9.87373	0.17032	0.338957	1.53487	28.304	0.100012		0.241465	0.927051	0.167373	0.233445	0.23736	0.917897	0.164661	0.230344	0.140009	0.687228	0.0995018	0.155237
		mean			4.49854	4.38408	0.587837	5.39652	2.64914	2.63713	1.26611	39.3724	0.144496		0.220311	0.832252	0.161597	0.238248	0.215932	0.826255	0.158941	0.235232	0.115184	0.668511	0.0924379	0.159163
		SD			1.57547	2.9296	1.07978	3.44543	4.62145	3.52668	0.545652	9.70563	0.0433654		0.0423118	0.113586	0.0426259	0.0288985	0.0417313	0.111211	0.0423248	0.0285871	0.0268335	0.0803435	0.0300097	0.017563
		SEM			0.787736	1.4648	0.539888	1.72271	2.31073	1.76334	0.272826	4.85281	0.0216827		0.0211559	0.0567929	0.021313	0.0144493	0.0208657	0.0556053	0.0211624	0.0142936	0.0134167	0.0401717	0.0150048	0.00878149
	P168+Rapa HD 68d	2021-02-02	SM	GG489
		2021-02-10	SM	GG501
			SM
			SM
			SM
		mean			#DIV/0!	#DIV/0!	#DIV/0!	#DIV/0!	#DIV/0!	#DIV/0!	#DIV/0!	#DIV/0!	#DIV/0!		#DIV/0!	#DIV/0!	#DIV/0!	#DIV/0!	#DIV/0!	#DIV/0!	#DIV/0!	#DIV/0!	#DIV/0!	#DIV/0!	#DIV/0!	#DIV/0!
		SD			#DIV/0!	#DIV/0!	#DIV/0!	#DIV/0!	#DIV/0!	#DIV/0!	#DIV/0!	#DIV/0!	#DIV/0!		#DIV/0!	#DIV/0!	#DIV/0!	#DIV/0!	#DIV/0!	#DIV/0!	#DIV/0!	#DIV/0!	#DIV/0!	#DIV/0!	#DIV/0!	#DIV/0!
		SEM			#DIV/0!	#DIV/0!	#DIV/0!	#DIV/0!	#DIV/0!	#DIV/0!	#DIV/0!	#DIV/0!	#DIV/0!		#DIV/0!	#DIV/0!	#DIV/0!	#DIV/0!	#DIV/0!	#DIV/0!	#DIV/0!	#DIV/0!	#DIV/0!	#DIV/0!	#DIV/0!	#DIV/0!
	P168+Lona 147d + Rapa LD 68d	2021-04-26	SM	GG680
		2021-04-26	SM	GG681
		2021-04-27	SM	GG666
		2021-04-27	SM	GG667
		2021-04-27	SM	GG671
		mean			#DIV/0!	#DIV/0!	#DIV/0!	#DIV/0!	#DIV/0!	#DIV/0!	#DIV/0!	#DIV/0!	#DIV/0!		#DIV/0!	#DIV/0!	#DIV/0!	#DIV/0!	#DIV/0!	#DIV/0!	#DIV/0!	#DIV/0!	#DIV/0!	#DIV/0!	#DIV/0!	#DIV/0!
		SD			#DIV/0!	#DIV/0!	#DIV/0!	#DIV/0!	#DIV/0!	#DIV/0!	#DIV/0!	#DIV/0!	#DIV/0!		#DIV/0!	#DIV/0!	#DIV/0!	#DIV/0!	#DIV/0!	#DIV/0!	#DIV/0!	#DIV/0!	#DIV/0!	#DIV/0!	#DIV/0!	#DIV/0!
		SEM			#DIV/0!	#DIV/0!	#DIV/0!	#DIV/0!	#DIV/0!	#DIV/0!	#DIV/0!	#DIV/0!	#DIV/0!		#DIV/0!	#DIV/0!	#DIV/0!	#DIV/0!	#DIV/0!	#DIV/0!	#DIV/0!	#DIV/0!	#DIV/0!	#DIV/0!	#DIV/0!	#DIV/0!

## Sheet: Parameters
						Elastic fibers		Axial Collagen			Circumf. Coll +SMC			Symmetric diagonal collagen				Error
						c (kPa)		c11 (kPa)	c21		c12 (kPa)	c22		c13,4 (kPa)	c23,4	ao (deg)		RMSE
			ATA	Wt		23.3907		13.9852	26.052		2.25925	62.4763		42.3779	20.8189	52.728		0.102069
				r1r2		38.0328		2.89073	18.6936		6.73252	20.8777		1.55903	28.1875	44.5014		0.0615977
				r1r2NE		9.70757		8.12489	10.2468		0.988565	67.1482		78.1554	87.6557	58.3028		0.142988
			SAA	Wt		#REF!		#REF!	#REF!		#REF!	#REF!		#REF!	#REF!	#REF!		#REF!
				r1r2		#REF!		#REF!	#REF!		#REF!	#REF!		#REF!	#REF!	#REF!		#REF!
				r1r2NE		#REF!		#REF!	#REF!		#REF!	#REF!		#REF!	#REF!	#REF!		#REF!

## Sheet: DTA Tables Treatment (2)
DTA	WT			GG			GG + L			GG + L + R
	n	=	5	n	=	5	n	=	5	n	=	5
Unloaded dimensions
Wall thickness (μm)	97.8834	±	2.4394	132.408	±	6.08718	125.449	±	4.65761	131.955	±	3.57293
Outer diameter (μm)	795.623	±	7.76749	939.373	±	20.5413	933.641	±	36.1881	990.429	±	14.9778
Axial length (mm)	4.634	±	0.15374	5.282	±	0.0824864	5.0814	±	0.599662	4.104	±	0.260856
	Systolic pressure
	P	=	126.001	P	=	101.015	P	=	101.008	P	=	101.008
Loaded dimensions
Outer diameter (μm)	1259.23	±	15.9585	973.103	±	20.1484	1028.43	±	21.3273	987.018	±	12.8093
Wall thickness (μm)	35.1398	±	1.29303	115.321	±	7.43839	95.3452	±	5.86546	108.601	±	3.15576
Inner radius (µm)	594.473	±	8.16684	371.23	±	14.5324	418.872	±	8.13055	384.908	±	8.93714
In vivo axial stretch (λziv)	1.59071	±	0.0165708	1.08545	±	0.0263756	1.14363	±	0.0268104	1.18794	±	0.0162607
In vivo Circumferential Stretch (λϑ)	1.75426	±	0.0108697	1.06556	±	0.0368034	1.15913	±	0.0303523	1.02371	±	0.0102088
Cauchy stresses (kPa)
Circumferential, σϑ	285.888	±	12.1506	44.4035	±	4.26807	60.0531	±	3.85544	48.0955	±	2.61051
Axial, σz	259.4	±	11.6221	67.3905	±	17.2974	51.9614	±	6.82316	47.9993	±	3.31472
Linearized material stiffness (MPa)
Circumferential,Cqqqq	1.86192	±	0.11285	1.71143	±	0.372446	0.945793	±	0.130711	0.945793	±	0.130711
Axial, Czzzz	2.71099	±	0.272678	3.68904	±	1.56567	0.800629	±	0.0898404	0.800629	±	0.0898404
Stored elastic energy (kPa)	73.737	±	3.49794	2.40275	±	0.888232	5.8881	±	1.24169	2.59753	±	0.456441
	Fixed pressure
	P	=	100.001	P	=	100.091	P	=	100.015	P	=	100.015
Loaded dimensions
Outer diameter (μm)	1191.55	±	14.5507	972.843	±	20.1152	1027.68	±	21.4189	986.653	±	12.6647
Wall thickness (μm)	37.2712	±	1.41332	115.358	±	7.43068	95.4247	±	5.84851	108.648	±	3.13548
Inner radius (µm)	558.503	±	7.59996	371.064	±	14.4956	418.417	±	8.11425	384.678	±	8.83407
In vivo axial stretch (λziv)	1.59071	±	0.0165708	1.08545	±	0.0263756	1.14363	±	0.0268104	1.18794	±	0.0162607
In vivo circumferential stretch (λϑ)	1.65426	±	0.0109543	1.06519	±	0.0367175	1.15808	±	0.0301428	1.02324	±	0.0102533
Cauchy Stresses (kPa)
Circumferential, σϑ	201.095	±	9.04421	43.9575	±	4.20685	59.3363	±	3.77163	47.5416	±	2.55126
Axial, σz	208.766	±	9.09517	67.1572	±	17.2633	51.6828	±	6.79196	47.7378	±	3.29272
Linearized material stiffness (MPa)
Circumferential,Cqqqq	1.11399	±	0.0653309	1.69405	±	0.370184	0.921724	±	0.126835	0.921724	±	0.126835
Axial, Czzzz	1.88517	±	0.168499	3.68465	±	1.56718	0.797128	±	0.090098	0.797128	±	0.090098
Stored elastic energy (kPa)	59.698	±	3.16832	2.38714	±	0.881108	5.83091	±	1.22087	2.58937	±	0.457583

## Sheet: DTA Tables Treatment
	DTA - Systolic pressure
	Wt			LmnaG609G			LmnaG609G + L(P100)			LmnaG609G + L(P21)
	n	=	5	n	=	5	n	=	4	n	=	5
Unloaded dimensions
Wall thickness (μm)	97.8834	±	2.4394	132.408	±	6.08718	115.049	±	4.4273	125.449	±	4.65761
Outer diameter (μm)	795.623	±	7.76749	939.373	±	20.5413	916.649	±	40.2159	933.641	±	36.1881
Axial length (mm)	4.634	±	0.15374	5.282	±	0.0824864	5.33	±	0.520465	5.0814	±	0.599662
Loaded dimensions	P	=	126.001	P	=	101.015	P	=	101.012	P	=	101.008
Outer diameter (μm)	1259.23	±	15.9585	973.103	±	20.1484	973.284	±	16.6379	1028.43	±	21.3273
Wall thickness (μm)	35.1398	±	1.29303	115.321	±	7.43839	96.0267	±	5.63812	95.3452	±	5.86546
Inner radius (µm)	594.473	±	8.16684	371.23	±	14.5324	390.615	±	10.5085	418.872	±	8.13055
In vivo axial stretch (λziv)	1.59071	±	0.0165708	1.08545	±	0.0263756	1.09486	±	0.0208705	1.14363	±	0.0268104
In vivo Circumferential Stretch (λϑ)	1.75426	±	0.0108697	1.06556	±	0.0368034	1.10194	±	0.0501029	1.15913	±	0.0303523
Cauchy stresses (kPa)
Circumferential, σϑ	285.888	±	12.1506	44.4035	±	4.26807	55.5847	±	4.80265	60.0531	±	3.85544
Axial, σz	259.4	±	11.6221	67.3905	±	17.2974	117.968	±	34.8179	51.9614	±	6.82316
Linearized material stiffness (MPa)
Circumferential,Cqqqq	1.86192	±	0.11285	1.71143	±	0.372446	2.29483	±	0.850429	0.945793	±	0.130711
Axial, Czzzz	2.71099	±	0.272678	3.68904	±	1.56567	4.27943	±	2.03015	0.800629	±	0.0898404
Stored elastic energy (kPa)	73.737	±	3.49794	2.40275	±	0.888232	5.28348	±	0.962276	5.8881	±	1.24169
	DTA - Fixed pressure
	Wt			LmnaG609G			LmnaG609G + L(P100)			LmnaG609G + L(P21)
	n	=	5	n	=	5	n	=	4	n	=	5
Unloaded dimensions
Wall thickness (μm)	97.8834	±	2.4394	132.408	±	6.08718	115.049	±	4.4273	125.449	±	4.65761
Outer diameter (μm)	795.623	±	7.76749	939.373	±	20.5413	916.649	±	40.2159	933.641	±	36.1881
Axial length (mm)	4.634	±	0.15374	5.282	±	0.0824864	5.33	±	0.520465	5.0814	±	0.599662
Loaded dimensions	P	=	100.001	P	=	100.091	P	=	100.015	P	=	100.015
Outer diameter (μm)	1191.55	±	14.5507	972.843	±	20.1152	972.981	±	16.6736	1027.68	±	21.4189
Wall thickness (μm)	37.2712	±	1.41332	115.358	±	7.43068	96.0621	±	5.63056	95.4247	±	5.84851
Inner radius (µm)	558.503	±	7.59996	371.064	±	14.4956	390.428	±	10.5002	418.417	±	8.11425
In vivo axial stretch (λziv)	1.59071	±	0.0165708	1.08545	±	0.0263756	1.09486	±	0.0208705	1.14363	±	0.0268104
In vivo circumferential stretch (λϑ)	1.65426	±	0.0109543	1.06519	±	0.0367175	1.1015	±	0.0499423	1.15808	±	0.0301428
Cauchy Stresses (kPa)
Circumferential, σϑ	201.095	±	9.04421	43.9575	±	4.20685	54.9868	±	4.74283	59.3363	±	3.77163
Axial, σz	208.766	±	9.09517	67.1572	±	17.2633	117.755	±	34.8436	51.6828	±	6.79196
Linearized material stiffness (MPa)
Circumferential,Cqqqq	1.11399	±	0.0653309	1.69405	±	0.370184	2.26952	±	0.857821	0.921724	±	0.126835
Axial, Czzzz	1.88517	±	0.168499	3.68465	±	1.56718	4.27381	±	2.03212	0.797128	±	0.090098
Stored elastic energy (kPa)	59.698	±	3.16832	2.38714	±	0.881108	5.26099	±	0.954512	5.83091	±	1.22087

## Sheet: SMA2 Tables Treatment (2)
MA	WT			GG			GG + L
	n	=	5	n	=	5	n	=	5
Unloaded dimensions
Wall thickness (μm)	49.9637	±	1.66423	55.1255	±	5.16079	50.9752	±	2.48616
Outer diameter (μm)	224.599	±	8.02448	224.522	±	9.9992	167.138	±	12.2319
Axial length (mm)	2.654	±	0.277914	3.444	±	0.518745	4.938	±	0.273704
	Systolic pressure
	P	=	75.6086	P	=	60.6104	P	=	60.604
Loaded dimensions
Outer diameter (μm)	281.796	±	11.26	233.794	±	8.33163	184.384	±	18.6673
Wall thickness (μm)	19.0525	±	0.864253	35.1564	±	4.011	26.6955	±	3.46134
Inner radius (µm)	121.845	±	5.42808	81.7404	±	1.95099	65.4967	±	9.892
In vivo axial stretch (λziv)	1.74862	±	0.0356877	1.36449	±	0.095368	1.47312	±	0.0677698
In vivo Circumferential Stretch (λϑ)	1.50512	±	0.0286853	1.17779	±	0.0416809	1.35128	±	0.0893099
Cauchy stresses (kPa)
Circumferential, σϑ	64.9307	±	3.69012	20.1007	±	3.00053	21.5839	±	4.4746
Axial, σz	109.315	±	8.94039	33.0041	±	10.2067	43.6757	±	16.9891
Linearized material stiffness (MPa)
Circumferential,Cqqqq	0.764181	±	0.0946771	0.236384	±	0.041306	0.14189	±	0.0385896
Axial, Czzzz	1.8548	±	0.257468	0.750656	±	0.221758	0.547274	±	0.233158
Stored elastic energy (kPa)	18.9117	±	1.56029	4.19408	±	1.72429	7.14777	±	2.108
	Fixed pressure
	P	=	60.0051	P	=	60.0083	P	=	60.0039
Loaded dimensions
Outer diameter (μm)	274.906	±	11.2838	233.587	±	8.31943	184.043	±	18.6823
Wall thickness (μm)	19.6126	±	0.886262	35.202	±	4.02013	26.7675	±	3.46427
Inner radius (µm)	117.841	±	5.46455	81.5913	±	1.94838	65.254	±	9.9027
In vivo axial stretch (λziv)	1.74862	±	0.0356877	1.36449	±	0.095368	1.47312	±	0.0677698
In vivo circumferential stretch (λϑ)	1.46202	±	0.0264343	1.17629	±	0.0415709	1.34752	±	0.0892724
Cauchy Stresses (kPa)
Circumferential, σϑ	48.4257	±	2.8795	19.8406	±	2.96116	21.2323	±	4.41721
Axial, σz	93.0198	±	8.41146	32.8313	±	10.1715	43.5473	±	16.959
Linearized material stiffness (MPa)
Circumferential,Cqqqq	0.474299	±	0.060082	0.232244	±	0.0406211	0.139153	±	0.0379531
Axial, Czzzz	1.32547	±	0.164946	0.743885	±	0.219185	0.544685	±	0.232871
Stored elastic energy (kPa)	17.3005	±	1.53434	4.16382	±	1.72079	7.09003	±	2.09561

## Sheet: SMA2 Tables Treatment
	MA - Systolic pressure
	Wt			LmnaG609G			LmnaG609G + L(P100)			LmnaG609G + L(P21)
	n	=	5	n	=	5	n	=	4	n	=	5
Unloaded dimensions
Wall thickness (μm)	49.9637	±	1.66423	55.1255	±	5.16079	49.8391	±	0.67795	50.9752	±	2.48616
Outer diameter (μm)	224.599	±	8.02448	224.522	±	9.9992	225.319	±	6.52044	167.138	±	12.2319
Axial length (mm)	2.654	±	0.277914	3.444	±	0.518745	2.935	±	0.45843	4.938	±	0.273704
Loaded dimensions	P	=	75.6086	P	=	60.6104	P	=	60.6059	P	=	60.604
Outer diameter (μm)	281.796	±	11.26	233.794	±	8.33163	243.333	±	9.56558	184.384	±	18.6673
Wall thickness (μm)	19.0525	±	0.864253	35.1564	±	4.011	25.9576	±	1.29277	26.6955	±	3.46134
Inner radius (µm)	121.845	±	5.42808	81.7404	±	1.95099	95.7087	±	5.4962	65.4967	±	9.892
In vivo axial stretch (λziv)	1.74862	±	0.0356877	1.36449	±	0.095368	1.5599	±	0.0449938	1.47312	±	0.0677698
In vivo Circumferential Stretch (λϑ)	1.50512	±	0.0286853	1.17779	±	0.0416809	1.23835	±	0.0362869	1.35128	±	0.0893099
Cauchy stresses (kPa)
Circumferential, σϑ	64.9307	±	3.69012	20.1007	±	3.00053	30.1874	±	2.94074	21.5839	±	4.4746
Axial, σz	109.315	±	8.94039	33.0041	±	10.2067	51.2684	±	7.93496	43.6757	±	16.9891
Linearized material stiffness (MPa)
Circumferential,Cqqqq	0.764181	±	0.0946771	0.236384	±	0.041306	0.274132	±	0.0281366	0.14189	±	0.0385896
Axial, Czzzz	1.8548	±	0.257468	0.750656	±	0.221758	0.662833	±	0.153841	0.547274	±	0.233158
Stored elastic energy (kPa)	18.9117	±	1.56029	4.19408	±	1.72429	8.75032	±	1.80731	7.14777	±	2.108
	MA - Fixed pressure
	Wt			LmnaG609G			LmnaG609G + L(P100)			LmnaG609G + L(P21)
	n	=	5	n	=	5	n	=	4	n	=	5
Unloaded dimensions
Wall thickness (μm)	49.9637	±	1.66423	55.1255	±	5.16079	49.8391	±	0.67795	50.9752	±	2.48616
Outer diameter (μm)	224.599	±	8.02448	224.522	±	9.9992	225.319	±	6.52044	167.138	±	12.2319
Axial length (mm)	2.654	±	0.277914	3.444	±	0.518745	2.935	±	0.45843	4.938	±	0.273704
Loaded dimensions	P	=	60.0051	P	=	60.0083	P	=	60.0044	P	=	60.0039
Outer diameter (μm)	274.906	±	11.2838	233.587	±	8.31943	243.055	±	9.55169	184.043	±	18.6823
Wall thickness (μm)	19.6126	±	0.886262	35.202	±	4.02013	25.9955	±	1.29546	26.7675	±	3.46427
Inner radius (µm)	117.841	±	5.46455	81.5913	±	1.94838	95.5319	±	5.49111	65.254	±	9.9027
In vivo axial stretch (λziv)	1.74862	±	0.0356877	1.36449	±	0.095368	1.5599	±	0.0449938	1.47312	±	0.0677698
In vivo circumferential stretch (λϑ)	1.46202	±	0.0264343	1.17629	±	0.0415709	1.23655	±	0.0362634	1.34752	±	0.0892724
Cauchy Stresses (kPa)
Circumferential, σϑ	48.4257	±	2.8795	19.8406	±	2.96116	29.7896	±	2.90393	21.2323	±	4.41721
Axial, σz	93.0198	±	8.41146	32.8313	±	10.1715	51.0638	±	7.88909	43.5473	±	16.959
Linearized material stiffness (MPa)
Circumferential,Cqqqq	0.474299	±	0.060082	0.232244	±	0.0406211	0.268122	±	0.0269541	0.139153	±	0.0379531
Axial, Czzzz	1.32547	±	0.164946	0.743885	±	0.219185	0.658319	±	0.153263	0.544685	±	0.232871
Stored elastic energy (kPa)	17.3005	±	1.53434	4.16382	±	1.72079	8.70685	±	1.80389	7.09003	±	2.09561

## Sheet: DTA Maturation Tables
	DTA - Systolic Pressure
	P42 - GG			P100 - GG			P140 - GG			P168 - GG			P168 - WT
	n	=	5	n	=	5	n	=	5	n	=	5	n	=	5
Unloaded dimensions
Wall thickness (μm)	96.8495	±	3.04752	106.316	±	3.13769	141.534	±	7.00304	132.408	±	6.08718	97.8834	±	2.4394
Outer diameter (μm)	703.345	±	19.334	727.221	±	24.5429	844.082	±	57.4753	939.373	±	20.5413	795.623	±	7.76749
Axial length (mm)	4.44	±	0.217899	4.572	±	0.130668	5.776	±	0.322189	5.282	±	0.0824864	4.634	±	0.15374
Loaded dimensions	P	=	90.8358	P	=	101.001	P	=	101.006	P	=	101.015	P	=	126.001
Outer diameter (μm)	1025.2	±	43.3083	1032.98	±	29.624	996.233	±	27.3786	973.103	±	20.1484	1259.23	±	15.9585
Wall thickness (μm)	39.0757	±	0.316441	46.4042	±	2.22664	98.7162	±	11.7535	115.321	±	7.43839	35.1398	±	1.29303
Inner radius (µm)	473.525	±	21.5143	470.086	±	14.4013	399.4	±	13.4927	371.23	±	14.5324	594.473	±	8.16684
In vivo axial stretch (λziv)	1.52514	±	0.0155999	1.44495	±	0.0305228	1.14144	±	0.0180864	1.08545	±	0.0263756	1.59071	±	0.0165708
In vivo Circumferential Stretch (λϑ)	1.62385	±	0.0343746	1.59365	±	0.0424088	1.30042	±	0.0865337	1.06556	±	0.0368034	1.75426	±	0.0108697
Cauchy stresses (kPa)
Circumferential, σϑ	146.695	±	6.30799	137.6	±	7.41373	58.4241	±	8.5888	44.4035	±	4.26807	285.888	±	12.1506
Axial, σz	168.936	±	3.81517	161.493	±	11.6769	54.7441	±	8.7941	67.3905	±	17.2974	259.4	±	11.6221
Linearized material stiffness (MPa)
Circumferential,Cqqqq	2.04123	±	0.0863889	0.562375	±	0.105263	1.86192	±	0.11285	1.71143	±	0.372446	2.29483	±	0.850429
Axial, Czzzz	2.87448	±	0.0473385	0.889285	±	0.105665	2.71099	±	0.272678	3.68904	±	1.56567	4.27943	±	2.03015
Stored elastic energy (kPa)	45.3514	±	2.38554	37.6392	±	2.24126	8.53594	±	2.91989	2.40275	±	0.888232	73.737	±	3.49794
	DTA - Fixed Pressure
	P42 - GG			P100 - GG			P140 - GG			P168 - GG			P168 - WT
	n	=	5	n	=	5	n	=	5	n	=	5	n	=	5
Unloaded dimensions
Wall thickness (μm)	96.8495	±	3.04752	106.316	±	3.13769	141.534	±	7.00304	132.408	±	6.08718	97.8834	±	2.4394
Outer diameter (μm)	703.345	±	19.334	727.221	±	24.5429	844.082	±	57.4753	939.373	±	20.5413	795.623	±	7.76749
Axial length (mm)	4.44	±	0.217899	4.572	±	0.130668	5.776	±	0.322189	5.282	±	0.0824864	4.634	±	0.15374
Loaded dimensions	P	=	100.001	P	=	100.001	P	=	100.003	P	=	100.091	P	=	100.001
Outer diameter (μm)	1060.49	±	43.0381	1029.3	±	29.9793	994.664	±	27.5911	972.843	±	20.1152	1191.55	±	14.5507
Wall thickness (μm)	37.6629	±	0.369581	46.5924	±	2.24754	98.8759	±	11.7145	115.358	±	7.43068	37.2712	±	1.41332
Inner radius (µm)	492.584	±	21.3152	468.058	±	14.6302	398.456	±	13.3449	371.064	±	14.4956	558.503	±	7.59996
In vivo axial stretch (λziv)	1.52514	±	0.0155999	1.44495	±	0.0305228	1.14144	±	0.0180864	1.08545	±	0.0263756	1.59071	±	0.0165708
In vivo circumferential stretch (λϑ)	1.68463	±	0.0327919	1.58731	±	0.0424288	1.29768	±	0.0854847	1.06519	±	0.0367175	1.65426	±	0.0109543
Cauchy Stresses (kPa)
Circumferential, σϑ	174.268	±	6.82828	135.133	±	7.43259	57.5528	±	8.38185	43.9575	±	4.20685	201.095	±	9.04421
Axial, σz	185.388	±	4.25841	159.813	±	11.426	54.3433	±	8.67722	67.1572	±	17.2633	208.766	±	9.09517
Linearized material stiffness (MPa)
Circumferential,Cqqqq	1.22362	±	0.0527613	0.552517	±	0.103663	1.11399	±	0.0653309	1.69405	±	0.370184	2.26952	±	0.857821
Axial, Czzzz	2.03249	±	0.0349285	0.882573	±	0.103729	1.88517	±	0.168499	3.68465	±	1.56718	4.27381	±	2.03212
Stored elastic energy (kPa)	51.2074	±	2.40266	36.9029	±	2.30153	8.40226	±	2.86195	2.38714	±	0.881108	59.698	±	3.16832

## Sheet: SMA2 Maturation Tables
	MA - Systolic Pressure
	P42 - GG			P100 - GG			P140 - GG			P168 - GG			P168 - WT
	n	=	5	n	=	5	n	=	5	n	=	5	n	=	5
Unloaded dimensions
Wall thickness (μm)	46.1151	±	2.56504	40.1864	±	4.74953	41.4539	±	3.1176	55.1255	±	5.16079	49.9637	±	1.66423
Outer diameter (μm)	198.125	±	9.81772	198.957	±	8.87044	217.249	±	10.6311	224.522	±	9.9992	224.599	±	8.02448
Axial length (mm)	2.542	±	0.178617	3.85	±	0.381864	6.15	±	1.35734	3.444	±	0.518745	2.654	±	0.277914
Loaded dimensions	P	=	54.5054	P	=	60.6053	P	=	60.6061	P	=	60.6104	P	=	75.6086
Outer diameter (μm)	212.306	±	16.2619	217.211	±	16.9223	231.813	±	3.13032	233.794	±	8.33163	281.796	±	11.26
Wall thickness (μm)	22.2355	±	1.99718	18.3321	±	1.17355	26.7259	±	5.3443	35.1564	±	4.011	19.0525	±	0.864253
Inner radius (µm)	83.9176	±	8.13323	90.2734	±	7.87077	89.1808	±	4.68266	81.7404	±	1.95099	121.845	±	5.42808
In vivo axial stretch (λziv)	1.69909	±	0.0999864	1.72777	±	0.0156755	1.42921	±	0.137128	1.36449	±	0.095368	1.74862	±	0.0356877
In vivo Circumferential Stretch (λϑ)	1.24735	±	0.0630645	1.25753	±	0.0893114	1.18258	±	0.0750472	1.17779	±	0.0416809	1.50512	±	0.0286853
Cauchy stresses (kPa)
Circumferential, σϑ	28.3437	±	3.71752	40.1065	±	3.4736	31.5441	±	5.97104	20.1007	±	3.00053	64.9307	±	3.69012
Axial, σz	82.2364	±	29.4394	107.175	±	10.0769	69.6364	±	13.2761	33.0041	±	10.2067	109.315	±	8.94039
Linearized material stiffness (MPa)
Circumferential,Cqqqq	1.38078	±	0.297631	0.220879	±	0.034703	0.764181	±	0.0946771	0.236384	±	0.041306	0.274132	±	0.0281366
Axial, Czzzz	2.29559	±	0.570076	1.83752	±	0.956245	1.8548	±	0.257468	0.750656	±	0.221758	0.662833	±	0.153841
Stored elastic energy (kPa)	11.8763	±	2.74855	16.1125	±	1.17767	9.32271	±	3.01933	4.19408	±	1.72429	18.9117	±	1.56029
	MA - Fixed Pressure
	P42 - GG			P100 - GG			P140 - GG			P168 - GG			P168 - WT
	n	=	5	n	=	5	n	=	5	n	=	5	n	=	5
Unloaded dimensions
Wall thickness (μm)	46.1151	±	2.56504	40.1864	±	4.74953	41.4539	±	3.1176	55.1255	±	5.16079	49.9637	±	1.66423
Outer diameter (μm)	198.125	±	9.81772	198.957	±	8.87044	217.249	±	10.6311	224.522	±	9.9992	224.599	±	8.02448
Axial length (mm)	2.542	±	0.178617	3.85	±	0.381864	6.15	±	1.35734	3.444	±	0.518745	2.654	±	0.277914
Loaded dimensions	P	=	60.0058	P	=	60.0054	P	=	60.0056	P	=	60.0083	P	=	60.0051
Outer diameter (μm)	215.039	±	16.5804	216.955	±	16.8957	207.905	±	22.6218	233.587	±	8.31943	274.906	±	11.2838
Wall thickness (μm)	21.8915	±	1.98824	18.3587	±	1.17712	22.1693	±	1.90222	35.202	±	4.02013	19.6126	±	0.886262
Inner radius (µm)	85.6281	±	8.32223	90.1188	±	7.85801	81.7831	±	11.705	81.5913	±	1.94838	117.841	±	5.46455
In vivo axial stretch (λziv)	1.69909	±	0.0999864	1.72777	±	0.0156755	1.59821	±	0.13043	1.36449	±	0.095368	1.74862	±	0.0356877
In vivo circumferential stretch (λϑ)	1.26759	±	0.0650875	1.25574	±	0.0891573	1.16783	±	0.084806	1.17629	±	0.0415709	1.46202	±	0.0264343
Cauchy Stresses (kPa)
Circumferential, σϑ	32.3749	±	4.29038	39.5882	±	3.43917	31.0209	±	5.91642	19.8406	±	2.96116	48.4257	±	2.8795
Axial, σz	85.0822	±	29.528	106.561	±	10.0304	108.135	±	44.901	32.8313	±	10.1715	93.0198	±	8.41146
Linearized material stiffness (MPa)
Circumferential,Cqqqq	0.912934	±	0.199341	0.215418	±	0.0335359	0.474299	±	0.060082	0.232244	±	0.0406211	0.268122	±	0.0269541
Axial, Czzzz	1.5958	±	0.381641	1.81878	±	0.952534	1.32547	±	0.164946	0.743885	±	0.219185	0.658319	±	0.153263
Stored elastic energy (kPa)	12.3757	±	2.75817	16.0563	±	1.17361	13.8305	±	3.40485	4.16382	±	1.72079	17.3005	±	1.53434
