# Supplementary material for: Lonafarnib improves cardiovascular function and survival in a mouse model of Hutchinson-Gilford progeria syndrome
Source: eLife. 2023 Mar 17;12:e82728. doi: 10.7554/eLife.82728 (PMC10023154; doi:10.7554/eLife.82728)
Supplement: Source data 2. [file elife-82728-data2.xlsx]

## Sheet: Active testing - DTA
DTA	Agonist induced contraction
	Region	Date	Personnel	Mouse #	Geometric configurations					100 mM KCl																				1 uM PE																EC function (10 uM Ach/1mM L-NAME)
					Unloaded Configuration (2mmHg)			Loaded Configuration		Basal						Contracted						Contractile Changes								Basal						Contracted						Contractile Changes				Dilated
					L (mm)	H (μm)	OD (μm)	P (mmHg)	λz	od (μm)	h (μm)	ir (μm)	λθ	σϑ (kPa)	σz (kPa)	od (μm)	h (μm)	ir (μm)	λθ	σϑ (kPa)	σz (kPa)	Dod (μm)	Dod (%)	Dir (%)	Δσϑ (kPa)	Δσϑ (%)	Δσz (kPa)	Δσz (%)	Δσz/Δσϑ (%)	od (μm)	h (μm)	ir (μm)	λθ	σϑ (kPa)	σz (kPa)	od (μm)	h (μm)	ir (μm)	λθ	σϑ (kPa)	σz (kPa)	Dod (%)	Dir (%)	Δσϑ (%)	Dσϑ (% KCl)	ir Ach (μm)	σϑ (kPa)	ir L-NAME (μm)	σϑ (kPa)
	WT - P42	2020-10-07	SM	WT498	5.24	106.17	762.311	70	1.46584	992.501	50.4473	445.803	1.43575	82.4705	151.693	807.74	63.8892	339.981	1.13368	49.6616	133.79	-184.76	-18.6156	-23.7374	-32.8089	-39.7826	-17.9029	-11.8021	29.6664	977.601	51.3055	437.495	1.41173	79.5798	144.766	813.591	50.0787	356.717	1.16364	49.6857	132.753	-16.7768	-18.4638	-37.5649	91.1159	405.119	68.8277	275.012	33.8041
		2020-10-08	SM	WT503	4.64	95.5698	720.584	70	1.43836	952.842	45.7833	430.638	1.45126	87.7807	161.941	770.173	45.8491	339.237	1.15889	52.2686	142.762	-182.67	-19.171	-21.2245	-35.5121	-40.4555	-19.1785	-11.8429	29.2739	949.836	45.9437	428.974	1.44619	87.1362	157.415	852.002	45.7309	380.27	1.29	65.3635	145.486	-10.3	-11.3536	-24.9869	61.3105	416.816	82.5017	283.711	40.3598
		2020-10-12	SM	WT519	4.2	99.6295	729.241	70	1.4	932.429	50.8227	415.392	1.40024	76.2769	157.841	753.584	65.0765	311.716	1.09354	44.7021	136.543	-178.845	-19.1805	-24.9586	-31.5748	-41.395	-21.2975	-13.4931	32.5959	925.608	51.2437	411.561	1.38874	74.9526	146.645	796.625	50.1207	348.192	1.18566	51.2943	135.324	-13.935	-15.3972	-31.5644	74.9279	394.408	69.1723	267.242	33.8519
		2019-03-12	SM	WTM_6W_M1	5.36	88.7475	761.799	70	1.4916	1114.12	37.1846	519.873	1.60007	135.143	209.842	902.519	46.797	404.462	1.27141	85.3265	194.368	-211.597	-18.9924	-22.1998	-49.8169	-38.1806	-15.4743	-7.37426	19.3142	1121.31	36.9291	523.727	1.61114	137.02	200.117	843.081	36.0945	385.446	1.199	104.327	185.454	-24.813	-26.4032	-32.6935	65.6283	461.901	108.576	320.419	56.5385
		2019-03-13	SM	WTM_6W_M1	5.26	93.4893	705.378	70	1.49677	973	41.0079	445.492	1.52314	106.051	239.366	834.161	48.6553	368.425	1.28374	75.3336	217.023	-138.838	-14.2691	-17.2992	-30.7172	-30.2977	-22.343	-9.33427	30.8085	993.559	40.084	456.695	1.55825	110.996	223.852	815.181	39.8014	367.789	1.26719	90.9045	206.567	-17.9534	-19.4673	-20.0917	65.4096	401.958	87.9911	319.721	58.3874
		mean			4.94	96.7213	735.863	70	1.45851	992.977	45.0492	451.44	1.48209	97.5444	184.137	813.635	54.0534	352.764	1.18825	61.4585	164.897	-179.342	-18.0457	-21.8839	-36.086	-38.0223	-19.2393	-10.7693	28.3318	993.583	45.1012	451.69	1.48321	97.937	174.559	824.096	44.3653	367.683	1.2211	72.3149	161.117	-16.7556	-18.217	-29.3803	71.6784	416.04	83.4137	293.221	44.5883
		SD			0.501597	6.57824	25.391	0	0.0401311	71.3281	5.9413	40.2569	0.0796908	23.7745	38.5609	58.846	9.58325	35.1757	0.0849156	17.7947	38.2334	26.0845	2.12354	2.93442	7.88641	4.4746	2.73104	2.40955	5.20343	76.0007	6.49786	43.423	0.0966981	25.8841	35.5098	22.8235	6.26235	15.6055	0.0545854	24.3546	33.0611	5.38486	5.56095	6.86139	11.9558	26.8766	16.3591	25.1935	12.0693
		SEM			0.224321	2.94188	11.3552	0	0.0179472	31.8989	2.65703	18.0034	0.0356388	10.6323	17.245	26.3167	4.28576	15.7311	0.0379754	7.95801	17.0985	11.6654	0.949678	1.31231	3.52691	2.0011	1.22136	1.07758	2.32705	33.9886	2.90593	19.4194	0.0432447	11.5757	15.8805	10.207	2.80061	6.979	0.0244113	10.8917	14.7854	2.40818	2.48693	3.06851	5.34682	12.0196	7.31601	11.2669	5.39756
	GG - P42	2019-12-18	SM	GG46	5.18	105.426	729.246	70	1.44961	909.486	52.9687	401.774	1.37302	70.7874	143.292	726.48	69.0043	294.236	1.05395	39.7935	123.586	-183.006	-20.122	-26.766	-30.9939	-43.7845	-19.7063	-13.7525	31.4096	899.408	53.6421	396.062	1.35579	68.905	132.471	751.299	53.7281	321.921	1.11822	43.1866	119.439	-16.4674	-18.7195	-37.3245	82.9791	377.908	63.0993	229.996	25.8397
		2019-12-18	SM	GG47	4.6	97.4839	756.619	70	1.40239	951.899	50.8499	425.099	1.36702	78.0178	135.358	781.283	63.8655	326.776	1.08842	47.7504	118.986	-170.616	-17.9238	-23.1296	-30.2675	-38.7956	-16.3726	-12.0957	31.1781	949.187	51.0126	423.581	1.36266	77.4912	127.072	828.62	49.9688	364.341	1.18132	55.2137	113.981	-12.7022	-13.9855	-28.7485	73.6022	406.792	71.7922	290.719	38.7587
		2019-12-19	SM	GG50	3.92	98.3558	664.38	70	1.39821	859.27	49.1486	380.486	1.43125	72.2472	153.672	706.326	61.7736	291.389	1.13874	44.0214	132.913	-152.944	-17.7993	-23.4166	-28.2258	-39.0683	-20.7592	-13.5088	34.5773	853.01	49.5565	376.948	1.41947	70.9863	145.198	768.589	49.8467	334.448	1.26981	53.8167	132.687	-9.89676	-11.2749	-24.1872	60.8295	367.996	67.8476	239.151	31.0755
		2019-12-19	SM	GG60	4.12	96.5938	711.88	70	1.42597	931.604	47.1223	418.68	1.43751	82.918	163.546	767.585	58.8035	324.989	1.15195	51.5773	142.249	-164.019	-17.6061	-22.3777	-31.3407	-37.7972	-21.2976	-13.0224	34.4533	934.023	46.9867	420.025	1.44166	83.4245	146.538	815.531	47.3463	360.419	1.2485	60.1263	138.036	-12.6862	-14.1909	-27.9273	74.3386	393.039	73.5676	279.418	39.5339
		2020-03-09	SM	GG163	4.38	86.3877	654.601	70	1.36461	768.395	50.0769	334.121	1.26417	62.2672	114.435	673.41	50.1761	286.529	1.09683	44.3834	99.018	-94.9853	-12.3615	-14.2439	-17.8839	-28.7212	-15.4168	-13.4721	46.9066	765.844	50.2689	332.653	1.25934	61.7569	108.688	630.205	49.8708	265.232	1.02133	36.9233	93.7029	-17.7109	-20.2677	-40.212	138.861	303.152	51.9677	254.148	38.2381
		mean			4.44	96.8495	703.345	70	1.40816	884.131	50.0333	392.032	1.37459	73.2475	142.061	731.017	60.7246	304.784	1.10598	45.5052	123.35	-153.114	-17.1625	-21.9867	-27.7423	-37.6334	-18.7105	-13.1703	35.705	880.294	50.2933	389.854	1.36778	72.5128	131.993	758.849	50.1521	329.272	1.16784	49.8533	119.569	-13.8927	-15.6877	-31.6799	86.122	369.777	65.6549	258.686	34.6892
		SD			0.487237	6.81447	43.2322	0	0.0318759	73.3177	2.15301	36.693	0.0696811	7.80853	18.7488	44.1946	6.97283	19.4667	0.039641	4.41572	16.2769	34.2702	2.87183	4.64478	5.6418	5.49317	2.655	0.65598	6.46641	73.8948	2.40879	37.1646	0.0708158	8.28983	15.4392	78.7113	2.28397	39.9436	0.101257	9.508	17.417	3.16421	3.70064	6.77262	30.5227	40.0605	8.64517	25.8901	5.99999
		SEM			0.217899	3.04752	19.334	0	0.0142553	32.7887	0.962855	16.4096	0.0311623	3.49208	8.38473	19.7644	3.11834	8.70578	0.017728	1.97477	7.27925	15.3261	1.28432	2.07721	2.52309	2.45662	1.18735	0.293363	2.89187	33.0467	1.07724	16.6205	0.0316698	3.70732	6.90461	35.2008	1.02142	17.8633	0.0452834	4.25211	7.78912	1.41508	1.65497	3.02881	13.6502	17.9156	3.86624	11.5784	2.68328
	Wt - P100	2017-03-31	SM	P17 F	5.31	99.1106	723.158	90	1.53672	1088.04	38.3421	505.68	1.68209	158.248	171.836	908.878	46.6805	407.758	1.38162	104.811	143.277	-179.167	-16.4669	-19.3644	-53.4372	-33.7681	-28.5592	-16.62	49.2182	1077.44	38.7484	499.974	1.66445	154.822	164.529	873.146	48.8254	387.748	1.32093	95.2887	141.525	-18.9614	-22.4464	-38.4526	111.407
		2018-10-16	SM	P157 M	5.61	105.845	768.248	90	1.46524	1096.23	45.5418	502.574	1.58618	132.412	197.812	879.045	58.3012	381.221	1.23904	78.4581	168.527	-217.186	-19.8121	-24.1462	-53.9538	-40.7469	-29.2846	-14.8043	36.3323	1130.07	44.0606	520.975	1.6395	141.874	198.467	861.988	43.2944	387.699	1.23594	74.7149	173.116	-23.7227	-25.582	-47.3373	124.476
		2018-10-24	SM	P162 M	5.03	86.3972	770.06	90	1.46501	1028.57	40.8182	473.466	1.44479	139.179	222.09	810.608	53.2342	352.07	1.10782	79.3553	182.656	-217.961	-21.1907	-25.64	-59.8236	-42.9833	-39.4344	-17.756	41.3092	1018.5	41.2572	467.992	1.42942	136.106	207.066	913.7	41.0277	415.822	1.27647	105.906	193.127	-10.2896	-11.1476	-22.1882	50.4809
		2019-01-11	SM	P199 M	5.9	103.831	794.676	90	1.42542	1177.61	44.4074	544.4	1.64032	147.096	165.914	962.566	55.4773	425.805	1.31301	92.0944	140.593	-215.049	-18.2614	-21.7845	-55.0013	-37.3915	-25.3207	-15.2613	40.815	1206.67	43.2544	560.08	1.68405	155.367	155.636	926.828	57.9147	405.499	1.25775	84.0115	132.57	-23.1913	-27.5998	-45.9269	129.733
		2019-01-28	SM	P210 F	4.83	96.8925	798.964	90	1.50166	1124.51	41.8414	520.413	1.5421	149.238	198.886	1016	46.737	461.261	1.38057	118.42	179.076	-108.512	-9.64975	-11.3663	-30.8185	-20.6506	-19.8091	-9.96004	48.2313	1159.36	40.4873	539.194	1.59368	159.795	192.655	928.001	40.6598	423.34	1.26389	95.7	172.179	-19.956	-21.4864	-40.1108	207.976
		mean			5.3425	98.2416	782.987	90	1.46433	1106.73	43.1522	510.213	1.55335	141.981	196.175	917.054	53.4374	405.089	1.26011	92.0818	167.713	-189.677	-17.2285	-20.7342	-49.8993	-35.4431	-28.4622	-14.4454	41.6719	1128.65	42.2649	522.06	1.58666	148.286	188.456	907.629	45.7242	408.09	1.25851	90.0832	167.748	-19.2899	-21.454	-38.8908	128.167	#DIV/0!	#DIV/0!	#DIV/0!	#DIV/0!
		SD			0.497552	8.77823	16.0856	0	0.0311354	62.0754	2.19483	29.8968	0.0827707	7.70816	23.0748	90.6206	4.92456	48.1843	0.116828	18.6302	19.0486	54.1239	5.19225	6.44382	12.9748	10.1259	8.28272	3.25951	4.91267	79.9284	1.67123	39.4277	0.111131	11.1364	22.6666	31.1104	8.2101	15.4364	0.0169419	13.6011	25.3643	6.22683	7.32651	11.566	64.3446	#DIV/0!	#DIV/0!	#DIV/0!	#DIV/0!
		SEM			0.248776	4.38911	8.04282	0	0.0155677	31.0377	1.09742	14.9484	0.0413854	3.85408	11.5374	45.3103	2.46228	24.0921	0.058414	9.31508	9.5243	27.062	2.59612	3.22191	6.4874	5.06293	4.14136	1.62975	2.45634	39.9642	0.835617	19.7138	0.0555654	5.5682	11.3333	15.5552	4.10505	7.71822	0.00847097	6.80057	12.6822	3.11341	3.66325	5.78298	32.1723	#DIV/0!	#DIV/0!	#DIV/0!	#DIV/0!
	GG - P100	2017-03-29	SM	P18 F	4.52	94.3123	742.15	90	1.34646	984.616	48.4729	443.835	1.44503	109.865	133.255	824.613	59.2922	353.014	1.18135	71.4384	109.327	-160.003	-16.2503	-20.4628	-38.4269	-34.9763	-23.9284	-17.9569	51.3401	980.104	48.7206	441.331	1.43768	108.69	114.187	839.478	48.1925	371.546	1.22143	74.1494	99.8539	-14.3481	-15.8123	-31.779	89.8866
		2017-03-30	SM	P14 M	4.54	107.712	766.557	90	1.37269	968.558	56.6954	427.584	1.38403	90.4923	126.245	851.673	65.7834	360.053	1.19283	65.6732	113.976	-116.886	-12.068	-15.7936	-24.8191	-27.4267	-12.2698	-9.71901	35.4363	990.033	55.3087	439.708	1.41873	95.3912	129.182	895.88	55.0611	392.879	1.2762	74.6945	120.08	-9.51006	-10.65	-21.6966	83.3901
		2018-11-14	SM	P176 F	4.97	109.84	781.368	90	1.27746	1011.15	60.7535	444.821	1.41527	87.8522	111.926	905.113	69.0627	383.494	1.245	66.6274	97.7066	-106.037	-10.4868	-13.787	-21.2248	-24.1597	-14.2191	-12.7041	52.5838	1020.13	60.1468	449.918	1.42955	89.7549	106.534	929.64	66.9284	397.891	1.2847	71.3333	95.1571	-8.87037	-11.5635	-20.5244	86.7929
		2018-11-15	SM	P178 M	4.67	112.443	700.113	90	1.41221	908.959	54.7794	399.7	1.4535	87.5496	129.49	847.324	59.3846	364.277	1.34078	73.6031	116.429	-61.6347	-6.7808	-8.86227	-13.9465	-15.9298	-13.0615	-10.0868	63.3203	940.028	52.7351	417.279	1.50985	94.9434	123.494	824.918	61.2739	351.185	1.29944	68.7698	115.249	-12.2454	-15.8393	-27.5676	187.672
		2018-11-16	SM	P179 M	4.16	107.27	645.918	90	1.3976	903.745	48.3311	403.541	1.58808	100.184	127.542	760.627	58.9176	321.396	1.30272	65.4535	117.654	-143.118	-15.8361	-20.3561	-34.7308	-34.6669	-9.88865	-7.75322	22.3649	871.795	50.3284	385.569	1.52505	91.9236	124.652	856.491	50.1495	378.096	1.49697	85.9413	119.168	-1.7555	-1.93827	-6.50798	17.225
		mean			4.585	109.316	723.489	90	1.36499	948.103	55.1398	418.912	1.46022	91.5196	123.801	841.184	63.2871	357.305	1.27033	67.8393	111.441	-106.919	-11.2929	-14.6998	-23.6803	-25.5458	-12.3598	-10.0658	43.4263	955.496	54.6297	423.118	1.4708	93.0033	120.965	876.732	58.3532	380.013	1.33933	75.1847	112.414	-8.09534	-9.99776	-19.0741	93.7699	#DIV/0!	#DIV/0!	#DIV/0!	#DIV/0!
		SD			0.335708	2.36685	62.6326	0	0.0605871	51.294	5.17757	21.2278	0.0898462	5.92573	8.02843	59.7885	4.96355	26.0223	0.0649649	3.87619	9.2833	33.9664	3.75279	4.76447	8.64458	7.77004	1.83159	2.03546	18.1389	64.8468	4.20281	28.5041	0.0544085	2.65729	9.92892	45.6812	7.30757	20.9755	0.105534	7.5703	11.6936	4.47284	5.82969	8.92613	70.3161	#DIV/0!	#DIV/0!	#DIV/0!	#DIV/0!
		SEM			0.167854	1.18342	31.3163	0	0.0302935	25.647	2.58878	10.6139	0.0449231	2.96286	4.01421	29.8943	2.48177	13.0111	0.0324825	1.9381	4.64165	16.9832	1.87639	2.38224	4.32229	3.88502	0.915794	1.01773	9.06943	32.4234	2.1014	14.2521	0.0272043	1.32865	4.96446	22.8406	3.65379	10.4877	0.0527668	3.78515	5.84681	2.23642	2.91485	4.46306	35.158	#DIV/0!	#DIV/0!	#DIV/0!	#DIV/0!
	Wt - P140	2017-06-20	SM	P22	5.44	108.673	810.184	90	1.52776	1223.74	42.2342	569.637	1.68423	161.835	177.667	1048.21	49.9891	474.115	1.42296	113.801	151.657	-175.534	-14.344	-16.7689	-48.0336	-29.6806	-26.0108	-14.6402	49.3257	1219.95	42.3754	567.598	1.67862	160.718	173.591	938.972	42.0226	427.464	1.2786	87.2657	145.417	-23.0317	-24.6891	-45.7027	152.919
		2017-10-16	SM	P65	4.56	103.926	840.89	90	1.51667	1131.74	46.5337	519.339	1.47254	133.912	189.143	950.984	56.4529	419.039	1.21381	89.0648	170.58	-180.761	-15.9719	-19.3129	-44.8476	-33.4903	-18.5632	-9.81434	29.305	1133.34	46.4622	520.21	1.47481	134.343	189.135	878.347	61.8481	377.325	1.10792	73.2027	168.277	-22.4995	-27.4667	-45.5108	136.33
		2017-07-18	SM	P32	5.31	116.222	865.787	90	1.51808	1251.24	47.6802	577.938	1.60567	145.439	192.573	1014.82	60.1077	447.304	1.27369	89.2917	153.339	-236.412	-18.8943	-22.6034	-56.1473	-38.6054	-39.2331	-20.3732	52.7728	1243.61	47.9971	573.806	1.59507	143.446	181.319	980.067	47.5007	442.533	1.24414	81.3608	146.471	-21.1915	-22.8776	-43.2812	110.575
		2017-07-24	SM	P35	4.89	106.558	857.503	90	1.56155	1201.04	44.2998	556.218	1.54037	150.654	202.845	951.065	57.3365	418.196	1.19014	87.5158	165.433	-249.972	-20.813	-24.8144	-63.1383	-41.9095	-37.4115	-18.4434	44.0078	1214.09	43.7861	563.261	1.55845	154.351	197.04	900.559	43.7461	406.533	1.14098	75.9463	160.289	-25.8246	-27.825	-50.7965	124.18
		2017-08-08	SM	P40	5.26	103.546	805.543	90	1.48384	1147.72	44.3996	529.462	1.57169	143.085	178.334	940.216	55.3618	414.746	1.26048	89.8897	158.214	-207.507	-18.0799	-21.6664	-53.195	-37.1773	-20.1199	-11.2822	30.347	1165.06	43.685	538.843	1.5974	148.002	181.402	954.547	43.5065	433.767	1.29778	93.2279	158.146	-18.0686	-19.5003	-37.009	102.968
		mean			5.092	107.785	835.981	90	1.52158	1191.1	45.0295	550.519	1.5749	146.985	188.112	981.06	55.8496	434.68	1.27222	93.9126	159.845	-210.037	-17.6206	-21.0332	-53.0724	-36.1726	-28.2677	-14.9107	41.1517	1195.21	44.8612	552.744	1.58087	148.172	184.497	930.498	47.7248	417.524	1.21389	82.2007	155.72	-22.1232	-24.4717	-44.46	125.395	#DIV/0!	#DIV/0!	#DIV/0!	#DIV/0!
		SD			0.360791	5.15597	27.2381	0	0.0278243	50.4608	2.12318	25.3248	0.0783899	10.2771	10.5204	47.7532	3.71785	25.6332	0.0908449	11.1525	8.03902	32.956	2.52383	3.09467	7.13845	4.72176	9.6113	4.51473	10.8063	44.8539	2.29756	22.5089	0.0737936	10.1142	8.90861	40.9981	8.1495	26.0999	0.0846841	8.18595	9.69681	2.82734	3.44666	4.99265	20.0075	#DIV/0!	#DIV/0!	#DIV/0!	#DIV/0!
		SEM			0.161351	2.30582	12.1813	0	0.0124434	22.5668	0.949514	11.3256	0.035057	4.59605	4.70489	21.3559	1.66267	11.4635	0.0406271	4.98755	3.59516	14.7384	1.12869	1.38398	3.19241	2.11164	4.2983	2.01905	4.83274	20.0593	1.0275	10.0663	0.0330015	4.5232	3.98405	18.3349	3.64457	11.6722	0.0378719	3.66087	4.33655	1.26442	1.54139	2.23278	8.94761	#DIV/0!	#DIV/0!	#DIV/0!	#DIV/0!
	GG - P140	2017-06-19	SM	m1	5.15	109.979	744.626	90	1.33748	861.854	65.5344	365.392	1.25474	66.9003	133.75	813.612	70.1982	336.608	1.17138	57.5355	128.957	-48.2417	-5.59743	-7.87773	-9.36477	-13.9981	-4.79292	-3.58349	25.5998	890.65	63.058	382.267	1.30402	72.7385	136.719	763.267	75.9247	305.709	1.08303	48.3129	124.997	-14.3022	-20.0273	-33.58	260.824
		2017-09-14	SM	m2	4.89	110.789	791.522	90	1.22699	926.557	71.9199	391.359	1.25547	65.2926	85.0954	929.331	71.6659	393	1.25991	65.7987	84.6211	2.77442	0.299434	0.419348	0.506135	0.77518	-0.474341	-0.557423	-71.9088	930.43	71.5659	393.649	1.26168	65.9995	82.7455	929.489	71.6516	393.093	1.26017	65.8275	83.2512	-0.101135	-0.141279	-0.260645	-33.9878
		2017-11-07	SM	m3	4.71	119.208	801.428	90	1.12187	920.314	86.9913	373.166	1.22149	51.4712	56.721	912.828	87.8737	368.54	1.20922	50.3227	55.9919	-7.48592	-0.813409	-1.2395	-1.14846	-2.23127	-0.729068	-1.28536	57.6065	919.717	87.0609	372.798	1.22051	51.3793	58.1987	911.755	87.1689	368.709	1.20868	49.9448	56.7737	-0.865746	-1.09689	-2.79195	124.905
		2017-07-14	SM	m4	5.42	132.985	907.013	90	1.18672	954.669	101.689	375.646	1.102	44.3245	56.7212	953.097	101.902	374.647	1.0997	44.1141	55.605	-1.5722	-0.164686	-0.266051	-0.210462	-0.47482	-1.1162	-1.96787	414.445	953.633	101.829	374.987	1.10048	44.1857	57.2961	950.971	102.192	373.294	1.09657	43.83	56.5461	-0.279135	-0.45171	-0.805213	169.052
		2017-12-12	SM	m5	5.3	106.458	900.989	90	1.08755	982.242	86.8628	404.258	1.12693	55.8422	47.9555	975.724	86.3381	401.524	1.11938	54.3154	45.7422	-6.5178	-0.663564	-0.676347	-1.52681	-2.73414	-2.21323	-4.61517	168.798	981.28	86.9662	403.674	1.12559	55.6952	47.5165	981.661	86.9253	403.905	1.12612	55.7534	45.3562	0.0387715	0.0572713	0.10442	-3.80907
		mean			5.094	115.884	829.116	90	1.19212	929.127	82.5994	381.964	1.19213	56.7662	76.0486	916.919	83.5956	374.864	1.17192	54.4173	74.1835	-12.2086	-1.38793	-1.92806	-2.34887	-3.73263	-1.86515	-2.40186	118.908	935.142	82.096	385.475	1.20245	57.9997	76.4952	907.429	84.7725	368.942	1.15491	52.7337	73.3848	-3.10188	-4.33199	-7.46668	103.397	#DIV/0!	#DIV/0!	#DIV/0!	#DIV/0!
		SD			0.291942	10.6438	71.6801	0	0.0977809	44.9543	14.205	15.6303	0.0727464	9.47478	35.1696	62.4701	13.0648	25.2152	0.0654046	8.09618	33.8898	20.559	2.39365	3.38053	4.00198	5.90687	1.76628	1.66822	186.217	34.3159	15.0922	13.0289	0.0872576	11.4148	36.0871	84.6967	11.8771	38.1545	0.0764346	8.47296	32.0398	6.27062	8.78484	14.6405	122.397	#DIV/0!	#DIV/0!	#DIV/0!	#DIV/0!
		SEM			0.13056	4.76007	32.0563	0	0.043729	20.1042	6.35269	6.99008	0.0325332	4.23725	15.7283	27.9375	5.84275	11.2766	0.0292498	3.62072	15.156	9.19428	1.07047	1.51182	1.78974	2.64163	0.789903	0.746052	83.2786	15.3466	6.74943	5.8267	0.0390228	5.10487	16.1386	37.8775	5.3116	17.0632	0.0341826	3.78922	14.3286	2.80431	3.9287	6.54745	54.7376	#DIV/0!	#DIV/0!	#DIV/0!	#DIV/0!
	Wt - P168	2020-07-17	SM	WT160	4.84	102.176	812.615	90	1.3595	1104.04	50.6901	501.33	1.48268	118.669	121.544	937.688	60.8976	407.946	1.23415	80.3787	95.7604	-166.352	-15.0676	-18.6272	-38.2907	-32.2667	-25.7835	-21.2133	65.7438	1140.44	48.9175	521.301	1.5364	127.868	119.734	978.082	48.0427	440.998	1.30911	88.2506	95.7084	-14.2362	-15.4043	-30.9832	103.465	499.534	117.859	340.438	57.5219
		2020-08-24	SM	WT249	4.66	89.9875	775.898	90	1.50386	1134.63	37.4066	529.906	1.59965	169.976	192.428	903.504	47.974	403.778	1.24729	100.989	158.46	-231.121	-20.3698	-23.8019	-68.9872	-40.5864	-33.9682	-17.6524	43.4934	1114.54	38.1298	519.139	1.56931	163.364	175.817	883.245	37.39	404.232	1.23319	90.0433	153.153	-20.7523	-22.134	-44.8818	106.282	505.019	154.898	342.637	74.1932
		2020-08-25	SM	WT257	4.04	103.493	793.506	90	1.44554	1097.12	47.0452	501.517	1.52183	127.911	149.513	879.66	60.2919	379.538	1.18747	75.5326	125.715	-217.465	-19.8214	-24.322	-52.3785	-40.9491	-23.7973	-15.9166	38.8692	1105.72	46.6457	506.214	1.53486	130.215	144.845	986.645	46.3367	446.986	1.36274	96.9888	130.453	-10.769	-11.7002	-25.5163	63.4345	488.159	121.476	321.649	55.6724
		2020-09-03	SM	WT269	4.74	98.4222	782.037	90	1.40506	1104.7	45.1966	507.153	1.54985	134.639	156.89	930.527	54.6736	410.59	1.28121	90.1091	126.5	-174.174	-15.7666	-19.0403	-44.53	-33.0736	-30.3899	-19.3702	58.5669	1118.13	44.6065	514.457	1.57036	138.385	143.397	882.312	58.0991	383.057	1.20567	79.11	120.169	-21.0902	-25.5416	-42.8334	133.112	464.372	113.765	297.581	51.121
		2020-09-04	SM	WT268	4.89	95.338	814.057	90	1.44888	1175.79	41.701	546.195	1.57793	157.159	160.295	970.573	51.4544	433.832	1.27883	101.166	137.646	-205.22	-17.4537	-20.572	-55.9927	-35.628	-22.6495	-14.1299	39.6594	1185.64	41.3283	551.494	1.59216	160.115	156.39	987.544	40.7306	453.041	1.31736	101.368	135.849	-16.7083	-17.8521	-36.6903	104.918	528.602	147.55	334.299	62.8824
		mean			4.634	97.8834	795.623	90	1.43257	1123.26	44.4079	517.22	1.54639	141.671	156.134	924.39	55.0583	407.137	1.24579	89.6352	128.816	-198.866	-17.6958	-21.2727	-52.0358	-36.5008	-27.3177	-17.6565	49.2665	1132.89	43.9256	522.521	1.56062	143.989	148.036	943.565	46.1198	425.663	1.28561	91.1521	127.066	-16.7112	-18.5264	-36.181	102.242	497.137	131.11	327.321	60.2782
		SD			0.343773	5.45465	17.3686	0	0.0538797	32.7327	5.08402	20.0056	0.0461163	21.2658	25.3746	34.5844	5.58593	19.3531	0.0383572	11.6905	22.7177	27.8097	2.36411	2.6537	11.7089	4.09007	4.74885	2.78623	12.1627	32.1444	4.27545	17.1996	0.0245725	16.7066	20.4589	55.6146	7.94515	30.4712	0.0645144	8.55998	21.2133	4.38584	5.45496	8.07729	24.9198	23.5164	18.7442	18.5198	8.84697
		SEM			0.15374	2.4394	7.76749	0	0.0240957	14.6385	2.27364	8.94678	0.0206239	9.51034	11.3479	15.4666	2.4981	8.65499	0.0171539	5.22816	10.1597	12.4369	1.05726	1.18677	5.23636	1.82913	2.12375	1.24604	5.43933	14.3754	1.91204	7.69192	0.0109892	7.4714	9.1495	24.8716	3.55318	13.6271	0.0288517	3.82814	9.48686	1.96141	2.43953	3.61227	11.1445	10.5169	8.38268	8.2823	3.95648
	GG - P168	2019-12-31	SM	GG6245	5.24	141.217	963.678	90	1.04008	956.183	136.183	341.909	0.997008	30.1249	50.714	953.152	136.182	340.394	0.993324	29.7199	62.0879	-3.03081	-0.31697	-0.442966	-0.404995	-1.34439	11.3739	22.4275	-1668.23	954.635	136.492	340.825	0.994749	29.9614	53.4578	954.087	136.432	340.611	0.994156	29.8283	52.5912	-0.0573513	-0.0627591	-0.444141	32.8574	344.286	30.4853	342.701	30.2447
		2020-01-21	SM	GG6269	5.5	136.792	993.799	90	1.046	1003.45	128.024	373.703	1.0215	35.0246	51.7322	1004.68	127.596	374.743	1.02342	34.8872	50.4463	1.222	0.12178	0.278172	-0.13737	-0.392211	-1.28584	-2.48557	633.733	1004.88	127.78	374.66	1.02345	35.1812	50.0062	1002.81	127.42	373.987	1.02146	34.9543	49.0514	-0.205629	-0.179512	-0.644985	165.184	375.944	35.392	373.596	35.0071
		2020-02-17	SM	GG6294	5.24	145.256	869.985	90	1.11279	944.225	113.939	358.174	1.14565	37.719	27.5063	945.21	113.54	359.065	1.14756	37.3622	26.6886	0.985565	0.104378	0.248772	-0.356821	-0.945997	-0.8177	-2.97277	314.247	943.745	114.015	357.857	1.14488	37.6605	27.5965	940.983	113.694	356.797	1.14151	37.2683	27.0004	-0.292684	-0.296303	-1.04141	109.915	358.935	37.8601	356.902	37.4839
		2020-08-21	SM	GG251	5.41	111.017	938.422	90	1.00813	933.533	110.739	356.028	0.994428	38.5765	51.8556	931.215	110.725	354.883	0.991643	38.1875	47.6212	-2.31788	-0.248292	-0.321589	-0.389002	-1.00839	-4.23433	-8.16562	809.766	931.593	111.041	354.755	0.991717	38.3338	98.0066	929.257	111.21	353.418	0.98869	37.8354	91.972	-0.250658	-0.376789	-1.3	128.107	353.505	38.0962	359.606	39.3111
		2020-08-22	SM	GG259	5.02	127.759	930.982	90	1.1255	1047.56	95.7977	427.981	1.18493	53.6053	58.0749	1044.19	95.6443	426.453	1.18093	53.1376	53.1448	-3.36306	-0.321038	-0.357052	-0.467657	-0.872409	-4.93005	-8.48913	973.067	1048.32	95.7122	428.449	1.18598	53.7118	53.2475	1046.67	95.4434	427.893	1.18427	52.7455	52.6818	-0.157301	-0.129694	-1.79891	206.61	431.897	54.5005	424.903	52.9071
		mean			5.282	132.408	939.373	90	1.0665	976.991	116.936	371.559	1.0687	39.01	47.9766	975.69	116.737	371.107	1.06738	38.6589	47.9978	-1.30084	-0.132028	-0.118933	-0.351169	-0.91268	0.0211942	0.0628876	212.516	976.635	117.008	371.309	1.06816	38.9697	56.4629	974.763	116.84	370.541	1.06602	38.5264	54.6594	-0.192725	-0.209011	-1.04589	128.535	372.913	39.2668	371.542	38.9908
		SD			0.184445	13.6114	45.9318	0	0.0503695	47.6319	15.7131	33.4948	0.0898809	8.79924	11.8073	47.2972	15.7106	33.2714	0.0901044	8.7417	13.0885	2.22892	0.225694	0.352018	0.126135	0.342474	6.59394	12.8134	1079.37	48.8146	15.7619	34.1337	0.0908311	8.8734	25.594	48.9829	15.7733	34.2017	0.0905703	8.55366	23.4355	0.090961	0.126807	0.53723	65.0769	34.9281	9.04906	31.7814	8.4912
		SEM			0.0824864	6.08718	20.5413	0	0.0225259	21.3016	7.02713	14.9793	0.040196	3.93514	5.2804	21.152	7.02599	14.8794	0.0402959	3.90941	5.85338	0.996803	0.100934	0.157427	0.0564093	0.153159	2.9489	5.73032	482.708	21.8305	7.04892	15.2651	0.0406209	3.96831	11.446	21.9058	7.05405	15.2955	0.0405042	3.82531	10.4807	0.040679	0.05671	0.240256	29.1033	15.6203	4.04686	14.2131	3.79738
	GG - P168 + Lona P100	2020-10-20	SM	GG318	4.78	107.613	893.533	90	1.12469	993.52	82.5479	414.212	1.15911	60.208	63.9016	994.244	82.3901	414.732	1.16024	59.8867	62.7038	0.724388	0.0729113	0.125544	-0.321268	-0.533597	-1.19779	-1.87444	351.283	997.766	82.1271	416.756	1.16505	60.8882	64.2594	997.299	82.0242	416.625	1.16459	60.4849	63.7589	-0.0468422	-0.0313764	-0.662294	125.521	417.91	61.198	416.219	60.7443
		2020-10-21	SM	GG316	6.45	112.34	933.409	90	1.03163	955.062	105.207	372.324	1.03506	42.4634	97.1747	956.636	104.764	373.554	1.03751	42.476	92.7805	1.57307	0.164708	0.330206	0.0126289	0.0297405	-4.39417	-4.52193	-15204.6	957.512	104.862	373.894	1.03846	42.7827	89.0176	956.19	104.781	373.314	1.03695	42.5363	84.0751	-0.138078	-0.15519	-0.575956	-1951.16	374.818	42.9711	371.889	42.3752
		2020-10-22	SM	GG314	5.92	112.34	1016.19	90	1.02348	1009.52	110.332	394.427	0.994838	42.8947	77.8772	1008.07	110.454	393.58	0.993098	41.4684	58.4815	-1.45167	-0.143799	-0.214907	-1.42627	-3.32505	-19.3957	-24.9055	749.027	1001.52	111.463	389.298	0.984741	41.9072	64.0636	1001.36	111.458	389.222	0.984567	41.3627	61.9983	-0.0162117	-0.0195531	-1.29931	38.1767	391.312	42.2935	384.252	40.9476
		2020-10-23	SM	GG340	4.17	127.903	823.461	90	1.08777	930.032	98.3362	366.68	1.19573	44.7416	40.5693	932.093	98.0026	368.044	1.19917	44.6643	39.0852	2.06033	0.221533	0.371916	-0.077288	-0.172743	-1.48412	-3.65823	2117.73	931.037	98.2017	367.317	1.19736	44.8807	41.3247	928.814	98.1569	366.25	1.19423	44.5536	41.0863	-0.238767	-0.290403	-0.728925	423.283	367.935	45.0161	365.9	44.5715
		mean			5.33	115.049	916.649	90	1.06689	972.033	99.1057	386.911	1.09618	47.5769	69.8807	972.76	98.9026	387.477	1.0975	47.1239	63.2627	0.726527	0.0788384	0.15319	-0.45305	-1.00041	-6.61796	-8.74004	-2996.64	971.96	99.1635	386.816	1.09641	47.6147	64.6663	970.916	99.1051	386.353	1.09509	47.2344	62.7297	-0.109975	-0.124131	-0.816621	-341.046	387.994	47.8697	384.565	47.1597
		SD			1.04093	8.8546	80.4319	0	0.047973	36.1426	12.0831	21.7861	0.0963949	8.47849	23.8315	34.7464	12.1279	21.2256	0.0979291	8.61251	22.2038	1.55351	0.160559	0.267977	0.663973	1.56718	8.64005	10.8332	8173.72	33.7806	12.582	21.9831	0.101211	8.93652	19.4794	34.7005	12.6157	22.3517	0.100424	8.93145	17.5657	0.100257	0.12669	0.327828	1086	22.2257	8.96061	22.4436	9.17825
		SEM			0.520465	4.4273	40.2159	0	0.0239865	18.0713	6.04154	10.893	0.0481975	4.23924	11.9157	17.3732	6.06393	10.6128	0.0489645	4.30626	11.1019	0.776757	0.0802796	0.133989	0.331987	0.783588	4.32003	5.41662	4086.86	16.8903	6.29098	10.9915	0.0506057	4.46826	9.73972	17.3503	6.30787	11.1759	0.0502118	4.46573	8.78283	0.0501285	0.0633451	0.163914	542.998	11.1128	4.48031	11.2218	4.58913
	GG P168 + Lona P21	2021-01-28	ABR	GG469	6.524	112.592	883.537	90	1.13795	992.655	83.9421	412.386	1.1787	58.9469	61.2667	992.539	83.7809	412.489	1.17876	58.415	60.5865	-0.116334	-0.0117195	0.0250047	-0.531919	-0.902369	-0.680217	-1.11026	123.038	995.409	83.6629	414.042	1.18263	59.3812	60.283	996.527	83.3975	414.866	1.18443	58.8449	59.6008	0.112296	0.199098	-0.903068	100.815	413.459	59.2283	411.582	58.7369
		2021-01-29	ABR	GG431	5.951	134.063	946.391	90	1.02117	1058.75	112.731	416.645	1.16458	44.3468	48.2282	1054.43	112.886	414.331	1.15907	43.6174	47.5872	-4.31688	-0.407733	-0.555284	-0.72942	-1.64481	-0.641049	-1.3292	80.8118	1056.83	112.991	415.423	1.16189	44.1146	48.6367	1053.74	112.777	414.094	1.15836	43.5567	48.1901	-0.29192	-0.319761	-1.26487	76.4979	416.779	44.3722	413.603	43.7703
		2021-01-29	ABR	GG459	3.607	129.362	1053.64	90	1.16302	1088.18	104.515	439.577	1.06425	50.4656	35.4437	1083.68	104.394	437.448	1.05951	49.7722	33.8006	-4.49891	-0.413434	-0.484294	-0.693364	-1.37393	-1.64312	-4.63585	337.414	1083.75	105.045	436.829	1.05888	49.8969	36.2099	1077.5	104.392	434.357	1.05282	49.0993	34.7608	-0.576776	-0.565906	-1.59865	115.044	436.912	49.9142	430.441	48.5883
		2021-01-30	ABR	GG449	5.619	116.152	838.92	90	1.09308	866.382	100.247	332.944	1.06	39.851	15.2231	863.344	99.8587	331.813	1.05634	39.4298	15.3038	-3.0381	-0.350665	-0.339706	-0.421149	-1.05681	0.0807295	0.53031	-50.1802	871.049	99.5498	335.974	1.06742	40.4952	25.9759	870.48	99.0143	336.226	1.06738	40.3791	25.3883	-0.0653033	0.0747599	-0.286785	27.5756	338.904	41.1234	334.147	40.106
		2021-02-01	ABR	GG446	3.706	135.073	945.714	60	1.12817	1045.13	103.019	419.547	1.16218	32.5769	41.914	1043.85	102.743	419.183	1.16094	32.4306	38.1556	-1.28204	-0.122667	-0.0869222	-0.14628	-0.449031	-3.75845	-8.96705	1996.98	1047.61	102.717	421.086	1.16561	32.7927	37.9523	1046.57	102.637	420.648	1.16443	32.5908	36.3819	-0.0988127	-0.104013	-0.615546	137.991	422.201	32.9494	421.544	32.857
		mean			5.0814	125.449	933.641	84	1.10868	1010.22	100.891	404.22	1.12594	45.2374	40.4151	1007.57	100.732	403.053	1.12293	44.733	39.0867	-2.65045	-0.261244	-0.28824	-0.504426	-1.08539	-1.32842	-3.10241	497.613	1010.93	100.793	404.671	1.12729	45.3361	41.8116	1008.96	100.444	404.038	1.12548	44.8941	40.8644	-0.184103	-0.143165	-0.933783	91.5848	405.651	45.5175	402.263	44.8117
		SD			1.34089	10.4147	80.919	13.4164	0.0549775	87.536	10.5536	41.1895	0.0586166	10.067	17.0105	87.0818	10.6451	41.032	0.0598428	9.91601	16.7998	1.91301	0.183087	0.250524	0.235732	0.457021	1.49017	3.77674	849.687	84.5012	10.7885	39.4531	0.0591451	10.0041	13.0845	82.8382	10.7834	38.7686	0.0606791	9.82158	13.2436	0.26223	0.30662	0.517804	42.172	38.3766	9.82209	38.7975	9.67362
		SEM			0.599662	4.65761	36.1881	6	0.0245867	39.1473	4.71971	18.4205	0.0262141	4.50212	7.60734	38.9442	4.76062	18.3501	0.0267625	4.43457	7.5131	0.855522	0.0818788	0.112038	0.105423	0.204386	0.666425	1.68901	379.992	37.7901	4.82475	17.644	0.0264505	4.47397	5.85157	37.0464	4.82249	17.3378	0.0271365	4.39234	5.92274	0.117273	0.137125	0.231569	18.8599	17.1626	4.39257	17.3508	4.32618
[truncated: 7 more columns]

## Sheet: Active testing - SMA2
SMA2	Agonist induced contraction
	Region	Date	Personnel	Mouse #	Geometric configurations					100 mM KCl																				1 uM PE																EC function (10 uM Ach)
					Unloaded Configuration (2mmHg)			Loaded Configuration		Basal						Contracted						Contractile Changes								Basal						Contracted						Contractile Changes				Dilated
					L (mm)	H (μm)	OD (μm)	P (mmHg)	λz	od (μm)	h (μm)	ir (μm)	λθ	σϑ (kPa)	σz (kPa)	od (μm)	h (μm)	ir (μm)	λθ	σϑ (kPa)	σz (kPa)	Dod (μm)	Dod (%)	Dir (%)	Δσϑ (kPa)	Δσϑ (%)	Δσz (kPa)	Δσz (%)	Δσz/Δσϑ (%)	od (μm)	h (μm)	ir (μm)	λθ	σϑ (kPa)	σz (kPa)	od (μm)	h (μm)	ir (μm)	λθ	σϑ (kPa)	σz (kPa)	Dod (%)	Dir (%)	Δσϑ (%)	Dσϑ (% KCl)	ir Ach (μm)	σϑ Ach(kPa)	ir L-NAME (μm)	σϑ Lname (kPa)
	WT - P42	2020-10-07	SM	WT498	4.21	42.9939	191.24	50	1.75036	236.225	16.5783	101.534	1.48164	0	0	135.323	15.6288	52.0325	0.8074	0	0	-100.902	-42.7145	-48.7537	0	0	-48.8756	-97.6904	111.833	234.803	16.6952	100.706	1.47126	0	0	165.996	16.0833	66.9146	1.01124	0	0	-29.3042	-33.5547	0	0	96.0015		63.7857
		2020-10-08	SM	WT503	3.48	45.947	193.056	50	1.46552	259.033	19.2334	110.283	1.63008	0	0	155.228	18.1114	59.5024	0.932072	0	0	-103.805	-40.0742	-46.0457	0	0	-25.4876	36.1505	-43.1092	244.321	20.6173	101.543	1.52066	0	0	165.271	20.3752	62.2603	0.984955	0	0	-32.3549	-38.6858	0	0	99.5074		47.0097
		2020-10-12	SM	WT519	2.92	49.3892	184.221	50	1.57808	205.305	23.1685	79.4842	1.35084	0	0	114.214	21.567	35.5399	0.687129	0	0	-91.0914	-44.3688	-55.2869	0	0	-21.1397	-37.3427	1737.66	222.743	20.9072	90.4644	1.49695	0	0	133.029	19.0233	47.4914	0.845543	0	0	-40.2768	-47.5027	0	0	86.7982		33.4791
		2021-06-14	SM	m1	2.54	43.5717	222.554	50	1.55945	279.915	19.1798	120.778	1.45676	0	0	118.22	17.5395	41.5707	0.562519	0	0	-161.694	-57.7655	-65.5808	0	0	-27.7436	-30.7855	-17539.5	259.416	20.9729	108.735	1.33222	0	0	203.395	18.8118	82.8856	1.03129	0	0	-21.5951	-23.7728	0	0	107.873		77.6799
		2021-06-15	SM	m2	4.16	41.9809	161.133	50	1.44447	200.081	19.1383	80.9024	1.51859	0	0	115.229	17.3903	40.2244	0.821128	0	0	-84.8519	-42.4087	-50.2803	0	0	-44.1608	47.622	-3371.51	198.002	19.3878	79.6133	1.49904	0	0	138.448	16.8217	52.4022	1.02076	0	0	-30.0776	-34.179	0	0	83.2683		45.2634
		mean			3.462	44.7765	190.441	50	1.55958	236.112	19.4596	98.5963	1.48758	0	0	127.643	18.0474	45.774	0.762049	0	0	-108.469	-45.4663	-53.1895	0	0	-33.4814	-16.4092	-3820.92	231.857	19.7161	96.2124	1.46403	0	0	161.228	18.223	62.3908	0.978759	0	0	-30.7217	-35.539	0	0	94.6898	#DIV/0!	53.4436	#DIV/0!
		SD			0.740081	2.96193	22.0021	0	0.12128	34.2466	2.36064	18.1354	0.101179	0	0	17.6289	2.17552	9.75758	0.141315	0	0	30.707	7.04401	7.69928	0	0	12.2492	59.4013	7890.46	23.1988	1.80583	11.3358	0.0757366	0	0	27.9787	1.74363	13.8048	0.0764266	0	0	6.70237	8.62064	0	0	9.89276	#DIV/0!	17.3295	#DIV/0!
		SEM			0.330974	1.32462	9.83964	0	0.0542383	15.3156	1.05571	8.11039	0.0452488	0	0	7.88387	0.97292	4.36372	0.0631981	0	0	13.7326	3.15018	3.44322	0	0	5.47801	26.565	3528.72	10.3748	0.807592	5.06951	0.0338704	0	0	12.5124	0.779774	6.17367	0.034179	0	0	2.99739	3.85527	0	0	4.42418	#DIV/0!	7.74999	#DIV/0!
	GG - P42	2020-03-09	SM	GG163	2.1	39.0722	189.6	50	1.42857	188.099	25.287	68.7623	1.0816	0	0	120.267	24.0228	36.1105	0.639376	0	0	-67.8319	-36.0619	-47.4849	0	0	-15.6341	120.771	-10618	200.189	23.2708	76.8235	1.17532	0	0	155.636	22.8975	54.9203	0.881818	0	0	-22.2555	-28.5111	0	0	66.0677		-4.11109
		2020-03-10	SM	GG167	2.76	48.1716	220.086	50	1.5	253.791	24.0289	102.866	1.33649	0	0	127.714	23.7012	40.1556	0.605025	0	0	-126.077	-49.6775	-60.9633	0	0	-25.6023	-30.567	-7632.38	240.069	25.7617	94.2731	1.2466	0	0	156.011	23.2002	54.8052	0.772538	0	0	-35.0144	-41.8655	0	0	93.423		-9.37108
		2020-03-11	SM	GG166	3.05	40.9808	164.098	50	1.44131	184.175	21.5218	70.5656	1.32112	0	0	95.9185	19.7808	28.1784	0.618416	0	0	-88.2563	-47.9199	-60.0677	0	0	-33.5199	-46.4301	5291.63	186.089	21.2345	71.8099	1.339	0	0	114.884	19.176	38.2659	0.777372	0	0	-38.2638	-46.7121	0	0	70.1738		-0.89748
		2021-04-29	SM	GG868	2.62	51.4776	209.633	50	1.44275	235.342	27.0981	90.5731	1.31671	0	0	135.043	25.3691	42.1524	0.693457	0	0	-100.299	-42.6185	-53.4603	0	0	-13.686	-21.5078	-43780.5	231.411	27.7012	88.0045	1.28804	0	0	197.806	26.8187	72.0843	1.08113	0	0	-14.522	-18.0902	0	0	110.594		73.7557
		2021-04-29	SM	GG879	2.18	50.8732	207.209	50	1.45963	226.018	27.4392	85.5697	1.27021	0	0	161.094	25.225	55.322	0.869084	0	0	-64.9238	-28.7251	-35.3486	0	0	-8.94846	-90.2878	103.63	218.892	28.6401	80.8059	1.21694	0	0	192.99	28.5213	67.9739	1.05202	0	0	-11.8331	-15.8801	0	0	113.636		70.4567
		mean			2.542	46.1151	198.125	50	1.45445	217.485	25.075	83.6674	1.26523	0	0	128.007	23.6198	40.3838	0.685072	0	0	-89.4776	-41.0006	-51.465	0	0	-19.4782	-13.6044	-11327.1	215.33	25.3216	82.3434	1.25318	0	0	163.465	24.1227	57.6099	0.912977	0	0	-24.3778	-30.2118	0	0	90.7788	#DIV/0!	25.9665	#DIV/0!
		SD			0.3994	5.7356	21.9531	0	0.027753	30.3435	2.42109	14.263	0.105587	0	0	23.6322	2.26625	9.91918	0.108247	0	0	25.1473	8.67269	10.5331	0	0	9.92315	79.6315	19197.8	22.1792	3.07325	8.91843	0.0632446	0	0	33.6453	3.65505	13.2873	0.147219	0	0	11.8845	13.8139	0	0	22.1205	#DIV/0!	42.2441	#DIV/0!
		SEM			0.178617	2.56504	9.81772	0	0.0124115	13.57	1.08274	6.37859	0.04722	0	0	10.5686	1.0135	4.43599	0.0484095	0	0	11.2462	3.87855	4.71054	0	0	4.43777	35.6123	8585.51	9.91883	1.3744	3.98844	0.0282838	0	0	15.0466	1.63459	5.94226	0.0658383	0	0	5.31493	6.17776	0	0	9.89258	#DIV/0!	18.8921	#DIV/0!
	Wt - P100	2018-10-16	SM	P157 M	3.2	48.714	212.346	60	1.67	264.828	19.4524	112.962	1.49956	0	0	111.715	55.8575	0	0.422216	0	0	-153.113	-57.8161	-100	0	0	-13.1399	-5.65281	5.30295	266.787	19.2854	114.108	1.51255	0	0	193.771	28.9617	67.9239	1.0072	0	0	-27.3685	-40.474	0	0
		2018-10-24	SM	P162 M	3.74	42.887	218.826	60	1.65	247.588	20.1025	103.691	1.29298	0	0	126.391	20.0551	43.1406	0.604393	0	0	-121.197	-48.9509	-58.3952	0	0	-29.8786	-59.8942	-11529.6	264.58	18.5903	113.7	1.39815	0	0	197.033	17.5541	80.9626	1.02012	0	0	-25.5298	-28.7926	0	0
		2019-01-28	SM	P210 F	3.4	38.432	194.008	60	1.64618	199.503	20.2641	79.4872	1.1521	0	0	119.903	20.8242	39.1271	0.636849	0	0	-79.5999	-39.8992	-50.7755	0	0	-42.0479	-450.228	7525.18	181.344	22.9276	67.7446	1.01826	0	0	152.24	22.7853	53.3349	0.832102	0	0	-16.049	-21.2706	0	0
		2018-02-09	SM	Jejunal	3.05	38.2732	155.54	60	1.59869	226.011	13.1915	99.8138	1.81483	0	0	139.708	24.333	45.5208	0.983865	0	0	-86.303	-38.1854	-54.3943	0	0	-17.9111	-9.26399	12.3067	193.706	15.7783	81.0749	1.51729	0	0	105.968	15.0885	37.8957	0.774984	0	0	-45.2943	-53.2584	0	0	81.5272		76.1228
		2018-04-13	SM	Jejunal	2.58	34.187	143.618	60	1.6969	220.452	10.5009	99.7249	1.91857	0	0	86.1596	9.23723	33.8426	0.70293	0	0	-134.292	-60.9168	-66.0641	0	0	-30.4751	-19.1603	9777.23	209.405	11.1187	93.5839	1.81198	0	0	141.063	10.065	60.4665	1.19708	0	0	-32.6363	-35.3879	0	0	106.102		60.3488
		mean			3.194	40.4986	184.868	60	1.65235	231.676	16.7023	99.1358	1.53561	0	0	116.775	26.0614	32.3262	0.67005	0	0	-114.901	-49.1537	-65.9258	0	0	-26.6905	-108.84	1158.09	223.165	17.5401	94.0422	1.45165	0	0	158.015	18.8909	60.1167	0.966297	0	0	-29.3756	-35.8367	0	0	93.8147	#DIV/0!	68.2358	#DIV/0!
		SD			0.429628	5.52849	33.7395	0	0.0361225	25.2264	4.54405	12.2351	0.328585	0	0	19.9441	17.588	18.605	0.203958	0	0	31.384	10.2396	19.8764	0	0	11.4131	192.059	8343.39	40.0754	4.40206	20.3038	0.286593	0	0	38.1789	7.25826	16.0887	0.167661	0	0	10.7291	12.1142	0	0	17.3772	#DIV/0!	11.1539	#DIV/0!
		SEM			0.192135	2.47242	15.0888	0	0.0161545	11.2816	2.03216	5.47168	0.146948	0	0	8.91928	7.8656	8.32041	0.0912128	0	0	14.0354	4.57929	8.889	0	0	5.10408	85.8915	3731.28	17.9223	1.96866	9.08013	0.128168	0	0	17.0741	3.24599	7.1951	0.0749803	0	0	4.79821	5.41762	0	0	12.2875	#DIV/0!	7.88703	#DIV/0!
	GG - P100	2020-02-26	SM	GG75	3.5	43.4587	172.541	60	1.55571	199.973	20.0402	79.9463	1.39394	0	0	92.1198	19.5878	26.4721	0.561905	0	0	-107.853	-53.9339	-66.8876	0	0	-21.4119	-48.5158	-3796.04	185.474	22.0669	70.6702	1.26592	0	0	144.929	19.578	52.8867	0.971096	0	0	-21.8601	-25.1641	0	0	67.4802		-2.44283
		2020-02-28	SM	GG86	3.96	42.3367	193.493	60	1.62652	201.266	21.9403	78.6928	1.18636	0	0	102.701	20.4342	30.9162	0.544249	0	0	-98.5653	-48.9726	-60.7128	0	0	-22.0882	-22.4026	5666.19	178.126	25.8351	63.2279	1.00751	0	0	121.737	22.7399	38.1285	0.654931	0	0	-31.6569	-39.6967	0	0	64.1599		-6.19483
		2020-03-02	SM	GG84	2.74	55.0455	227.96	60	1.57774	270.122	24.5681	110.493	1.42009	0	0	148.555	22.6454	51.6321	0.728161	0	0	-121.567	-45.0045	-53.2712	0	0	-24.595	-37.9976	-27199.9	240.254	28.488	91.639	1.22469	0	0	180.868	26.1305	64.3034	0.894877	0	0	-24.7182	-29.8297	0	0	71.2181		-1.22836
		2018-11-14	SM	GG176	3.96	27.882	199.798	60	1.64949	171.47	19.0677	66.6674	0.886494	0	0	100.265	18.4673	31.6654	0.475803	0	0	-71.2047	-41.526	-52.5024	0	0	-11.2534	-16.0417	6977.64	186.503	17.1602	76.0912	0.985031	0	0	158.46	16.1976	63.0324	0.827511	0	0	-15.0362	-17.162	0	0	54.1023		32.3715
		2018-11-15	SM	GG178	5.09	32.209	200.995	60	1.64165	210.987	17.0779	88.4156	1.14885	0	0	106.49	16.7552	36.4899	0.531649	0	0	-104.497	-49.5276	-58.7291	0	0	-57.8389	76.3202	-19886.1	208.716	17.3004	87.0578	1.13407	0	0	175.208	16.4761	71.1278	0.940432	0	0	-16.0545	-18.2981	0	0
		mean			3.85	40.1864	198.957	60	1.61022	210.764	20.5388	84.8431	1.20715	0	0	110.026	19.578	35.4352	0.568354	0	0	-100.738	-47.7929	-58.4206	0	0	-27.4375	-9.72752	-7647.63	199.815	22.1701	77.7372	1.12344	0	0	156.24	20.2244	57.8958	0.857769	0	0	-21.8652	-26.0301	0	0	64.2401	#DIV/0!	5.62636	#DIV/0!
		SD			0.853874	10.6203	19.8349	0	0.0412975	36.3116	2.85437	16.3007	0.216151	0	0	22.1729	2.19911	9.72652	0.0949656	0	0	18.5442	4.72127	5.88603	0	0	17.7424	49.7706	15313.9	25.3369	5.05402	11.6544	0.125758	0	0	23.925	4.23946	12.8293	0.125611	0	0	6.79001	9.2248	0	0	7.34782	#DIV/0!	17.955	#DIV/0!
		SEM			0.381864	4.74953	8.87044	0	0.0184688	16.239	1.27651	7.28988	0.0966658	0	0	9.91602	0.983472	4.34983	0.0424699	0	0	8.29323	2.11141	2.63231	0	0	7.93465	22.2581	6848.58	11.331	2.26023	5.21202	0.0562409	0	0	10.6996	1.89594	5.73744	0.0561748	0	0	3.03659	4.12545	0	0	3.67391	#DIV/0!	8.97748	#DIV/0!
	Wt - P140	2018-02-26	SM	3	4.66	44.546	191.904	60	1.63541	274.994	15.4658	122.031	1.76121	0	0	143.96	13.8251	58.1548	0.88312	0	0	-131.034	-47.6499	-52.3444	0	0	-62.4281	99.8362	-112.747	267.383	15.9646	117.727	1.70617	0	0	181.539	14.2623	76.5073	1.13517	0	0	-32.1052	-35.0129	0	0	123.176		73.4657
		2018-03-05	SM	4	4.53	39.717	174	60	1.59845	251.643	14.0427	111.779	1.7694	0	0	114.585	13.3366	43.9561	0.753996	0	0	-137.057	-54.465	-60.6758	0	0	-57.8215	161.096	67694.8	245.388	14.4476	108.247	1.71981	0	0	167.417	13.1327	70.5756	1.14895	0	0	-31.7748	-34.801	0	0	102.782		64.7164
		2018-05-24	SM	6	3.66	41.464	169.543	60	1.78033	224.927	14.1524	98.3114	1.64566	0	0	99.7533	13.5965	36.2802	0.672685	0	0	-125.174	-55.6509	-63.0967	0	0	-24.5378	-9.52445	-2307.31	203.944	15.8598	86.1121	1.4685	0	0	171.297	14.5004	71.1481	1.22422	0	0	-16.0077	-17.3774	0	0	81.6983		68.4787
		2018-10-08	SM	WTM1	4.4	43.359	164.423	60	1.64386	287.742	11.5621	132.309	2.28127	0	0	155.025	10.5637	66.9487	1.19326	0	0	-132.717	-46.1236	-49.3997	0	0	-62.4148	187.933	-208.962	263.981	12.7082	119.282	2.07553	0	0	150.767	12.4979	62.8856	1.14212	0	0	-42.8871	-47.28	0	0
		2019-10-09	SM	WTM2	5.44	46.84	175.435	60	1.64706	249.176	15.6609	108.927	1.81589	0	0	107.845	14.3715	39.5508	0.72688	0	0	-141.331	-56.7194	-63.6905	0	0	-98.5826	12502.4	-1.62817e+06	239.9	16.3598	103.59	1.73832	0	0	210.046	19.1582	85.8648	1.48441	0	0	-12.4442	-17.111	0	0
		mean			4.538	43.1852	175.061	60	1.66102	257.696	14.1768	114.671	1.85469	0	0	124.234	13.1387	48.9781	0.845989	0	0	-133.463	-52.1218	-57.8414	0	0	-61.157	2588.34	-312622	244.119	15.068	106.992	1.74167	0	0	176.213	14.7103	73.3963	1.22697	0	0	-27.0438	-30.3164	0	0	102.552	#DIV/0!	68.8869	#DIV/0!
		SD			0.636097	2.74911	10.3509	0	0.0694515	24.4182	1.63702	12.9833	0.246567	0	0	23.9698	1.48914	13.0622	0.208963	0	0	6.1234	4.87494	6.54491	0	0	26.2486	5542.63	736016	25.3435	1.50442	13.3735	0.216701	0	0	21.9208	2.6178	8.49454	0.148322	0	0	12.5892	12.9589	0	0	20.7397	#DIV/0!	4.38895	#DIV/0!
		SEM			0.284471	1.22944	4.62908	0	0.0310596	10.9202	0.732096	5.80631	0.110268	0	0	10.7196	0.665965	5.8416	0.0934509	0	0	2.73847	2.18014	2.92697	0	0	11.7387	2478.74	329156	11.334	0.672798	5.98082	0.0969116	0	0	9.80326	1.17072	3.79887	0.0663317	0	0	5.63007	5.79541	0	0	11.9741	#DIV/0!	2.53396	#DIV/0!
	GG - P140	2019-11-02	SM	GG6253	11.5	34.3009	222.899	60	1.01826	225.525	32.9984	79.7643	1.02083	0	0	221.795	32.8157	78.082	1.00202	0	0	-3.73004	-1.65393	-2.1091	0	0	-13.0008	84.4514	-817.287	244.157	29.6118	92.467	1.13758	0	0	230.505	29.8773	85.3752	1.06378	0	0	-5.59161	-7.66948	0	0	87.7775		81.3575
		2019-11-08	SM	GG6235	3.92	40.8732	223.361	60	1.54005	249.132	21.2537	103.312	1.24873	0	0	183.284	21.132	70.5101	0.888565	0	0	-65.8476	-26.4308	-31.7505	0	0	-34.1829	-48.7535	53.0474	258.125	20.3708	108.692	1.30285	0	0	238.909	20.4474	99.0071	1.19713	0	0	-7.44454	-8.91027	0	0	109.297		97.6908
		2019-11-27	SM	GG6228	6.37	40.2289	147.212	60	1.0562	195.85	23.6653	74.2596	1.60946	0	0	95.4953	23.1513	24.5963	0.676219	0	0	-100.355	-51.2406	-66.878	0	0	-36.255	-18.4791	-1106.38	176.503	27.3129	60.9384	1.39452	0	0	104.96	26.9339	25.5463	0.729336	0	0	-40.5332	-58.0784	0	0	32.1126		26.5531
		2019-12-02	SM	GG6233	5.07	35.084	182.384	60	1.26529	209.125	21.8041	82.7583	1.27169	0	0	106.767	19.8436	33.54	0.590113	0	0	-102.357	-48.9456	-59.4723	0	0	-48.7629	25170.7	2.30232e+06	198.115	23.3737	75.6837	1.18629	0	0	143.345	21.0148	50.6577	0.830483	0	0	-27.6455	-33.0666	0	0	78.6369		-0.769141
		2019-12-04	SM	GG6238	5.08	49.7009	209.975	60	1.47421	239.657	25.1952	94.6334	1.3381	0	0	172.96	24.1248	62.3552	0.928629	0	0	-66.6972	-27.8303	-34.1087	0	0	-38.3614	-441.495	627.462	241.155	24.9975	95.58	1.34867	0	0	152.266	23.2256	52.9073	0.805122	0	0	-36.8598	-44.646	0	0	41.9357		28.533
		mean			6.388	40.0376	197.166	60	1.2708	223.858	24.9833	86.9456	1.29776	0	0	156.06	24.2135	53.8167	0.81711	0	0	-67.7974	-31.2202	-38.8637	0	0	-34.1126	4949.29	460215	223.611	25.1334	86.6722	1.27398	0	0	173.997	24.2998	62.6987	0.925171	0	0	-23.6149	-30.4742	0	0	69.9519	#DIV/0!	46.673	#DIV/0!
		SD			2.9863	6.15552	32.5052	0	0.236502	21.7525	4.74449	11.8005	0.211278	0	0	53.4924	5.09226	23.4806	0.175437	0	0	39.8874	20.147	25.6594	0	0	13.067	11305.9	1.02977e+06	34.6065	3.55679	18.5793	0.108668	0	0	58.2764	4.02594	29.384	0.196789	0	0	16.3112	22.1055	0	0	32.2409	#DIV/0!	41.2021	#DIV/0!
		SEM			1.33551	2.75283	14.5368	0	0.105767	9.72803	2.1218	5.27736	0.0944866	0	0	23.9225	2.27733	10.5008	0.0784579	0	0	17.8382	9.01	11.4752	0	0	5.84373	5056.15	460526	15.4765	1.59065	8.30894	0.0485979	0	0	26.062	1.80046	13.1409	0.0880069	0	0	7.29459	9.88588	0	0	14.4186	#DIV/0!	18.4262	#DIV/0!
	Wt - P168	2020-07-17	SM	WT160	3.71	54.8349	253.98	60	1.10054	325.521	34.0419	128.718	1.46365	34.2465		162.014	35.4203	45.5868	0.635687	14.295		-163.506	-50.2292	-64.5841	-19.9515	-8.64049	-17.4313	-22.1775	256.67	322.502	34.4464	126.805	1.44646	33.4469		217.876	32.0224	76.9154	0.933255	23.2135		-32.4422	-39.3434	-10.2334	391.571	117.814	29.8431	63.0251	13.0938
		2020-08-24	SM	WT249	2.22	49.3612	219.525	60	1.45676	279.294	22.4489	117.198	1.5094	45.7614		171.273	20.8588	64.7777	0.883937	28.8419		-108.021	-38.6764	-44.7279	-16.9195	-83.5378	-130.588	116.686	-139.68	279.023	22.4749	117.037	1.50765	45.6556		188.178	20.7225	73.3667	0.984086	32.3208		-32.5581	-37.313	-13.3349	38.2239	119.239	47.1105	65.271	18.9775
		2020-08-25	SM	WT257	2.3	51.9837	226.122	60	1.64913	290.375	20.3266	124.861	1.55077	53.1375		180.017	19.6604	70.3483	0.92086	32.6227		-110.358	-38.0053	-43.6588	-20.5148	-90.568	-30.4631	-29.3633	32.4213	290.491	20.3171	124.929	1.55149	53.1868		192.817	20.1818	76.2265	0.991366	34.2131		-33.624	-38.9839	-18.9738	42.6353	122.099	51.1377	114.156	45.6303
		2020-09-03	SM	WT269	2.72	48.7492	206.074	60	1.675	264.72	18.6041	113.756	1.56438	52.9119		117.242	17.283	41.3378	0.635365	23.1325		-147.478	-55.7111	-63.661	-29.7793	-1.47813	-36.6911	-62.2921	4214.25	265.468	18.5432	114.191	1.56952	53.2602		167.324	17.0896	66.5725	0.954933	35.1609		-36.97	-41.7006	-18.0993	2503.44	116.309	54.9759	62.8026	21.0195
		2020-09-04	SM	WT268	2.32	44.8896	217.294	60	1.66078	284.567	17.4451	124.838	1.54939	61.2433		129.769	17.474	47.4102	0.651344	25.7033		-154.798	-54.3979	-62.0227	-35.5401	-0.35401	-43.184	-36.4538	10297.4	282.446	17.5947	123.628	1.53622	60.2065		181.026	16.8994	73.6136	0.951986	38.8446		-35.9077	-40.4556	-21.3619	10541.5	125.826	62.0969	67.9197	22.6867
		mean			2.654	49.9637	224.599	60	1.50844	288.895	22.5733	121.874	1.52752	49.4601	#DIV/0!	152.063	22.1393	53.8922	0.745438	24.9191	#DIV/0!	-136.832	-47.404	-55.7309	-24.541	-36.9157	-51.6715	-6.72021	2932.21	287.986	22.6753	121.318	1.52227	49.1512	#DIV/0!	189.444	21.3831	73.339	0.963125	32.7506	#DIV/0!	-34.3004	-39.5593	-16.4007	2703.48	120.258	49.0328	74.6348	24.2816
		SD			0.621434	3.72134	17.9433	0	0.244845	22.5775	6.68291	6.17099	0.0411875	10.117	#DIV/0!	27.1986	7.57491	12.8248	0.144023	6.91758	#DIV/0!	25.8777	8.52071	10.5789	7.80674	45.9463	45.1289	70.6275	4497.04	21.3059	6.83826	5.42232	0.0480668	10.1764	#DIV/0!	18.5841	6.19699	4.09237	0.0240849	5.83581	#DIV/0!	2.04062	1.64409	4.51535	4500.1	3.77477	12.0661	22.1894	12.4725
		SEM			0.277914	1.66423	8.02448	0	0.109498	10.097	2.98869	2.75975	0.0184196	4.52448	#DIV/0!	12.1636	3.3876	5.73544	0.0644089	3.09363	#DIV/0!	11.5729	3.81058	4.73103	3.49128	20.5478	20.1823	31.5856	2011.14	9.52827	3.05816	2.42493	0.0214961	4.55101	#DIV/0!	8.31106	2.77138	1.83016	0.0107711	2.60985	#DIV/0!	0.912594	0.73526	2.01933	2012.51	1.68813	5.39612	9.92339	5.57787
	GG - P168	2019-12-31	SM	GG6245	3.7	68.13	241.805	60	1.32541	261.85	40.2944	90.6303	1.27569	21.9917		257.472	40.398	88.3378	1.24988	21.4917		-4.37794	-1.67193	-2.5295	-0.500049	-10.7354	-12.6686	-40.6176	378.353	269.978	38.5805	96.4085	1.33236	23.9891		266.666	38.5593	94.7737	1.31341	23.6609		-1.2268	-1.69575	-0.328164	16.9902	95.0972	23.5259	58.9016	12.9847
		2020-01-21	SM	GG6269	4.58	57.8635	222.761	60	1.36201	230.727	35.9706	79.3929	1.18107	21.6554		209.673	35.7167	69.1198	1.05494	19.4801		-21.054	-9.12509	-12.9396	-2.17531	-31.4245	-10.9316	-24.3077	77.3526	229.81	36.1797	78.7255	1.17425	21.4058		230.198	35.9286	79.1705	1.17812	21.6266		0.168731	0.565266	0.220742	-3.97864	80.2672	21.9853	66.5755	17.1909
		2020-02-17	SM	GG6294	4.48	63.3352	246.767	60	1.32812	255.474	40.7353	87.0016	1.17067	21.0844		194.488	70.6183	26.6255	0.675288	7.01567		-60.9862	-23.8718	-69.3966	-14.0688	-82.3468	-25.1295	-446.083	541.712	252.217	41.5158	84.5928	1.14866	20.2991		190.175	40.949	54.1384	0.813522	14.5755		-24.5988	-36.0012	-5.7236	40.6837	63.1025	14.1517	-2.43206	3.66929
		2020-08-21	SM	GG251
		2020-08-22	SM	GG259	2.18	42.1982	221.291	60	1.02844	231.487	37.9736	77.77	1.08052	20.3823		220.6	37.8703	72.4299	1.02031	19.299		-10.8868	-4.70296	-6.86658	-1.08334	-17.8372	-20.5455	-63.5906	356.506	232.28	37.7813	78.3585	1.08602	20.5903		222.23	38.0412	73.0737	1.02845	19.3656		-4.32659	-6.74438	-1.22464	41.9086	79.1624	20.8766	70.6203	17.9669
		mean			3.735	57.8817	233.156	60	1.26099	244.884	38.7435	83.6987	1.17699	21.2785	#DIV/0!	220.558	46.1508	64.1282	1.0001	16.8216	#DIV/0!	-24.3262	-9.84295	-22.9331	-4.45687	-35.586	-17.3188	-143.65	338.481	246.071	38.5143	84.5213	1.18532	21.5711	#DIV/0!	227.317	38.3695	75.2891	1.08338	19.8072	#DIV/0!	-7.49586	-10.969	-1.76392	23.901	79.4073	20.1349	48.4163	12.953
		SD			1.1088	11.2656	13.0243	0	0.155928	16.1232	2.21018	6.12768	0.0797997	0.705129	#DIV/0!	26.8376	16.4235	26.3717	0.238963	6.61239	#DIV/0!	25.3851	9.84055	31.2685	6.44544	32.334	6.67932	202.265	192.705	18.832	2.23615	8.42383	0.104797	1.67869	#DIV/0!	31.4222	2.06203	16.8025	0.214267	3.90414	#DIV/0!	11.5557	16.9656	2.70618	21.8401	13.0744	4.1341	34.2455	6.56475
		SEM			0.554399	5.6328	6.51216	0	0.077964	8.06159	1.10509	3.06384	0.0398999	0.352565	#DIV/0!	13.4188	8.21174	13.1858	0.119482	3.3062	#DIV/0!	12.6926	4.92028	15.6343	3.22272	16.167	3.33966	101.132	96.3525	9.41601	1.11808	4.21191	0.0523986	0.839344	#DIV/0!	15.7111	1.03101	8.40126	0.107133	1.95207	#DIV/0!	5.77784	8.48278	1.35309	10.92	6.53719	2.06705	17.1228	3.28237
	GG - P168 + Lona P100	2020-10-20	SM	GG318	3.9	50.101	221.581	60	1.59179	251.6	23.6805	102.119	1.32913	0	0	146.696	22.9639	50.3842	0.721556	0	0	-104.904	-41.6946	-50.6615	0	0	-32.0549	-40.4191	8642.75	244.077	24.5904	97.448	1.27995	0	0	151.886	24.3228	51.6202	0.743895	0	0	-37.7712	-47.028	0	0	69.9082		43.7542
		2020-10-21	SM	GG316	1.82	48.698	224.22	60	2.07418	226.681	19.9321	93.4084	1.17791	0	0	207.893	19.545	84.4014	1.07307	0	0	-18.7882	-8.28838	-9.6426	0	0	-43.0243	-86.4694	380.816	232.622	19.3198	96.9911	1.21524	0	0	175.944	18.83	69.1422	0.895127	0	0	-24.3646	-28.7128	0	0	69.2844		61.0728
		2020-10-22	SM	GG314	2.6	51.6495	243.282	60	1.43769	271.172	28.3521	107.234	1.26711	0	0	228.932	27.989	86.4772	1.04859	0	0	-42.2397	-15.5767	-19.3565	0	0	-64.4227	-115.025	269.757	260.549	29.8404	100.434	1.20391	0	0	166.911	28.4498	55.0055	0.722533	0	0	-35.9389	-45.2323	0	0	80.2668		59.3435
		2020-10-23	SM	GG340	3.42	48.908	212.191	60	1.45994	230.294	26.8925	88.2544	1.2457	0	0	200.681	26.5726	73.7679	1.0663	0	0	-29.6128	-12.8587	-16.4145	0	0	-22.5338	-37.3303	102.272	205.12	31.5067	71.0531	1.06326	0	0	166.135	32.0955	50.9718	0.820901	0	0	-19.0059	-28.2623	0	0	43.7853		45.5494
		mean			2.935	49.8391	225.319	60	1.6409	244.937	24.7143	97.754	1.25496	0	0	196.051	24.2676	73.7577	0.977378	0	0	-48.8861	-19.6046	-24.0188	0	0	-40.5089	-69.811	2348.9	235.592	26.3143	91.4816	1.19059	0	0	165.219	25.9245	56.6849	0.795614	0	0	-29.2702	-37.3088	0	0	65.8112	#DIV/0!	52.43	#DIV/0!
		SD			0.916861	1.3559	13.0409	0	0.296748	20.6589	3.73792	8.52548	0.0623743	0	0	35.0178	3.79315	16.5468	0.170861	0	0	38.5551	15.0306	18.2215	0	0	18.0072	37.5974	4197.46	23.3256	5.51635	13.7043	0.0912563	0	0	9.9416	5.69668	8.49109	0.0786508	0	0	9.05835	10.2139	0	0	15.5236	#DIV/0!	9.03892	#DIV/0!
		SEM			0.45843	0.67795	6.52044	0	0.148374	10.3294	1.86896	4.26274	0.0311872	0	0	17.5089	1.89658	8.27341	0.0854303	0	0	19.2775	7.5153	9.11075	0	0	9.00358	18.7987	2098.73	11.6628	2.75818	6.85217	0.0456281	0	0	4.9708	2.84834	4.24554	0.0393254	0	0	4.52917	5.10697	0	0	7.76182	#DIV/0!	4.51946	#DIV/0!
	GG P168 + Lona P21	2021-01-28	SM	GG469	4.5	46.3736	154.396	60	1.40489	183.676	22.0631	69.775	1.49611	29.2977		139.841	21.4723	48.4483	1.09578	22.0487		-43.8351	-23.8654	-30.565	-7.24899	-70.2334	-24.5511	867.007	-1234.47	156.228	27.7541	50.3601	1.18933	18.5145		111.988	24.4362	31.5577	0.810496	14.3302		-28.3178	-37.3358	-4.18428	23.5503	42.3547	14.9805	-0.138956	3.98075
		2021-01-29	SM	GG431	6.01	54.0013	162.176	60	1.31847	209.998	23.7942	81.2048	1.72133	31.2997		138.763	23.1646	46.2169	1.06863	19.9595		-71.235	-33.9218	-43.086	-11.3402	-91.6488	-19.9454	-17.4918	19.0857	197.165	25.8643	72.7183	1.58356	26.49		137.831	25.4206	43.4951	1.03916	17.6867		-30.0934	-40.1868	-8.80336	35.1856	63.9359	22.0342	-3.17651	3.07594
		2021-01-29	SM	GG459	4.65	58.657	208.206	60	1.29484	246.973	31.4308	92.0558	1.44128	27.4284		188.303	30.9469	63.2044	1.0522	20.3371		-58.6703	-23.7558	-31.3411	-7.09132	-67.7758	-17.9044	-27.8345	41.0684	237.07	33.2363	85.2985	1.36299	24.5293		190.67	32.777	62.5578	1.05579	19.2671		-19.5724	-26.6601	-5.26223	33.1401	89.7899	26.4334	54.2088	13.7778
		2021-01-30	SM	GG449	4.68	45.1262	134.89	60	1.51795	191.326	15.1467	80.5161	1.96269	46.522		97.6639	14.4214	34.4105	0.927349	23.0866		-93.6619	-48.9541	-57.2626	-23.4354	-0.721686	-64.2745	-34.2807	4750.09	173.25	17.0882	69.537	1.7397	36.5513		108.189	16.5075	37.5872	1.02137	22.214		-37.5532	-45.9464	-14.3373	4672.06	62.1903	30.6652	19.8304	8.46774
		2021-02-01	SM	GG446	4.85	50.7179	176.02	60	1.40495	227.128	22.0575	91.5065	1.63661	37.1852		129.807	21.0517	43.852	0.867948	20.6628		-97.3207	-42.8484	-52.0777	-16.5225	-0.274186	-34.3767	-36.415	13281.1	191.976	27.5019	68.4858	1.31262	23.9197		118.366	27.0559	32.1269	0.728716	13.4983		-38.3434	-53.0898	-10.4215	11453.6	70.0627	24.714	28.3321	9.07579
		mean			4.938	50.9752	167.138	60	1.38822	211.82	22.8985	83.0116	1.6516	34.3466	#DIV/0!	138.876	22.2114	47.2264	1.00238	21.2189	#DIV/0!	-72.9446	-34.6691	-42.8665	-13.1277	-46.1308	-32.2104	150.197	3371.38	191.138	26.289	69.28	1.43764	26.001	#DIV/0!	133.409	25.2394	41.465	0.931106	17.3992	#DIV/0!	-30.776	-40.6438	-8.60173	3243.5	65.6667	23.7655	19.8112	7.67561
		SD			0.612021	5.55923	27.3513	0	0.087995	25.9109	5.81158	9.20137	0.206324	7.72878	#DIV/0!	32.4986	5.91171	10.4097	0.0991164	1.30861	#DIV/0!	22.7895	11.2621	12.0032	6.92759	42.6795	19.0168	400.777	5992.63	30.3537	5.84631	12.5207	0.221018	6.5972	#DIV/0!	33.9835	5.85318	12.7419	0.15073	3.58432	#DIV/0!	7.66854	9.87059	4.09008	5010.33	17.0278	5.8266	23.3572	4.31955
		SEM			0.273704	2.48616	12.2319	0	0.0393526	11.5877	2.59902	4.11498	0.0922707	3.45641	#DIV/0!	14.5338	2.6438	4.65534	0.0443262	0.585228	#DIV/0!	10.1918	5.03657	5.36798	3.09811	19.0868	8.50456	179.233	2679.98	13.5746	2.61455	5.59944	0.098842	2.95036	#DIV/0!	15.1979	2.61762	5.69833	0.0674086	1.60296	#DIV/0!	3.42948	4.41426	1.82914	2240.69	7.61506	2.60573	10.4457	1.93176
[truncated: 7 more columns]

## Sheet: DTA Table Lona
		DTA	WT			GG			GG + L			GG + L
			n	=	5	n	=	5	n	=	5	n	=	5
	100 mM KCl	Loaded configuration
		Relaxed inner radius (μm)	517.22	±	14.6385	371.559	±	14.9793	404.22	±	18.4205	40.4151	±	7.60734
		Contracted inner radius (μm)	407.137	±	8.65499	371.107	±	14.8794	403.053	±	18.3501	39.0867	±	7.5131
		Change in inner radius (%)	-21.2727	±	1.18677	-0.118933	±	0.157427	-0.28824	±	0.112038	-1.32842	±	0.666425
		Stress calculations
		Relaxed circumferential stress (kPa)	141.671	±	9.51034	39.01	±	9.51034	45.2374	±	4.50212	100.732	±	4.76062
		Contracted circumferential stress (kPa)	89.6352	±	5.22816	38.6589	±	3.90941	44.733	±	4.43457	-0.261244	±	0.0818788
		Change in circumferential stress (%)	-36.5008	±	1.82913	-0.91268	±	0.153159	-1.08539	±	0.204386	497.613	±	379.992
	1 μM PE	Loaded configuration
		Relaxed inner radius (μm)	522.521	±	7.69192	371.309	±	15.2651	404.671	±	17.644	41.8116	±	5.85157
		Contracted inner radius (μm)	425.663	±	13.6271	370.541	±	15.2955	404.038	±	17.3378	40.8644	±	5.92274
		Change in inner radius (%)	-18.5264	±	2.43953	-0.209011	±	0.05671	-0.143165	±	0.137125	405.651	±	17.1626
		Stress calculations
		Relaxed circumferential stress (kPa)	143.989	±	7.4714	38.9697	±	3.96831	45.3361	±	4.47397	100.444	±	4.82249
		Contracted circumferential stress (kPa)	91.1521	±	3.82814	38.5264	±	3.82531	44.8941	±	4.39234	-0.143165	±	0.137125
		Change in circumferential stress (%)	-36.181	±	3.61227	-1.04589	±	0.240256	-0.933783	±	0.231569	45.5175	±	4.39257
	10 μM Ach + 1 μM PE	Loaded configuration
		Dilated inner radius (μm)	497.137	±	10.5169	372.913	±	15.6203	405.651	±	17.1626	44.8117	±	4.32618
		Change in inner radius (%)	13.6567	±	1.92576	0.631362	±	0.183459	0.411501	±	0.200022	-1.05069	±	0.453215
		Stress calculations
		Dilated circumferential stress (kPa)	131.11	±	8.38268	39.2668	±	4.04686	45.5175	±	4.39257	0.411501	±	0.200022
		Change in circumferential stress (%)	44.0378	±	7.90182	1.81189	±	0.451255	1.42548	±	0.238107	47.1912	±	258.122

## Sheet: SMA2 Table Lona
		MA	WT			GG			GG + L
			n	=	5	n	=	4	n	=	5
	100 mM KCl	Loaded configuration
		Relaxed inner radius (μm)	121.874	±	2.75975	83.6987	±	3.06384	83.0116	±	4.11498
		Contracted inner radius (μm)	53.8922	±	5.73544	64.1282	±	13.1858	47.2264	±	4.65534
		Change in inner radius (%)	-55.7309	±	4.73103	-22.9331	±	15.6343	-42.8665	±	5.36798
		Stress calculations
		Relaxed circumferential stress (kPa)	49.4601	±	4.52448	21.2785	±	4.52448	34.3466	±	3.45641
		Contracted circumferential stress (kPa)	24.9191	±	3.09363	16.8216	±	3.3062	21.2189	±	0.585228
		Change in circumferential stress (%)	-36.9157	±	20.5478	-35.586	±	16.167	-46.1308	±	19.0868
	1 μM PE	Loaded configuration
		Relaxed inner radius (μm)	121.318	±	2.42493	84.5213	±	4.21191	69.28	±	5.59944
		Contracted inner radius (μm)	73.339	±	1.83016	75.2891	±	8.40126	41.465	±	5.69833
		Change in inner radius (%)	-39.5593	±	0.73526	-10.969	±	8.48278	-40.6438	±	4.41426
		Stress calculations
		Relaxed circumferential stress (kPa)	49.1512	±	4.55101	21.5711	±	0.839344	26.001	±	2.95036
		Contracted circumferential stress (kPa)	32.7506	±	2.60985	19.8072	±	1.95207	17.3992	±	1.60296
		Change in circumferential stress (%)	-16.4007	±	2.01933	-1.76392	±	1.35309	-8.60173	±	1.82914
	10 μM Ach + 1 μM PE	Loaded configuration
		Dilated inner radius (μm)	120.258	±	1.68813	79.4073	±	6.53719	65.6667	±	7.61506
		Change in inner radius (%)	64.3032	±	3.84866	6.65417	±	3.74735	61.6555	±	14.9913
		Stress calculations
		Dilated circumferential stress (kPa)	49.0328	±	5.39612	20.1349	±	2.06705	23.7655	±	2.60573
		Change in circumferential stress (%)	48.0004	±	5.45702	1.49568	±	2.29969	37.4896	±	12.9079
