# Supplementary material for: Lonafarnib improves cardiovascular function and survival in a mouse model of Hutchinson-Gilford progeria syndrome
Source: eLife. 2023 Mar 17;12:e82728. doi: 10.7554/eLife.82728 (PMC10023154; doi:10.7554/eLife.82728)
Supplement: Source data 3. [file elife-82728-data3.xlsx]

## Sheet: Bodymass
Bodymass (g) - 168d
WT	GG	LONA (P21-P168)
32.34	13.08	13.6
33.06	13.37	15.09
24.59	13.53	13.65
23.03	9.19	11.48
23.15	12.1	10.69

## Sheet: Survival
GG	N=19		GG+LONA 21-168	N=6		GG+LONA 100-168	N=4		GG+RAPA 100-168	N=10		GG+LONA+RAPA	N=8
Days	Survivors		Days	Survivors		Days	Survivors		Days	Survivors		Days	Survivors
0	19		0	6		0	4		0	10		0	8
124	19		168	6		168	4		127	10		129	8
124	18		169	5		169	4		127	9		129	7
136	18								129	9		133	7
136	17								129	8		133	6
150	17								135	8		139	6
150	16								135	7		139	5
153	16								147	7		161	5
153	14								147	5		161	4
160	14								157	5		166	4
160	13								157	4		166	2
161	13								160	4		167	2
161	11								160	2
167	11								168	2
167	10
169	10
169	7
170	7
170	6
171	6
171	2
179	2
179	1
180	1
180	0
