# Supplementary material for: Lonafarnib improves cardiovascular function and survival in a mouse model of Hutchinson-Gilford progeria syndrome
Source: eLife. 2023 Mar 17;12:e82728. doi: 10.7554/eLife.82728 (PMC10023154; doi:10.7554/eLife.82728)
Supplement: Source data 4. [file elife-82728-data4.xlsx]

## Sheet: Sheet1
Area fractions
Group	Elastin	Cytoplasm	Proteoglycan	Collagen	Fibrin	Calcification
WT	0.495683	0.0229563	0.100801	0.213786	0.0130639	0.00531556
	0.495431	0.0227573	0.0972868	0.211624	0.0110626	0.00661512
	0.483514	0.0164894	0.101542	0.236892	0.00817895	0.00812878
	0.467973	0.00517553	0.143473	0.248634	0.00360113	0.00716022
	0.480838	0.00758682	0.101224	0.23818	0.00957393	0.0201923
	0.485943	0.00686313	0.124369	0.22478	0.00624359	0.0161729
	0.412723	0.0183972	0.124914	0.220277	0.0164393	0.000922685
	0.408316	0.0124779	0.122703	0.259536	0.0110379	0.00158048
	0.393187	0.0111312	0.12864	0.276128	0.00926377	0.000606998
GG	0.421712	0.00125878	0.402715	0.0478236	0.00093954	0.636749
	0.436177	0.00208967	0.338732	0.0419082	0.00684679	0.462681
	0.423869	0.0010038	0.419428	0.0185884	0.00199027	0.602768
	0.458232	0.00168726	0.287158	0.0398628	0.00257785	0.637743
	0.449658	0.00151057	0.311084	0.0416842	0.00179157	0.645292
	0.349324	0.000761189	0.434046	0.0454463	0.000860848	0.00210392
	0.33284	0.00144079	0.403059	0.0433445	0.00316033	0.000875316
	0.331638	0.00095579	0.420262	0.0501537	0.00228066	0.000433958
GG+L	0.441398	0.00299508	0.259708	0.0656235	0.00592438	0.604166
	0.462873	0.0019402	0.257593	0.0566911	0.00498364	0.628367
	0.470583	0.00331757	0.247045	0.0679161	0.00433349	0.640124
	0.363026	0.00283065	0.221651	0.17326	0.00361653	0.00291468
	0.352478	0.00383463	0.18125	0.200373	0.00485678	0.00084783
	0.361247	0.00260036	0.203633	0.160898	0.00434707	0.00173614
	0.460815	0.00198969	0.200292	0.13815	0.0028338	0.00682545
	0.419092	0.00282243	0.210005	0.111857	0.00423499	0.00160893
	0.446487	0.00186011	0.228559	0.0845942	0.002917	0.00243381
Mean ± SEM
Group	Elastin	Cytoplasm	Proteoglycan	Collagen	Fibrin	Calcification
WT	0.458 ± 0.0137	0.014 ± 0.0022	0.116 ± 0.0054	0.237 ± 0.0073	0.010 ± 0.0012	0.007 ± 0.0023
GG	0.400 ± 0.0189	0.001 ± 0.0002	0.377 ± 0.0199	0.041 ± 0.0034	0.003 ± 0.0007	0.374 ± 0.1110
GG+L	0.420 ± 0.0160	0.003 ± 0.0002	0.223 ± 0.0091	0.118 ± 0.0176	0.004 ± 0.0003	0.210 ± 0.1036
