# Supplementary material for: Lonafarnib improves cardiovascular function and survival in a mouse model of Hutchinson-Gilford progeria syndrome
Source: eLife. 2023 Mar 17;12:e82728. doi: 10.7554/eLife.82728 (PMC10023154; doi:10.7554/eLife.82728)
Supplement: Source data 5. [file elife-82728-data5.xlsx]

## Sheet: LV Function
Un-WT		Test Dates	Mouse #		Body Mass (g)	Echocardiography - SAX/PSLAX M-Mode																				Transmitral Doppler																				Left Ventricular Outflow Tract (LVOT)
						Volume (μL)		Inner Diameter (mm)		Diastolic Wall Thickness (mm)		h/di (-)				SV (μl)	CO (ml/min)	EF (%)	FS (%)	Mass		HR (bpm)	SV/m	Comments		E Peak (mm/s)	A Peak (mm/s)	E/A Ratio	DT (ms)		IVRT (ms)			IVS		IVS		IVS		IVS				Comments		LVOT Diameter (mm)	LVOT VTI (mm)	AoV VTI (mm)	AoV Area (mm2)
						diastole	systole	diastole	systole	IVS	LW (posterior)									LV (mg)	LV/B (mg/g)													E' (mm/s)	E/E'	A' (mm/s)	E'/A'	E' (mm/s)	E/E'	A' (mm/s)	E'/A'
Fbln5 +/+ @ 20-22 wks (Untreated)	M	2013-06-14	577		50	95.4702	37.0482	4.56033	3.07011	0.951351	0.981081	0.208614				58.422	18.8762	61.1982	32.679	207.932	4.15863	322.893		-		-	-	-	-		-			-	-	-	-	-	-	-	-			Heart sideways		1.44284	22.4527	40.9192	0.897163
		2013-06-07	587		25.8	76.6736	26.2997	4.15598	2.66984	0.652703	0.681081	0.157051				50.374	18.7254	65.6988	35.7585	112.825	4.37305	371.716		-		515.126	338.991	1.51958	31.9444		19.7222						1.42857				1.42857			-		1.24104	22.3331	37.5672	0.719121
		2013-06-10	592		29.4	67.9294	24.5688	3.94064	2.57114	0.908108	0.893919	0.230447				43.3606	18.3239	64.6182	34.9924	130.888	4.45199	422.419		-		901.751	619.206	1.4563	31.6667		16.3889						0.703947				0.703947			-		1.21675	29.1477	39.8486	0.850522
		2013-06-14	593		19.5	56.3793	18.0789	3.63741	2.26767	0.886824	0.581757	0.243806				38.3005	16.6293	68.7932	37.9239	75.9723	3.89602	434.643		-		743.197	540.957	1.37386	25		16.9444						0.617647				0.617647			-		1.22821	11.359	20.1589	0.66759
		2013-06-17	600		25	44.8684	15.6084	3.31702	2.16406	1.04318	0.927273	0.314494				29.26	14.3686	65.0821	34.7137	105.46	4.21842	491.448		-		574.196	392.793	1.46183	30.5556		11.9444						0.617284				0.617284			-		1.31336	13.0414	18.229	0.969211
		mean			29.94	68.2642	24.3208	3.92228	2.54856	0.888434	0.813022	0.230883				43.9434	17.3847	65.0781	35.2135	126.616	4.21962	408.624		5		683.568	472.987	1.45289	29.7917		16.25			#DIV/0!	#DIV/0!	#DIV/0!	0.841862	#DIV/0!	#DIV/0!	#DIV/0!	0.841862			4		1.28844	19.6668	31.3445	0.820721
		SD			11.7604	19.3624	8.37902	0.476853	0.358459	0.144797	0.172289	0.0572385				11.1665	1.90862	2.71349	1.89509	49.5808	0.215625	64.1076				174.637	129.597	0.0599611	3.25032		3.21951			#DIV/0!	#DIV/0!	#DIV/0!	0.393258	#DIV/0!	#DIV/0!	#DIV/0!	0.393258					0.0941752	7.37687	11.1787	0.125052
		SEM			5.25943	8.65913	3.74721	0.213255	0.160308	0.064755	0.0770498	0.0255978				4.99382	0.853561	1.21351	0.84751	22.1732	0.0964306	28.6698				87.3186	64.7984	0.0299805	1.62516		1.60975			#DIV/0!	#DIV/0!	#DIV/0!	0.196629	#DIV/0!	#DIV/0!	#DIV/0!	0.196629					0.0421164	3.29904	4.99925	0.0559251
	F	2013-06-03	572		24.3	35.719	8.05505	3.01483	1.64743	0.995495	0.94955	0.330199			6	27.664	14.4455	78.0756	45.5984	79.7242	3.28083	522.039	1.13843	-		-	-	-	-		-			-	-	-	-	-	-	-	-			No diastolic images		1.14536	17.2176	32.5471	0.545054
		2013-06-06	580		26	55.8403	13.707	3.6171	2.00531	1.0491	0.880631	0.290038			7	42.1333	16.5417	76.819	45.0857	117.313	4.51204	391.387	1.62051	-		-	-	-	-		-			-	-	-	-	-	-	-	-			No diastolic images		1.04905	42.2913	46.8784	0.779759
		2013-06-07	588		23.6	51.0844	15.987	3.49569	2.14387	0.872973	0.842342	0.249729			8	35.0974	14.5345	69.8128	39.0456	99.1191	4.19996	414.182	1.48718	LV rotated		-	-	-	-		-			-	-	-	-	-	-	-	-			No diastolic images		1.24705	23.4438	29.4375	0.972712
		2013-06-17	602		29.8	49.3219	12.7249	3.44785	1.99731	0.95303	0.95303	0.276413			9	36.597	16.2396	74.1856	42.0627	102.893	3.45279	443.709	1.22809	-		829.077	603.008	1.3749	30		17.7778			13.1259	33.804	17.5012	0.75	13.1259	63.1633	17.5012	0.75			-		-	19.5933	23.3749	-
		2013-06-17	603		26.6	52.6481	22.3499	3.54251	2.49101	0.837121	0.798485	0.236307			10	30.2982	11.6212	57.7471	29.7322	98.481	3.70229	383.32	1.13903	-		535.942	349.091	1.53525	33.0556		19.4444			15.8605	24.1682	13.9463	1.13725	15.8605	33.791	13.9463	1.13725			-		1.24035	17.6545	44.1585	0.483085
		2013-06-17	604		29.4	51.5999	16.8852	3.51853	2.23494	0.914394	0.837121	0.25988			11	34.7147	14.9186	67.2554	36.4717	105.466	3.58727	429.811	1.18077	-		1147.54	632.557	1.81412	19.7222		11.4035			38.8232	11.071	52.4114	0.740741	38.8232	29.558	52.4114	0.740741			-		1.24912	19.6211	47.1343	0.510134
		2013-06-24	606		31.4	77.2754	35.7609	4.16905	3.02494	0.811364	0.824242	0.194616			12	41.5145	15.647	53.7354	27.4454	142.137	4.52666	377.277	1.32212	-		619.64	448.417	1.38184	23.8889		16.6667			30.0802	12.5424	26.5253	1.13402	30.0802	20.5996	26.5253	1.13402			-		1.34019	21.6899	29.9367	1.02207
		2013-06-20	612		22	60.4533	21.2695	3.75931	2.44938	0.940152	1.04318	0.250087			13	39.1838	16.0914	64.8618	34.8583	134.454	6.11155	410.537	1.78108	Lv rotated		728.186	399.063	1.82474	27.2222		10.7018			16.4074	25.0214	29.8068	0.550459	16.4074	44.3815	29.8068	0.550459			-		1.25327	13.8816	13.7443	1.24595
		mean			26.6375	54.2428	18.3424	3.57061	2.24927	0.921704	0.891073					35.9004	15.0049	67.8116	37.5375	109.948	4.17167	421.533	1.36215	8		772.076	486.427	1.58617	26.7778		15.1988			22.8595	21.3214	28.0382	0.862495	22.8595	38.2987	28.0382	0.862495			5		1.21777	21.9241	33.4015	0.794108
		SD			3.31487	11.7015	8.40557	0.322706	0.413466	0.0799586	0.0835198					5.11171	1.57979	8.77954	6.71663	20.4346	0.916361	46.5441	0.242071			237.245	125.383	0.222406	5.19897		3.91979			11.0943	9.48357	15.0755	0.261756	11.0943	16.3189	15.0755	0.261756					0.0933694	8.72587	11.9602	0.296545
		SEM			1.17199	4.1371	2.97182	0.114094	0.146182	0.0282696	0.0295287					1.80726	0.558539	3.10404	2.37469	7.22473	0.323982	16.4558	0.0855852			106.099	56.073	0.099463	2.32505		1.75298			4.96154	4.24118	6.74195	0.117061	4.96154	7.29804	6.74195	0.117061					0.0352903	3.08506	4.22856	0.112083
	t-test				0.570219	0.19545	0.244026	0.193717	0.198958	0.655654	0.386068					0.189576	0.0505247	0.433444	0.381664	0.507625	0.890634	0.70836				0.540073	0.880156	0.25903	0.324694		0.672092			#DIV/0!	#DIV/0!	#DIV/0!	0.931637	#DIV/0!	#DIV/0!	#DIV/0!	0.931637					0.2315	0.628289	0.760491	0.83672
Un-KO		Test Dates	Mouse #		Body Mass (g)	Echocardiography - SAX/PSLAX M-Mode																				Transmitral Doppler																				Left Ventricular Outflow Tract (LVOT)
						Volume (μL)		Inner Diameter (mm)		Diastolic Wall Thickness (mm)						SV (μL)	CO (mL/min)	EF (%)	FS (%)	Mass		HR (bpm)		Comments		E Peak (mm/s)	A Peak (mm/s)	E/A Ratio	DT (ms)		IVRT (ms)			IVS		LW		IVS		LW				Comments		LVOT Diameter (mm)	LVOT VTI (mm)	AoV VTI (mm)	AoV Area (mm2)
						diastole	systole	diastole	systole	IVS	LW									LV (mg)	LV/B (mg/g)													A'/E'	E'/A'	A'/E'	E'/A'	A'/E'	E'/A'	A'/E'	E'/A'
Fbln5 -/- @ 20-22 wks (Untreated)	M	2013-06-10	583		39	82.36	38.4295	4.28002	3.08736	0.911261	0.918919					43.9305	17.1111	54.1647	28.091	135.25	3.46796	388.88		-		606.041	695.805	0.870993	38.3333		21.3889			1.64516	0.607843	1.53086	0.653226	1.64516	0.607843	1.53086	0.653226			-		1.36531	29.2783	52.9816	0.809047
		2013-06-10	591		27.8	64.9631	22.5289	3.87127	2.50213	0.737838	0.730743					42.4343	14.5543	65.4999	35.4202	100.163	3.60298	343.214		-		751.295	550.007	1.36597	39.1667		23.0556			1.46875	0.680851	1.08571	0.921053	1.46875	0.680851	1.08571	0.921053			-		1.2139	17.6108	50.0458	0.407259
		2013-06-14	594		26.2	75.5452	37.171	4.12337	3.06662	0.758108	0.658559					38.3742	14.2861	51.0029	25.6769	111.4	4.2519	372.654		RV dilated		612.47	393.15	1.55785	38		19.4444			1.72727	0.578947	1.53165	0.652893	1.72727	0.578947	1.53165	0.652893			-		1.38852	12.4209	29.7188	0.632871
		2013-06-20	613		23.9	54.6726	24.6801	3.59163	2.57645	0.888636	0.940152					29.9926	14.0769	55.8177	28.517	112.529	4.70832	470.069		-		508.598	617.974	0.823009	31.3889		17.2222			1.97959	0.505155	2.14894	0.465347	1.97959	0.505155	2.14894	0.465347			-		1.18703	20.0567	33.8206	0.656281
		2013-06-24	615		29.1	49.6057	17.906	3.45231	2.27451	0.759848	0.785606					31.6997	13.822	64.2988	34.226	88.546	3.04282	431.256		-		-	-	-	-		-			-	-	-	-	-	-	-	-			No diastolic images		1.71838	14.0225	24.1773	1.34507
		2013-06-24	619		25.2	52.946	16.0038	3.55738	2.18696	0.798485	0.772727					36.9422	13.7274	69.7574	38.5168	89.7762	3.56255	372.463		-		428.238	530.084	0.807868	41.9444		10.2778			1.77551	0.563218	1.5	0.666667	1.77551	0.563218	1.5	0.666667			-		1.31661	-	20.7718	-
		mean			28.5333	63.3488	26.1199	3.81267	2.61567	0.809029	0.801118					37.2289	14.5963	60.0902	31.7413	106.277	3.77275	396.423		6		581.328	557.404	1.08514	37.7667		18.2778			1.71926	0.587203	1.55943	0.671837	1.71926	0.587203	1.55943	0.671837			5		1.36496	18.6778	35.2527	0.770106
		SD			5.44855	13.3052	9.57522	0.335343	0.384828	0.0734571	0.109115					5.59172	1.26856	7.43475	5.02221	17.4862	0.600596	46.1826				121.651	112.476	0.351346	3.88798		4.97447			0.186579	0.0643647	0.379817	0.162387	0.186579	0.0643647	0.379817	0.162387					0.190933	6.63759	13.4029	0.351976
		SEM			2.22436	5.43184	3.90907	0.136903	0.157105	0.0299887	0.0445458					2.28281	0.517889	3.03523	2.05031	7.1387	0.245192	18.854				54.4038	50.301	0.157127	1.73876		2.22465			0.0834407	0.0287848	0.169859	0.0726219	0.0834407	0.0287848	0.169859	0.0726219					0.0779479	2.96842	5.4717	0.157408
	F	2013-06-03	573		28.8	41.7148	10.7333	3.10662	1.74151	0.804054	0.872973					30.9815	12.3394	77.5011	45.1684	78.6016	2.72922	407.267		LV rotated		-	-	-	-		-			-	-	-	-	-	-	-	-			No diastolic images		1.00533	16.5691	31.3278	0.419838
		2013-06-07	589		26.9	91.1557	39.0362	4.46906	3.13566	1.01881	0.990766					52.1194	24.9965	57.0927	29.8087	177.445	6.59648	480.152		-		-	-	-	31.3889		14.4444			0.952381	1.05	1.15854	0.863158	0.952381	1.05	1.15854	0.863158			-		1.00288	29.5895	50.4725	0.463097
		2013-06-07	609		25.4	59.0161	23.2209	3.71968	2.52961	0.808784	0.7875					35.7953	12.3035	60.9732	32.0849	94.6359	3.72582	343.633		-		-	-	-	-		-			-	-	-	-	-	-	-	-			Apical 4-ch sideways		1.35348	12.3897	50.3461	0.354069
		2013-06-24	620		27.5	59.913	11.891	3.74284	1.93976	0.978788	1.01742					48.022	21.8442	79.895	48.0575	139.804	5.08378	454.908		-		209.065	330.296	0.632964	30.5556		21.6667			1.19355	0.837838	1.28	0.78125	1.19355	0.837838	1.28	0.78125			-		1.26061	22.7117	29.6628	0.955634
		2013-12-06	773		25.9	64.4166	24.4391	3.85679	2.5909	0.782883	0.822523					39.9776	15.031	61.962	32.7899	115.584	4.4627	376.108		-		794.74	641.905	1.23809	33.8889		11.5789			1.07627	0.929134	0.877778	1.13924	1.07627	0.929134	0.877778	1.13924			-		1.08194	13.9445	24.4372	0.52463
		2015-04-30	416		26.1	42.4305	13.489	3.24219	2.0423	0.95	0.95					28.9415	11.4997	68.2333	37.0118	96.5508	3.69927	396.607		-		804.645	565.574	1.42271	37.5		14.2424			1.7541	0.570093	1.65306	0.604938	1.7541	0.570093	1.65306	0.604938			-		1.45853	21.6882	36.52	0.992227
		2015-05-14	451		24.7	53.5304	19.7832	3.57283	2.381	0.931532	0.921622					33.7471	12.4053	62.9963	33.3425	127.437	5.1594	367.562		-		437.081	544.116	0.803287	28.6111		15			2.44444	0.409091	1.59375	0.627451	2.44444	0.409091	1.59375	0.627451			-		1.18312	21.0537	47.1492	0.490915
		mean			26.4714	58.8825	20.3704	3.67286	2.33725	0.896407	0.908973					38.5121	15.7742	66.9505	36.8948	118.58	4.49381	403.748		7		561.383	520.473	1.02426	32.3889		15.3865			1.48415	0.759231	1.31263	0.803208	1.48415	0.759231	1.31263	0.803208			4		1.19227	19.7066	38.5594	0.600059
		SD			1.37927	16.6699	9.87897	0.445528	0.472689	0.0957155	0.0854598					8.71912	5.41467	8.69816	7.02243	33.3163	1.26149	48.6578				290.523	133.549	0.368069	3.42805		3.75112			0.618189	0.263611	0.319698	0.216331	0.618189	0.263611	0.319698	0.216331					0.175414	5.90234	10.7213	0.261273
		SEM			0.521314	6.30062	3.7339	0.168394	0.17866	0.036177	0.0323008					3.29552	2.04655	3.28759	2.65423	12.5924	0.476798	18.3909				145.261	66.7746	0.184035	1.53307		1.67755			0.276462	0.117891	0.142973	0.096746	0.276462	0.117891	0.142973	0.096746					0.0663001	2.23088	4.05226	0.0987518
	t-test				0.404249	0.602065	0.310732	0.532817	0.26665	0.0901376	0.0800645					0.755316	0.594841	0.153471	0.15338	0.416675	0.212111	0.786146				0.90413	0.674299	0.809244	0.0494145		0.331969			0.454635	0.222022	0.29949	0.3115	0.454635	0.222022	0.29949	0.3115					0.121386	0.788693	0.638124	0.390394
Un-OLD		Test Dates	Mouse #		Body Mass (g)	Echocardiography - SAX/PSLAX M-Mode																				Transmitral Doppler																				Left Ventricular Outflow Tract (LVOT)
						Volume (μL)		Inner Diameter (mm)		Diastolic Wall Thickness (mm)		h/di (-)				SV (μL)	CO (mL/min)	EF (%)	FS (%)	Mass		HR (bpm)		Comments		E Peak (mm/s)	A Peak (mm/s)	E/A Ratio	DT (ms)		IVRT (ms)			IVS		LW		IVS		LW				Comments		LVOT Diameter (mm)	LVOT VTI (mm)	AoV VTI (mm)	AoV Area (mm2)
						diastole	systole	diastole	systole	IVS	LW									LV (mg)	LV/B (mg/g)													A'/E'	E'/A'	A'/E'	E'/A'	A'/E'	E'/A'	A'/E'	E'/A'
Fbln5 +/+ @ 100-110 wks (Untreated)	M	2015-05-14	722		32.9	92.4343	39.6756	4.49553	3.14928	1.1	1.08018	0.244688				52.7587	25.235	57.1496	29.969	216.939	6.5939	478.558		-		787.259	858.606	0.916904	33.6111		-			1.45794	0.685897	1.3	0.769231	1.45794	0.685897	1.3	0.769231			-		1.49903	25.5756	53.5308	0.843202
		2015-05-21	733		24.2	77.2891	31.8612	4.16912	2.88087	1.10991	0.911712	0.266222				45.4279	15.4341	58.6501	30.8627	177.774	7.34605	341.68		Irregular ECG		595.813	599.874	0.99323	32.2222		-			1.68919	0.592	1.42466	0.701923	1.68919	0.592	1.42466	0.701923			-		1.56055	20.2682	47.0057	0.824735
		2015-05-14	736		29.5	68.7652	33.2809	3.95812	2.91148	0.961261	1.0009	0.242858				35.4843	15.0508	52.3797	26.6424	163.347	5.53719	423.638		Dying Mouse		588.502	454.475	1.29491	30.2778		-			1.71622	0.582677	1.53571	0.651163	1.71622	0.582677	1.53571	0.651163			-		1.51964	20.1201	33.4604	1.09061
		2015-04-30	740		30.1	69.3495	19.707	3.98279	2.37706	1.2	1.2	0.301296				49.6425	23.493	71.5515	40.3039	217.315	7.21975	473.373		-		479.826	711.011	0.674851	34.0351		-			1.20779	0.827957	-	-	1.20779	0.827957	-	-			No LW A'		1.35635	25.2804	54.6003	0.668992
		2015-04-09	742		31.2	106.72	46.9889	4.77229	3.36085	0.881982	0.872072	0.184813				59.7313	27.0818	56.676	29.7705	171.632	5.50102	453.519		-		671.345	513.646	1.30702	33.8889		-			1.14504	0.873333	1.58871	0.629442	1.14504	0.873333	1.58871	0.629442			-		1.31308	33.7586	39.3119	1.16288
		2015-05-21	747		30.2	68.9194	23.8088	3.96765	2.53709	1.1991	1.26847	0.302219				45.1106	19.5655	66.1856	36.2876	194.334	6.43491	433.682		-		805.435	-	-	29.7222		-			-	-	-	-	-	-	-	-			No A Wave		1.31398	30.8706	45.3929	0.922206
		mean			29.6833	80.5796	32.5537	4.22425	2.86944	1.07538	1.05556	0.257016				48.0259	20.9767	60.4321	32.306	190.224	6.4388	434.075		6		654.697	627.522	1.03738	32.2929		-			1.44324	0.712373	1.46227	0.68794	1.44324	0.712373	1.46227	0.68794			6		1.42711	25.9789	45.5503	0.918772
		SD			2.93899	15.7248	10.0161	0.338216	0.36731	0.128888	0.157573	0.043942				8.18012	5.09048	7.06602	5.01737	23.1842	0.793648	50.0942				125.699	161.282	0.267822	1.89706		-			0.264378	0.133491	0.127968	0.0621244	0.264378	0.133491	0.127968	0.0621244					0.111668	5.51436	8.15862	0.182249
		SEM			1.19984	6.41963	4.08907	0.138076	0.149954	0.0526184	0.064329	0.0179393				3.33952	2.07818	2.88469	2.04833	9.4649	0.324005	20.4509				51.3162	72.1275	0.119774	0.774471		-			0.118233	0.059699	0.063984	0.0310622	0.118233	0.059699	0.063984	0.0310622					0.0455883	2.25123	3.33074	0.0744029
	F	2014-09-16	465		30.5	105.134	46.3427	4.74596	3.34999	0.901802	0.901802	0.190015			7	58.7912	27.3417	56.3872	29.5423	165.622	5.43024	465.135		Dermatitis		911.945	526.553	1.73192	37.7778		-			1.33636	0.748299	1.5	0.666667	1.33636	0.748299	1.5	0.666667			-		1.61272	25.474	46.7427	1.11325
		2014-11-18	484		42.1	85.9694	44.429	4.36224	3.30085	0.772973	0.713514	0.177197			8	41.5405	16.5951	48.3638	24.3423	128.272	3.04684	399.513		-		863.94	631.806	1.36741	37.5		-			0.811688	1.232	1.60748	0.622093	0.811688	1.232	1.60748	0.622093			-		1.43652	15.8142	41.9967	0.610303
		2014-11-18	486		43.1	57.4143	11.4895	3.66758	1.88274	1.02613	0.98018	0.279783			9	45.9248	20.9526	80.7754	49.0016	130.746	3.03355	456.662		-		891.28	634.151	1.40547	31.9444		-			1.46914	0.680672	0.769231	1.3	1.46914	0.680672	0.769231	1.3			Good Images		1.023	32.0695	47.0338	0.560429
		2014-12-04	492		42.8	76.0126	25.7555	4.13538	2.62264	0.921622	0.951351	0.222862			10	50.257	27.148	66.6734	36.7556	151.946	3.55015	539.455		Dilated RV		985.496	-	-	28.6111		-			-	-	-	-	-	-	-	-			Bad Images		1.17086	41.6938	55.6151	0.807193
		2014-09-16	495		29.1	62.5362	16.0816	3.81009	2.19013	0.85	0.811712	0.223092			11	46.4546	23.7549	74.2247	42.4905	116.267	3.99545	511.365		Dermatitis		820.974	640.746	1.28128	31.9444		-			1.39552	0.716578	1.07772	0.927885	1.39552	0.716578	1.07772	0.927885			-		1.40212	22.3414	28.5194	1.20957
		2014-12-11	501		36.3	91.9161	47.3624	4.45293	3.29827	1.01081	1.01081	0.226999			12	44.5536	17.0927	51.7061	26.7942	168.986	4.65525	383.791		-		570.12	460.058	1.23923	25.5556		-			1.65934	0.602649	1.72973	0.578125	1.65934	0.602649	1.72973	0.578125			Good Images		1.17938	21.6218	38.8856	0.60744
		2014-12-04	507		24.9	58.9963	27.273	3.72016	2.70626	0.903604	0.911261	0.242894			13	31.7233	13.3006	53.8662	27.2776	102.554	4.11863	419.341		Dilated RV		752.054	535.781	1.40366	23.0556		-			1.48	0.675676	1.44444	0.692308	1.48	0.675676	1.44444	0.692308			-		1.22193	22.3771	28.4698	0.921727
		2014-12-11	523		33.6	109.923	48.2657	4.84257	3.4039	0.941441	0.981081	0.194409			14	61.657	27.6342	56.5496	29.8414	190.966	5.6835	447.509		-		807.852	609.742	1.32491	34.1667		-			1.36207	0.734177	1.58333	0.631579	1.36207	0.734177	1.58333	0.631579			Good Images		1.43474	27.1018	45.3336	0.966532
		2014-10-21	524		20.6	22.8451	0.636309	2.51121	0.621158	0.85	1.12568	0.338482			15	22.2088	9.23611	97.1834	75.224	69.7093	3.38395	415.786		Dilated RV / Dying Mouse		753.306	463.247	1.62614	46.6667		-			2.39024	0.418367	1.56701	0.638158	2.39024	0.418367	1.56701	0.638158			-		-	24.2879	38.2249	-
		2015-04-30	732		31.1	91.9216	38.885	4.4875	3.13034	-	-				16	53.0366	25.5941	57.6916	30.2407	195.536	6.28732	482.574		SAX Only		740.559	570.817	1.29737	35		-			0.843011	1.18623	0.742647	1.34654	0.843011	1.18623	0.742647	1.34654			-		1.35763	28.2972	41.4787	0.987576
		mean			33.41	76.2668	30.6521	4.07356	2.65063	0.908709	0.931932					45.6147	20.865	64.3421	37.151	142.06	4.31849	452.113		10		809.753	563.656	1.4086	33.2222		-			1.41638	0.777183	1.33573	0.822594	1.41638	0.777183	1.33573	0.822594			10		1.31543	26.1079	41.23	0.864891
		SD			7.70908	26.3445	17.0264	0.686859	0.885263	0.0797192	0.118519					11.8647	6.52246	15.4368	15.4436	40.0111	1.15302	49.5614				115.359	71.327	0.165023	6.7538		-			0.463474	0.264424	0.374487	0.301097	0.463474	0.264424	0.374487	0.301097					0.180363	7.00909	8.34935	0.233511
		SEM			2.43782	8.33086	5.38423	0.217204	0.279945	0.0265731	0.0395063					3.75195	2.06258	4.88156	4.88369	12.6526	0.364617	15.6727				36.4796	23.7757	0.0550078	2.13574		-			0.154491	0.0881413	0.124829	0.100366	0.154491	0.0881413	0.124829	0.100366					0.0601211	2.21647	2.6403	0.0778372
	t-test				0.194202	0.68797	0.782617	0.567745	0.502953	0.0235265	0.137064					0.63885	0.970156	0.502197	0.378594	0.00868261	0.000717073	0.498997				0.0336924	0.439562	0.032009	0.690219		-			0.892487	0.554029	0.386734	0.230745	0.892487	0.554029	0.386734	0.230745					0.162715	0.968075	0.331491	0.625466
Tr-WT		Test Dates	Mouse #		Body Mass (g)	Echocardiography - SAX/PSLAX M-Mode																				Transmitral Doppler																				Left Ventricular Outflow Tract (LVOT)
						Volume (μL)		Inner Diameter (mm)		Diastolic Wall Thickness (mm)						SV (μL)	CO (mL/min)	EF (%)	FS (%)	Mass		HR (bpm)		Comments		E Peak (mm/s)	A Peak (mm/s)	E/A Ratio	DT (ms)		IVRT (ms)			IVS		LW		IVS		LW				Comments		LVOT Diameter (mm)	LVOT VTI (mm)	AoV VTI (mm)	AoV Area (mm2)
						diastole	systole	diastole	systole	IVS	LW									LV (mg)	LV/B (mg/g)													A'/E'	E'/A'	A'/E'	E'/A'	A'/E'	E'/A'	A'/E'	E'/A'
Fbln5 +/+ @ 20-22 wks (NaCl & L-NAME)	M	2013-07-25	645		27.4	61.0984	18.9129	3.77464	2.33758	0.991667	1.00455					42.1855	16.1391	69.0154	38.0582	145.419	5.30725	382.678		-		846.204	598.629	1.41357	22.2222		-			0.896552	1.11539	0.7375	1.35593	0.896552	1.11539	0.7375	1.35593			-		1.07732	17.2369	25.1037	0.625899
		2013-07-29	653		24.7	70.4482	30.1566	4.00901	2.82241	0.85	0.875758					40.2916	13.6396	57.1869	29.5962	126.814	5.13417	338.588		-		524.959	326.896	1.60589	37.5		-			0.669291	1.49412	0.864865	1.15625	0.669291	1.49412	0.864865	1.15625			-		1.02423	26.2129	53.3916	0.404509
		2013-07-29	656		25.9	54.9962	16.4467	3.61106	2.20226	0.901515	0.965909					38.5495	16.1884	70.1947	39.0477	120.345	4.64653	419.204		-		627.035	369.899	1.69515	34.7222		-			0.637255	1.56923	0.981818	1.01852	0.637255	1.56923	0.981818	1.01852			-		1.20658	20.2927	48.0316	0.483077
		2013-08-26	670		26.9	68.4832	37.212	3.95886	3.07129	0.926577	0.865315					31.2712	11.2938	45.7661	22.4431	143.194	5.32319	361.251		-		604.403	282.836	2.13694	23.0556		-			0.971429	1.02941	0.929825	1.07547	0.971429	1.02941	0.929825	1.07547			BAD Apical Window		1.26873	21.7079	26.4831	1.03629
		2013-12-06	779		25.6	53.0048	14.0584	3.54305	2.03497	0.990991	0.981081					38.9464	16.0768	74.6027	42.9753	112.448	4.39251	414.902		-		949.117	753.058	1.26035	34.7222		-			0.778443	1.28462	1.38532	0.721854	0.778443	1.28462	1.38532	0.721854			BAD Apical Window		1.32357	21.4455	33.1192	0.890924
		2014-08-21	182		21.3	53.3938	21.5934	3.56832	2.46384	0.85	0.857658					31.8005	10.6458	59.6144	30.9659	88.7041	4.16451	333.703		-		639.904	388.961	1.64516	32.2222		-			1.12791	0.886598	0.610526	1.63793	1.12791	0.886598	0.610526	1.63793			-		1.21844	29.9382	51.6027	0.676471
		2014-08-21	184		30.1	85.3735	30.9674	4.34856	2.85066	0.735135	0.758108					54.4061	21.0264	63.7884	34.4637	133.987	4.45139	386.474		-		663.403	419.889	1.57995	29.4444					1.58654	0.630303	1.64894	0.606452	1.58654	0.630303	1.64894	0.606452			-		1.327	34.7721	59.8487	0.803545
		2014-08-12	188		26.2	89.7149	50.236	4.4326	3.4747	0.758108	0.788739					39.4789	18.4844	43.9491	21.5903	128.4	4.90078	467.934		-		696.421	542.333	1.28412	26.1111		-			0.790123	1.26562	0.816514	1.22472	0.790123	1.26562	0.816514	1.22472			-		1.28424	13.8923	27.7727	0.647941
		2014-08-12	190		23.4	68.9506	32.6065	3.97031	2.91252	0.85	0.681532					36.3441	15.7839	52.706	26.6389	104.966	4.48574	434.239		-		523.367	431.351	1.21332	31.6667		-			1.14167	0.875912	0.94186	1.06173	1.14167	0.875912	0.94186	1.06173			-		1.17664	15.9167	22.1193	0.782463
		2014-08-05	192		24.4	60.5836	17.5502	3.76324	2.26552	0.828345	0.761408					43.0334	18.3343	71.0263	39.7962	98.5065	4.03715	425.372		-		627.531	328.318	1.91135	30.8333		-			1.32143	0.756757	-	-	1.32143	0.756757	-	-			-		1.28037	22.8351	48.7676	0.602881
		2014-11-04	256		25.4	58.1344	27.7833	3.67891	2.67979	0.85	0.85					30.351	10.5215	54.134	27.6613	123.63	4.86732	347.044		-		660.058	519.404	1.2708	29.1667		-			1.57812	0.633663	1.57377	0.635417	1.57812	0.633663	1.57377	0.635417			-		1.34011	29.7165	37.777	1.10953
		2014-11-11	257		22.1	52.3483	15.9165	3.53392	2.17659	0.926577	0.888288					36.4317	12.2952	69.7395	38.4524	116.9	5.28961	338.135		-		773.965	402.547	1.92267	24.1667		-			1.40964	0.709402	0.688889	1.45161	1.40964	0.709402	0.688889	1.45161			-		1.13753	23.8155	36.5896	0.661479
		mean			25.2833	64.7108	26.12	3.84937	2.60768	0.871576	0.856528					38.5908	15.0358	60.977	32.6408	120.276	4.75001	387.46		12		678.031	447.01	1.57827	29.6528		#DIV/0!			1.0757	1.02092	1.01635	1.08599	1.0757	1.02092	1.01635	1.08599			12		1.22206	23.1485	39.2172	0.727084
		SD			2.37978	12.4423	10.78	0.303411	0.432629	0.0802556	0.0976262					6.49391	3.38396	10.3295	7.16363	17.1706	0.453552	44.6377				124.764	134.409	0.301966	4.92384		#DIV/0!			0.338801	0.326332	0.356905	0.332594	0.338801	0.326332	0.356905	0.332594					0.10191	6.1816	12.7197	0.208897
		SEM			0.686982	3.59178	3.11191	0.0875873	0.124889	0.0231678	0.0281822					1.87463	0.976866	2.98188	2.06796	4.95673	0.130929	12.8858				36.0162	38.8005	0.0871701	1.42139		#DIV/0!			0.0978034	0.0942039	0.107611	0.100281	0.0978034	0.0942039	0.107611	0.100281					0.029419	1.78448	3.67186	0.0603035
	F	2013-07-25	641		24.6	62.1304	17.7939	3.80257	2.27612	0.837121	0.888636					44.3365	16.0895	71.2271	40.093	108.257	4.40069	362.96		-		791.878	507.712	1.5597	25		-			0.946667	1.05634	1.20779	0.827957	0.946667	1.05634	1.20779	0.827957			-		-	11.8918	20.9294	-
		2013-08-08	663		22.7	30.9894	3.69596	2.83045	1.2338	1.06894	1.00455					27.2934	16.0595	87.972	56.3211	100.495	4.4271	589.35		-		931.332	630.788	1.47646	27.5		-			1.66667	0.6	0.768293	1.30159	1.66667	0.6	0.768293	1.30159			-		1.36058	36.5697	56.1377	0.947118
		2013-08-09	668		25.1	71.3933	25.1907	4.02143	2.59156	1.0303	1.05606					46.2026	16.5261	65.5735	35.823	143.996	5.73688	358.671		-		601.614	382.243	1.57391	27.7778		-			2.13207	0.469027	1.10465	0.905263	2.13207	0.469027	1.10465	0.905263			-		1.12246	30.0038	33.5501	0.884948
		2013-08-26	673		21	60.5238	22.9182	3.75919	2.5199	0.880631	0.903604					37.6056	12.657	61.9088	32.8962	116.699	5.55709	336.508		-		904.813	639.435	1.41502	16.3889		-			2.57143	0.388889	0.948718	1.05405	2.57143	0.388889	0.948718	1.05405			BAD Apical Window		-	9.39357	20.6763	-
		2013-08-26	675		19.5	55.698	26.4148	3.62598	2.66373	0.85	0.772727					29.2833	10.2996	52.8613	26.6042	97.4067	4.99521	351.224		-		671.602	469.85	1.4294	24.7222		-			0.850746	1.17544	0.527273	1.89655	0.850746	1.17544	0.527273	1.89655			-		1.13405	24.0782	42.6658	0.570031
		2013-12-12	790		23.2	62.5353	25.9332	3.80797	2.64621	0.812613	0.852252					36.602	12.5024	58.7669	30.5695	110.926	4.78128	341.614		-		409.531	323.523	1.26585	36.9444		-			1.80556	0.553846	0.697987	1.43269	1.80556	0.553846	0.697987	1.43269			-		1.06955	22.5855	35.4941	0.571701
		2014-08-19	195		22.4	61.6961	19.5631	3.7896	2.3674	0.842342	0.842342					42.133	18.2499	68.3633	37.5491	119.582	5.3385	432.985		-		607.42	404.73	1.5008	28.0556		-			0.77551	1.28947	0.684524	1.46087	0.77551	1.28947	0.684524	1.46087			Good Measurements		1.52819	17.723	38.2766	0.849284
		2014-08-26	199		22	54.6573	19.6791	3.59666	2.34755	0.895946	0.895946					34.9782	11.7121	64.756	34.9596	100.696	4.57711	334.449		-		680.295	436.847	1.55729	24.1667		-			0.988636	1.01149	0.79845	1.25243	0.988636	1.01149	0.79845	1.25243			Good Measurements		1.26846	19.416	43.0577	0.569844
		2014-11-04	240		26.5	76.7911	32.058	4.15831	2.88297	0.727477	0.727477					44.7331	20.3156	58.4742	30.7331	133.03	5.02001	452.83		-		575.49	-	-	35		-			0.965517	1.03571	0.777778	1.28571	0.965517	1.03571	0.777778	1.28571			No A Wave		1.15452	22.4794	31.1703	0.754979
		2014-11-11	250		21.1	56.0634	11.5335	3.63532	1.89367	0.872973	0.872973					44.53	18.34	80.0461	48.1658	99.6717	4.72378	412.678		-		615.465	431.662	1.4258	31.3889		-			1.42268	0.702899	1.22881	0.813793	1.42268	0.702899	1.22881	0.813793			-		1.21312	24.9686	38.3634	0.752268
		mean			22.81	59.2478	20.4781	3.70275	2.34229	0.881835	0.881656					38.7698	15.2752	66.9949	37.3715	113.076	4.95577	397.327		10		678.944	469.643	1.46714	27.6944		#DIV/0!			1.41255	0.828312	0.874428	1.22309	1.41255	0.828312	0.874428	1.22309			10		1.23137	21.9109	36.0322	0.737522
		SD			2.11369	12.1306	8.14852	0.353313	0.473376	0.100289	0.096825					6.73646	3.30801	10.5573	8.92908	15.5429	0.464177	79.5946				158.443	107.219	0.0972628	5.86053		#DIV/0!			0.614445	0.320953	0.237892	0.336354	0.614445	0.320953	0.237892	0.336354					0.151153	8.00018	10.5517	0.152289
		SEM			0.668406	3.83605	2.57679	0.111727	0.149695	0.0317141	0.0306188					2.13026	1.04608	3.33852	2.82362	4.9151	0.146786	25.17				50.1041	35.7398	0.0324209	1.85326		#DIV/0!			0.194304	0.101494	0.075228	0.106365	0.194304	0.101494	0.075228	0.106365					0.0534407	2.52988	3.33675	0.0538423
	t-test				0.0179134	0.311287	0.178007	0.315427	0.189732	0.797053	0.552972					0.950383	0.868884	0.194545	0.193997	0.314735	0.308582	0.732493				0.98836	0.672743	0.252106	0.412947		#DIV/0!			0.144732	0.18	0.294405	0.360227	0.144732	0.18	0.294405	0.360227					0.881483	0.694386	0.528191	0.898723
Tr-KO		Test Dates	Mouse #		Body Mass (g)	Echocardiography - SAX/PSLAX M-Mode																				Transmitral Doppler																				Left Ventricular Outflow Tract (LVOT)
						Volume (μL)		Inner Diameter (mm)		Diastolic Wall Thickness (mm)						SV (μL)	CO (mL/min)	EF (%)	FS (%)	Mass		HR (bpm)		Comments		E Peak (mm/s)	A Peak (mm/s)	E/A Ratio	DT (ms)		IVRT (ms)			IVS		LW		IVS		LW				Comments		LVOT Diameter (mm)	LVOT VTI (mm)	AoV VTI (mm)	AoV Area (mm2)
						diastole	systole	diastole	systole	IVS	LW									LV (mg)	LV/B (mg/g)													A'/E'	E'/A'	A'/E'	E'/A'	A'/E'	E'/A'	A'/E'	E'/A'
Fbln5 -/- @ 20-22 wks (NaCl & L-NAME)	M	2013-08-16	678		28	57.7272	14.675	3.68725	2.11171	1.05606	0.95303					43.0522	14.4371	74.4258	42.6703	130.985	4.67804	335.476		Dilated RV		-	-	-	-		-			-	-	-	-	-	-	-	-			No Diastolic Meas		1.1224	61.669	44.7883	1.36235
		2013-08-16	679		-	48.0699	12.3222	3.41688	1.96609	0.965909	0.927273					35.7477	11.8728	74.4906	42.5039	118.894	-	332.116		-		509.327	305.159	1.66906	30.5556		-			1.22581	0.815789	1.22807	0.814286	1.22581	0.815789	1.22807	0.814286			-		1.21887	25.3694	24.3955	1.21339
		2013-12-06	780		25.9	68.699	27.4152	3.95016	2.68898	0.796396	0.765766					41.2837	14.3707	60.8016	32.1195	114.781	4.4317	348.971		-		953.636	-	-	36.3889		-			1.79381	0.557471	2.40323	0.416107	1.79381	0.557471	2.40323	0.416107			No A Wave		1.15958	17.5105	45.2087	0.409042
		2013-12-12	787		25.4	74.5657	27.4409	4.0891	2.70386	0.921622	0.852252					47.1248	13.8311	63.2455	33.8722	129.499	5.0984	295.025		-		967.967	1021.07	0.947989	43.6111		-			2.57692	0.38806	1.46032	0.684783	2.57692	0.38806	1.46032	0.684783			-		1.27762	22.7926	47.3144	0.617578
		2014-08-14	181		25.8	78.2542	29.7237	4.18891	2.8008	0.742793	0.811712					48.5305	18.2141	62.1449	33.1743	101.034	3.91605	374.548		-		785.228	-	-	48.3333		-			0.788793	1.26776	1.98095	0.504808	0.788793	1.26776	1.98095	0.504808			No A Wave		1.28757	21.3179	37.3354	0.743454
		mean			26.275	65.4632	22.3154	3.86646	2.45429	0.896556	0.862007					43.1478	14.5452	67.0217	36.8681	119.039	4.53105	337.227		5		804.04	663.117	1.30852	39.7222		#DIV/0!													4		1.21321	29.7319	39.8085	0.869163
		SD			1.17011	12.4429	8.14559	0.314159	0.385075	0.127038	0.0781536					5.07531	2.29971	6.84358	5.25824	12.1907	0.493824	28.9007				213.277	506.229	0.509871	7.84036		#DIV/0!															0.0721663	18.0785	9.40712	0.403898
		SEM			0.585057	5.56466	3.64282	0.140496	0.172211	0.0568133	0.0349513					2.26975	1.02846	3.06054	2.35155	5.45187	0.246912	12.9248				106.638	357.958	0.360534	3.92018		#DIV/0!															0.0322737	8.08494	4.20699	0.180629
	F	2013-07-25	639		24.4	59.2128	16.7722	3.72567	2.21192	0.875758	0.875758					42.4406	13.1393	71.718	40.6461	108.561	4.4492	309.578		-		482.244	724.733	0.66541	36.9444		-			0.779661	1.28261	0.875	1.14286	0.779661	1.28261	0.875	1.14286			-		1.21633	25.7004	40.9243	0.729714
		2013-07-25	640		22.7	41.5174	8.31789	3.21553	1.68995	0.927273	0.927273					33.1995	16.1901	80.0242	47.4649	103.702	4.56837	487.7		-		672.395	503.486	1.33548	35.5556		-			1.27273	0.785714	1.35484	0.738095	1.27273	0.785714	1.35484	0.738095			-		1.06134	14.0334	41.2078	0.301288
		2013-08-08	662		24.4	73.6406	30.3503	4.08069	2.82487	0.824242	0.862879					43.2903	12.3494	58.8115	30.7778	122.753	5.03086	286.489		-		724.722	615.687	1.1771	39.4444		-			1.8125	0.551724	2.05714	0.486111	1.8125	0.551724	2.05714	0.486111			-		1.21461	29.475	42.1256	0.810728
		2013-08-09	667		24	41.5289	12.3969	3.14926	1.95406	0.927273	0.965909					29.132	8.92449	68.8698	37.4288	95.2176	3.9674	305.485		-		573.489	275.216	2.08378	23.3333		-			1.56522	0.638889	1.43104	0.698795	1.56522	0.638889	1.43104	0.698795			-		1.13852	25.6512	35.2261	0.741337
		2014-08-05	193		25.7	58.1011	19.5196	3.69363	2.35344	0.827027	0.865315					38.5814	16.1559	66.8247	36.4146	99.3013	3.86386	418.683		-		780.615	693.294	1.12595	33.3333		-			1.75472	0.569892	1.61404	0.619565	1.75472	0.569892	1.61404	0.619565			-		1.32966	16.0994	31.3348	0.713435
		2014-08-26	198		25.4	47.8562	10.0898	3.41034	1.82491	0.98018	0.94955					37.7664	15.2133	78.8843	46.474	115.612	4.55166	402.856		-		381.741	246.114	1.55107	32.2222		-			0.544118	1.83784	0.701299	1.42593	0.544118	1.83784	0.701299	1.42593			Not Best Meas		1.27382	25.9176	38.1518	0.865735
		2014-11-04	241		25.2	67.0646	28.1041	3.92594	2.72663	0.911261	0.911261					38.9604	13.3989	58.5189	30.6678	114.201	4.53179	343.905		-		707.834	687.198	1.03003	36.3889		-			1.7	0.588235	1.35051	0.740458	1.7	0.588235	1.35051	0.740458			-		1.34393	19.4085	37.9583	0.725313
		2014-11-11	251		21.4	47.6966	14.8151	3.40583	2.10745	0.827027	0.85					32.8815	12.7452	69.1953	38.2051	95.7529	4.47443	386.116		-		670.788	-	-	38.3333		-			1.28472	0.778378	1.504	0.664894	1.28472	0.778378	1.504	0.664894			-		1.27517	16.4874	35.0492	0.600763
		mean			24.15	54.5773	17.5458	3.57586	2.21165	0.887505	0.900993					37.0315	13.5146	69.1058	38.5099	106.888	4.4297	367.602		8		624.229	535.104	1.28126	34.4444		#DIV/0!			1.33921	0.87916	1.36098	0.814588	1.33921	0.87916	1.36098	0.814588			8		1.23167	21.5966	37.7472	0.686039
		SD			1.45798	11.8718	8.05907	0.334205	0.407132	0.0582744	0.0436391					4.9194	2.39624	7.97295	6.26918	10.0853	0.366878	68.6447				134.996	201.108	0.446679	5.08525		#DIV/0!			0.467601	0.454494	0.421823	0.310435	0.467601	0.454494	0.421823	0.310435					0.0956834	5.76111	3.70719	0.173371
		SEM			0.515475	4.19733	2.84931	0.118159	0.143943	0.0206031	0.0154288					1.73927	0.847199	2.81886	2.21649	3.56568	0.129711	24.2696				47.7283	76.0116	0.168829	1.79791		#DIV/0!			0.165322	0.160688	0.149137	0.109755	0.165322	0.160688	0.149137	0.109755					0.0338292	2.03686	1.31069	0.0612959
	t-test				0.027577	0.155561	0.330644	0.147639	0.307716	0.886722	0.349634					0.063204	0.459255	0.627637	0.622608	0.102215	0.731993	0.2949				0.194497	0.781882	0.953507	0.283662		#DIV/0!			0.57253	0.640413	0.236772	0.170892	0.57253	0.640413	0.236772	0.170892					0.700825	0.378546	0.660457	0.381658
		t-tests			Body Mass (g)	Echocardiography - SAX/PSLAX M-Mode																				Transmitral Doppler																				Left Ventricular Outflow Tract (LVOT)
						Volume (μL)		Inner Diameter (mm)		Diastolic Wall Thickness (mm)						SV (μL)	CO (mL/min)	EF (%)	FS (%)	Mass		HR (bpm)		Comments		E Peak (mm/s)	A Peak (mm/s)	E/A Ratio	DT (ms)		IVRT (ms)			IVS		LW		IVS		LW				Comments		LVOT Diameter (mm)	LVOT VTI (mm)	AoV VTI (mm)	AoV Area (mm2)
						diastole	systole	diastole	systole	IVS	LW									LV (mg)	LV/B (mg/g)													A'/E'	E'/A'	A'/E'	E'/A'	A'/E'	E'/A'	A'/E'	E'/A'
	M	Un-WT vs Un-KO			0.814486	0.645455	0.747351	0.678326	0.771859	0.310623	0.897618					0.269938	0.0277934	0.173993	0.164034	0.423873	0.137175	0.732432				0.364347	0.342776	0.0785781	0.0123419		0.484939			#DIV/0!	#DIV/0!	#DIV/0!	0.464778	#DIV/0!	#DIV/0!	#DIV/0!	0.464778					0.414392	0.8293	0.610744	0.774106
		Un-WT vs Un-OLD			0.964126	0.287366	0.171882	0.273013	0.178881	0.0546912	0.0410454					0.517967	0.156508	0.183343	0.233328	0.0423753	0.000655494	0.491652				0.786884	0.155065	0.0235588	0.23117		#DIV/0!			#DIV/0!	#DIV/0!	#DIV/0!	0.493272	#DIV/0!	#DIV/0!	#DIV/0!	0.493272					0.0523652	0.156141	0.0489922	0.320354
		Un-WT vs Tr-WT			0.42801	0.719014	0.71975	0.763676	0.777638	0.816003	0.618144					0.36027	0.0931001	0.223591	0.269044	0.792848	0.00547184	0.527115				0.956016	0.744	0.196757	0.950275		#DIV/0!			#DIV/0!	#DIV/0!	#DIV/0!	0.322422	#DIV/0!	#DIV/0!	#DIV/0!	0.322422					0.231783	0.386529	0.23774	0.276181
		Un-KO vs Tr-KO			0.366177	0.791941	0.494535	0.790215	0.506921	0.220787	0.310629					0.0994991	0.966038	0.142768	0.136834	0.189874	0.0632931	0.0306842				0.12787	0.81743	0.647445	0.671104		#DIV/0!			0.774458	0.442013	0.533683	0.582034	0.774458	0.442013	0.533683	0.582034					0.117546	0.254972	0.526089	0.690341
	F	Un-WT vs Un-KO			0.899656	0.551181	0.678445	0.625252	0.709742	0.591932	0.689377					0.503913	0.727734	0.85196	0.859674	0.565761	0.587644	0.484322				0.287243	0.708963	0.0462846	0.0842136		0.940252			0.0124616	0.00832905	0.0166042	0.706786	0.0124616	0.00676717	0.0166042	0.706786					0.741889	0.570773	0.394502	0.218718
		Un-WT vs Un-OLD			0.0266914	0.0341149	0.0655619	0.0605493	0.225551	0.742391	0.421026					0.0366983	0.0202364	0.557829	0.94436	0.044866	0.767297	0.197734				0.750723	0.256009	0.165344	0.0676102		#DIV/0!			0.0123972	0.008364	0.0166559	0.801347	0.0123972	0.00678153	0.0166559	0.801347					0.185605	0.290235	0.142113	0.614038
		Un-WT vs Tr-WT			0.0157162	0.388684	0.595184	0.420393	0.662647	0.361976	0.827627					0.319659	0.823159	0.860079	0.964658	0.726218	0.0524522	0.433563				0.458312	0.807676	0.308072	0.764817		#DIV/0!			0.0123711	0.00843365	0.0157412	0.0452353	0.0123711	0.00681336	0.0157412	0.0452353					0.835494	0.997406	0.632754	0.660205
		Un-KO vs Tr-KO			0.00749606	0.581322	0.559113	0.646435	0.594135	0.835141	0.828771					0.700195	0.337393	0.627454	0.648692	0.401473	0.900473	0.257229				0.703943	0.88835	0.335443	0.403161		#DIV/0!			0.666596	0.55954	0.819475	0.939431	0.666596	0.55954	0.819475	0.939431					0.609359	0.54268	0.854	0.476108
											LV Di (mm)		LV WT (mm)
Progeria		Test Dates	Mouse #		Body Mass (g)	Echocardiography - SAX/PSLAX M-Mode																				Transmitral Doppler																				Left Ventricular Outflow Tract (LVOT)
						Volume (μL)		Inner Diameter (mm)		LV Wall Thickness, Dia (mm)		LV Wall Thickness, Sys (mm)		LV Strain (-)		SV (μl)	CO (ml/min)	EF (%)	FS (%)	Mass		HR (bpm)	SV/m (μl/g)	Comments		E Peak (mm/s)	A Peak (mm/s)	E/A Ratio	DT (ms)		IVRT (ms)			IVS		IVS		IVS		IVS				Comments		LVOT Diameter (mm)	LVOT VTI (mm)	AoV VTI (mm)	AoV Area (mm2)
						diastole	systole	diastole	systole	Posterior	Anterior (IVS)	Posterior	Anterior	Posterior	Anterior					LV Corr (mg)	LV/B (mg/g)													E' (mm/s)	E/E'	A' (mm/s)	E'/A'	E' (mm/s)	E/E'	A' (mm/s)	E'/A'
Lmna +/+ @ 20 wks	M
		mean			#DIV/0!	#DIV/0!	#DIV/0!	#DIV/0!	#DIV/0!	#DIV/0!	#DIV/0!	#DIV/0!	#DIV/0!			#DIV/0!	#DIV/0!	#DIV/0!	#DIV/0!	#DIV/0!	#DIV/0!	#DIV/0!	#DIV/0!			#DIV/0!	#DIV/0!	#DIV/0!	#DIV/0!		#DIV/0!													0		#DIV/0!	#DIV/0!	#DIV/0!	#DIV/0!
		SD			#DIV/0!	#DIV/0!	#DIV/0!	#DIV/0!	#DIV/0!	#DIV/0!	#DIV/0!	#DIV/0!	#DIV/0!			#DIV/0!	#DIV/0!	#DIV/0!	#DIV/0!	#DIV/0!	#DIV/0!	#DIV/0!	#DIV/0!			#DIV/0!	#DIV/0!	#DIV/0!	#DIV/0!		#DIV/0!															#DIV/0!	#DIV/0!	#DIV/0!	#DIV/0!
		SEM			#DIV/0!	#DIV/0!	#DIV/0!	#DIV/0!	#DIV/0!	#DIV/0!	#DIV/0!	#DIV/0!	#DIV/0!			#DIV/0!	#DIV/0!	#DIV/0!	#DIV/0!	#DIV/0!	#DIV/0!	#DIV/0!	#DIV/0!			#DIV/0!	#DIV/0!	#DIV/0!	#DIV/0!		#DIV/0!															#DIV/0!	#DIV/0!	#DIV/0!	#DIV/0!
	F	2018-12-07	P165		22.5	62.6619	18.909	3.81734	2.33861	0.695312	0.732566	1.1069	0.994416	0.591941	0.357442	43.7528	16.5114	69.8245	38.7367	74.6826	3.31923	377.41	1.94457			619.29	363.689	1.7028	27.7778					12.544	49.3695	14.464	0.867257	12.544	49.3695	14.464	0.867257					1.36637	23.7794	40.7355	0.855963
		2018-12-07	P166		23.6	67.7086	21.3832	3.94406	2.45696	0.691562	0.805986	0.958787	1.27056	0.386408	0.576401	46.3255	20.0472	68.417	37.7041	84.0521	3.56153	432.651	1.96294			595.03	603.008	1.3749	33.8889					17.664	33.686	6.39999	2.76	17.664	33.686	6.39999	2.76					1.35931	27.6442	40.4005	0.99299
		2019-03-08	P1120		21.2	65.2805	28.7887	3.88413	2.77017	0.662392	0.675861	0.964617	0.889109	0.456263	0.31552	36.4918	15.9291	55.8975	28.6791	70.6212	3.33119	436.449	1.72131			552.574	632.557	1.81412	26.9444					15.744	35.0975	7.93599	1.98387	15.744	35.0975	7.93599	1.98387					1.36377	21.2969	31.5875	0.984855
		2013-06-03	572		24.3	35.719	8.05505	3.01483	1.64743	0.995495	0.94955	0.330199			6	27.664	14.4455	78.0756	45.5984	79.7242	3.28083	522.039	1.13843
		2013-06-06	580		26	55.8403	13.707	3.6171	2.00531	1.0491	0.880631	0.290038			7	42.1333	16.5417	76.819	45.0857	117.313	4.51204	391.387	1.62051
		2013-06-07	588		23.6	51.0844	15.987	3.49569	2.14387	0.872973	0.842342	0.249729			8	35.0974	14.5345	69.8128	39.0456	99.1191	4.19996	414.182	1.48718			535.942	349.091	1.53525	33.0556		19.4444			15.8605	33.791	13.9463	1.13725	15.8605	33.791	13.9463	1.13725			-		1.24035	17.6545	44.1585	0.483085
		2013-06-17	602		29.8	49.3219	12.7249	3.44785	1.99731	0.95303	0.95303	0.276413			9	36.597	16.2396	74.1856	42.0627	102.893	3.45279	443.709	1.22809
		2013-06-17	604		29.4	51.5999	16.8852	3.51853	2.23494	0.914394	0.837121	0.25988			11	34.7147	14.9186	67.2554	36.4717	105.466	3.58727	429.811	1.18077			619.64	448.417	1.38184	23.8889		16.6667			30.0802	20.5996	26.5253	1.13402	30.0802	20.5996	26.5253	1.13402			-		1.34019	21.6899	29.9367	1.02207
		2013-06-20	612		22	60.4533	21.2695	3.75931	2.44938	0.940152	1.04318	0.250087			13	39.1838	16.0914	64.8618	34.8583	134.454	6.11155	410.537	1.78108			728.186	399.063	1.82474	27.2222		10.7018			16.4074	44.3815	29.8068	0.550459	16.4074	44.3815	29.8068	0.550459			-		1.25327	13.8816	13.7443	1.24595
		mean			24.7111	55.5189	17.5233	3.61098	2.22711	0.863823	0.857808	0.520738	1.05136	0.478204	6.13882	37.9956	16.1399	69.461	38.6936	96.4806	3.92849	428.686	1.56277	9		608.443	465.971	1.60561	28.7963		15.6043			18.05	36.1542	16.5131	1.40548	18.05	36.1542	16.5131	1.40548			6		1.32054	20.9911	33.4272	0.930818
		SD			3.09736	9.90464	5.99757	0.285924	0.326842	0.144367	0.114297	0.370213	0.196997	0.104509	4.76175	5.60345	1.67941	6.72685	5.25509	21.1657	0.922279	41.1977	0.321277			68.0282	122.831	0.204545	3.87564		4.46712			6.13191	9.97068	9.62908	0.816779	6.13191	9.97068	9.62908	0.816779					0.0579881	4.78118	11.1372	0.253174
		SEM			1.03245	3.30155	1.99919	0.0953081	0.108947	0.0481223	0.0380991	0.123404	0.113736	0.0603381	1.58725	1.86782	0.559803	2.24228	1.7517	7.05524	0.307426	13.7326	0.107092			27.7724	50.1456	0.0835051	1.58222		2.57909			2.50334	4.07051	3.93105	0.333449	2.50334	4.07051	3.93105	0.333449					0.0236735	1.95191	4.54674	0.103358
	t-test					0.0251245	0.20219	0.0282781	0.252655	0.00386981	0.0359677	0.0211897	0.593894	0.328006	0.0241863	0.00810771	0.000419129	0.797675	0.609024	0.000712422	0.352095	0.900482	0.000922059			0.681804	0.258396	0.222081	0.23939					0.00939516	0.000824293	0.189578	0.0252863	0.00939516	0.000824293	0.189578	0.0252863					0.00130029	0.0806515	0.209257	0.0517544
Progeria		Test Dates	Mouse #		Body Mass (g)	Echocardiography - SAX/PSLAX M-Mode																				Transmitral Doppler																				Left Ventricular Outflow Tract (LVOT)
						Volume (μL)		Inner Diameter (mm)		LV Wall Thickness, Dia (mm)		LV Wall Thickness, Sys (mm)		LV Strain (-)		SV (μl)	CO (ml/min)	EF (%)	FS (%)	Mass		HR (bpm)	SV/m (μl/g)	Comments		E Peak (mm/s)	A Peak (mm/s)	E/A Ratio	DT (ms)		IVRT (ms)			IVS		IVS		IVS		IVS				Comments		LVOT Diameter (mm)	LVOT VTI (mm)	AoV VTI (mm)	AoV Area (mm2)
						diastole	systole	diastole	systole	Posterior	Anterior	Posterior	Anterior	Posterior	Anterior					LV Corr (mg)	LV/B (mg/g)													E' (mm/s)	E/E'	A' (mm/s)	E'/A'	E' (mm/s)	E/E'	A' (mm/s)	E'/A'
Lmna G609G/G609G @ 20 wks	M										0.270076
											0.224538
											0.214858
											0.18021
											0.241795
		mean			#DIV/0!	#DIV/0!	#DIV/0!	#DIV/0!	#DIV/0!	#DIV/0!	0.226295	#DIV/0!	#DIV/0!			#DIV/0!	#DIV/0!	#DIV/0!	#DIV/0!	#DIV/0!	#DIV/0!	#DIV/0!	#DIV/0!			#DIV/0!	#DIV/0!	#DIV/0!	#DIV/0!		#DIV/0!													0		#DIV/0!	#DIV/0!	#DIV/0!	#DIV/0!
		SD			#DIV/0!	#DIV/0!	#DIV/0!	#DIV/0!	#DIV/0!	#DIV/0!	0.0332216	#DIV/0!	#DIV/0!			#DIV/0!	#DIV/0!	#DIV/0!	#DIV/0!	#DIV/0!	#DIV/0!	#DIV/0!	#DIV/0!			#DIV/0!	#DIV/0!	#DIV/0!	#DIV/0!		#DIV/0!															#DIV/0!	#DIV/0!	#DIV/0!	#DIV/0!
		SEM			#DIV/0!	#DIV/0!	#DIV/0!	#DIV/0!	#DIV/0!	#DIV/0!	0.0148571	#DIV/0!	#DIV/0!			#DIV/0!	#DIV/0!	#DIV/0!	#DIV/0!	#DIV/0!	#DIV/0!	#DIV/0!	#DIV/0!			#DIV/0!	#DIV/0!	#DIV/0!	#DIV/0!		#DIV/0!															#DIV/0!	#DIV/0!	#DIV/0!	#DIV/0!
	F	2017-12-08	P91		12.7	33.1742	9.5664	2.93213	1.78211	0.667133	0.791896	1.07465	0.965203	0.610844	0.218851	23.6078	12.4676	71.2888	39.2626	50.0999	3.94488	528.469	1.85888			588.747	309.32	1.90336	19.4444					7.67999	76.6599	48.384	0.15873	7.67999	76.6599	48.384	0.15873					1.17508	16.4029	19.0676	0.932939
		2017-12-08	P92		12	37.9898	12.1574	3.10107	1.96186	0.685173	0.696308	1.0494	1.2595	0.53158	0.808825	25.8324	13.9955	67.9577	36.7228	54.4993	4.54161	542.126	2.1527			796.072	619.131	1.28579	30					8.57599	92.8257	21.12	0.406061	8.57599	92.8257	21.12	0.406061					1.14926	15.8382	28.684	0.572791
		2017-12-08	P98		11.9	43.4847	12.435	3.2783	1.98023	0.483114	0.70437	0.967169	1.09899	1.00195	0.560238	31.0496	11.3349	71.4432	39.609	45.3533	3.8112	365.025	2.60921			629.687	350.259	1.79777	26.9444					8.83199	71.2962	27.264	0.323944	8.83199	71.2962	27.264	0.323944					1.04941	15.5793	27.6411	0.487496
		2018-01-04	P110		11.9	53.8632	19.9768	3.58412	2.39074	0.541788	0.645895	0.817254	1.01697	0.508439	0.574519	33.8864	10.9406	62.9148	33.2972	52.766	4.43412	322.876	2.8476			504.417	238.815	2.11217	25.8333					8.83199	57.1124	16.512	0.534884	8.83199	57.1124	16.512	0.534884					1.19589	15.8064	28.1763	0.630117
		2018-01-04	P115		11.6	43.2425	13.2124	3.26748	2.02769	0.660806	0.79006	0.969794	1.23621	0.467593	0.564709	30.0301	10.8213	69.4239	37.9335	59.1066	5.09539	360.563	2.5888			634.948	323.944	1.96006	26.9444					10.368	61.2411	17.792	0.582734	10.368	61.2411	17.792	0.582734					0.973788	19.2509	27.8244	0.515282
		mean			12.02	42.3509	13.4696	3.23262	2.02852	0.607603	0.725706	0.975652	1.11537	0.62408	0.545428	28.8813	11.912	68.6057	37.365	52.365	4.36544	423.812	2.41144	5		630.774	368.294	1.81183	25.8333		#DIV/0!			8.85759	71.8271	26.2144	0.401271	8.85759	71.8271	26.2144	0.401271			5		1.10869	16.5755	26.2787	0.627725
		SD			0.408656	7.71112	3.88707	0.242105	0.222879	0.0897505	0.0636628	0.100542	0.130266	0.217587	0.210635	4.12851	1.33377	3.4902	2.54553	5.11028	0.512991	103.194	0.397829			106.154	146.163	0.315225	3.89385		#DIV/0!			0.968074	14.0816	13.073	0.170007	0.968074	14.0816	13.073	0.170007					0.0940365	1.52604	4.05068	0.179225
		SEM			0.182757	3.44852	1.73835	0.108272	0.0996744	0.0401376	0.0284709	0.0449636	0.0582567	0.097308	0.0941987	1.84632	0.596482	1.56086	1.13839	2.28538	0.229417	46.1496	0.177915			47.4734	65.366	0.140973	1.74138		#DIV/0!			0.432936	6.29746	5.84644	0.0760295	0.432936	6.29746	5.84644	0.0760295					0.0420544	0.682464	1.81152	0.0801519
	t-test				1.15987e-06	0.0251245	0.20219	0.0282781	0.252655	0.00386981	0.0359677	0.0211897	0.593894	0.328006	0.0241863	0.00810771	0.000419129	0.797675	0.609024	0.000712422	0.352095	0.900482	0.000922059			0.681804	0.258396	0.222081	0.23939		#DIV/0!			0.00939516	0.000824293	0.189578	0.0252863	0.00939516	0.000824293	0.189578	0.0252863					0.00130029	0.0806515	0.209257	0.0517544
																CO/BM	LMNA	WT
																	0.981698	0.594464
																	1.16629	0.63622
																	0.952512	0.615869
																	0.919379	0.544952
																	0.932867	0.436887
																		0.507436
																		0.498311
																		0.731427
																Mean	0.990549	0.570696
																SEM	0.0451673	0.0415907
PSLAX		Parasternal long axis
SAX		Short axis
VTI		Velocity time integral
AoV		Aortic valve
LVOT		Left ventricular outflow tract
IVS		Interventricular septum/Septal wall
LW		Lateral wall
IVRT		Isovolumetric relaxation time			Unhealthy	Higher values
IVCT		Isovolumetric contraction time
MPI		Myocardial performance index			Unhealthy	>0.4
ET		Ejection time
MV PHT		Mitral valve pressure half time
Progeria		Test Dates	Mouse #	Temp (Co)	Body Mass (g)	Echocardiography - SAX/(PSLAX) M-Mode																				Transmitral Doppler																				Left Ventricular Outflow Tract (LVOT)
						Volume (μL)		Inner Diameter (mm)		LV Wall Thickness, Dia (mm)		LV Wall Thickness, Sys (mm)		LV Strain (-)		SV (μl)	CO (ml/min)	EF (%)	FS (%)	Mass		HR (bpm)	SV/m (μl/g)	Sample numbers		E Peak (mm/s)	A Peak (mm/s)	E/A Ratio	DT (ms)	ET (ms)	IVRT (ms)	IVCT (ms)	LV MPI	LW		LW		IVS		IVS		Average	MV PHT (ms)	Comments		LVOT Diameter (mm)	LVOT VTI (mm)	AoV VTI (mm)	AoV Area (mm2)
						diastole	systole	diastole	systole	Posterior	Anterior	Posterior	Anterior	Posterior	Anterior					LV Corr (mg)	LV/B (mg/g)													e' (mm/s)	E/e'	A' (mm/s)	e'/A'	e' (mm/s)	E/e'	A' (mm/s)	e'/A'	E/e'
G609G - P168	WT	2020-07-15	160	35.4	23	68.1984	22.2608	3.95496	2.49652	0.888362	0.780469	1.29848	1.31705	0.461656	0.687514	45.9376	20.9159	67.3192	36.863	97.6901	4.2474	471	1.99729			732.185	584.978	1.25165	27.6389					12.5198	58.4823	18.3732	0.681416	18.5358	39.5012	23.9014	0.77551	47.1532	8.01528			1.33969	27.696	48.8494	0.799206
		2021-02-05	476	34.6	23	68.6908	20.8374	3.9661	2.43074	0.688386	0.738589	1.1044	1.29122	0.604332	0.748227	47.8534	21.7624	69.6668	38.7116	79.6413	3.46266	436	2.08058			599.59	420.088	1.4273	29.4444	53.6111	20.8333	15.5556	0.770588	13.2985	45.087	19.4728	0.682927	19.9478	30.058	20.8977	0.954545	36.0696	8.53889			1.37197	30.1037	41.1721	1.08092
		2021-02-05	478	34.8	26.5	61.4454	11.385	3.78645	1.91412	0.762747	0.6824	1.33589	1.13788	0.751414	0.667466	50.0604	22.867	81.4716	49.4482	74.9178	2.82709	463	1.88907			749.251	234.363	3.19697	20.2778	61.9444	13.8889	9.72222	0.515152	12.8236	58.4277	15.5149	0.826531	12.9819	57.7151	20.8977	0.621212	58.0692	5.88056			1.29183	29.9964	49.7933	0.789584
		2021-02-05	475	35.8	28	80.6975	33.2341	4.24718	2.9359	0.684967	0.389275	0.988893	0.958879	0.443709	1.46324	47.4635	18.4896	58.817	30.8742	64.4162	2.30058	368	1.69512			688.001	197.72	3.47967	23.6111	70.2778	18.6111	16.9444	0.723164	12.2687	56.0778	10.4218	1.17722	19.7894	34.7661	22.6391	0.874126	42.9221	6.84722			1.47562	24.8013	48.7488	0.870065
		2021-02-05	466	36.9	26.5	79.6173	39.3908	4.22229	3.14702	0.702234	0.669049	0.953189	1.03611	0.357367	0.548637	40.2265	15.5119	50.5618	25.476	84.0207	3.17059	370	1.51798			612.986	404.013	1.51724	26.1111	71.9444	20.2778	16.9444	0.744444	12.032	50.9463	19.4728	0.617886	18.5229	33.0933	22.3225	0.829787	40.1235	7.57222			1.46208	19.4862	44.1226	0.741476
		2021-02-05	467		26.5	71.7659	28.1016	4.03995	2.74117	0.68141	0.784744	1.04547	0.991764	0.534276	0.263806	43.6643	19.0158	60.7731	32.126	85.0594	3.20979	475	1.64771			614.325	461.614	1.33082	31.3889	70	15.5556	16.6667	0.67052	19.7895	31.0431	18.3646	1.07759	24.6973	24.8742	17.2564	1.43119	27.6184	9.10278			1.19605	16.4092	38.9203	0.473695
		mean		35.5	25.5833	71.7359	25.8683	4.03615	2.61091	0.734684	0.674088	1.12105	1.12215	0.525459	0.729815	45.8676	19.7604	64.7682	35.5832	80.9576	3.20302	430.5	1.80463	5		666.056	383.796	2.03394	26.412	65.5556	17.8333	15.1667	0.684774	13.7887	50.0107	16.9367	0.843927	19.0792	36.668	21.3191	0.914396	41.9927	7.65949	6		1.3562	24.7488	45.2677	0.792491
		SD		0.916515	2.08367	7.34995	9.90142	0.174954	0.433834	0.0811306	0.147604	0.160791	0.153544	0.138826	0.398478	3.48574	2.65381	10.6086	8.24553	11.1177	0.650379	49.5449	0.218715			65.8581	145.059	1.01825	4.02578	7.72302	3.0136	3.09694	0.101702	2.97279	10.6237	3.50519	0.232123	3.75775	11.4034	2.29252	0.276665	10.3068	1.16748			0.105627	5.69464	4.55636	0.196722
		SEM		0.409878	0.850653	3.0006	4.04224	0.0714247	0.177112	0.0331214	0.0602592	0.0656425	0.0626842	0.0566755	0.162678	1.42305	1.08341	4.33094	3.36622	4.53877	0.265516	20.2266	0.0892899			26.8865	59.22	0.415698	1.64352	3.45384	1.34772	1.38499	0.0454825	1.21364	4.3371	1.43099	0.0947638	1.53409	4.65543	0.935917	0.112948	4.20773	0.47662			0.0431221	2.32483	1.86013	0.0803116
	GG
		2021-03-31	562	36.7	14.5	55.0026	24.7363	3.61485	2.60496	0.707865	0.796711	1.00202	1.19231	0.415548	0.496538	30.2663	10.2609	55.0001	27.93	73.2703	5.05312	320	2.08733			521.627	397.047	1.31377	33.8889	79.1667	18.6111	15.2778	0.502058	8.54905	61.0158	17.0981	0.5	4.43284	117.673	10.2905	0.430769	80.3623	9.82778			0.821605	21.1256	47.8459	0.23409
		2021-03-31	570	37.2	16	54.2328	12.1267	3.59335	1.96035	0.763722	0.725969	1.24554	1.11819	0.630877	0.540275	42.1061	15.7864	77.6095	45.4312	71.5822	4.47389	522	2.63163			440.717	275.951	1.59709	31.9444					3.64126	121.034	14.2484	0.255556	8.70736	50.6143	16.6231	0.523809	71.3792	9.26389
		2021-03-31	568	35.8	12	44.7805	10.2175	3.3196	1.83394	0.623631	0.554853	0.95628	0.935288	0.533407	0.68565	34.563	11.5119	77.1794	44.7528	45.8496	3.8208	328	2.88025			895.153	492.656	1.81699	40.2778	95	13.0556	5.55556	0.326829	9.28727	96.3849	14.9863	0.619718	10.5537	84.8187	14.142	0.746269	90.2327	11.6806			0.932696	16.0787	34.0925	0.322228
		2021-03-31	566	34.4	11	31.9127	4.37612	2.88677	1.31798	0.686989	0.662603	1.21737	1.27268	0.772031	0.920732	27.5365	12.9867	86.3235	54.3557	43.834	3.98491	450	2.50332			621.291	344.001	1.80608	20.2778	47.193	17.5439	12.807	0.673152	9.49835	65.4104	17.2817	0.549618	5.67262	109.524	8.31105	0.68254	81.9052	5.88056			0.892618	21.3031	33.3976	0.399161
		mean		36.025	13.375	46.4821	12.8641	3.35364	1.92931	0.695552	0.685034	1.1053	1.12962	0.587966	0.660799	33.618	12.6365	74.0281	43.1174	58.634	4.33318	405	2.52563	4		619.697	377.414	1.63348	31.5972	73.7865	16.4035	11.2135	0.50068	7.74398	85.9613	15.9036	0.481223	7.34163	90.6577	12.3417	0.595847	80.9698	9.16319	4		0.882306	19.5025	38.4454	0.318493
		SD		1.22848	2.28674	10.7678	8.57406	0.339026	0.52924	0.057864	0.102628	0.147309	0.144098	0.151025	0.191216	6.35502	2.37718	13.3666	11.03	15.962	0.554357	98.0952	0.331458			197.931	91.4284	0.235944	8.34374	24.3534	2.94811	5.05322	0.173166	2.76526	28.1861	1.51736	0.158258	2.7946	30.1295	3.74278	0.144433	7.72496	2.41969			0.0562588	2.96637	8.14852	0.0825992
		SEM		0.614241	1.14337	5.3839	4.28703	0.169513	0.26462	0.028932	0.0513141	0.0736543	0.0720488	0.0755127	0.095608	3.17751	1.18859	6.6833	5.51501	7.98099	0.277178	49.0476	0.165729			98.9655	45.7142	0.117972	4.17187	14.0604	1.70209	2.91748	0.0999772	1.38263	14.0931	0.758678	0.0791292	1.3973	15.0648	1.87139	0.0722163	3.86248	1.20984			0.032481	1.71264	4.70455	0.0476887
	GG +Lona (148d)	2021-01-27	469		12	45.0278	14.8801	3.3239	2.12341	0.717455	0.812087	1.02481	1.04621	0.428391	0.2883	30.1478	12.8955	66.9952	36.1258	65.3752	5.44793	416	2.51232			613.724	427.217	1.43656	19.4444	57.2222	13.6111	10.8333	0.458333	10.5996	57.9006	17.7615	0.596774	9.4537	64.9189	12.032	0.785714	61.2093	5.63889			0.970894	11.032	36.9127	0.221265
		2021-01-27	448		11.5	40.4473	9.82998	3.18187	1.80269	0.762486	0.829969	1.23216	1.1137	0.615977	0.341853	30.6173	12.0445	75.6943	43.3446	64.6734	5.62377	403	2.66237			421.19	186.549	2.2578	23.8889	77.193	14.386	8.59649	0.381924	20.434	20.6122	16.8055	1.21591	15.8507	26.5724	11.8403	1.33871	23.2159	6.92778			0.889063	25.3228	33.9382	0.463211
		2021-01-27	449		10	39.5718	9.93934	3.15346	1.81299	0.606435	0.772636	0.966355	1.08759	0.593501	0.407641	29.6325	27.318	74.905	42.516	50.2825	5.02825	316	2.96325			437.091	225.721	1.93643	29.4444	87.5	17.5	12.2222	0.486364	27.7882	15.7294	19.4804	1.42647	18.3345	23.8399	11.7455	1.56098	18.9534	8.53889			0.963207	30.1476	53.3883	0.411469
		2021-01-27	431		13	42.009	9.10704	3.23168	1.74825	1.03445	0.744284	1.40724	1.34397	0.36038	0.805715	32.9019	13.3254	78.4577	45.9572	77.5216	5.9632	490	2.53092			819.789	422.257	1.94145	27.5	93.0556	16.6667	7.5	0.406542	13.1779	62.2094	18.6209	0.707692	12.6049	65.0371	8.59428	1.46667	63.5918	7.975			1.11485	19.7181	28.8236	0.667789
		2021-01-27	446		11.5	52.4725	15.166	3.54424	2.14296	0.659514	0.78353	1.00331	1.02201	0.521281	0.30437	37.3064	35.6823	71.0577	39.5222	66.9636	5.82292	392	3.24404			552.182	246.761	2.23772	33.6111	64.7222	16.9444	15.5556	0.704819	9.16724	60.2343	22.0587	0.415584	10.3131	53.5416	13.1779	0.782609	56.6911	9.74722			0.772657	32.1381	27.894	0.540223
		2021-01-27	459		15	45.9272	9.39211	3.3532	1.77437	0.737022	0.726944	1.16675	1.31231	0.583057	0.805241	36.5351	36.2859	79.4144	47.027	62.3974	4.15983	540	2.43568			553.636	289.423	1.9129	19.1667					19.1939	28.8444	21.7722	0.881579	10.8861	50.8572	12.032	0.904762	36.8109	5.55833			0.901184	12.9116	42.0853	0.195689
		mean			12.1667	44.2426	11.3858	3.29806	1.90078	0.752893	0.778242	1.13344	1.1543	0.517098	0.492187	32.8568	22.9253	74.4207	42.4155	64.5356	5.34098	426.167	2.72476	6		566.269	299.655	1.95381	25.5093	75.9386	15.8216	10.9415	0.487596	16.7268	40.9217	19.4165	0.874002	12.9072	47.4612	11.5703	1.13991	43.4121	7.39769	6		0.935309	21.8784	37.1737	0.416608
		SD			1.69312	4.74121	2.8348	0.143617	0.181542	0.149025	0.039154	0.168805	0.138723	0.102384	0.246128	3.34908	11.5904	4.68059	4.06484	8.75191	0.663891	78.7107	0.315181			144.649	102.435	0.297552	5.73977	15.0361	1.71313	3.1735	0.128238	7.06354	21.4821	2.13183	0.383885	3.49146	18.2016	1.54732	0.355528	19.7483	1.66453			0.11317	8.81159	9.5227	0.183049
		SEM			0.691215	1.93559	1.1573	0.0586313	0.0741141	0.0608391	0.0159846	0.0689144	0.0566336	0.041798	0.100482	1.36726	4.73176	1.91084	1.65946	3.57295	0.271032	32.1335	0.128672			59.0528	41.8191	0.121475	2.34325	6.72436	0.766135	1.41923	0.0573498	2.88368	8.77005	0.870314	0.156721	1.42538	7.43079	0.631689	0.145144	8.06222	0.679543			0.0462016	3.59732	3.88763	0.0747295
	GG +Lona (148d) +Rapa (68d)	2021-04-23	681		13	47.1294	14.2939	3.39024	2.09061	0.623456	0.541481	0.876911	0.86071	0.406532	0.589548	32.8356	10.8519	69.7209	38.3504	46.8288	3.60221	420	2.52581			640.848	95.645	6.70028	15.5556	98.6111	8.88889	24.4444	0.655738	14.8807	43.0656	7.07099	2.10448	8.86513	72.2887	8.65405	1.02439	53.9756	4.51111			0.991454	13.4167	57.0675	0.181507
		2021-04-23	680		12.5	50.0782	13.8746	3.47636	2.06653	0.615706	0.573853	1.03575	0.997404	0.682215	0.738083	36.2035	15.533	72.3575	40.5759	50.1641	4.01312	380	2.89628			556.188	284.256	1.95664	23.8889	52.7778	14.4444	18.0556	0.471774	17.5456	31.6996	16.3583	1.07258	9.10259	61.1021	8.97067	1.01471	41.7431	6.92778			0.929702	32.5854	49.7466	0.444671
		2021-04-23	667		11.5	25.3123	9.48215	2.62886	1.77885	0.73155	0.5523	0.85442	0.962105	0.167958	0.741997	15.8302	7.55893	62.5867	32.3487	35.153	3.05678	487	1.37654			311.315	228.262	1.36385	23.3333					7.07099	44.0271	7.49314	0.943662	5.59347	55.6569	9.0762	0.616279	49.1636	6.76667
		2021-04-23	671		11	44.6986	19.5497	3.31572	2.37051	0.747369	0.676947	0.904504	0.914676	0.210251	0.351178	25.1489	5.35896	56.1438	28.4735	58.9738	5.36125	358	2.28626			322.835	281.309	1.14762	29.1667	170.556	24.4444	7.22222	0.346505	6.01599	53.6628	10.4488	0.575758	4.74947	67.9729	9.65726	0.491803	59.9761	8.45833			0.882598	39.6419	79.6754	0.304402
		mean			12	41.8046	14.3001	3.2028	2.07663	0.67952	0.586145	0.917896	0.933724	0.366739	0.605201	27.5045	9.8257	65.2022	34.9371	47.7799	4.00834	411.25	2.27122	4		457.797	222.368	2.7921	22.9861	107.315	15.9259	16.5741	0.491339	11.3783	43.1138	10.3428	1.17412	7.07766	64.2551	9.08954	0.786795	51.2146	6.66597	4		0.934585	28.548	62.1631	0.310193
		SD			0.912871	11.2127	4.12118	0.388212	0.241755	0.0695845	0.062012	0.081195	0.0593141	0.2346	0.183615	9.05413	4.42404	7.31466	5.53549	9.85444	0.983326	56.6473	0.647097			166.193	88.3131	2.6278	5.60797	59.3693	7.88289	8.70617	0.155542	5.70407	8.98892	4.28261	0.654987	2.23	7.3537	0.418832	0.273551	7.70938	1.62631			0.054592	13.5708	15.6015	0.131677
		SEM			0.456435	5.60636	2.06059	0.194106	0.120878	0.0347922	0.031006	0.0405975	0.0296571	0.1173	0.0918075	4.52707	2.21202	3.65733	2.76775	4.92722	0.491663	28.3237	0.323548			83.0963	44.1565	1.3139	2.80399	34.2769	4.55119	5.02651	0.0898023	2.85204	4.49446	2.14131	0.327494	1.115	3.67685	0.209416	0.136776	3.85469	0.813156			0.0315187	7.83508	9.00755	0.076024
	t-test Wt>GG				0.000125223	0.00990787	0.06171	0.0199118	0.0792382	0.399889	0.893448	0.877646	0.939906	0.531921	0.724578	0.0224055	0.00293141	0.293142	0.294103	0.059842	0.0204838	0.655661	0.0134734			0.678181	0.934109	0.391141	0.312692	0.621455	0.54287	0.310195	0.197006	0.013564	0.0789036	0.543196	0.0188823	0.000524577	0.0317373	0.00975593	0.0457422	0.000153518	0.312691			5.91773e-05	0.112988	0.281194	0.00145279
	t-test GG>GG+LONA				0.405891	0.716488	0.758452	0.773186	0.923015	0.423123	0.166022	0.788102	0.796178	0.450074	0.260193	0.836297	0.0826765	0.958038	0.909569	0.534902	0.0337311	0.731527	0.377417			0.66195	0.249044	0.0970858	0.2603	0.899084	0.776755	0.938523	0.916089	0.026379	0.0396644	0.0162601	0.0597717	0.0249297	0.0554523	0.717608	0.0119965	0.00409624	0.2603			0.379538	0.570638	0.843536	0.304972
	t-test GG>GG+LONA+RAPA				0.327597	0.569386	0.77673	0.580029	0.63802	0.735632	0.160772	0.0801379	0.0659417	0.172255	0.689518	0.315993	0.318023	0.302697	0.249297	0.299487	0.59121	0.916596	0.518727			0.2582	0.0505583	0.443517	0.144558	0.43997	0.928909	0.420297	0.947959	0.310829	0.0502058	0.0749885	0.122381	0.887677	0.177408	0.180374	0.276902	0.00158323	0.144558			0.312418	0.367696	0.101331	0.931555
		2021-02-18	540	37.3	13	49.032	20.031	3.44583	2.39146	0.792594	0.758628	1.06719	1.07192	0.346459	0.412977	29.001	9.70242	59.1714	30.604	70.645	5.43423	440	2.23085			372.667	293.633	1.26916	16.9444	81.6667	15	13.3333	0.470046	11.0821	33.6279	14.2484	0.777778	10.2905	36.2146	9.34063	1.10169	34.8733	4.91389			0.998256	19.4263	61.1383	0.248686
[truncated: 4 more columns]

## Sheet: PW Doppler
Un-WT		Test Dates	Mouse #	ATA						SAA						IAA						CCA							Global Pulse Transit Time
				Blood Velocity (cm/s)		∆t (ms)	HR (bpm)	Data File	Comments	Blood Velocity (cm/s)		∆t (ms)	HR (bpm)	Data File	Comments	Blood Velocity (cm/s)		∆t (ms)	HR (bpm)	Data File	Comments	Blood Velocity (cm/s)		∆t (ms)	HR (bpm)	Data File	Comments		Mean HR (bpm)	PTT (ms)	Comments
				diastole	systole					diastole	systole					diastole	systole					diastole	systole
Fbln5 +/+ @ 20-22 wks (Untreated)	M	2013-06-14	577	-2.21283	128.274	10.3729	341.062	PW_prox (N = 16)	-	-	-	-	-	-	-	1.08693	20.624	28.3246	392.65	PW_dist (N = 20)	-	-	-	-	-	-	-		366.856	20.6725	-
		2013-06-07	587	0.635413	139.179	12.348	368.158	PW_prox (N = 19)	-	-	-	-	-	-	-	6.09235	42.8938	21.152	365.276	PW_dist3 (N = 29)	-	-	-	-	-	-	-		366.717	8.67237	-
		2013-06-10	592	-1.93945	108.639	9.78459	449.353	PW_prox (N = 17)	-	-	-	-	-	-	-	1.22426	17.8375	24.2713	448.567	PW_dist (N = 30)	-	-	-	-	-	-	-		448.96	14.4569	-
		2013-06-14	593	-6.22003	73.4655	12.7872	448	PW_prox (N = 19)	-	-	-	-	-	-	-	6.53606	25.3733	21.526	420.412	PW_dist (N = 34)	-	2.21146	33.3128	15.2885	418.944	RCCA_PW (N = 18)	-		434.206	7.64876	-
		2013-06-17	600	-6.19991	84.1583	12.0236	499.718	PW_prox (N = 39)	-	-	-	-	-	-	-	4.84581	38.8545	21.3404	522.565	PW_dist (N = 23)	-	6.55279	36.0426	13.0422	535.92	LCCA_PW (N = 25)	-		511.142	10.0624	-
		mean		-3.18736	106.743	11.4633	421.258	5		#DIV/0!	#DIV/0!	#DIV/0!	#DIV/0!	0		3.95708	29.1166	23.3229	429.894	5		4.38212	34.6777	14.1653	477.432	2			425.576	12.3026
		SD		2.9746	28.0032	1.30923	65.0218			#DIV/0!	#DIV/0!	#DIV/0!	#DIV/0!			2.63185	11.1579	3.07363	60.3928			3.06979	1.93024	1.58838	82.7142				60.9409	5.35145
		SEM		1.33028	12.5234	0.585506	29.0787			#DIV/0!	#DIV/0!	#DIV/0!	#DIV/0!			1.177	4.98996	1.37457	27.0085			2.17067	1.36489	1.12315	58.4878				27.2536	2.39324
	F	2013-06-03	572	0.714286	113.181	11.8177	475.167	PW_prox (N = 30)	-	-	-	-	-	-	-	2.70394	37.4147	24.7013	432.8	PW_dist (N = 25)	-	-	-	-	-	-	-		453.983	11.1796	-
		2013-06-06	580	-1.2612	144.161	10.1793	384.905	PW_prox (N = 21)	-	-	-	-	-	-	-	1.12191	19.2911	22.8752	425.029	PW_dist (N = 34)	-	-	-	-	-	-	-		404.967	14.3335	-
		2013-06-07	588	-4.47309	77.0953	9.35039	371	PW_prox (N = 20)	-	-	-	-	-	-	-	2.29108	50.9511	19.5743	401.219	PW_dist (N = 32)	Uncertain Location	15.3799	79.6647	14.5963	348.143	RCCA_PW (N = 14)	-		386.109	11.3558	-
		2013-06-17	602	1.18595	98.6132	11.3897	485.304	PW_prox (N = 23)	-	-	-	-	-	-	-	4.06881	32.616	19.2646	413.375	PW_dist (N = 16)	-	1.9278	17.4535	13.7549	477.913	RCCA_PW (N = 23)	-		449.34	5.42143	-
		2013-06-17	603	1.1275	82.9039	15.3697	366.556	PW_prox (N = 18)	-	-	-	-	-	-	-	2.58869	18.2629	24.01	354.588	PW_dist (N = 17)	-	5.6268	51.2145	15.7887	462.05	RCCA_PW (N = 20)	-		360.572	7.98678	-
		2013-06-17	604	0.654547	150.201	10.2952	427.75	PW_prox (N = 20)	-	-	-	-	-	-	-	8.13633	34.9486	20.0246	483.708	PW_dist (N = 24)	-	0.541095	21.6623	7.59504	481.286	CCA_PW (N = 14)	-		455.729	11.5909	-
		2013-06-24	606	0.485775	86.4812	13.2052	405.636	PW_dist (N = 22)	Bad PW at Root!	-	-	-	-	-	-	7.53217	34.0585	21.6599	474.692	PW_dist2 (N = 13)	-	3.19228	42.6463	11.5319	485.25	RCCA_PW (N = 16)	-		440.164	11.1896	-
		2013-06-20	612	-5.44357	98.7628	5.21668	556.885	PW_prox (N = 26)	-	-	-	-	-	-	-	9.92543	57.3673	14.5294	566.632	PW_dist (N = 38)	-	7.46119	85.8379	9.79269	563.88	RCCA_PW (N = 25)	-		561.758	9.48402	-
		mean		-0.876225	106.425	10.853	434.15	8		#DIV/0!	#DIV/0!	#DIV/0!	#DIV/0!	0		4.79604	35.6138	20.8299	444.005	8		5.68818	49.7465	12.1766	469.754	6			439.078	10.3177
		SD		2.64418	27.5601	2.97473	66.7607			#DIV/0!	#DIV/0!	#DIV/0!	#DIV/0!			3.26249	13.5806	3.25894	64.1485			5.36544	28.5721	3.11391	69.4953				60.6969	2.68408
		SEM		0.934858	9.74395	1.05173	23.6035			#DIV/0!	#DIV/0!	#DIV/0!	#DIV/0!			1.15346	4.80145	1.15221	22.6799			2.19043	11.6645	1.27125	28.3713				21.4596	0.948966
	t-test			0.193751	0.984461	0.622848	0.738743			#DIV/0!	#DIV/0!	#DIV/0!	#DIV/0!			0.621661	0.370322	0.197814	0.69834			0.697486	0.254336	0.307365	0.919742				0.706558	0.473784
Un-KO		Test Dates	Mouse #	ATA						SAA						IAA						CCA							Global Pulse Transit Time
				Blood Velocity (cm/s)		∆t (ms)	HR (bpm)	Data File	Comments	Blood Velocity (cm/s)		∆t (ms)	HR (bpm)	Data File	Comments	Blood Velocity (cm/s)		∆t (ms)	HR (bpm)	Data File	Comments	Blood Velocity (cm/s)		∆t (ms)	HR (bpm)	Data File	Comments		Mean HR (bpm)	PTT (ms)	Comments
				diastole	systole					diastole	systole					diastole	systole					diastole	systole
Fbln5 -/- @ 20-22 wks (Untreated)	M	2013-06-10	583	0.693657	118.801	15.2522	428.545	PW_prox3 (N = 33)	-	-	-	-	-	-	-	1.94997	27.9655	23.9511	437.522	PW_dist (N = 23)	-	1.34831	48.1187	13.7851	361.944	RCCA_PW (N = 18)	-		433.034	9.10526	-
		2013-06-10	591	-4.53997	112.421	10.5674	320.208	PW_prox (N = 24)	-	-	-	-	-	-	-	1.87991	31.1458	22.5769	331.429	PW_dist (N = 14)	-	-	-	-	-	-	-		325.818	12.5802	-
		2013-06-14	594	-10.3604	96.7195	17.033	341.429	PW_prox (N = 21)	-	-	-	-	-	-	-	2.33739	37.6681	21.4202	334.84	PW_dist (N = 25)	-	-3.5092	9.57883	14.0407	353.125	RCCA_PW (N = 16)	Noisy Images		338.134	4.01261	-
		2013-06-20	613	0.67925	145.808	10.2505	503.462	PW_prox (N = 39)	-	-	-	-	-	-	-	8.85284	46.1719	15.9406	481.118	PW_dist (N = 17)	-	8.718	57.6357	13.3242	479.9	RCCA_PW (N = 20)	-		492.29	5.09576	-
		2013-06-24	615	0.331162	116.554	7.22576	510.571	PW_prox (N = 21)	-	-	-	-	-	-	-	11.7887	62.0693	13.2703	594.857	PW_dist (N = 28)	-	4.26148	37.8176	4.72921	586.786	RCCA_PW (N = 28)	-		552.714	7.60726	-
		2013-06-24	619	0.634702	94.4549	8.68831	450.643	PW_dist (N = 14)	Bad PW at Root!	-	-	-	-	-	-	2.50771	20.8007	23.9142	374.471	PW_dist (N = 17)	-	-	-	-	-	-	-		412.557	12.2161	-
		mean		-2.09361	114.126	11.5029	425.81	6		#DIV/0!	#DIV/0!	#DIV/0!	#DIV/0!	0		4.88609	37.6369	20.1789	425.706	6		2.70465	38.2877	11.4698	445.439	4			425.758	8.43621
		SD		4.54105	18.5706	3.8288	80.1378			#DIV/0!	#DIV/0!	#DIV/0!	#DIV/0!			4.31722	14.7575	4.49814	101.58			5.13276	20.7799	4.5035	110.544				87.6783	3.55871
		SEM		1.85388	7.58142	1.5631	32.7161			#DIV/0!	#DIV/0!	#DIV/0!	#DIV/0!			1.7625	6.02473	1.83636	41.4697			2.56638	10.39	2.25175	55.2718				35.7945	1.45284
	F	2013-06-03	573	0.53504	91.15	9.87866	394.233	PW_prox (N = 30)	-	-	-	-	-	-	-	3.68707	22.7494	20.5753	447.148	PW_dist (N = 27)	-	-	-	-	-	-	-		420.691	12.6119	-
		2013-06-07	589	2.08627	149.492	4.12493	477.483	PW_prox (N = 29)	-	-	-	-	-	-	-	4.29228	26.6131	16.0638	462.95	PW_dist (N = 20)	-	0.697674	96.6236	7.52215	487.862	RCCA_PW (N = 29)	-		470.216	11.6269	-
		2013-06-07	609	-1.66209	131.802	13.2939	392	PW_prox (N = 26)	-	-	-	-	-	-	-	6.11488	38.2025	20.9676	400.148	PW_dist (N = 27)	-	-	-	-	-	-	-		396.074	8.02611	-
		2013-06-24	620	0.611094	101.604	4.31817	446.867	PW_prox (N = 15)	-	-	-	-	-	-	-	-	-	-	-	-	Dying Mouse	-	-	-	-	-	Dying Mouse		446.867	-	-
		2013-12-06	773	-3.11747	85.5387	9.49028	366.107	PW_prox (N = 28)	-	-	-	-	-	-	-	5.62268	41.2621	18.6865	460.964	PW_dist (N = 28)	-	4.85393	51.9528	6.71463	520.52	RCCA_PW (N = 25)	-		413.536	12.4278	-
		2015-04-30	416	-2.16993	135.264	9.89817	383.55	PW_prox2 (N = 20)	-	9.03319	75.1815	11.68	474.609	SAA_PW (N = 23)	-	0.840841	48.2233	16.6681	454.389	PW_dist (N = 18)	-	9.61201	70.934	8.11669	442.625	RCCA_PW (N = 32)	-		418.969	9.01586	-
		2015-05-14	451	0.837849	126.498	8.69324	399.824	PW_prox (N = 17)	-	-	-	-	-	-	-	13.605	86.9131	19.6615	381.87	PW_dist (N = 23)	GREAT Wave!	9.34976	74.2781	11.2421	437.87	RCCA_PW (N = 23)	-		390.847	10.317	-
		mean		-0.411319	117.336	8.52819	408.58	7		9.03319	75.1815	11.68	474.609	1		5.6938	43.9939	18.7705	434.578	6		6.12834	73.4471	8.39889	472.219	4			422.457	10.6709
		SD		1.90262	24.4707	3.27816	39.1606			#DIV/0!	#DIV/0!	#DIV/0!	#DIV/0!			4.2968	23.0407	2.03132	34.6851			4.22807	18.3135	1.98064	39.2996				27.8895	1.87762
		SEM		0.719121	9.24907	1.23903	14.8013			#DIV/0!	#DIV/0!	#DIV/0!	#DIV/0!			1.75416	9.40632	0.829283	14.1601			2.11404	9.15677	0.99032	19.6498				10.5412	0.766537
	t-test			0.427604	0.793456	0.166799	0.64597			#DIV/0!	#DIV/0!	#DIV/0!	#DIV/0!			0.752013	0.58399	0.507233	0.846084			0.34425	0.0447638	0.278149	0.673213				0.932454	0.212748
Un-OLD		Test Dates	Mouse #	ATA						SAA						IAA						CCA							Global Pulse Transit Time
				Blood Velocity (cm/s)		∆t (ms)	HR (bpm)	Data File	Comments	Blood Velocity (cm/s)		∆t (ms)	HR (bpm)	Data File	Comments	Blood Velocity (cm/s)		∆t (ms)	HR (bpm)	Data File	Comments	Blood Velocity (cm/s)		∆t (ms)	HR (bpm)	Data File	Comments		Mean HR (bpm)	PTT (ms)	Comments
				diastole	systole					diastole	systole					diastole	systole					diastole	systole
Fbln5 +/+ @ 100-110 wks (Untreated)	M	2015-05-14	722	0.160276	146.475	9.52068	499.692	PW_prox (N = 13)	-	12.6687	87.0545	15.2501	621	SAA_PW (N = 24)	Good Images	5.46685	68.7855	16.5782	552.375	PW_dist (N = 24)	-	13.5215	77.7967	7.54891	545.038	LCCA_PW (N = 26)	-		526.034	8.36448	-
		2015-05-21	733	1.02564	136.171	14.1677	470.083	PW_prox (N = 12)	Irregular ECG	-	-	-	-	-	-	4.16483	51.3512	19.2655	380.25	PW_dist (N = 20)	Irregular ECG	6.25946	48.261	12.1117	449.8	LCCA_PW (N = 25)	Irregular ECG		425.167	1.56577	-
		2015-05-14	736	2.00629	142.591	6.90332	431.438	PW_prox (N = 16)	-	0.313209	35.9674	28.5721	511.444	SAA_PW (N = 9)	Bad ECG	-	-	-	-	-	Dead Mouse	3.72772	85.5276	11.5151	452.133	LCCA_PW (N = 15)	High velocity		431.438	-	-
		2015-04-30	740	2.6041	200.092	11.8374	471.174	PW_prox (N = 23)	High velocity	0.674157	70.4148	8.06407	520.182	SAA_PW (N = 11)	-	2.78433	37.3217	16.1056	466.55	PW_dist (N = 20)	-	0.719528	50.34	5.26084	491.429	LCCA_PW (N = 14)	-		468.862	4.13037	-
		2015-04-09	742	-10.3723	142.655	10.6879	454.914	PW_prox (N = 35)	-	-	-	-	-	-	-	2.64965	67.0347	23.7422	451.735	PW_dist (N = 34)	GREAT Wave!	1.55681	27.1923	7.52929	462	LCCA_PW (N = 28)	-		453.325	12.9336	-
		2015-05-21	747	-3.06351	121.4	10.0126	447.19	PW_prox (N = 21)	-	15.582	78.7024	17.6283	483.2	SAA_PW (N = 25)	GREAT Wave!	3.57721	33.0046	20.47	481.318	PW_dist (N = 22)	Good Images	4.32875	45.223	12.208	502.5	LCCA_PW (N = 24)	Good Images		464.254	11.5778	-
		mean		-1.27325	148.23	10.5216	462.415	6		7.30951	68.0348	17.3786	533.957	4		3.72857	51.4996	19.2323	466.446	5		5.01897	55.7235	9.3623	483.817	6			461.513	7.7144
		SD		4.88113	26.9105	2.4251	23.549			7.96096	22.4316	8.498	60.1369			1.15006	16.4563	3.11015	61.7478			4.61407	21.8379	2.95844	36.8566				36.1028	4.82802
		SEM		1.99271	10.9861	0.990044	9.61383			3.98048	11.2158	4.249	30.0684			0.514321	7.35949	1.3909	27.6144			1.88369	8.91529	1.20778	15.0467				14.7389	2.15916
	F	2014-09-16	465	1.01266	199.9	7.5496	439.833	PW_prox (N = 18)	High velocity	7.22743	37.3595	16.3072	435	SAA_PW (N = 9)	Noisy Images	2.52025	42.1658	17.8654	441.667	PW_prox (N = 21)	Proximal velocity	1.01266	58.7108	9.943	452	LCCA_PW (N = 18)	-		440.75	10.3686	-
		2014-11-18	484	-2.22356	160.494	9.11283	422.292	PW_prox (N = 24)	High velocity	5.63992	29.6368	15.9467	452.75	SAA_PW (N = 16)	Noisy Images	3.49366	56.0268	19.3348	446.889	PW_dist (N = 27)	Good Images	4.80832	68.1977	11.8153	440.826	LCCA_PW (N = 23)	Good Images		434.59	11.027	-
		2014-11-18	486	1.71779	185.907	9.58321	451.643	PW_prox (N = 28)	High velocity	9.93076	66.915	16.279	480.261	SAA_PW (N = 23)	Good Images	9.63848	146.782	17.9075	472.5	PW_dist (N = 14)	Very high velocity	4.81266	52.184	10.6536	448.72	LCCA_PW (N = 25)	Good Images		462.071	8.94476	-
		2014-12-04	492	0	277.723	11.963	543.966	PW_prox (N = 29)	Very high velocity	-	-	-	-	-	Noisy Images	5.67618	87.9617	20.5719	480.323	PW_dist (N = 31)	Good Images	4.4667	63.9282	14.434	516.412	LCCA_PW (N = 17)	Good Images		512.144	6.58733	-
		2014-09-16	495	-5.61609	111.832	6.29851	517.667	PW_prox (N = 24)	-	5.49071	34.3475	14.3474	522.611	SAA_PW (N = 18)	Noisy Images	5.23019	38.2864	17.6526	486.81	PW_dist (N = 21)	GREAT Wave!	0.689655	52.3471	7.20233	528	LCCA_PW (N = 32)	-		502.238	10.6183	-
		2014-12-11	501	-1.02833	85.116	11.1047	390.588	PW_prox (N = 17)	Noisy Images	-	-	-	-	-	-	-2.00318	25.1467	20.2318	431.462	PW_dist (N = 26)	-	8.04864	94.6391	13.5467	379.647	LCCA_PW (N = 17)	High velocity		411.025	10.6852	-
		2014-12-04	507	6.67001	63.1922	8.1435	445.75	PW_prox (N = 24)	Noisy Images	7.94549	39.4516	13.2535	496.483	SAA_PW (N = 29)	Noisy Images	7.63821	34.9	16.8212	508.158	PW_dist (N = 19)	-	8.34406	50.8196	11.1384	422.2	LCCA_PW (N = 20)	Good Images		476.954	10.3109	-
		2014-12-11	523	-15.1917	188.807	9.50756	425.469	PW_prox (N = 32)	High velocity	6.15979	54.6207	16.2237	494.28	SAA_PW (N = 25)	Noisy Images	2.05195	50.5693	18.3959	437.043	PW_dist (N = 23)	GREAT Wave!	7.32091	80.095	8.86074	425.1	LCCA_PW (N = 20)	GREAT Wave!		431.256	9.26282	-
		2014-10-21	524	-1.04094	152.101	12.5863	427.083	PW_prox (N = 12)	Dying Mouse	-	-	-	-	-	Dead Mouse	-	-	-	-	-	Dead Mouse	0.546081	62.718	8.50075	426.4	RCCA_PW (N = 15)	Dying Mouse		427.083	-	-
		2015-04-30	732	0.530138	187.002	9.54829	501.6	PW_prox (N = 15)	High velocity	-	-	-	-	-	-	5.69459	65.8282	22.7174	507.174	PW_dist (N = 23)	GREAT Wave!	17.5415	68.4994	11.5152	529.276	LCCA_PW (N = 29)	Good Images		504.387	13.3474	-
		mean		-1.517	161.207	9.53975	456.589	10		7.06568	43.7218	15.3929	480.231	6		4.43781	60.8518	19.0554	468.003	9		5.75912	65.2139	10.761	456.858	10			460.25	10.128
		SD		5.72661	62.3863	1.94947	48.5172			1.69369	14.1541	1.28748	31.8076			3.40547	37.2146	1.84731	29.8028			5.07786	13.7424	2.23951	50.8789				36.6498	1.82002
		SEM		1.81091	19.7283	0.616478	15.3425			0.691445	5.77837	0.525609	12.9854			1.13516	12.4049	0.615769	9.93425			1.60576	4.34574	0.708194	16.0893				11.5897	0.606674
	t-test			0.929353	0.575192	0.42195	0.752481			0.955468	0.116799	0.673494	0.173913			0.581014	0.529228	0.911461	0.959719			0.770245	0.368737	0.345465	0.24226				0.947515	0.334565
Tr-WT		Test Dates	Mouse #	ATA						SAA						IAA						CCA							Global Pulse Transit Time
				Blood Velocity (cm/s)		∆t (ms)	HR (bpm)	Data File	Comments	Blood Velocity (cm/s)		∆t (ms)	HR (bpm)	Data File	Comments	Blood Velocity (cm/s)		∆t (ms)	HR (bpm)	Data File	Comments	Blood Velocity (cm/s)		∆t (ms)	HR (bpm)	Data File	Comments		Mean HR (bpm)	PTT (ms)	Comments
				diastole	systole					diastole	systole					diastole	systole					diastole	systole
Fbln5 +/+ @ 20-22 wks (NaCl & L-NAME)	M	2013-07-25	645	0.677556	108.198	14.3885	371.286	PW_prox (N = 14)	-	-	-	-	-	-	-	3.66208	18.1291	20.2905	436.655	PW_dist (N = 29)	-	1.50987	20.2836	12.2305	412.458	RCCA_PW (N = 24)	-		403.97	8.70774	-
		2013-07-29	653	1.36364	138.982	12.6255	391	PW_prox (N = 24)	-	10.2941	45.3571	13.0263	493.773	SAA_PW (N = 22)	-	7.4786	41.7787	17.4841	428.9	PW_dist (N = 30)	-	-0.270769	14.0432	10.452	483.793	RCCA_PW (N = 29)	-		409.95	6.25039
		2013-07-29	656	1.35254	98.2774	11.0597	443.303	PW_prox (N = 33)	-	9.39392	42.1933	15.5513	461.583	SAA_PW (N = 12)	-	1.95184	19.324	19.1652	483.481	PW_dist (N = 27)	-	5.14982	37.6704	11.1055	467	RCCA_PW (N = 22)	-		463.392	9.41585
		2013-08-26	670	-3.33257	135.987	14.458	366.389	PW_prox (N = 18)	-	3.25136	48.5442	13.2823	488.077	SAA_PW (N = 13)	-	7.6925	57.1836	16.7264	473.467	PW_dist2 (N = 30)	-	10.5278	46.7172	12.5922	368.765	RCCA_PW (N = 17)	-		419.928	6.24435	-
		2013-12-06	779	-6.50609	96.5129	7.98608	509.542	PW_prox (N = 24)	-	5.74874	29.5173	13.4092	482.483	SAA_PW (N = 29)	-	5.32919	32.7261	19.4299	469.125	PW_dist (N = 32)	-	7.97465	57.8945	8.75687	537.577	RCCA_PW2 (N = 26)	-		489.333	10.3116
		2014-08-21	182	-0.662914	78.4757	8.73799	309.043	PW_prox (N = 23)	-	-	-	-	-	-	-	-	-	-	-	-	-	5.34833	21.8722	15.8856	382.471	LCCA_PW (N = 17)	-		309.043	-
		2014-08-21	184	2.00629	171.351	11.6108	377.107	PW_prox (N = 28)	-	-	-	-	-	-	-	3.21653	33.7294	19.082	403.533	PW_dist (N = 15)	-	4.2955	44.4562	11.4581	407.722	LCCA_PW (N = 18)	-		390.32	8.51024	-
		2014-08-12	188	-0.689546	100.73	13.0492	499.96	PW_prox (N = 25)	-	-	-	-	-	-	-	3.24704	41.794	23.4339	517.222	PW_dist (N = 27)	-	1.9425	60.358	11.89	527.375	LCCA_PW (N = 24)	-		508.591	11.0038	-
		2014-08-12	190	-2.92721	65.8821	8.45423	409.556	PW_prox (N = 18)	Low Systolic Vel	2.09375	31.3824	21.105	407.333	SAA_PW(N = 24)	-	5.15046	31.3976	22.1765	406.194	PW_dist (N = 31)	-	0.670412	25.8626	12.8012	407.393	LCCA_PW (N = 28)	-		407.875	13.596	-
		2014-08-05	192	-4.4197	157.483	9.88559	403.1	PW_prox (N = 10)	-	2.61734	35.479	17.6013	455.818	SAA_PW (N = 22)	-	-	-	-	-	-	Noisy Images	-	-	-	-	-	-		403.1	-	-
		2014-11-04	256	0.836913	124.656	13.0879	380.348	PW_prox (N = 23)	-	5.85128	63.7292	15.1685	494.556	SAA_PW (N = 27)	-	4.22058	47.3855	17.7793	487.485	PW_dist (N = 33)	-	2.30495	21.0811	12.733	417.577	RCCA_PW (N = 26)	-		433.916	8.50207	-
		2014-11-11	257	0.707008	136.895	9.27866	368.706	PW_prox (N = 17)	-	5.91323	57.6138	8.28749	406.294	SAA_PW (N = 17)	-	4.02024	38.7807	15.6073	407.421	PW_dist (N = 19)	-	8.12655	53.4425	9.1319	368.125	LCCA_PW (N = 16)	-		388.063	7.56997	-
		mean		-0.966174	117.786	11.2185	402.445	12		5.64547	44.227	14.6789	461.24	8		4.59691	36.2229	19.1175	451.348	10		4.32542	36.6983	11.7306	434.569	11			418.957	9.0112
		SD		2.7073	31.7564	2.32243	57.2821			3.00718	12.1977	3.74126	36.4383			1.84997	11.9587	2.40284	40.08			3.46604	16.7772	1.95267	60.3279				51.9806	2.23116
		SEM		0.781529	9.16728	0.670427	16.5359			1.0632	4.31252	1.32273	12.8829			0.585012	3.78166	0.759846	12.6744			1.04505	5.05853	0.588751	18.1895				15.0055	0.705553
	F	2013-07-25	641	0.222242	79.3903	10.8883	368.267	PW_prox1 (N = 15)	-	-	-	-	-	-	-	5.25163	35.7038	20.5665	494	PW_dist (N = 22)	-	11.7319	94.7719	7.24706	552.222	RCCA_PW (N = 27)	-		431.133	14.2648	-
		2013-08-08	663	-5.93034	113.098	8.36606	536.062	PW_dist (N = 32)	-	-	-	-	-	-	-	6.82385	31.1941	17.3294	568.214	PW_dist (N = 28)	-	8.2397	50.1047	8.80981	546.783	RCCA_PW (N = 23)	-		552.138	9.71146	-
		2013-08-09	668	-5.31544	141.459	19.6202	449.625	PW_prox (N = 16)	-	0.460487	35.9923	16.7572	407.636	SAA_PW (N = 11)	-	2.62478	26.4973	21.711	471.739	PW_dist (N = 23)	-	1.37006	48.8937	9.2159	487.355	RCCA_PW (N = 31)	-		460.682	3.08281	-
		2013-08-26	673	1.02639	143.378	10.7293	388.556	PW_prox (N = 9)	-	2.19895	27.2415	12.3968	540.889	SAA_PW (N = 9)	-	6.4276	28.8426	18.0049	536.943	PW_dist (N = 35)	-	14.3404	125.243	9.62426	614.679	RCCA_PW (N = 28)	-		462.749	11.8826	-
		2013-08-26	675	2.01359	84.0821	8.55457	362.125	PW_prox (N = 16)	-	6.79052	39.8765	15.6537	505.471	SAA_PW (N = 17)	-	3.42677	20.3494	21.9616	488.818	PW_dist (N = 22)	-	3.26665	33.5774	7.50182	416.222	RCCA_PW (N = 18)	-		425.472	17.9505	-
		2013-12-12	790	1.25268	121.36	10.8863	360.9	PW_prox (N = 20)	-	-	-	-	-	-	-	3.09565	39.1806	20.4996	418.333	PW_dist (N = 27)	-	1.35598	58.6119	10.9478	412.933	RCCA_PW2 (N = 15)	-		389.617	11.9266	-
		2014-08-19	195	-0.734748	99.5327	11.5267	425.176	PW_prox (N = 17)	-	-	-	-	-	-	-	3.83578	21.0867	23.9871	420.121	PW_dist (N = 33)	-	0.905222	17.5185	10.2444	429.912	LCCA_PW2 (N = 34)	-		422.649	12.2481	-
		2014-08-26	199	0.821728	95.2941	9.21001	333.435	PW_prox2 (N = 23)	-	2.49009	31.0347	13.9127	465.429	SAA_PW (N = 7)	Selected Cycles	1.49273	26.2939	20.0086	425.444	PW_dist (N = 18)	-	7.1155	54.3343	11.3531	387.233	LCCA_PW2 (N = 30)	-		379.44	14.3411	-
		2014-11-04	240	1.36753	163.229	12.3415	509.533	PW_prox (N = 30)	-	7.03448	41.3574	16.9563	520.079	SAA_PW2 (N = 38)	-	0.654571	33.2446	22.7714	519.607	PW_dist (N = 28)	-	0.547945	27.4136	14.2689	518.7	LCCA_PW2 (N = 30)	-		514.57	10.7736	-
		2014-11-11	250	1.35425	162.852	6.82067	493.368	PW_prox (N = 19)	-	5.76841	47.1152	8.86537	504.762	SAA_PW (N = 21)	-	3.28037	29.884	17.0953	492.969	PW_dist (N = 32)	-	6.15443	44.1544	5.46755	510.69	LCCA_PW (N = 29)	-		493.169	10.2649	-
		mean		-0.392212	120.367	10.8944	422.705	10		4.12382	37.1029	14.0903	490.711	6		3.69137	29.2277	20.3935	483.619	10		5.50278	55.4624	9.46807	487.673	10			453.162	11.6446
		SD		2.85833	31.1425	3.4954	71.26			2.75979	7.2297	3.09743	47.6155			1.98725	5.98838	2.33156	50.9212			4.85782	32.1989	2.46574	74.0865				54.7442	3.86011
		SEM		0.903883	9.84813	1.10534	22.5344			1.12668	2.95151	1.26452	19.4389			0.628422	1.89369	0.737303	16.1027			1.53618	10.1822	0.779734	23.4282				17.3116	1.22068
	t-test			0.636508	0.849826	0.805383	0.478283			0.346345	0.198795	0.753345	0.237723			0.305589	0.121622	0.243741	0.133675			0.535158	0.122333	0.0331933	0.0907811				0.151951	0.082261
Tr-KO		Test Dates	Mouse #	ATA						SAA						IAA						CCA							Global Pulse Transit Time
				Blood Velocity (cm/s)		∆t (ms)	HR (bpm)	Data File	Comments	Blood Velocity (cm/s)		∆t (ms)	HR (bpm)	Data File	Comments	Blood Velocity (cm/s)		∆t (ms)	HR (bpm)	Data File	Comments	Blood Velocity (cm/s)		∆t (ms)	HR (bpm)	Data File	Comments		Mean HR (bpm)	PTT (ms)	Comments
				diastole	systole					diastole	systole					diastole	systole					diastole	systole
Fbln5 -/- @ 20-22 wks (NaCl & L-NAME)	M	2013-08-16	678	-9.99178	229.042	9.42775	393.655	PW_prox (N = 29)	-	-	-	-	-	-	Noisy Images	0.83325	71.6714	16.8917	421.714	PW_dist (N = 21)	-	6.75986	66.0992	6.12235	493.185	RCCA_PW (N = 27)	-		407.685	8.36964	-
		2013-08-16	679	0	72.8775	10.059	344	PW_dist (N = 16)	Near BCA	-	-	-	-	-	Noisy Images	9.68768	71.968	18.6659	419.357	PW_dist (N = 14)	-	4.04871	58.0928	8.3647	378.278	RCCA_PW (N = 18)	-		381.679	11.4426
		2013-12-06	780	2.02532	201.375	9.89516	525.889	PW_prox (N = 27)	-	4.70008	45.266	11.2136	523.773	SAA_PW (N = 22)	-	2.61132	28.0113	21.0525	446.917	PW_dist (N = 24)	-	0	54.762	6.28538	581.25	RCCA_PW (N = 16)	-		486.403	8.64505
		2013-12-12	787	-1.75003	212.165	5.27169	512.541	PW_prox (N = 37)	-	-	-	-	-	-	Noisy Images	5.98405	28.1578	16.7761	551.341	PW_dist (N = 44)	-	12.7315	84.0333	6.01566	613.585	RCCA_PW (N = 41)	-		531.941	12.3085	-
		2014-08-14	181	-1.24922	222.823	13.2434	471.864	PW_prox (N = 22)	-	-	-	-	-	-	Noisy Images	3.22108	22.6501	22.3628	480.333	PW_dist (N = 12)	-	2.51569	38.0142	8.85395	535.515	LCCA_PW (N = 33)	-		476.098	9.43607	-
		mean		-2.19314	187.656	9.57941	449.59	5		4.70008	45.266	11.2136	523.773	1		4.46748	44.4917	19.1498	463.932	5		5.21115	60.2003	7.12841	520.363	5			456.761	10.0404
		SD		4.5965	65.024	2.84316	78.3555			#DIV/0!	#DIV/0!	#DIV/0!	#DIV/0!			3.45532	25.0456	2.49558	54.6994			4.86639	16.8007	1.36629	91.5888				61.1359	1.74741
		SEM		2.05562	29.0796	1.2715	35.0417			#DIV/0!	#DIV/0!	#DIV/0!	#DIV/0!			1.54526	11.2007	1.11606	24.4623			2.17632	7.51349	0.611023	40.9598				27.3408	0.781466
	F	2013-07-25	639	0	125.59	7.87295	383.111	PW_prox (N = 18)	-	-	-	-	-	-	Noisy Images	0.613307	19.5828	21.2409	395.882	PW_dist (N = 17)	Weird Wave!	-	-	-	-	-	Noisy Images		389.497	13.8453	-
		2013-07-25	640	0	213.945	13.615	493.909	PW_prox1 (N = 33)	-	0.575157	31.4156	12.2717	464.273	SAA_PW (N = 11)	-	1.82166	31.8528	20.0416	483.429	PW_dist (N = 14)	-	0.32605	25.943	11.7955	499.368	RCCA_PW (N = 19)	-		488.669	6.0657	-
		2013-08-08	662	-7.02767	161.429	6.99883	428.517	PW_prox (N = 29)	-	7.88432	67.7557	11.3162	466.267	SAA_PW (N = 15)	-	10.1943	62.9771	14.6048	418.95	PW_dist (N = 20)	-	-	-	-	-	-	Noisy Images		423.734	7.36209	-
		2013-08-09	667	-4.48669	91.5749	5.18616	348.688	PW_prox (N = 16)	-	2.02906	18.4153	15.1926	400.125	SAA_PW (N = 16)	-	4.5786	39.7083	16.5075	345.625	PW_dist (N = 24)	-	0.403374	21.1193	8.11296	348.667	RCCA_PW (N = 18)	-		347.156	11.2257	-
		2014-08-05	193	0.0452833	106.252	8.47642	412.567	PW_prox (N = 30)	-	-	-	-	-	-	Noisy Images	11.0432	77.062	20.9658	487.5	PW_dist (N = 32)	-	3.40781	61.3127	7.50181	544.577	LCCA_PW (N = 26)	-		450.033	14.9406	-
		2014-08-26	198	-4.3679	67.8236	8.51579	418.474	PW_prox (N = 19)	-	3.06341	39.4946	17.2281	480.464	SAA_PW (N = 28)	-	2.37406	28.393	21.0707	475.318	PW_dist (N = 22)	-	10.3448	64.5629	11.044	451.885	LCCA_PW (N = 26)	-		446.896	14.4365	-
		2014-11-04	241	0	153.329	6.79377	377.389	PW_prox2 (N = 18)	-	6.53434	78.2679	13.6007	456	SAA_PW (N = 23)	-	10.3891	72.9934	15.5885	492.185	PW_dist (N = 27)	Uncertain Location	3.86171	67.4426	4.81246	507.061	LCCA_PW (N = 33)	-		434.787	11.7495	-
		2014-11-11	251	-9.12662	147.114	8.30533	466.182	PW_prox2 (N = 22)	-	0.599555	41.7328	10.6059	513.333	SAA_PW (N = 15)	-	0.969914	39.0324	15.4198	507.68	PW_dist (N = 25)	-	7.21233	64.1319	7.1189	483.75	RCCA_PW (N = 28)	-		486.931	8.12545	-
		mean		-3.12045	133.382	8.22053	416.105	8		3.44764	46.1803	13.3692	463.41	6		5.24801	46.4502	18.18	450.821	8		4.25935	50.7521	8.39762	472.551	6			433.463	10.9689
		SD		3.66444	45.835	2.45288	47.6085			3.08981	22.5765	2.50296	37.0189			4.54675	21.6341	2.89988	57.387			3.92367	21.2295	2.60466	67.8199				47.5692	3.42017
		SEM		1.29557	16.2051	0.867223	16.8322			1.26141	9.21681	1.02183	15.1129			1.60752	7.64881	1.02526	20.2894			1.60183	8.66689	1.06335	27.6873				16.8183	1.20921
	t-test			0.713802	0.150257	0.4042	0.422768			#DIV/0!	#DIV/0!	#DIV/0!	#DIV/0!			0.733295	0.888918	0.537081	0.689625			0.734116	0.431409	0.331783	0.364552				0.49142	0.532479
		t-tests		ATA						SAA						IAA						CCA							Global Pulse Transit Time
				Blood Velocity (cm/s)		∆t (ms)	HR (bpm)	Comments		Blood Velocity (cm/s)		∆t (ms)	HR (bpm)	Comments		Blood Velocity (cm/s)		∆t (ms)	HR (bpm)	Comments		Blood Velocity (cm/s)		∆t (ms)	HR (bpm)	Comments			Mean HR (bpm)	PTT (ms)	Comments
				diastole	systole					diastole	systole					diastole	systole					diastole	systole
	M	Un-WT vs Un-KO		0.643623	0.630074	0.981806	0.919464			#DIV/0!	#DIV/0!	#DIV/0!	#DIV/0!			0.672228	0.304547	0.204653	0.934571			0.647594	0.752519	0.345168	0.719011				0.996867	0.211222
		Un-WT vs Un-OLD		0.446423	0.0358564	0.436955	0.238147			#DIV/0!	#DIV/0!	#DIV/0!	#DIV/0!			0.8652	0.039802	0.069826	0.371717			0.840004	0.0647209	0.0484198	0.931334				0.288459	0.192799
		Un-WT vs Tr-WT		0.193524	0.495736	0.787612	0.59202			#DIV/0!	#DIV/0!	#DIV/0!	#DIV/0!			0.64352	0.28686	0.033709	0.499865			0.983949	0.707157	0.224379	0.59461				0.837963	0.247608
		Un-KO vs Tr-KO		0.972136	0.0631416	0.364927	0.632139			#DIV/0!	#DIV/0!	#DIV/0!	#DIV/0!			0.862215	0.608605	0.64481	0.450437			0.482831	0.140251	0.147736	0.318778				0.508998	0.361066
	F	Un-WT vs Un-KO		0.700048	0.431346	0.177515	0.377562			#DIV/0!	#DIV/0!	#DIV/0!	#DIV/0!			0.678923	0.451612	0.173076	0.730973			0.888782	0.148665	0.0471019	0.944819				0.502626	0.777114
		Un-WT vs Un-OLD		0.758108	0.0271864	0.303324	0.440363			#DIV/0!	#DIV/0!	#DIV/0!	#DIV/0!			0.827821	0.0861099	0.202063	0.356155			0.979668	0.257511	0.358653	0.702583				0.403962	0.869053
		Un-WT vs Tr-WT		0.714743	0.329395	0.978695	0.730499			#DIV/0!	#DIV/0!	#DIV/0!	#DIV/0!			0.418235	0.246715	0.755068	0.177566			0.946145	0.718584	0.10356	0.635608				0.617252	0.403631
		Un-KO vs Tr-KO		0.0952711	0.408228	0.842497	0.742482			#DIV/0!	#DIV/0!	#DIV/0!	#DIV/0!			0.854714	0.843312	0.662288	0.524294			0.506596	0.113248	0.999323	0.992438				0.589863	0.838883
Un-WT		Test Dates	Mouse #	ATA						SAA						IAA						CCA							Global Pulse Transit Time
				Blood Velocity (cm/s)		∆t (ms)	HR (bpm)	Data File	Comments	Blood Velocity (cm/s)		∆t (ms)	HR (bpm)	Data File	Comments	Blood Velocity (cm/s)		∆t (ms)	HR (bpm)	Data File	Comments	Blood Velocity (cm/s)		∆t (ms)	HR (bpm)	Data File	Comments		Mean HR (bpm)	PTT (ms)	AL (mm)	PWV (m/s)	Comments
				diastole	systole					diastole	systole					diastole	systole					diastole	systole
Lmna +/+ @ 20 wks	M
																																	-
		mean		#DIV/0!	#DIV/0!	#DIV/0!	#DIV/0!	0		#DIV/0!	#DIV/0!	#DIV/0!	#DIV/0!	0		#DIV/0!	#DIV/0!	#DIV/0!	#DIV/0!	0		#DIV/0!	#DIV/0!	#DIV/0!	#DIV/0!	0			#DIV/0!	#DIV/0!	#DIV/0!	#DIV/0!
		SD		#DIV/0!	#DIV/0!	#DIV/0!	#DIV/0!			#DIV/0!	#DIV/0!	#DIV/0!	#DIV/0!			#DIV/0!	#DIV/0!	#DIV/0!	#DIV/0!			#DIV/0!	#DIV/0!	#DIV/0!	#DIV/0!				#DIV/0!	#DIV/0!	#DIV/0!	#DIV/0!
		SEM		#DIV/0!	#DIV/0!	#DIV/0!	#DIV/0!			#DIV/0!	#DIV/0!	#DIV/0!	#DIV/0!			#DIV/0!	#DIV/0!	#DIV/0!	#DIV/0!			#DIV/0!	#DIV/0!	#DIV/0!	#DIV/0!				#DIV/0!	#DIV/0!	#DIV/0!	#DIV/0!
	F	2018-12-07	P165	-0.0263887	65.2545	7.1874	392									6.16346	20.0346	19.4029	440										416	13.7496	45.64	3.31937	-
		2018-12-07	P166	0.373298	68.9695	11.043	360									7.20354	23.7091	20.2989	413										386.5	11.4048	46.77	4.10089	-
		2019-03-08	P1120	1.93583	51.2696	9.72066	403									3.86089	17.8027	20.4346	435										419	11.8655	43.02	3.62564	-
																																	-
		2013-06-17	602	1.18595	98.6132	11.3897	485.304	PW_prox (N = 23)	-	-	-	-	-	-	-	4.06881	32.616	19.2646	413.375	PW_dist (N = 16)	-	1.9278	17.4535	13.7549	477.913	RCCA_PW (N = 23)	-		455.729	12.2	38.5351	3.15861	Fede sim data
		2013-06-17	603	1.1275	82.9039	15.3697	366.556	PW_prox (N = 18)	-	-	-	-	-	-	-	2.58869	18.2629	24.01	354.588	PW_dist (N = 17)	-	5.6268	51.2145	15.7887	462.05	RCCA_PW (N = 20)	-		440.164	11.9	39.9593	3.35792
		2013-06-24	606	0.485775	86.4812	13.2052	405.636	PW_dist (N = 22)	Bad PW at Root!	-	-	-	-	-	-	7.53217	34.0585	21.6599	474.692	PW_dist2 (N = 13)	-	3.19228	42.6463	11.5319	485.25	RCCA_PW (N = 16)	-		561.758	17.8	42.5501	2.39046
		mean		0.846994	75.582	11.3193	402.083	6		#DIV/0!	#DIV/0!	#DIV/0!	#DIV/0!	0		5.23626	24.414	20.8452	421.776	6		3.58229	37.1048	13.6918	475.071	3			446.525	13.1533	42.7457	3.32548
		SD		0.706654	16.996	2.81681	44.8868			#DIV/0!	#DIV/0!	#DIV/0!	#DIV/0!			2.01322	7.23201	1.77341	39.9222			1.88009	17.5494	2.12907	11.8582				61.1494	2.41423	3.16792	0.564725
		SEM		0.28849	6.93857	1.14996	18.3249			#DIV/0!	#DIV/0!	#DIV/0!	#DIV/0!			0.821895	2.95245	0.723993	16.2982			1.08547	10.1321	1.22922	6.84636				24.9641	0.985605	1.2933	0.230548
	t-test			3.29091e-06	0.0459316	0.204941	0.00974315			#DIV/0!	#DIV/0!	#DIV/0!	#DIV/0!			0.000702025	0.771744	0.0136247	0.145097			#DIV/0!	#DIV/0!	#DIV/0!	#DIV/0!				0.461266	0.000453203	0.00660991	0.00494839
Un-WT		Test Dates	Mouse #	ATA						SAA						IAA						CCA							Global Pulse Transit Time
				Blood Velocity (cm/s)		∆t (ms)	HR (bpm)	Data File	Comments	Blood Velocity (cm/s)		∆t (ms)	HR (bpm)	Data File	Comments	Blood Velocity (cm/s)		∆t (ms)	HR (bpm)	Data File	Comments	Blood Velocity (cm/s)		∆t (ms)	HR (bpm)	Data File	Comments		Mean HR (bpm)	PTT (ms)	AL (mm)	PWV (m/s)	Comments
				diastole	systole					diastole	systole					diastole	systole					diastole	systole
Lmna G609G/G609G @ 20 wks	M																												455.729	12.2	38.5351	3.15861	Fede sim data
																													440.164	11.9	39.9593	3.35792	from J data
																													561.758	17.8	42.5501	2.39046	-
																																	-
																																	-
		mean		#DIV/0!	#DIV/0!	#DIV/0!	#DIV/0!	0		#DIV/0!	#DIV/0!	#DIV/0!	#DIV/0!	0		#DIV/0!	#DIV/0!	#DIV/0!	#DIV/0!	0		#DIV/0!	#DIV/0!	#DIV/0!	#DIV/0!	0			485.884	13.9667	40.3482	2.969
		SD		#DIV/0!	#DIV/0!	#DIV/0!	#DIV/0!			#DIV/0!	#DIV/0!	#DIV/0!	#DIV/0!			#DIV/0!	#DIV/0!	#DIV/0!	#DIV/0!			#DIV/0!	#DIV/0!	#DIV/0!	#DIV/0!				66.1683	3.32315	2.03555	0.510847
		SEM		#DIV/0!	#DIV/0!	#DIV/0!	#DIV/0!			#DIV/0!	#DIV/0!	#DIV/0!	#DIV/0!			#DIV/0!	#DIV/0!	#DIV/0!	#DIV/0!			#DIV/0!	#DIV/0!	#DIV/0!	#DIV/0!				38.2023	1.91862	1.17523	0.294938
	F	2017-12-08	P91	-3.26953	45.7314	9.16303	491									0.46825	39.6329	11.849	567		infra_lax								529	4.19535	38.3044	9.13021	-
		2017-12-08	P92	-3.03318	50.4293	8.63629	483									0.171165	28.0251	14.5668	470										476.5	5.61403	36.4166	6.48671	-
		2017-12-08	P98	-3.38324	74.3934	11.9102	468		Transverse arch							-0.185868	16.2786	20.8541	423										445.5	7.28918	38.7606	5.31755	-
		2018-01-04	P110	-3.10245	56.8809	9.57385	472									0.214039	14.8972	17.0375	461		prox to bif								466.5	7.1499	37.0133	5.17676	-
		2018-01-04	P115	-4.77885	45.5173	7.5585	446									1.59961	15.0429	16.091	425										435.5	7.96227	37.2226	4.67487	-
																																	-
																																	-
																																	-
		mean		-3.51345	54.5905	9.36837	472	5		#DIV/0!	#DIV/0!	#DIV/0!	#DIV/0!	0		0.45344	22.7753	16.0797	469.2	5		#DIV/0!	#DIV/0!	#DIV/0!	#DIV/0!	0			470.6	6.44214	37.5435	6.15722
		SD		0.720639	11.995	1.60909	17.1318			#DIV/0!	#DIV/0!	#DIV/0!	#DIV/0!			0.681843	10.9064	3.31285	58.5679			#DIV/0!	#DIV/0!	#DIV/0!	#DIV/0!				36.4836	1.52176	0.963625	1.78962
		SEM		0.322279	5.36434	0.719605	7.66159			#DIV/0!	#DIV/0!	#DIV/0!	#DIV/0!			0.304929	4.87749	1.48155	26.1924			#DIV/0!	#DIV/0!	#DIV/0!	#DIV/0!				16.3159	0.680553	0.430946	0.800342
	t-test			3.29091e-06	0.0459316	0.204941	0.00974315			#DIV/0!	#DIV/0!	#DIV/0!	#DIV/0!			0.000702025	0.771744	0.0136247	0.145097			#DIV/0!	#DIV/0!	#DIV/0!	#DIV/0!				0.461266	0.000453203	0.00660991	0.00494839

## Sheet: Tail-Cuff Pressure
Un-WT		Test Dates	Mouse #	Age (wks)	Body Mass (g)	Tail-Cuff Pressure (mmHg)					Comments
						Pdias	Psys	Pmean	PP	HR (bpm)
Fbln5 +/+ @ 20-22 wks (Untreated)	M	08/07/12 - 08/08/12	292	20.86	40	76.1429	106.923	86.6429	30.4615	693.214	-
		08/14/12 - 08/15/12	293	21.86	32	81.4545	118.273	93.5455	36.8182	717.111	-
		08/16/12 - 08/17/12	299	21.86	24	68.7308	103.769	80.0962	35.0385	695.451	-
		08/17/12 - 08/19/12	309	21.86	30	93.1429	126.857	104	33.7143	723.571	-
		08/20/12 - 08/21/12	322	20	40	65.6923	108.92	79.16	44	732.333	-
		2014-06-03	999	21.86	32	86.5652	123.826	98.6522	37.2609	575.727	-
		2013-06-07	587	21.29	25.8	94.5806	133.812	107.645	39.2319	669.323	-
		2013-06-10	592	20.14	29.4	76.875	107.174	87.25	30.2989	766.643	-
		2013-06-14	593	20.71	19.5	125.429	164.357	138	38.9286	604.5	-
		2013-06-17	600	20.14	25	72.5135	103.278	82.7568	30.7643	746.533	-
		mean		21.058	29.77	91.1926	126.489	102.861	35.2969	672.545	10
		SD		0.78823	6.63929	20.9696	24.5283	21.9274	4.41743	84.1767
		SEM		0.24926	2.09953	6.63117	7.75654	6.93404	1.39691	26.619
	F	08/15/12 - 08/16/12	295	22	25	71.0952	104.095	81.7143	33	605.2	-
		08/21/12 - 08/22/12	320	22.43	20	78.9167	125.25	94.25	46.3333	603.833	Meas from 08/20/12
		08/22/12 - 08/23/12	324	20.29	24	77.7612	113.923	89.3731	35.7969	699.969	Meas from 08/22/11
		08/24/12 - 08/25/12	328	20	20	85.2857	123	97.2857	37.7143	728	Meas from 08/20/12
		08/27/12 - 08/28/12	331	20.43	25	85.8974	114.513	95.1026	28.6154	745.513	-
		05/28/14 - 05/30/2014	995	21.43	21	101.429	139.98	113.959	38.551	338.93	-
		2013-06-03	572	22.29	24.3	91.25	125.25	102.5	34	531.5	-
		2013-06-06	580	21.57	26	100.192	135.231	111.577	35.0385	550.115	-
		2013-06-07	588	21.29	23.6	92.1923	122.04	102.038	29.8477	696.348	-
		2013-06-17	604	20.14	29.4	73.3125	105.406	84.4848	32.0938	649.773	-
		mean		21.187	23.83	85.7332	120.869	97.2285	35.0991	614.918	10
		SD		0.914197	2.90824	10.5744	11.6661	10.6192	5.05213	121.32
		SEM		0.289095	0.919668	3.34391	3.68914	3.35809	1.59762	38.3647
	t-test			0.739395	0.0231617	0.805061	0.872273	0.827552	0.798808	0.0937497
Un-KO		Test Dates	Mouse #	Age (wks)	Body Mass (g)	Tail-Cuff Pressure (mmHg)					Comments
						Pdias	Psys	Pmean	PP	HR (bpm)
Fbln5 -/- @ 20-22 wks (Untreated)	M	03/24/12 - 03/25/12	196	23.43	35	81.8	121	94.4	39.2	-	-
		03/30/12 - 03/31/12	212	21.14	35	86	111.923	94.8077	25.64	787.4	-
		2012-04-02	213	21.57	35	62	98.6522	73.913	36.6522	513.773	Meas from 03/29/12
		04/05/12 - 04/06/12	221	20	25	116.829	144.778	126.912	27.5294	757.818	-
		2013-06-10	583	21.71	39	39.6667	86.3333	55	46.6667	627.667	Thick Tail (3 Data Points)
		2013-06-10	591	20.14	27.8	93.3636	130.318	105.5	36.9545	468.182	-
		2013-06-14	594	20.71	26.2	82.1429	111.857	91.5714	29.7143	632.286	-
		2013-06-20	613	20	23.9	105.517	144.404	117.203	38.8863	669.807	-
		2013-06-24	615	20.57	29.1	79.7381	108.1	88.4286	28.3619	496.368	-
		2013-06-24	619	20.57	25.2	103.88	149.2	118.6	45.32	559.76	-
		mean		20.984	30.12	85.0937	120.657	96.6336	35.4925	612.562	10
		SD		1.05116	5.38719	22.3396	21.1544	21.7355	7.41547	113.168
		SEM		0.332406	1.70358	7.06441	6.68962	6.87335	2.34498	37.7226
	F	04/10/12 - 04/11/12	225	20.71	26	99.6	131.2	109.8	31.6	818	-
		2012-04-25	239	19.43	24	120.5	152.833	131	32.3333	698.4	Rec Prol, Malo, Hydro
		05/29/12 - 05/30/12	254	21.29	35	86.9	126.7	99.9	39.8	659.2	-
		08/08/12 - 08/09/12	314	20.43	31	65	98	75.65	33	579.5	Rec Prol
		2014-06-10	110	20.29	24	84.8824	119.824	96.1765	34.9412	451.353	Rec Prol
		2013-06-03	573	22.29	28.8	75.6	104.6	85	29	693.8	-
		2013-06-07	589	21.29	26.9	77.3636	121.864	91.5455	44.5	727.8	-
		2013-06-07	609	18.57	25.4	72	128.5	90.5	56.5	-	Flat Resp (2 Data Points)
		2013-06-24	620	20.57	27.5	77.814	112.844	89.2326	35.0305	495.814	-
		2013-12-06	773	22.86	25.9	93.8529	130.941	105.882	37.0882	796.5	-
		mean		20.773	27.45	85.3513	122.731	97.4687	37.3793	657.819	10
		SD		1.25806	3.40335	16.0606	15.4259	15.4121	8.04131	126.362
		SEM		0.397833	1.07623	5.07881	4.87809	4.87372	2.54289	42.1207
	t-test			0.688956	0.204742	0.976741	0.805289	0.922265	0.592174	0.435353
Un-OLD		Test Dates	Mouse #	Age (wks)	Body Mass (g)	Tail-Cuff Pressure (mmHg)					Comments
						Pdias	Psys	Pmean	PP	HR (bpm)
Fbln5 +/+ @ 100-110 wks (Untreated)	M	2015-05-14	722	105.71	32.9	70.2	115.12	84.8	44.92	733.75	-
		2015-05-21	733	106.71	24.2	81.3333	130.033	97.2	48.7	702.533	-
		2015-05-14	736	102.71	29.5	47.6111	96.3889	63.4444	48.7778	728.941	Thick tail / Low pressure
		2015-04-30	740	100.71	30.1	54.6667	91.1111	66.5111	36.4444	788.878	-
		2015-04-09	742	97.43	31.2	71.2	104.32	81.88	33.12	666.64	Thick tail
		2015-05-21	747	102.29	30.2	61.75	103.719	75.375	41.9688	766.333	Thick tail
		mean		102.593	29.6833	64.4602	106.782	78.2018	42.3218	731.179	6
		SD		3.37559	2.93899	12.2493	13.9942	12.4935	6.45682	43.7321
		SEM		1.37808	1.19984	5.00074	5.7131	5.10046	2.63599	17.8536
	F	2014-09-16	465	102.29	30.5	83.3784	118.649	94.7568	35.2703	649.944	-
		2014-11-18	484	109.57	42.1	75.5833	111.583	87.1667	36	791.259	-
		2014-11-18	486	109.57	43.1	99.1364	133.159	110.159	34.0227	631.9	-
		2014-12-04	492	111.57	42.8	91	129.328	103.426	38.3279	661.638	-
		2014-09-16	495	100.29	29.1	76.037	114.074	88.3333	38.037	587.071	-
		2014-12-11	501	111.57	36.3	54.4571	95.7714	67.8857	41.3143	770.2	Low pressure
		2014-12-04	507	111.57	24.9	79.5306	114.286	90.8163	34.7551	745.472	-
		2014-12-11	523	109.71	33.6	79.3864	122.841	93.5	43.4545	651.956	-
		2014-10-21	524	102.43	20.6	61.1	105.1	75.4	44	750.267	Few meas / TUMORS
		2015-04-30	732	101.29	31.1	73.4054	105.054	83.5676	31.6486	583.514	-
		mean		106.986	33.41	77.3015	114.985	89.5012	37.683	682.322	10
		SD		4.75983	7.70908	12.9732	11.4966	12.3562	4.13629	75.9903
		SEM		1.50519	2.43782	4.10249	3.63554	3.90739	1.30801	24.0302
	t-test			0.0500846	0.194202	0.072189	0.256482	0.107516	0.156026	0.124957
Tr-WT		Test Dates	Mouse #	Age (wks)	Body Mass (g)	Tail-Cuff Pressure (mmHg)					Comments
						Pdias	Psys	Pmean	PP	HR (bpm)
Fbln5 +/+ @ 20-22 wks (NaCl & L-NAME)	M	2013-07-29	653	19.14	24.7	125.205	167.841	139.159	42.6364	594.323	Noisy measurements
		2013-07-29	656	19.14	25.9	109.235	148.765	122.059	39.5294	566.118	Few measurements
		2013-12-06	779	21.14	25.6	107.654	145.192	119.731	37.5385	690	-
		2014-08-21	182	21.86	21.3	115.944	156.944	129.278	41	752.824	Few measurements
		2014-08-12	188	21.14	26.2	136.05	168.9	146.7	32.85	792.105	Noisy measurements
		2014-08-12	190	21.14	23.4	107.614	145.545	119.932	37.9318	742.591	-
		2014-11-04	256	21.57	25.4	117.28	158.12	130.6	40.84	725.462	Step Change
		2014-11-11	257	22.29	22.1	125.75	166.781	139.094	41.0312	769.286	-
		mean		20.9275	24.325	118.091	157.261	130.819	39.1697	704.088	8
		SD		1.17501	1.84681	10.2413	9.95682	10.0774	3.06791	82.4578
		SEM		0.415429	0.652947	3.62084	3.52027	3.5629	1.08467	29.1532
	F	2013-07-25	641	20.43	24.6	174.089	210.6	185.933	36.5111	466.188	-
		2013-08-08	663	20.14	22.7	150.578	190.156	163.4	39.5778	446.521	-
		2013-08-09	668	20.29	25.1	121.896	166.229	136.354	44.3333	381.64	-
		2013-08-26	673	23	21	154.224	192.02	166.51	37.7959	445.694	-
		2013-08-26	675	23	19.5	101.611	141.741	114.704	40.1296	539.603	Noisy measurements
		2013-12-12	790	20.86	23.2	119.606	159.939	132.697	40.3333	587.385	Step Change
		2014-08-19	195	22.14	22.4	119.97	162.273	133.788	42.303	739.235	-
		2014-08-26	199	21.57	22	101.938	148.25	117	46.3125	515.161	-
		2014-11-04	240	22.14	26.5	144.63	182.185	156.778	37.5556	672.357	-
		2014-11-11	250	22.14	21.1	119.367	152.767	130.133	33.4	619.8	-
		mean		21.571	22.81	130.791	170.616	143.73	39.8252	541.358	10
		SD		1.08277	2.11369	23.9042	22.181	23.2715	3.80782	112.834
		SEM		0.342401	0.668406	7.55917	7.01425	7.3591	1.20414	35.6812
	t-test			0.251111	0.124681	0.154146	0.11252	0.138691	0.691199	0.00279199
Tr-KO		Test Dates	Mouse #	Age (wks)	Body Mass (g)	Tail-Cuff Pressure (mmHg)					Comments
						Pdias	Psys	Pmean	PP	HR (bpm)
Fbln5 -/- @ 20-22 wks (NaCl & L-NAME)	M	2013-08-16	678	20.29	28	-	-	-	-	-	Unreliable measurements
		2013-08-16	679	20.29	-	77.6774	112.548	88.871	34.871	391.688	Noisy measurements
		2013-12-06	780	21.14	25.9	114.143	159.321	128.857	45.1786	650.444	-
		2013-12-12	787	20.86	25.4	120.696	166.391	135.565	45.6957	687.227	Session 2
		2014-08-14	181	20.86	25.8	127.896	167.75	140.812	39.8542	500.8	-
	mean			20.688	26.275	110.103	151.503	123.526	41.3998	557.54	4
	SD			0.380881	1.17011	22.3348	26.2311	23.6161	5.09078	136.841
	SEM			0.170335	0.585057	11.1674	13.1156	11.808	2.54539	68.4206
	F	2013-07-25	639	20.43	24.4	147.575	190.5	161.525	42.925	623.55	-
		2013-07-25	640	20.43	22.7	169.2	210.6	182.6	41.4	528.545	Few measurements
		2013-08-08	662	20.14	24.4	134.49	180.51	149.551	46.0204	431.846	-
		2013-08-09	667	20.29	24	147.698	192.453	162.245	44.7547	415.691	-
		2014-08-05	193	20.14	25.7	108.412	141.588	119.176	33.1765	805.385	Few measurements
		2014-08-26	198	21.57	25.4	127.444	171.556	141.889	44.1111	553.571	-
		2014-11-04	241	22.14	25.2	110.242	148.061	122.485	37.8182	559.618	-
		2014-11-11	251	22.14	21.4	118.185	158.444	131.259	40.2593	513.808	-
	mean			20.91	24.15	132.906	174.214	146.341	41.3081	554.002	8
	SD			0.885793	1.45798	21.0912	23.8017	21.9181	4.20829	122.111
	SEM			0.313175	0.515475	7.45688	8.41518	7.74922	1.48785	43.1727
		t-tests		Age (wks)	Body Mass (g)	Pdias (mmHg)	Psys (mmHg)	Pmean (mmHg)	PP (mmHg)	HR (bpm)	Comments
	M	Un-WT vs Un-KO		0.860783	0.898497	0.914114	0.91798	0.924109	0.954454	0.0838285
		Un-WT vs Un-OLD		1.11276e-08	0.971943	0.0199081	0.141601	0.0370596	0.0566591	0.163715
		Un-WT vs Tr-WT		0.792315	0.0313242	0.00012166	8.95093e-05	0.000104179	0.0666015	0.74448
		Un-KO vs Tr-KO		0.442951	0.0565813	0.110895	0.0943951	0.104167	0.125009	0.513146
	F	Un-WT vs Un-KO		0.411962	0.020052	0.950721	0.764556	0.968134	0.459331	0.461994
		Un-WT vs Un-OLD		1.82206e-13	0.00338658	0.129247	0.270828	0.15138	0.227404	0.157059
		Un-WT vs Tr-WT		0.403073	0.382583	0.000131523	2.29949e-05	7.61376e-05	0.0305552	0.177424
		Un-KO vs Tr-KO		0.790211	0.0163115	0.000157257	0.000220701	0.000169308	0.203511	0.105937
Progeria		Test Dates	Mouse #	Age (wks)	Body Mass (g)	Tail-Cuff Pressure (mmHg)					Comments
						Pdias	Psys	Pmean	PP	HR (bpm)
Lmna G609G/G609G @ 20 wks	F WT	2018-12-05	P165	20.14	22.5	106.25	135.042	115.458	28.4583
		2018-12-05	P166	20.14	23.6	89.875	115.25	98	25.375
		2019-03-08	P1120	20.4286	21.2	98.3478	128.13	107.957	29.7826
		05/28/14 - 05/30/2014	995	21.43	21	101.429	139.98	113.959	38.551	338.93
		2013-06-03	572	22.29	24.3	91.25	125.25	102.5	34	531.5
		2013-06-06	580	21.57	26	100.192	135.231	111.577	35.0385	550.115
		2013-06-07	588	21.29	23.6	92.1923	122.04	102.038	29.8477	696.348
		2013-06-17	604	20.14	29.4	73.3125	105.406	84.4848	32.0938	649.773
	mean			20.9286	23.95	94.1061	125.791	104.497	31.6434	553.333	8
	SD			0.824839	2.74226	10.1293	11.4797	10.1735	4.15972	138.03
	SEM			0.291625	0.969536	3.58126	4.05869	3.59689	1.47068	61.729
	F KO	2017-12-08	P91	20.43	12.7	73.0833	94.3333	79.8333	21.25
		2017-12-08	P92	20.43	12	87.087	113.957	95.6957	26.8696
		2017-12-08	P98 (died)	20.43	11.9
		2018-01-04	P110	20.86	11.9	75.9487	105.82	85.5897	29.8718
		2018-01-04	P115	20.86	11.6	56.9118	89.4412	67.3824	32.5294
	mean			20.602	12.02	73.2577	100.888	82.1253	27.6302	#DIV/0!	4
	SD			0.235521	0.408656	12.4594	11.0922	11.8147	4.84123	#DIV/0!
	SEM			0.105328	0.182757	6.2297	5.54608	5.90737	2.42061	#DIV/0!
	t-test			0.412914	1.22357e-06	0.0107104	0.0050259	0.00658396	0.165064
		All Female	Mean	21.0884	24.3	93.1711	125.71	103.887	32.5137
		WT	SD	0.801013	2.79732	10.1723	11.7002	10.2869	3.86759
			SEM	0.222161	0.775837	2.82129	3.24504	2.85308	1.07268

## Sheet: M-Mode SAX
Un-WT		Test Dates	Mouse #	ATA					SAA					IAA					CCA							Circumferential Displacements & Linear Strains									Circumferential Stretches & Green Strains
				Inner Diameter (µm)		HR (bpm)	Data File	Comments	Inner Diameter (µm)		HR (bpm)	Data File	Comments	Inner Diameter (µm)		HR (bpm)	Data File	Comments	Inner Diameter (µm)		HR (bpm)	Data File	Comments			ATA		SAA		IAA		CCA			ATA		SAA		IAA		CCA
				diastole	systole				diastole	systole				diastole	systole				diastole	systole						∆id (µm)	εϑ	∆id (µm)	εϑ	∆id (µm)	εϑ	∆id (µm)	εϑ		idsys/iddia	Eϑϑ	idsys/iddia	Eϑϑ	idsys/iddia	Eϑϑ	idsys/iddia	Eϑϑ
Fbln5 +/+ @ 20-22 wks (Untreated)	M	2013-06-14	577	1255.89	1547.45	330.75	ATA_SAX (N = 12)	Good Images	1026.8	1165.34	395.222	SAA_SAX (N = 11)	Good Images	595.838	680.005	345	IAA_SAX (N = 9)	Good Images	381.485	431.282	366.125	RCCA_SAX (N = 16)	Good Images			291.563	0.232157	138.536	0.134921	84.1672	0.141258	49.7977	0.130537		1.23216	0.259105	1.13492	0.144022	1.14126	0.151235	1.13054	0.139057
		2013-06-07	587	1191.08	1448.88	363.692	ATA_SAX (N = 13)	Good Images	839.282	1017.91	412.182	SAA_SAX (N = 11)	Good Images	635.638	730.711	321.333	IAA_SAX (N = 3)	Bad Images	331.612	379.822	365	RCCA_SAX (N = 14)	Good Images			257.803	0.216445	178.627	0.212833	95.074	0.149573	48.2101	0.145381		1.21645	0.23987	1.21283	0.235482	1.14957	0.160759	1.14538	0.155949
		2013-06-10	592	1139.2	1429.07	421.654	ATA_SAX (N = 26)	Good Images	882.151	1099.37	428.583	SAA_SAX (N = 12)	Good Images	619.433	740.756	436.636	IAA_SAX1 (N = 11)	Good Images	-	-	-	RCCA_SAX (N = 9)	Diastolic Artifacts			289.864	0.254445	217.224	0.246243	121.323	0.195861	-	-		1.25444	0.286816	1.24624	0.276561	1.19586	0.215042	-	-
		2013-06-14	593	-	-	-	-	WEIRD Wave!	-	-	-	-	Noisy Images	469.029	565.258	383.455	IAA_SAX (N = 11)	Noisy Images	370.083	458.198	422.182	RCCA_SAX (N = 11)	Good Images			-	-	-	-	96.229	0.205166	88.1149	0.238095		-	-	-	-	1.20517	0.226213	1.2381	0.26644
		2013-06-17	600	1258.23	1473.67	697.818	ATA_SAX (N = 33)	Good Images	972.075	1062.66	544.733	SAA_SAX1 (N = 15)	Good Images	558.099	638.487	536.76	IAA_SAX (N = 25)	Good Images	464.708	541.831	505.2	LCCA_SAX (N = 20)	Noisy Images			215.448	0.171232	90.5809	0.0931831	80.3878	0.144039	77.1236	0.165962		1.17123	0.185892	1.09318	0.0975246	1.14404	0.154412	1.16596	0.179733
		mean		1211.1	1474.77	453.479	4		930.077	1086.32	445.18	4		575.607	671.044	404.637	5		386.972	452.783	414.627	4				263.67	0.21857	156.242	0.171795	95.4362	0.167179	65.8116	0.169994		1.21857	0.242921	1.17179	0.188398	1.16718	0.181532	1.16999	0.185295
		SD		57.1452	51.7772	167.171			84.9698	62.3269	67.7519			66.3307	72.0259	85.7689			56.0445	67.6868	66.0198					35.702	0.0351994	54.2977	0.0701575	16.0025	0.0307532	19.9304	0.047668		0.0351994	0.0426234	0.0701575	0.082091	0.0307532	0.0360701	0.047668	0.0566116
		SEM		28.5726	25.8886	83.5856			42.4849	31.1635	33.876			29.664	32.211	38.357			28.0222	33.8434	33.0099					17.851	0.0175997	27.1489	0.0350787	7.15655	0.0137533	9.96518	0.023834		0.0175997	0.0213117	0.0350787	0.0410455	0.0137533	0.016131	0.023834	0.0283058
	F	2013-06-03	572	-	-	-	-	-	-	-	-	-	-	554.885	655.728	466.867	IAA_SAX (N = 15)	Good Images	329.572	409.326	681.56	LCCA_SAX (N = 25)	Good Images			-	-	-	-	100.844	0.181738	79.7542	0.241993		-	-	-	-	1.18174	0.198252	1.24199	0.271274
		2013-06-06	580	1179.52	1453.66	373.133	ATA_SAX (N = 15)	Good Images	783.229	1003.26	349.222	SAA_SAX2 (N = 9)	Good Images	590.817	688.607	396.333	IAA_SAX1 (N = 6)	Selected Cycles	400.564	478.896	366.077	RCCA_SAX (N = 13)	Good Images			274.139	0.232416	220.028	0.280925	97.7904	0.165517	78.3313	0.195552		1.23242	0.259424	1.28092	0.320384	1.16552	0.179215	1.19555	0.214673
		2013-06-07	588	1077.93	1309.82	362.25	ATA_SAX (N = 12)	Good Images	826.83	990.308	358.769	SAA_SAX (N = 13)	Good Images	477.891	590.817	403.143	IAA_SAX (N = 14)	Good Images	-	-	-	-	-			231.899	0.215134	163.478	0.197716	112.926	0.236301	-	-		1.21513	0.238276	1.19772	0.217262	1.2363	0.26422	-	-
		2013-06-17	602	-	-	-	-	Bad Images	761.95	874.681	447.333	SAA_SAX (N = 6)	Selected Cycles	519.152	606.876	368.471	IAA_SAX (N = 17)	Good Images	-	-	-	-	-			-	-	112.731	0.14795	87.7237	0.168975	-	-		-	-	1.14795	0.158895	1.16898	0.183251	-	-
		2013-06-17	603	-	-	-	-	Bad Images	741.49	908.169	366.444	SAA_SAX (N = 9)	Good Images	458.392	552.923	359.85	IAA_SAX (N = 20)	Good Images	402.313	478.229	383.211	RCCA_SAX (N = 19)	Good Images			-	-	166.679	0.224789	94.5307	0.206222	75.9162	0.188699		-	-	1.22479	0.250053	1.20622	0.227486	1.1887	0.206503
		2013-06-17	604	1105.85	1302.73	598.083	ATA_SAX (N = 12)	Good Images	923.367	1065.66	463.846	SAA_SAX (N = 13)	Good Images	-	-	-	-	-	-	-	-	-	Major Artifacts			196.882	0.178036	142.298	0.154107	-	-	-	-		1.17804	0.193885	1.15411	0.165982	-	-	-	-
		2013-06-24	606	1373.45	1511.58	416.1	ATA_SAX (N = 10)	WEIRD Wave!	1062.11	1168.05	447.556	SAA_SAX (N = 9)	Noisy Images	623.414	684.533	474.929	IAA_SAX (N = 14)	BIG diameter!	-	-	-	RCCA_SAX (N = 11)	BIG diameter!			138.128	0.10057	105.94	0.0997442	61.119	0.0980392	-	-		1.10057	0.105627	1.09974	0.104719	1.09804	0.102845	-	-
		2013-06-20	612	1159.96	1398.03	600.737	ATA_SAX (N = 19)	Good Images	937.745	1070.46	531.857	SAA_SAX (N = 14)	Good Images	538.588	643.046	532.727	IAA_SAX (N = 11)	Good Images	350.416	452.183	557	LCCA_SAX (N = 12)	Good Images			238.067	0.205237	132.711	0.141521	104.458	0.193948	101.768	0.29042		1.20524	0.226298	1.14152	0.151535	1.19395	0.212756	1.29042	0.332592
		mean		1179.34	1395.17	470.061	5		862.389	1011.51	423.575	7		537.591	631.79	428.903	7		370.716	454.659	496.962	4				215.823	0.186279	149.123	0.178107	94.1988	0.178677	83.9423	0.229166		1.18628	0.204702	1.17811	0.195547	1.17868	0.195432	1.22917	0.25626
		SD		115.911	90.5666	119.787			116.563	100.691	67.6736			58.7014	50.3806	63.8799			36.4887	32.6813	150.279					51.3549	0.0518041	38.8308	0.0606903	16.5797	0.0429954	11.9886	0.0472017		0.0518041	0.0602516	0.0606903	0.0723776	0.0429954	0.050085	0.0472017	0.0584727
		SEM		51.8369	40.5026	53.5705			44.0566	38.0576	25.5782			22.1871	19.0421	24.1443			18.2443	16.3406	75.1395					22.9666	0.0231675	14.6767	0.0229388	6.26655	0.0162507	5.99432	0.0236008		0.0231675	0.0269453	0.0229388	0.0273562	0.0162507	0.0189304	0.0236008	0.0292364
	t-test			0.610738	0.145045	0.873537			0.300191	0.163331	0.627941			0.334624	0.330334	0.608823			0.646828	0.962425	0.371024					0.144463	0.304283	0.827076	0.885559	0.899372	0.600983	0.180664	0.128164		0.304283	0.302948	0.885559	0.889746	0.600983	0.588559	0.128164	0.131851
Un-KO		Test Dates	Mouse #	ATA					SAA					IAA					CCA							Circumferential Displacements & Linear Strains									Circumferential Stretches & Green Strains
				Inner Diameter (µm)		HR (bpm)	Data File	Comments	Inner Diameter (µm)		HR (bpm)	Data File	Comments	Inner Diameter (µm)		HR (bpm)	Data File	Comments	Inner Diameter (µm)		HR (bpm)	Data File	Comments			ATA		SAA		IAA		CCA			ATA		SAA		IAA		CCA
				diastole	systole				diastole	systole				diastole	systole				diastole	systole						∆id (µm)	εϑ	∆id (µm)	εϑ	∆id (µm)	εϑ	∆id (µm)	εϑ		idsys/iddia	Eϑϑ	idsys/iddia	Eϑϑ	idsys/iddia	Eϑϑ	idsys/iddia	Eϑϑ
Fbln5 -/- @ 20-22 wks (Untreated)	M	2013-06-10	583	-	-	-	-	WEIRD Wave!	-	-	-	-	Noisy Images	-	-	-	-	Bad Images	346.65	412.313	496.769	RCCA_SAX (N = 13)	Good Images			-	-	-	-	-	-	65.6635	0.189423		-	-	-	-	-	-	1.18942	0.207364
		2013-06-10	591	1159.83	1320.73	338.5	ATA_SAX (N = 18)	WEIRD Wave!	768.09	975.821	325.25	SAA_SAX (N = 12)	Good Images	593.789	722.95	322.429	IAA_SAX (N = 14)	Good Images	314.918	369.88	337.111	RCCA_SAX (N = 9)	Good Images			160.905	0.138731	207.732	0.270452	129.162	0.217521	54.9621	0.174528		1.13873	0.148355	1.27045	0.307025	1.21752	0.241179	1.17453	0.189758
		2013-06-14	594	1109.17	1370.6	348.778	ATA_SAX (N = 9)	Good Images	732.401	913.389	281.583	SAA_SAX2 (N = 12)	Good Images	460.316	558.355	359.368	IAA_SAX (N = 19)	Noisy Images	306.694	373.358	357.522	RCCA_SAX (N = 23)	Good Images			261.426	0.235694	180.988	0.247116	98.0382	0.21298	66.6637	0.217362		1.23569	0.26347	1.24712	0.277649	1.21298	0.23566	1.21736	0.240985
		2013-06-20	613	1211.52	1387.64	505.333	ATA_SAX (N = 6)	Selected Cycles	801.007	899.581	463.389	SAA_SAX1 (N = 18)	Good Images	505.658	590.358	477.1	IAA_SAX (N = 20)	Good Images	347.082	393.38	490.136	RCCA_SAX (N = 22)	Noisy Images			176.128	0.145378	98.5738	0.123062	84.7002	0.167505	46.2979	0.133392		1.14538	0.155945	1.12306	0.130634	1.1675	0.181534	1.13339	0.142289
		2013-06-24	615	1051.39	1326.63	533.8	ATA_SAX (N = 10)	Good Images	833.781	933.802	645.824	SAA_SAX (N = 17)	Good Images	615.265	701.733	618.25	IAA_SAX (N = 16)	Good Images	386.196	435.366	603.333	RCCA_SAX (N = 18)	Good Images			275.243	0.261791	100.021	0.119961	86.4682	0.140538	49.1697	0.127318		1.26179	0.296058	1.11996	0.127156	1.14054	0.150414	1.12732	0.135423
		2013-06-24	619	1194.1	1287.16	500.429	ATA_SAX (N = 21)	Good Images	795.303	989.675	453.556	SAA_SAX (N = 9)	Good Images	566.369	631.563	408.25	IAA_SAX (N = 12)	Good Images	-	-	-	-	-			93.0643	0.0779369	194.371	0.244399	65.1936	0.115108	-	-		1.07794	0.080974	1.2444	0.274265	1.11511	0.121733	-	-
		mean		1145.2	1338.55	445.368	5		786.117	942.454	433.92	5		548.279	640.992	437.079	5		340.308	396.859	456.974	5				193.353	0.171906	156.337	0.200998	92.7124	0.17073	56.5514	0.168405		1.17191	0.18896	1.201	0.223346	1.17073	0.186104	1.1684	0.183164
		SD		65.3878	40.4278	93.8059			38.0406	39.0541	142.454			64.1082	70.5128	116.661			31.4896	27.4495	109.957					75.4109	0.0754697	52.924	0.0732725	23.5445	0.0446941	9.31983	0.0380464		0.0754697	0.0886305	0.0732725	0.0871659	0.0446941	0.0522671	0.0380464	0.044504
		SEM		29.2423	18.0798	41.9513			17.0123	17.4655	63.7074			28.67	31.5343	52.1725			14.0826	12.2758	49.1743					33.7248	0.0337511	23.6683	0.0327685	10.5294	0.0199878	4.16796	0.0170149		0.0337511	0.0396368	0.0327685	0.0389818	0.0199878	0.0233746	0.0170149	0.0199028
	F	2013-06-03	573	-	-	-	-	-	-	-	-	-	-	407.449	464.784	451	IAA_SAX (N = 21)	Good Images	-	-	-	-	-			-	-	-	-	57.3351	0.140717	-	-		-	-	-	-	1.14072	0.150618	-	-
		2013-06-07	589	1052.25	1264.72	489.6	ATA_SAX2 (N = 5)	Noisy Images	851.591	937.158	483	SAA_SAX2 (N = 4)	Noisy Images	581.729	643.636	458.333	IAA_SAX (N = 15)	Noisy / Good Track	395.727	473.467	491.24	RCCA_SAX2 (N = 25)	Noisy / Good Track			212.476	0.201926	85.5666	0.100478	61.9072	0.106419	77.7403	0.196449		1.20193	0.222314	1.10048	0.105526	1.10642	0.112082	1.19645	0.215745
		2013-06-07	609	992.752	1066.86	400.3	ATA_SAX2 (N = 10)	Noisy Images	827.514	927.527	413.364	SAA_SAX (N = 11)	Good Images	504.672	600.324	417.556	IAA_SAX (N = 27)	Good Images	295.575	364.98	398.783	RCCA_SAX (N = 23)	Good Images			74.1074	0.0746485	100.013	0.120859	95.6522	0.189533	69.4049	0.234813		1.07465	0.0774347	1.12086	0.128163	1.18953	0.207495	1.23481	0.262382
		2013-06-24	620	-	-	-	-	Dying Mouse	-	-	-	-	Dying Mouse	-	-	-	-	Dying Mouse	-	-	-	-	Dying Mouse			-	-	-	-	-	-	-	-		-	-	-	-	-	-	-	-
		2013-12-06	773	903.621	1042.59	320	ATA_SAX (N = 17)	Good Images	917.065	1055.57	503.8	SAA_SAX (N = 15)	Good Images	527.742	615.102	509.04	IAA_SAX (N = 25)	Good Images	347.397	433.417	521.963	RCCA_SAX (N = 27)	Good Images			138.971	0.153794	138.506	0.151032	87.3594	0.165534	86.0193	0.247611		1.15379	0.16562	1.15103	0.162437	1.16553	0.179235	1.24761	0.278266
		2015-04-30	416	-	-	-	-	Bad Images	839.958	1020.69	449	SAA_SAX (N = 4)	Selected Cycles	540.175	665.286	472.071	IAA_SAX (N = 14)	Good Images	337.637	399.3	432.565	RCCA_SAX (N = 23)	Noisy Images			-	-	180.729	0.215165	125.11	0.23161	61.6634	0.182632		-	-	1.21516	0.238312	1.23161	0.258432	1.18263	0.19931
		2015-05-14	451	1063.46	1138.36	413.312	ATA_SAX (N = 16)	WEIRD Wave!	780.75	882.558	432.5	SAA_SAX (N = 10)	Good Images	560.484	641.07	437.667	IAA_SAX (N = 9)	Good Images	321.278	418.937	424.25	LCCA_SAX (N = 12)	Noisy Images			74.9028	0.0704332	101.809	0.130398	80.5865	0.14378	97.6595	0.303972		1.07043	0.0729137	1.1304	0.1389	1.14378	0.154117	1.30397	0.350172
		mean		1003.02	1128.13	405.803	4		843.376	964.7	456.333	5		520.375	605.034	457.611	6		339.523	418.02	453.76	5				125.114	0.1252	121.325	0.143587	84.6585	0.162933	78.4975	0.233096		1.1252	0.13457	1.14359	0.154668	1.16293	0.176996	1.2331	0.261175
		SD		73.1705	99.7216	69.4521			49.2007	71.2034	36.8524			61.3486	72.4053	31.3065			37.0433	40.2369	50.9877					65.6938	0.0639255	38.5286	0.0439534	24.679	0.0435548	14.057	0.0477666		0.0639255	0.0724085	0.0439534	0.051046	0.0435548	0.0509905	0.0477666	0.0593825
		SEM		36.5852	49.8608	34.726			22.0032	31.8431	16.4809			25.0455	29.5593	12.7808			16.5662	17.9945	22.8024					32.8469	0.0319627	17.2305	0.0196566	10.0752	0.0177812	6.28647	0.0213619		0.0319627	0.0362043	0.0196566	0.0228285	0.0177812	0.0208168	0.0213619	0.0265567
	t-test			0.0221465	0.0183877	0.491149			0.0757255	0.561939	0.748621			0.483328	0.427623	0.719733			0.9721	0.363424	0.954758					0.191054	0.348725	0.269063	0.17958	0.594281	0.777624	0.0228653	0.0468536		0.348725	0.344801	0.17958	0.175805	0.777624	0.778003	0.0468536	0.0490542
Un-OLD		Test Dates	Mouse #	ATA					SAA					IAA					CCA							Circumferential Displacements & Linear Strains									Circumferential Stretches & Green Strains
				Inner Diameter (µm)		HR (bpm)	Data File	Comments	Inner Diameter (µm)		HR (bpm)	Data File	Comments	Inner Diameter (µm)		HR (bpm)	Data File	Comments	Inner Diameter (µm)		HR (bpm)	Data File	Comments			ATA		SAA		IAA		CCA			ATA		SAA		IAA		CCA
				diastole	systole				diastole	systole				diastole	systole				diastole	systole						∆id (µm)	εϑ	∆id (µm)	εϑ	∆id (µm)	εϑ	∆id (µm)	εϑ		idsys/iddia	Eϑϑ	idsys/iddia	Eϑϑ	idsys/iddia	Eϑϑ	idsys/iddia	Eϑϑ
Fbln5 +/+ @ 100-110 wks (Untreated)	M	2015-05-14	722	1459.91	1628.23	497.636	ATA_SAX2 (N = 11)	-	-	-	-	-	-	-	-	-	IAA_SAX (N = 22)	Same diam as SAA!	419.327	521.343	541.048	LCCA_SAX (N = 42)	Good Images			168.319	0.115294	-	-	-	-	102.016	0.243284		1.11529	0.12194	-	-	-	-	1.24328	0.272878
		2015-05-21	733	-	-	-	-	-	-	-	-	-	-	540.355	619.914	492.462	IAA_SAX (N = 13)	Good Images	396.866	460.837	473.9	LCCA_SAX (N = 20)	Good Images			-	-	-	-	79.5599	0.147236	63.9712	0.161191		-	-	-	-	1.14724	0.158076	1.16119	0.174182
		2015-05-14	736	1235.71	1456.46	428.727	ATA_SAX (N = 11)	Dying Mouse	850.765	961.971	459	SAA_SAX (N = 9)	Dying Mouse	-	-	-	-	Dying Mouse	342.585	417.937	442.286	LCCA_SAX (N = 7)	Dying Mouse			220.744	0.178637	111.205	0.130712	-	-	75.3522	0.219952		1.17864	0.194593	1.13071	0.139255	-	-	1.21995	0.244141
		2015-04-30	740	1443.77	1533.5	470.333	ATA_SAX (N = 12)	WEIRD Wave!	987.803	1205.35	493.571	SAA_SAX (N = 7)	Selected Cycles	650.306	766.025	479.2	IAA_SAX (N = 5)	Selected Cycles	336.043	385.727	476	LCCA_SAX (N = 9)	Small diameter			89.7208	0.0621432	217.544	0.220231	115.719	0.177945	49.6838	0.147849		1.06214	0.0640741	1.22023	0.244481	1.17794	0.193777	1.14785	0.158779
		2015-04-09	742	1412.75	1551.57	565.947	ATA_SAX2 (N = 19)	WEIRD Wave!	989.382	1196.82	474	SAA_SAX (N = 11)	-	757.332	876.778	451.667	IAA_SAX (N = 15)	Good Images	458.861	574.198	463	LCCA_SAX (N = 27)	Good Images			138.813	0.0982568	207.442	0.209668	119.446	0.157719	115.337	0.251354		1.09826	0.103084	1.20967	0.231648	1.15772	0.170157	1.25135	0.282943
		2015-05-21	747	-	-	-	ATA_SAX (N = 8)	Mismatch with LAX	1052.3	1187.33	477.667	SAA_SAX (N = 9)	Noisy Images	550.071	680.725	485.312	IAA_SAX (N = 16)	Good Images	380.208	427.057	496.519	LCCA_SAX (N = 27)	Noisy Images			-	-	135.03	0.128319	130.655	0.237523	46.8482	0.123217		-	-	1.12832	0.136551	1.23752	0.265732	1.12322	0.130808
		mean		1388.04	1542.44	490.661	4		970.063	1137.87	476.06	4		624.516	735.861	477.16	4		388.982	464.516	482.125	6				154.399	0.113583	167.805	0.172232	111.345	0.180106	75.5346	0.191141		1.11358	0.120923	1.17223	0.187984	1.18011	0.196935	1.19114	0.210622
		SD		103.42	70.5148	57.6359			85.0156	117.496	14.1953			101.539	111.432	17.8388			46.6866	70.786	33.8737					54.8381	0.0487029	52.6714	0.0495231	22.1201	0.0403442	27.9656	0.0539618		0.0487029	0.0547062	0.0495231	0.0580757	0.0403442	0.0482012	0.0539618	0.0642113
		SEM		51.7098	35.2574	28.818			42.5078	58.7478	7.09764			50.7695	55.7158	8.91942			19.0597	28.8983	13.8289					27.419	0.0243515	26.3357	0.0247616	11.0601	0.0201721	11.4169	0.0220298		0.0243515	0.0273531	0.0247616	0.0290379	0.0201721	0.0241006	0.0220298	0.0262142
	F	2014-09-16	465	1276.1	1534.95	441.789	ATA_SAX (N = 19)	Good Images	1060.3	1189.31	437	SAA_SAX (N = 9)	Good Images	706.69	803.78	461.5	IAA_SAX (N = 14)	Good Images	452.197	697.571	450	LCCA_SAX (N = 10)	Diastolic Distortion			258.85	0.202844	129.004	0.121668	97.0895	0.137386	245.375	0.542629		1.20284	0.223417	1.12167	0.129069	1.13739	0.146824	1.54263	0.689851
		2014-11-18	484	-	-	-	-	Noisy Images	979.068	1097.04	444	SAA_SAX (N = 21)	Good Images	601.616	692.909	455.444	IAA_SAX (N = 27)	Good Images	-	-	-	-	-			-	-	117.969	0.120491	91.2931	0.151747	-	-		-	-	1.12049	0.127751	1.15175	0.16326	-	-
		2014-11-18	486	1337.03	1687.38	450.233	ATA_SAX2 (N = 30)	Good Images	1093.92	1236.56	525	SAA_SAX (N = 9)	-	-	-	-	-	Noisy Images	-	-	-	-	Artifact			350.346	0.262033	142.635	0.130389	-	-	-	-		1.26203	0.296364	1.13039	0.138889	-	-	-	-
		2014-12-04	492	-	-	-	-	Noisy Images	777.841	936.273	510.2	SAA_SAX (N = 20)	Good Images	521.602	579.612	509.688	IAA_SAX (N = 16)	Good Images	364.316	496.958	519.926	LCCA_SAX (N = 27)	Noisy Images			-	-	158.432	0.203682	58.0096	0.111214	132.642	0.364085		-	-	1.20368	0.224425	1.11121	0.117398	1.36409	0.430364
		2014-09-16	495	1393.57	1544.14	524.4	ATA_SAX (N = 10)	Selected Cycles	1099.93	1225.68	509	SAA_SAX (N = 12)	Good Images	673.876	739.07	494.615	IAA_SAX (N = 13)	Good Images	508.51	638.825	532	LCCA_SAX (N = 5)	Selected Cycles			150.567	0.108044	125.749	0.114325	65.1936	0.0967442	130.315	0.256268		1.10804	0.113881	1.11432	0.12086	1.09674	0.101424	1.25627	0.289105
		2014-12-11	501	1131.16	1378.77	399.714	ATA_SAX3 (N = 7)	Noisy Images	1066.92	1157.81	491.308	SAA_SAX (N = 13)	Good Images	561.842	647.409	423.056	IAA_SAX (N = 18)	Good Images	431.509	565.247	395	LCCA_SAX (N = 19)	Noisy Images			247.613	0.218903	90.8949	0.0851939	85.5666	0.152297	133.738	0.30993		1.2189	0.242862	1.08519	0.0888229	1.1523	0.163894	1.30993	0.357959
		2014-12-04	507	1142.49	1373.36	424.545	ATA_SAX (N = 11)	Noisy Images	1005.49	1098.25	496.5	SAA_SAX N = 16)	Good Images	541.931	632.375	509.944	IAA_SAX (N = 18)	Good Images	454.402	522.97	444.318	LCCA_SAX (N = 22)	Good Images			230.87	0.202075	92.7521	0.0922453	90.444	0.166892	68.568	0.150897		1.20208	0.222493	1.09225	0.0964999	1.16689	0.180818	1.1509	0.162282
		2014-12-11	523	1495.48	1703.36	425.786	ATA_SAX (N = 14)	Good Images	1107.69	1259.04	471.4	SAA_SAX (N = 20)	Good Images	467.722	535.131	448.056	ATA_SAX (N = 18)	Good Images	556.004	638.76	433.4	LCCA_SAX (N = 5)	Selected Cycles			207.882	0.139007	151.346	0.136632	67.4089	0.144122	82.7561	0.148841		1.13901	0.148669	1.13663	0.145966	1.14412	0.154507	1.14884	0.159917
		2014-10-21	524	-	-	-	-	Dying Mouse	-	-	-	-	Dying Mouse	-	-	-	-	Dying Mouse	-	-	-	-	Dying Mouse			-	-	-	-	-	-	-	-		-	-	-	-	-	-	-	-
		2015-04-30	732	1358.6	1573.07	505.6	ATA_SAX (N = 10)	Good Images	1034.95	1147	520	ATA_SAX (N = 4)	Selected Cycles	-	-	-	-	Noisy Images	406.76	506.269	518.719	LCCA_SAX2 (N = 32)	Good Images			214.475	0.157865	112.051	0.108268	-	-	99.5088	0.244638		1.15786	0.170325	1.10827	0.114129	-	-	1.24464	0.274561
		mean		1304.92	1542.15	453.153	7		1025.12	1149.66	489.379	9		582.183	661.469	471.758	7		453.385	580.943	470.48	7				237.229	0.184396	124.537	0.123655	79.2865	0.1372	127.557	0.288184		1.1844	0.202573	1.12365	0.131823	1.1372	0.146875	1.28818	0.33772
		SD		132.598	131.197	45.4377			102.397	98.6688	32.0263			84.7473	92.1672	33.4774			63.453	78.0303	52.8088					60.9652	0.0523846	23.8685	0.0343176	15.3701	0.024769	58.0606	0.136721		0.0523846	0.0619989	0.0343176	0.039337	0.024769	0.0279976	0.136721	0.183364
		SEM		50.1172	49.5877	17.1739			34.1324	32.8896	10.6754			32.0315	34.8359	12.6533			23.983	29.4927	19.9598					23.0427	0.0197995	7.95616	0.0114392	5.80933	0.00936179	21.9449	0.0516755		0.0197995	0.0234334	0.0114392	0.0131123	0.00936179	0.0105821	0.0516755	0.069305
	t-test			0.282408	0.996303	0.312665			0.34603	0.867848	0.321245			0.509765	0.305405	0.735127			0.0598125	0.0167513	0.641563					0.0540236	0.0597842	0.199489	0.143834	0.0532383	0.120462	0.0651243	0.122067		0.0597842	0.0571901	0.143834	0.148012	0.120462	0.126712	0.122067	0.126348
Tr-WT		Test Dates	Mouse #	ATA					SAA					IAA					CCA							Circumferential Displacements & Linear Strains									Circumferential Stretches & Green Strains
				Inner Diameter (µm)		HR (bpm)	Data File	Comments	Inner Diameter (µm)		HR (bpm)	Data File	Comments	Inner Diameter (µm)		HR (bpm)	Data File	Comments	Inner Diameter (µm)		HR (bpm)	Data File	Comments			ATA		SAA		IAA		CCA			ATA		SAA		IAA		CCA
				diastole	systole				diastole	systole				diastole	systole				diastole	systole						∆id (µm)	εϑ	∆id (µm)	εϑ	∆id (µm)	εϑ	∆id (µm)	εϑ		idsys/iddia	Eϑϑ	idsys/iddia	Eϑϑ	idsys/iddia	Eϑϑ	idsys/iddia	Eϑϑ
Fbln5 +/+ @ 20-22 wks (NaCl & L-NAME)	M	2013-07-25	645	-	-	-	-	-	1023.15	1168.34	459.632	SAA_SAX (N = 19)	-	574.519	643.75	433.455	IAA_SAX (N = 22)	-	427.899	502.576	420.294	RCCA_SAX (N = 17)	-			-	-	145.186	0.141901	69.2312	0.120503	74.6771	0.174521		-	-	1.1419	0.151969	1.1205	0.127763	1.17452	0.189749
		2013-07-29	653	1144.81	1339.46	406.611	ATA_SAX (N = 18)	-	769.748	1044	484.333	SAA_SAX (N = 9)	-	479.205	558.355	467.368	IAA_SAX (N = 19)	-	321.939	398.496	493.2	RCCA_SAX (N = 10)	Poor Tracking			194.647	0.170026	274.255	0.356292	79.1497	0.165169	76.5572	0.237801		1.17003	0.18448	1.35629	0.419763	1.16517	0.178809	1.2378	0.266075
		2013-07-29	656	1262.22	1424.19	421.111	ATA_SAX (N = 9)	-	859.86	1050.1	476.333	SAA_SAX (N = 9)	-	-	-	-	-	Noisy Images	-	-	-	-	Noisy Images			161.967	0.128319	190.239	0.221245	-	-	-	-		1.12832	0.136552	1.22124	0.245719	-	-	-	-
		2013-08-26	670	-	-	-	-	Noisy Images	1047.01	1215.24	486.467	SAA_SAX (N = 15)	-	552.074	678.415	486.8	IAA_SAX (N = 10)	-	411.797	484.146	375.938	RCCA_SAX (N = 16)	-			-	-	168.232	0.160679	126.342	0.228849	72.3482	0.175689		-	-	1.16068	0.173588	1.22885	0.255035	1.17569	0.191122
		2013-12-06	779	1149.28	1371.69	479.828	ATA_SAX (N = 29)	-	773.142	970.796	480.625	SAA_SAX (N = 16)	-	469.815	540.145	480.429	IAA_SAX (N = 28)	-	369.166	457.596	528.545	RCCA_SAX2 (N = 22)	-			222.407	0.193519	197.655	0.255651	70.33	0.149697	88.4303	0.239541		1.19352	0.212244	1.25565	0.28833	1.1497	0.160902	1.23954	0.268231
		2014-08-21	182	1084.96	1322.65	308.417	ATA_SAX (N = 12)	-	945.307	1119.93	317	SAA_SAX (N = 14)	-	694.562	833.726	296.538	IAA_SAX (N = 13)	-	378.714	458.918	380.467	LCCA_SAX (N = 15)	Great Images			237.692	0.219079	174.626	0.184729	139.163	0.200361	80.204	0.21178		1.21908	0.243077	1.18473	0.201791	1.20036	0.220433	1.21178	0.234205
		2014-08-21	184	1213.3	1550.62	389.95	ATA_SAX (N = 20)	-	909.691	1125.45	400.947	SAA_SAX (N = 19)	-	447.015	553.991	405.81	IAA_SAX (N = 21)	-	372.934	421.791	390.862	LCCA_SAX (N = 29)	-			337.318	0.278016	215.756	0.237176	106.976	0.239311	48.8572	0.131008		1.27802	0.316662	1.23718	0.265302	1.23931	0.267946	1.13101	0.139589
		2014-08-12	188	1122.47	1350.86	507.643	ATA_SAX (N = 14)	-	742.367	960.443	521.316	SAA_SAX (N = 19)	-	512.986	610.048	527.448	IAA_SAX (N = 29)	-	396.717	524.389	531.143	RCCA_SAX (N = 21)	-			228.384	0.203465	218.076	0.293758	97.062	0.18921	127.673	0.321824		1.20346	0.224164	1.29376	0.336905	1.18921	0.20711	1.32182	0.373609
		2014-08-12	190	1219.4	1367.88	417.667	ATA_SAX (N = 15)	-	970.957	1082.6	421.769	SAA_SAX (N = 13)	-	519.85	601.056	407.455	IAA_SAX (N = 11)	-	374.179	448.472	407.333	LCCA_SAX (N = 9)	-			148.478	0.121762	111.647	0.114987	81.2066	0.156212	74.2923	0.198547		1.12176	0.129176	1.11499	0.121598	1.15621	0.168413	1.19855	0.218258
		2014-08-05	192	-	-	-	-	Noisy Images	965.8	1122.54	456.444	SAA_SAX (N = 9)	-	626.134	776.361	459.455	IAA_SAX (N = 11)	-	-	-	-	-	Diastolic Too Low			-	-	156.739	0.162289	150.227	0.239928	-	-		-	-	1.16229	0.175458	1.23993	0.268711	-	-
		2014-11-04	256	1238.22	1456.13	395.818	ATA_SAX (N = 11)	-	869.069	989.32	486.273	SAA_SAX (N = 22)	-	453.782	521.549	483.684	IAA_SAX (N = 19)	-	416.169	461.706	420.8	RCCA_SAX (N = 15)	-			217.917	0.175993	120.25	0.138367	67.767	0.149338	45.5367	0.109419		1.17599	0.19148	1.13837	0.147939	1.14934	0.160489	1.10942	0.115405
		2014-11-11	257	1068.48	1403.56	508.2	ATA_SAX (N = 15)	-	874.816	1034.54	384.5	SAA_SAX (N = 20)	-	412.553	499.393	423.25	IAA_SAX (N = 32)	-	298.712	368.134	516.4	LCCA_SAX (N = 20)	-			335.07	0.313594	159.724	0.18258	86.8399	0.210494	69.4219	0.232404		1.31359	0.362764	1.18258	0.199248	1.21049	0.232648	1.2324	0.259409
		mean		1167.02	1398.56	426.138	9		895.909	1073.61	447.97	12		522.045	619.708	442.881	11		376.823	452.622	446.498	10				231.542	0.200419	177.699	0.204138	97.6631	0.186279	75.7998	0.203253		1.20042	0.222289	1.20414	0.227301	1.18628	0.204387	1.20325	0.225565
		SD		69.1504	70.9876	64.0559			99.6339	79.6455	57.0556			84.3681	106.458	61.2774			40.7889	46.9303	63.4902					66.4504	0.0633844	45.2658	0.0712542	29.2827	0.0408353	22.5294	0.0606662		0.0633844	0.0771168	0.0712542	0.0877596	0.0408353	0.0484187	0.0606662	0.073521
		SEM		23.0501	23.6625	21.352			28.7618	22.9917	16.4705			25.438	32.0984	18.4758			12.8986	14.8407	20.0774					22.1501	0.0211281	13.0671	0.0205693	8.82906	0.0123123	7.12444	0.0191843		0.0211281	0.0257056	0.0205693	0.025334	0.0123123	0.0145988	0.0191843	0.0232494
	F	2013-07-25	641	1254.94	1407.14	447	ATA_SAX (N = 10)	-	731.371	905.419	553.368	SAA_SAX (N = 19)	-	-	-	-	-	Noisy Images	-	-	-	-	-			152.204	0.121284	174.048	0.237975	-	-	-	-		1.12128	0.128639	1.23797	0.266291	-	-	-	-
		2013-08-08	663	1221.58	1403.33	526	ATA_SAX (N = 9)	-	934.385	1067.9	592.348	SAA_SAX (N = 23)	-	427.411	547.963	586.759	IAA_SAX (N = 29)	-	363.726	430.821	544.7	RCCA_SAX (N = 30)	-			181.755	0.148787	133.513	0.142889	120.552	0.282051	67.0951	0.184466		1.14879	0.159856	1.14289	0.153097	1.28205	0.321828	1.18447	0.20148
		2013-08-09	668	-	-	-	-	Too Large Diameter	914.34	1040.31	438.467	SAA_SAX (N = 15)	-	486.236	565.917	486	IAA_SAX (N = 9)	-	-	-	-	-	-			-	-	125.967	0.137768	79.6811	0.163873	-	-		-	-	1.13777	0.147258	1.16387	0.177301	-	-
		2013-08-26	673	1084.68	1493.01	433.556	ATA_SAX (N = 9)	-	857.475	995.199	532.25	SAA_SAX (N = 20)	-	546.611	632.811	526.75	IAA_SAX (N = 28)	-	-	-	-	-	-			408.329	0.376452	137.724	0.160616	86.1998	0.157698	-	-		1.37645	0.44731	1.16062	0.173515	1.1577	0.170133	-	-
		2013-08-26	675	1093.88	1268.33	381.381	ATA_SAX (N = 21)	-	873.387	981.202	504.667	SAA_SAX (N = 9)	-	477.752	547.432	510.818	IAA_SAX (N = 22)	-	333.636	385.936	431.083	RCCA_SAX (N = 24)	-			174.447	0.159475	107.814	0.123444	69.6799	0.145849	52.3006	0.15676		1.15948	0.172192	1.12344	0.131063	1.14585	0.156486	1.15676	0.169046
		2013-12-12	790	892.909	1201.45	662.182	ATA_SAX (N = 11)	-	893.273	1062.75	455.667	SAA_SAX (N = 18)	-	569.19	681.398	431	IAA_SAX (N = 13)	-	289.563	378.377	725.217	RCCA_SAX (N = 23)	-			308.543	0.345548	169.475	0.189723	112.208	0.197137	88.8148	0.306721		1.34555	0.405249	1.18972	0.207721	1.19714	0.216568	1.30672	0.35376
		2014-08-19	195	1131.27	1428.58	427.214	ATA_SAX (N = 14)	-	866.222	1055.49	410.778	SAA_SAX (N = 18)	-	593.901	688.563	411.111	IAA_SAX (N = 9)	-	382.363	490.465	427.944	LCCA_SAX (N = 18)	-			297.314	0.262815	189.272	0.218503	94.6612	0.159389	108.102	0.282722		1.26282	0.297351	1.2185	0.242375	1.15939	0.172091	1.28272	0.322688
		2014-08-26	199	-	-	-	-	-	914.132	1090.74	454.615	SAA_SAX (N = 13)	-	496.204	522.667	434.167	IAA_SAX (N = 24)	Weird Wave	338.835	405.242	381.579	LCCA_SAX (N = 19)	-			-	-	176.607	0.193197	26.4627	0.0533303	66.4066	0.195985		-	-	1.1932	0.211859	1.05333	0.0547523	1.19599	0.21519
		2014-11-04	240	1192.72	1412.76	486.13	ATA_SAX (N = 23)	-	978.383	1127.34	511.176	SAA_SAX (N = 17)	-	623.903	699.582	519.8	IAA_SAX (N = 20)	-	388.309	425.707	519.25	LCCA_SAX (N = 20)	-			220.039	0.184485	148.956	0.152247	75.6791	0.121299	37.3981	0.0963102		1.18449	0.201503	1.15225	0.163836	1.1213	0.128656	1.09631	0.100948
		2014-11-11	250	1097.23	1347.12	478.857	ATA_SAX (N = 21)	-	848.955	1008.07	513.471	SAA_SAX (N = 17)	-	425.261	523.408	502.235	IAA_SAX (N = 17)	-	334.145	409.343	512.32	LCCA_SAX (N = 25)	-			249.889	0.227745	159.117	0.187427	98.1468	0.230792	75.1974	0.225044		1.22774	0.253679	1.18743	0.204991	1.23079	0.257424	1.22504	0.250366
		mean		1121.15	1370.21	480.29	8		881.192	1033.44	496.681	10		516.274	601.082	489.849	9		347.225	417.985	506.013	7				249.065	0.228324	152.249	0.174379	84.8078	0.167935	70.7593	0.206858		1.22832	0.258222	1.17438	0.190201	1.16794	0.183915	1.20686	0.230497
		SD		112.09	94.2261	85.4422			65.7761	63.1613	56.1808			70.9748	74.104	55.9258			34.0244	37.2172	113.251					85.8191	0.0935941	25.8653	0.0370536	27.4955	0.0650168	23.1886	0.072352		0.0935941	0.117114	0.0370536	0.0437138	0.0650168	0.0761184	0.072352	0.0872954
		SEM		39.6297	33.314	30.2084			20.8002	19.9733	17.7659			23.6583	24.7013	18.6419			12.86	14.0668	42.805					30.3416	0.0330905	8.17933	0.0117174	9.16515	0.0216723	8.76446	0.0273465		0.0330905	0.0414059	0.0117174	0.0138235	0.0216723	0.0253728	0.0273465	0.0329946
	t-test			0.337858	0.500151	0.167137			0.683031	0.202144	0.0584712			0.869923	0.651233	0.0906209			0.125824	0.11139	0.241011					0.648514	0.490695	0.116161	0.225618	0.326103	0.474913	0.662851	0.91592		0.490695	0.475234	0.225618	0.216135	0.474913	0.496631	0.91592	0.904859
Tr-KO		Test Dates	Mouse #	ATA					SAA					IAA					CCA							Circumferential Displacements & Linear Strains									Circumferential Stretches & Green Strains
				Inner Diameter (µm)		HR (bpm)	Data File	Comments	Inner Diameter (µm)		HR (bpm)	Data File	Comments	Inner Diameter (µm)		HR (bpm)	Data File	Comments	Inner Diameter (µm)		HR (bpm)	Data File	Comments			ATA		SAA		IAA		CCA			ATA		SAA		IAA		CCA
				diastole	systole				diastole	systole				diastole	systole				diastole	systole						∆id (µm)	εϑ	∆id (µm)	εϑ	∆id (µm)	εϑ	∆id (µm)	εϑ		idsys/iddia	Eϑϑ	idsys/iddia	Eϑϑ	idsys/iddia	Eϑϑ	idsys/iddia	Eϑϑ
Fbln5 -/- @ 20-22 wks (NaCl & L-NAME)	M	2013-08-16	678	-	-	-	-	Bad Images	802.456	948.183	462.588	SAA_SAX1 (N = 17)	-	478.268	659.824	443.444	IAA_SAX (N = 9)	-	322.52	374.285	492.062	RCCA_SAX (N = 16)	-			-	-	145.727	0.181601	181.556	0.379612	51.7653	0.160503		-	-	1.1816	0.19809	1.37961	0.451664	1.1605	0.173383
		2013-08-16	679	982.793	1108.83	337.067	ATA_SAX (N = 15)	-	836.354	929.009	465.214	SAA_SAX (N = 14)	-	524.265	692.394	387	IAA_SAX (N = 3)	Selected Cycles	368.196	483.722	380.091	RCCA_SAX (N = 11)	-			126.041	0.128248	92.6543	0.110784	168.129	0.320694	115.526	0.313764		1.12825	0.136471	1.11078	0.11692	1.32069	0.372116	1.31376	0.362987
		2013-12-06	780	799.204	1002.93	532.571	ATA_SAX2 (N = 14)	Good Images	735.692	847.969	520.333	SAA_SAX (N = 18)	-	461.073	531.842	454.737	IAA_SAX (N = 19)	-	250.212	337.185	591.231	RCCA_SAX (N = 26)	Small Diameter			203.728	0.254913	112.278	0.152615	70.7694	0.153488	86.9731	0.347597		1.25491	0.287404	1.15262	0.164261	1.15349	0.165268	1.3476	0.408009
		2013-12-12	787	1108.73	1225.25	539	ATA_SAX2 (N = 22)	-	832.051	933.752	581.1	SAA_SAX (N = 10)	-	456.355	525.623	566.625	IAA_SAX (N = 8)	Selected Cycles	-	-	-	-	Noisy Images			116.519	0.105092	101.701	0.12223	69.2682	0.151786	-	-		1.10509	0.110614	1.12223	0.1297	1.15179	0.163305	-	-
		2014-08-14	181	935.688	1171.67	447.6	ATA_SAX (N = 5)	Selected Cycles	809.103	940.418	548.933	SAA_SAX (N = 15)	-	-	-	-	-	Diameter Too Large	325.968	396.051	540.4	LCCA_SAX (N = 5)	Selected Cycles			235.983	0.252202	131.315	0.162297	-	-	70.0831	0.215		1.2522	0.284005	1.1623	0.175467	-	-	1.215	0.238113
		mean		956.605	1127.17	464.06	4		803.131	919.866	515.634	5		479.99	602.421	462.952	4		316.724	397.811	500.946	4				170.568	0.185114	116.735	0.145905	122.431	0.251395	81.087	0.259216		1.18511	0.204624	1.14591	0.156888	1.25139	0.288088	1.25922	0.295623
		SD		127.857	95.52	94.354			40.3868	40.8343	51.8959			30.9823	86.1577	75.1994			48.9632	62.2166	90.1717					58.5451	0.0796033	21.6729	0.0290774	60.7708	0.116547	27.0897	0.0865757		0.0796033	0.0942275	0.0290774	0.0332935	0.116547	0.146599	0.0865757	0.108656
		SEM		63.9283	47.76	47.177			18.0615	18.2617	23.2085			15.4911	43.0788	37.5997			24.4816	31.1083	45.0859					29.2725	0.0398017	9.69242	0.0130038	30.3854	0.0582735	13.5449	0.0432879		0.0398017	0.0471138	0.0130038	0.0148893	0.0582735	0.0732993	0.0432879	0.0543282
	F	2013-07-25	639	949.505	1132.72	480.667	ATA_SAX (N = 9)	-	670.644	708.98	535.882	SAA_SAX (N = 17)	-	399.311	453.639	490.333	IAA_SAX (N = 3)	Selected Cycles	387.911	432.036	637.478	RCCA_SAX (N = 23)	-			183.215	0.192959	38.3366	0.0571639	54.328	0.136054	44.1245	0.113749		1.19296	0.211575	1.05716	0.0587978	1.13605	0.14531	1.11375	0.120218
		2013-07-25	640	1143.03	1313.8	481.333	ATA_SAX (N = 12)	-	793.436	886.04	475	SAA_SAX (N = 11)	-	483.741	620.915	503.769	IAA_SAX (N = 39)	Great Images!	327.598	396.051	502	RCCA_SAX (N = 10)	Small Diameter			170.768	0.149399	92.6045	0.116713	137.174	0.283568	68.4533	0.208955		1.1494	0.160559	1.11671	0.123524	1.28357	0.323774	1.20896	0.230786
		2013-08-08	662	-	-	-	-	Noisy Images	797.054	919.933	457.6	SAA_SAX (N = 10)	Noisy Images	418.798	494.797	426.826	IAA_SAX (N = 23)	-	332.487	398.496	473	RCCA_SAX (N = 20)	-			-	-	122.879	0.154167	75.999	0.181469	66.0085	0.198529		-	-	1.15417	0.16605	1.18147	0.197935	1.19853	0.218236
		2013-08-09	667	-	-	-	-	NO Images	818.994	907.957	410.25	SAA_SAX (N = 12)	-	378.678	460.229	360.192	IAA_SAX (N = 26)	-	315.374	400.126	346.2	RCCA_SAX (N = 10)	-			-	-	88.9621	0.108624	81.5511	0.215357	84.7517	0.268734		-	-	1.10862	0.114523	1.21536	0.238547	1.26873	0.304843
		2014-08-05	193	1072.71	1314.3	417.708	ATA_SAX (N = 24)	-	717.178	840.421	543.067	SAA_SAX (N = 15)	-	570.065	744.501	530.615	IAA_ SAX (N = 13)	Large Diameter	351.58	428.388	565.571	LCCA_SAX (N = 14)	-			241.585	0.225209	123.243	0.171845	174.435	0.305992	76.8088	0.218468		1.22521	0.250568	1.17184	0.18661	1.30599	0.352808	1.21847	0.242332
		2014-08-26	198	1068.69	1241.22	375.167	ATA_SAX (N = 12)	-	795.704	946.15	478.409	SAA_SAX (N = 22)	-	421.866	474.125	481.286	IAA_SAX (N = 21)	-	-	-	-	-	Noisy Images			172.525	0.161436	150.447	0.189074	52.2589	0.123876	-	-		1.16144	0.174466	1.18907	0.206948	1.12388	0.131548	-	-
		2014-11-04	241	855.81	1098.09	302.667	ATA_SAX (N = 12)	Different Session	774.846	852.085	501.533	SAA_SAX (N = 15)	-	594.237	714.07	514.455	IAA_SAX (N = 11)	Large Diameter	348.143	422.96	494.091	LCCA_SAX (N = 11)	-			242.281	0.283101	77.239	0.0996831	119.833	0.201658	74.8176	0.214905		1.2831	0.323175	1.09968	0.104651	1.20166	0.221991	1.21491	0.237997
		2014-11-11	251	925.028	1065.91	396.917	ATA_SAX1 (N = 12)	-	693.144	868.297	511.3	SAA_SAX (N = 20)	-	380.568	456.763	508.6	IAA_SAX (N = 20)	-	311.74	367.76	475.214	LCCA_SAX (N = 14)	Small Diameter			140.879	0.152297	175.153	0.252694	76.195	0.200214	56.0201	0.179701		1.1523	0.163895	1.25269	0.284621	1.20021	0.220257	1.1797	0.195848
		mean		1002.46	1194.34	409.076	6		757.625	866.233	489.13	8		455.908	552.38	477.01	8		339.262	406.545	499.079	7				191.875	0.194067	108.608	0.143745	96.4717	0.206024	67.2835	0.200434		1.19407	0.21404	1.14375	0.155716	1.20602	0.229021	1.20043	0.221466
		SD		108.985	109.922	67.8845			55.6896	72.7057	43.5416			84.7866	122.226	56.5056			26.1642	22.7918	89.6573					41.2488	0.0523507	43.3602	0.0612078	43.2013	0.0636886	13.6555	0.0469394		0.0523507	0.0635479	0.0612078	0.0707474	0.0636886	0.0774532	0.0469394	0.0557749
		SEM		44.4931	44.8754	27.7137			19.6893	25.7053	15.3943			29.9766	43.2135	19.9778			9.88915	8.61449	33.8873					16.8398	0.0213721	15.3301	0.0216402	15.274	0.0225173	5.16128	0.0177414		0.0213721	0.0259433	0.0216402	0.025013	0.0225173	0.0273838	0.0177414	0.0210809
	t-test			0.578218	0.3384	0.360502			0.117633	0.117113	0.371048			0.492335	0.434753	0.755273			0.441372	0.802034	0.974614					0.555852	0.851119	0.663014	0.933422	0.4827	0.508618	0.396243	0.276757		0.851119	0.868128	0.933422	0.968639	0.508618	0.493721	0.276757	0.273306
		t-tests		ATA					SAA					IAA					CCA							Circumferential Displacements & Linear Strains									Circumferential Stretches & Green Strains
				Inner Diameter (µm)		HR (bpm)	Comments		Inner Diameter (µm)		HR (bpm)	Comments		Inner Diameter (µm)		HR (bpm)	Comments		Inner Diameter (µm)		HR (bpm)	Comments				ATA		SAA		IAA		CCA			ATA		SAA		IAA		CCA
				diastole	systole				diastole	systole				diastole	systole				diastole	systole						∆id (µm)	εϑ	∆id (µm)	εϑ	∆id (µm)	εϑ	∆id (µm)	εϑ		idsys/iddia	Eϑϑ	idsys/iddia	Eϑϑ	idsys/iddia	Eϑϑ	idsys/iddia	Eϑϑ
	M	Un-WT vs Un-KO		0.151658	0.00579807	0.934625			0.0351074	0.0108144	0.881152			0.526339	0.523747	0.63103			0.203347	0.199126	0.499019					0.115477	0.266973	0.99797	0.563006	0.83665	0.88771	0.439069	0.958573		0.266973	0.275853	0.563006	0.557252	0.88771	0.876595	0.958573	0.953012
		Un-WT vs Un-OLD		0.0329343	0.177192	0.697329			0.530564	0.476458	0.433181			0.443695	0.360726	0.132402			0.954731	0.799859	0.13113					0.0196236	0.0150513	0.770159	0.99224	0.277978	0.617019	0.53932	0.534979		0.0150513	0.013804	0.99224	0.993733	0.617019	0.616201	0.534979	0.531969
		Un-WT vs Tr-WT		0.268591	0.0615006	0.769794			0.530056	0.752893	0.944127			0.200739	0.282146	0.403956			0.757423	0.996723	0.444418					0.284506	0.524054	0.511679	0.460849	0.847637	0.32443	0.444583	0.312306		0.524054	0.550357	0.460849	0.453358	0.32443	0.317206	0.312306	0.306504
		Un-KO vs Tr-KO		0.0517034	0.015463	0.77634			0.512322	0.397532	0.281627			0.0810108	0.497981	0.699818			0.442413	0.978685	0.530973					0.62558	0.808147	0.178875	0.176334	0.411323	0.26563	0.166981	0.123908		0.808147	0.807213	0.176334	0.170505	0.26563	0.262573	0.123908	0.127429
	F	Un-WT vs Un-KO		0.0283794	0.00549371	0.349992			0.708839	0.367737	0.308131			0.617512	0.466689	0.32075			0.248347	0.175551	0.61491					0.0670655	0.174607	0.251155	0.279824	0.443136	0.527218	0.550836	0.905433		0.174607	0.172114	0.279824	0.277966	0.527218	0.526255	0.905433	0.904669
		Un-WT vs Un-OLD		0.113914	0.0445837	0.776257			0.0127472	0.0167394	0.0446255			0.27746	0.473212	0.150129			0.0228216	0.00494853	0.753209					0.525997	0.952118	0.17339	0.0627958	0.106635	0.0525365	0.0976182	0.329017		0.952118	0.953773	0.0627958	0.0660075	0.0525365	0.0506722	0.329017	0.311045
		Un-WT vs Tr-WT		0.397295	0.645681	0.872901			0.708819	0.621801	0.037886			0.521759	0.341756	0.0687613			0.333248	0.131942	0.920706					0.401026	0.320385	0.856248	0.888048	0.412565	0.697794	0.245816	0.552753		0.320385	0.302242	0.888048	0.865356	0.697794	0.721548	0.552753	0.574012
		Un-KO vs Tr-KO		0.99254	0.356314	0.943497			0.0165559	0.040147	0.177215			0.124781	0.335178	0.430359			0.989594	0.586629	0.293984					0.13545	0.126897	0.594163	0.995765	0.531313	0.159089	0.202772	0.270799		0.126897	0.125201	0.995765	0.975886	0.159089	0.15657	0.270799	0.273676
Un-WT		Test Dates	Mouse #	ATA					SAA					IAA					CCA							Circumferential Displacements & Linear Strains									Circumferential Stretches & Green Strains
				Inner Diameter (µm)		HR (bpm)	Data File	Comments	Inner Diameter (µm)		HR (bpm)	Data File	Comments	Inner Diameter (µm)		HR (bpm)	Data File	Comments	Inner Diameter (µm)		HR (bpm)	Data File	Comments			ATA		SAA		IAA		CCA			ATA		SAA		IAA		CCA
				diastole	systole				diastole	systole				diastole	systole				diastole	systole						∆id (µm)	εϑ	∆id (µm)	εϑ	∆id (µm)	εϑ	∆id (µm)	εϑ		idsys/iddia	Eϑϑ	idsys/iddia	Eϑϑ	idsys/iddia	Eϑϑ	idsys/iddia	Eϑϑ
Lmna +/+ @ 20 wks	M																									-	-	0	#DIV/0!	0	#DIV/0!	0	#DIV/0!		-	-	#DIV/0!	#DIV/0!	#DIV/0!	#DIV/0!	#DIV/0!	#DIV/0!
																										0	#DIV/0!	0	#DIV/0!	0	#DIV/0!	0	#DIV/0!		#DIV/0!	#DIV/0!	#DIV/0!	#DIV/0!	#DIV/0!	#DIV/0!	#DIV/0!	#DIV/0!
																										0	#DIV/0!	0	#DIV/0!	0	#DIV/0!	0	#DIV/0!		#DIV/0!	#DIV/0!	#DIV/0!	#DIV/0!	#DIV/0!	#DIV/0!	#DIV/0!	#DIV/0!
																										0	#DIV/0!	0	#DIV/0!	0	#DIV/0!	-	-		#DIV/0!	#DIV/0!	#DIV/0!	#DIV/0!	#DIV/0!	#DIV/0!	-	-
																										0	#DIV/0!	0	#DIV/0!	-	-	0	#DIV/0!		#DIV/0!	#DIV/0!	#DIV/0!	#DIV/0!	-	-	#DIV/0!	#DIV/0!
		mean		#DIV/0!	#DIV/0!	#DIV/0!	0		#DIV/0!	#DIV/0!	#DIV/0!	0		#DIV/0!	#DIV/0!	#DIV/0!	0		#DIV/0!	#DIV/0!	#DIV/0!	0				0	#DIV/0!	0	#DIV/0!	0	#DIV/0!	0	#DIV/0!		#DIV/0!	#DIV/0!	#DIV/0!	#DIV/0!	#DIV/0!	#DIV/0!	#DIV/0!	#DIV/0!
		SD		#DIV/0!	#DIV/0!	#DIV/0!			#DIV/0!	#DIV/0!	#DIV/0!			#DIV/0!	#DIV/0!	#DIV/0!			#DIV/0!	#DIV/0!	#DIV/0!					0	#DIV/0!	0	#DIV/0!	0	#DIV/0!	0	#DIV/0!		#DIV/0!	#DIV/0!	#DIV/0!	#DIV/0!	#DIV/0!	#DIV/0!	#DIV/0!	#DIV/0!
		SEM		#DIV/0!	#DIV/0!	#DIV/0!			#DIV/0!	#DIV/0!	#DIV/0!			#DIV/0!	#DIV/0!	#DIV/0!			#DIV/0!	#DIV/0!	#DIV/0!					0	#DIV/0!	0	#DIV/0!	0	#DIV/0!	0	#DIV/0!		#DIV/0!	#DIV/0!	#DIV/0!	#DIV/0!	#DIV/0!	#DIV/0!	#DIV/0!	#DIV/0!
	F	2018-12-07	P165																							0	#DIV/0!	0	#DIV/0!	0	#DIV/0!	0	#DIV/0!		#DIV/0!	#DIV/0!	#DIV/0!	#DIV/0!	#DIV/0!	#DIV/0!	#DIV/0!	#DIV/0!
		2018-12-07	P166																							0	#DIV/0!	0	#DIV/0!	-	-	0	#DIV/0!		#DIV/0!	#DIV/0!	#DIV/0!	#DIV/0!	-	-	#DIV/0!	#DIV/0!
		2019-03-08	P1120																							0	#DIV/0!	0	#DIV/0!	0	#DIV/0!	0	#DIV/0!		#DIV/0!	#DIV/0!	#DIV/0!	#DIV/0!	#DIV/0!	#DIV/0!	#DIV/0!	#DIV/0!
																										0	#DIV/0!	0	#DIV/0!	0	#DIV/0!	0	#DIV/0!		#DIV/0!	#DIV/0!	#DIV/0!	#DIV/0!	#DIV/0!	#DIV/0!	#DIV/0!	#DIV/0!
																										0	#DIV/0!	0	#DIV/0!	0	#DIV/0!	0	#DIV/0!		#DIV/0!	#DIV/0!	#DIV/0!	#DIV/0!	#DIV/0!	#DIV/0!	#DIV/0!	#DIV/0!
		mean		#DIV/0!	#DIV/0!	#DIV/0!	0		#DIV/0!	#DIV/0!	#DIV/0!	0		#DIV/0!	#DIV/0!	#DIV/0!	0		#DIV/0!	#DIV/0!	#DIV/0!	0				0	#DIV/0!	0	#DIV/0!	0	#DIV/0!	0	#DIV/0!		#DIV/0!	#DIV/0!	#DIV/0!	#DIV/0!	#DIV/0!	#DIV/0!	#DIV/0!	#DIV/0!
		SD		#DIV/0!	#DIV/0!	#DIV/0!			#DIV/0!	#DIV/0!	#DIV/0!			#DIV/0!	#DIV/0!	#DIV/0!			#DIV/0!	#DIV/0!	#DIV/0!					0	#DIV/0!	0	#DIV/0!	0	#DIV/0!	0	#DIV/0!		#DIV/0!	#DIV/0!	#DIV/0!	#DIV/0!	#DIV/0!	#DIV/0!	#DIV/0!	#DIV/0!
		SEM		#DIV/0!	#DIV/0!	#DIV/0!			#DIV/0!	#DIV/0!	#DIV/0!			#DIV/0!	#DIV/0!	#DIV/0!			#DIV/0!	#DIV/0!	#DIV/0!					0	#DIV/0!	0	#DIV/0!	0	#DIV/0!	0	#DIV/0!		#DIV/0!	#DIV/0!	#DIV/0!	#DIV/0!	#DIV/0!	#DIV/0!	#DIV/0!	#DIV/0!
	t-test			#REF!	#REF!	#REF!			#DIV/0!	#DIV/0!	#DIV/0!			#REF!	#REF!	#REF!			#DIV/0!	#DIV/0!	#DIV/0!					#REF!	#REF!	#REF!	#REF!	#REF!	#REF!	#REF!	#REF!		#REF!	#REF!	#REF!	#REF!	#REF!	#REF!	#REF!	#REF!
Un-WT		Test Dates	Mouse #	ATA					SAA					IAA					CCA							Circumferential Displacements & Linear Strains									Circumferential Stretches & Green Strains
				Inner Diameter (µm)		HR (bpm)	Data File	Comments	Inner Diameter (µm)		HR (bpm)	Data File	Comments	Inner Diameter (µm)		HR (bpm)	Data File	Comments	Inner Diameter (µm)		HR (bpm)	Data File	Comments			ATA		SAA		IAA		CCA			ATA		SAA		IAA		CCA
				diastole	systole				diastole	systole				diastole	systole				diastole	systole						∆id (µm)	εϑ	∆id (µm)	εϑ	∆id (µm)	εϑ	∆id (µm)	εϑ		idsys/iddia	Eϑϑ	idsys/iddia	Eϑϑ	idsys/iddia	Eϑϑ	idsys/iddia	Eϑϑ
Lmna G609G/G609G @ 20 wks	M																									-	-			0	#DIV/0!	0	#DIV/0!		-	-	#DIV/0!	#DIV/0!	#DIV/0!	#DIV/0!	#DIV/0!	#DIV/0!
																										0	#DIV/0!			0	#DIV/0!	0	#DIV/0!		#DIV/0!	#DIV/0!	#DIV/0!	#DIV/0!	#DIV/0!	#DIV/0!	#DIV/0!	#DIV/0!
																										0	#DIV/0!			0	#DIV/0!	0	#DIV/0!		#DIV/0!	#DIV/0!	#DIV/0!	#DIV/0!	#DIV/0!	#DIV/0!	#DIV/0!	#DIV/0!
																										0	#DIV/0!			0	#DIV/0!	-	-		#DIV/0!	#DIV/0!	#DIV/0!	#DIV/0!	#DIV/0!	#DIV/0!	-	-
																										0	#DIV/0!			-	-	0	#DIV/0!		#DIV/0!	#DIV/0!	#DIV/0!	#DIV/0!	-	-	#DIV/0!	#DIV/0!
		mean		#DIV/0!	#DIV/0!	#DIV/0!	0		#DIV/0!	#DIV/0!	#DIV/0!	0		#DIV/0!	#DIV/0!	#DIV/0!	0		#DIV/0!	#DIV/0!	#DIV/0!	0				0	#DIV/0!	#DIV/0!	#DIV/0!	0	#DIV/0!	0	#DIV/0!		#DIV/0!	#DIV/0!	#DIV/0!	#DIV/0!	#DIV/0!	#DIV/0!	#DIV/0!	#DIV/0!
		SD		#DIV/0!	#DIV/0!	#DIV/0!			#DIV/0!	#DIV/0!	#DIV/0!			#DIV/0!	#DIV/0!	#DIV/0!			#DIV/0!	#DIV/0!	#DIV/0!					0	#DIV/0!	#DIV/0!	#DIV/0!	0	#DIV/0!	0	#DIV/0!		#DIV/0!	#DIV/0!	#DIV/0!	#DIV/0!	#DIV/0!	#DIV/0!	#DIV/0!	#DIV/0!
		SEM		#DIV/0!	#DIV/0!	#DIV/0!			#DIV/0!	#DIV/0!	#DIV/0!			#DIV/0!	#DIV/0!	#DIV/0!			#DIV/0!	#DIV/0!	#DIV/0!					0	#DIV/0!	#DIV/0!	#DIV/0!	0	#DIV/0!	0	#DIV/0!		#DIV/0!	#DIV/0!	#DIV/0!	#DIV/0!	#DIV/0!	#DIV/0!	#DIV/0!	#DIV/0!
	F	2017-12-08	P91	915.238	1097.34	507								430.359	482.744	564										182.106	0.198971			52.3859	0.121726				1.19897	0.218766	#DIV/0!	#DIV/0!	1.12173	0.129135	#DIV/0!	#DIV/0!
		2017-12-08	P92	-	-	-								-	-	-		Bad signal																	#VALUE!	#VALUE!	#DIV/0!	#DIV/0!	-	-	#DIV/0!	#DIV/0!
		2017-12-08	P98	849.09	1024.07	426								410.441	606.404	436										174.985	0.206085			195.963	0.477444				1.20609	0.227321	#DIV/0!	#DIV/0!	1.47744	0.59142	#DIV/0!	#DIV/0!
		2018-01-04	P110	857.577	1057.6	450								379.461	432.94	459										200.023	0.233241			53.4788	0.140933				1.23324	0.260442	#DIV/0!	#DIV/0!	1.14093	0.150864	#DIV/0!	#DIV/0!
		2018-01-04	P115	913.774	1109.37	626								362.765	445.86	410										195.594	0.21405			83.0949	0.22906				1.21405	0.236959	#DIV/0!	#DIV/0!	1.22906	0.255294	#DIV/0!	#DIV/0!
		mean		883.92	1072.1	502.25	4		#DIV/0!	#DIV/0!	#DIV/0!	0		395.757	491.987	467.25	4		#DIV/0!	#DIV/0!	#DIV/0!	0				188.177	0.213087	#DIV/0!	#DIV/0!	96.2305	0.242291	#DIV/0!	#DIV/0!		#VALUE!	#VALUE!	#DIV/0!	#DIV/0!	1.24229	0.281678	#DIV/0!	#DIV/0!
		SD		35.4926	38.9138	89.2202			#DIV/0!	#DIV/0!	#DIV/0!			30.3695	79.1431	67.5346			#DIV/0!	#DIV/0!	#DIV/0!					11.6364	0.0147808	#DIV/0!	#DIV/0!	67.9929	0.163586	#DIV/0!	#DIV/0!		#VALUE!	#VALUE!	#DIV/0!	#DIV/0!	0.163586	0.213711	#DIV/0!	#DIV/0!
		SEM		17.7463	19.4569	44.6101			#DIV/0!	#DIV/0!	#DIV/0!			15.1848	39.5716	33.7673			#DIV/0!	#DIV/0!	#DIV/0!					5.81822	0.00739041	#DIV/0!	#DIV/0!	33.9964	0.0817929	#DIV/0!	#DIV/0!		#VALUE!	#VALUE!	#DIV/0!	#DIV/0!	0.0817929	0.106856	#DIV/0!	#DIV/0!
	t-test			0.00314389	0.000475919	0.658293			#DIV/0!	#DIV/0!	#DIV/0!			0.000511719	0.0289435	0.390901			#DIV/0!	#DIV/0!	#DIV/0!					0.301282	0.322567	#DIV/0!	#DIV/0!	0.956607	0.497292	#DIV/0!	#DIV/0!		#VALUE!	#VALUE!	#DIV/0!	#DIV/0!	0.497292	0.481654	#DIV/0!	#DIV/0!

## Sheet: M-Mode LAX
Un-WT		Test Dates	Mouse #	ATA					SAA					IAA					CCA							Circumferential Displacements & Linear Strains									Circumferential Stretches & Green Strains
				Inner Diameter (µm)		HR (bpm)	Data File	Comments	Inner Diameter (µm)		HR (bpm)	Data File	Comments	Inner Diameter (µm)		HR (bpm)	Data File	Comments	Inner Diameter (µm)		HR (bpm)	Data File	Comments			ATA		SAA		IAA		CCA			ATA		SAA		IAA		CCA
				diastole	systole				diastole	systole				diastole	systole				diastole	systole						∆id (µm)	εϑ	∆id (µm)	εϑ	∆id (µm)	εϑ	∆id (µm)	εϑ		idsys/iddia	Eϑϑ	idsys/iddia	Eϑϑ	idsys/iddia	Eϑϑ	idsys/iddia	Eϑϑ
Fbln5 +/+ @ 20-22 wks (Untreated)	M	2013-06-14	577	-	-	-	-	No ECG Signal	-	-	-	-	-	530.324	604.383	365.357	IAA_LAX (N = 14)	Good Images	308.601	381.018	359.417	RCCA_LAX (N = 12)	Noisy Images			-	-	-	-	74.0585	0.139647	72.4168	0.234661		-	-	-	-	1.13965	0.149398	1.23466	0.262194
		2013-06-07	587	1146.87	1429.42	340.538	ATA_LAX (N = 13)	Good Images	-	-	-	-	-	581.649	648.497	332.125	IAA_LAX2 (N = 8)	Noisy Images	-	-	-	-	-			282.546	0.246362	-	-	66.8477	0.114928	-	-		1.24636	0.27671	-	-	1.11493	0.121532	-	-
		2013-06-10	592	1217.22	1506.64	445.6	ATA_LAX (N = 10)	Good Images	-	-	-	-	-	-	-	-	-	-	-	-	-	-	-			289.427	0.237778	-	-	-	-	-	-		1.23778	0.266047	-	-	-	-	-	-
		2013-06-14	593	1194.37	1498.36	424.625	ATA_LAX (N = 16)	Good Images	-	-	-	-	-	432.497	525.3	371.062	IAA_LAX (N = 16)	Good Images	348.278	409.574	413.333	RCCA_LAX (N = 12)	Good Images			-	-	-	-	92.803	0.214575	61.2969	0.176		-	-	-	-	1.21457	0.237596	1.176	0.191488
		2013-06-17	600	1350.78	1640.12	446.467	ATA_LAX (N = 30)	Noisy Images	-	-	-	-	-	537.46	608.646	493.294	IAA_LAX (N = 17)	Good Images	368.194	454.503	505.067	LCCA_LAX (N = 15)	Good Images			289.335	0.214198	-	-	71.1855	0.132448	86.3089	0.234412		1.2142	0.237139	-	-	1.13245	0.141219	1.23441	0.261886
		mean		1227.31	1518.64	414.308	4		#DIV/0!	#DIV/0!	#DIV/0!	0		520.483	596.706	390.46	4		341.691	415.032	425.939	3				287.103	0.23278	-	-	76.2237	0.1504	73.3409	0.215024		1.23278	0.259965	-	-	1.1504	0.162436	1.21502	0.238523
		SD		87.3743	88.0764	50.2054			#DIV/0!	#DIV/0!	#DIV/0!			62.8966	51.5837	70.6735			30.3373	37.045	73.6387					3.94649	0.0166544	-	-	11.4434	0.0440249	12.5316	0.0337962		0.0166544	0.0204744	-	-	0.0440249	0.0514532	0.0337962	0.0407335
		SEM		43.6871	44.0382	25.1027			#DIV/0!	#DIV/0!	#DIV/0!			31.4483	25.7918	35.3368			17.5153	21.388	42.5153					2.27851	0.0096154	-	-	5.72169	0.0220125	7.23512	0.0195123		0.0096154	0.0118209	-	-	0.0220125	0.0257266	0.0195123	0.0235175
	F	2013-06-03	572	1043.76	1261.71	673	ATA_LAX2 (N = 3)	Bad Images	-	-	-	-	-	533.29	668.56	463.44	IAA_LAX1 (N = 25)	GREAT Images	313.257	403.589	691.462	LCCA_LAX (N = 26)	Good Images			-	-	-	-	135.27	0.253652	90.3324	0.288366		-	-	-	-	1.25365	0.285822	1.28837	0.329943
		2013-06-06	580	1097.81	1395.99	354.688	ATA_LAX (N = 16)	GREAT Images	-	-	-	-	-	-	-	-	-	-	327.849	396.803	372.231	RCCA_LAX (N = 13)	Small diameter?			298.182	0.271615	-	-	-	-	68.9548	0.210325		1.27162	0.308503	-	-	-	-	1.21033	0.232443
		2013-06-07	588	1101.89	1329.71	357.4	ATA_LAX (N = 4)	Selected Cycles	-	-	-	-	-	459.615	565.554	393	IAA_LAX (N = 5)	Selected Cycles	265.881	379.539	335.722	RCCA_LAX (N = 18)	Small diameter?			227.824	0.206757	-	-	105.94	0.230496	-	-		1.20676	0.228132	-	-	1.2305	0.257061	-	-
		2013-06-17	602	1034.29	1210.09	453.692	ATA_LAX (N = 13)	Noisy Images	-	-	-	-	-	597.452	651.121	445.7	IAA_LAX (N = 10)	Noisy Images	439.182	498.209	442.15	RCCA_LAX (N = 20)	Good Images			-	-	-	-	53.6691	0.0898301	-	-		-	-	-	-	1.08983	0.0938648	-	-
		2013-06-17	603	-	-	-	-	Very Noisy Images	-	-	-	-	-	461.788	545.996	354	IAA_LAX (N = 3)	Selected Cycles	351.895	422.634	358.636	RCCA_LAX (N = 11)	Noisy Images			-	-	-	-	84.2084	0.182353	70.7386	0.201022		-	-	-	-	1.18235	0.198979	1.20102	0.221227
		2013-06-17	604	1092.31	1305.18	591.583	ATA_LAX1 (N = 12)	Noisy Images	-	-	-	-	-	509.695	603.041	474.636	IAA_LAX (N = 11)	Good Images	-	-	-	-	-			212.879	0.194889	-	-	-	-	-	-		1.19489	0.21388	-	-	-	-	-	-
		2013-06-24	606	1441.03	1534.51	431.533	ATA_LAX (N = 15)	BIG diameter!	-	-	-	-	-	619.339	689.376	432.1	IAA_LAX (N = 10)	BIG diameter!	500.366	576.681	424.474	RCCA_LAX (N = 19)	BIG diameter!			93.4828	0.0648724	-	-	70.0371	0.113084	76.3157	0.15252		1.06487	0.0669766	-	-	1.11308	0.119478	1.15252	0.164151
		2013-06-20	612	1134.43	1429.07	554.846	ATA_LAX (N = 13)	Good Images	-	-	-	-	-	581.853	675.149	547.9	IAA_LAX (N = 20)	Good Images	352.932	464.031	532.333	RCCA_LAX (N = 18)	Good Images			294.64	0.259724	-	-	93.2962	0.160343	111.099	0.314789		1.25972	0.293453	-	-	1.16034	0.173198	1.31479	0.364336
		mean		1135.07	1352.32	488.106	7		#DIV/0!	#DIV/0!	#DIV/0!	0		537.576	628.4	444.397	7		364.48	448.784	451.001	7				225.401	0.199572	-	-	90.4034	0.171626	83.4881	0.233404		1.19957	0.222189	-	-	1.17163	0.188067	1.2334	0.26242
		SD		139.297	109.668	121.53			#DIV/0!	#DIV/0!	#DIV/0!			64.3535	56.8854	61.8548			79.6079	69.8286	124.662					83.1507	0.0821981	-	-	28.5143	0.0641158	17.5672	0.0666481		0.0821981	0.0958173	-	-	0.0641158	0.0751464	0.0666481	0.0824597
		SEM		52.6492	41.4505	45.9339			#DIV/0!	#DIV/0!	#DIV/0!			24.3233	21.5007	23.3789			30.089	26.3927	47.1177					37.1861	0.0367601	-	-	11.6409	0.0261752	7.85629	0.0298059		0.0367601	0.0428508	-	-	0.0261752	0.0306784	0.0298059	0.0368771
	t-test			0.211337	0.0261061	0.193764			#DIV/0!	#DIV/0!	#DIV/0!			0.681126	0.376918	0.252816			0.531114	0.352741	0.705347					0.1725	0.426092	-	-	0.310379	0.552204	0.381228	0.624442		0.426092	0.437581	-	-	0.552204	0.54007	0.624442	0.604683
Un-KO		Test Dates	Mouse #	ATA					SAA					IAA					CCA							Circumferential Displacements & Linear Strains									Circumferential Stretches & Green Strains
				Inner Diameter (µm)		HR (bpm)	Data File	Comments	Inner Diameter (µm)		HR (bpm)	Data File	Comments	Inner Diameter (µm)		HR (bpm)	Data File	Comments	Inner Diameter (µm)		HR (bpm)	Data File	Comments			ATA		SAA		IAA		CCA			ATA		SAA		IAA		CCA
				diastole	systole				diastole	systole				diastole	systole				diastole	systole						∆id (µm)	εϑ	∆id (µm)	εϑ	∆id (µm)	εϑ	∆id (µm)	εϑ		idsys/iddia	Eϑϑ	idsys/iddia	Eϑϑ	idsys/iddia	Eϑϑ	idsys/iddia	Eϑϑ
Fbln5 -/- @ 20-22 wks (Untreated)	M	2013-06-10	583	-	-	-	-	-	-	-	-	-	-	485.519	564.969	367.304	IAA_LAX1 (N = 23)	Good Images	-	-	-	-	-			-	-	-	-	-	-	-	-		-	-	-	-	-	-	-	-
		2013-06-10	591	928.18	1129.62	305	ATA_LAX (N = 6)	Selected Cycles	-	-	-	-	-	603.092	737.452	339.9	IAA_LAX (N = 20)	Good Images	314.175	397.937	309.692	RCCA_LAX (N = 13)	Good Images			201.441	0.217028	-	-	134.36	0.222786	83.7618	0.266608		1.21703	0.240578	-	-	1.22279	0.247602	1.26661	0.302148
		2013-06-14	594	893.695	1043.1	336.333	ATA_LAX (N = 3)	Selected Cycles	-	-	-	-	-	472.234	596.697	292.846	IAA_LAX (N = 13)	Good Images	-	-	-	-	-			149.402	0.167173	-	-	124.463	0.263562	-	-		1.16717	0.181147	-	-	1.26356	0.298294	-	-
		2013-06-20	613	1078.68	1257.6	468.5	ATA_LAX (N = 18)	Good Images	-	-	-	-	-	525.895	604.671	469.333	IAA_LAX (N = 15)	Good Images	299.709	398.215	480.444	RCCA_LAX (N = 9)	Good Images			178.924	0.165874	-	-	78.7756	0.149793	98.5057	0.328671		1.16587	0.179631	-	-	1.14979	0.161012	1.32867	0.382683
		2013-06-24	615	1186.04	1249.76	467	ATA_LAX1 (N = 14)	WEIRD Wave!	-	-	-	-	-	646.231	728.354	558.8	IAA_LAX (N = 10)	Noisy Images	397.403	453.043	589.234	LCCA_LAX (N = 47)	Good Images			63.7215	0.0537265	-	-	82.1221	0.127078	55.6398	0.140008		1.05373	0.0551697	-	-	1.12708	0.135153	1.14001	0.14981
		2013-06-24	619	1080.33	1142.36	398.6	ATA_LAX (N = 20)	WEIRD Wave!	-	-	-	-	-	602.31	657.122	367	IAA_LAX (N = 11)	Good Images	271.42	307.496	482.938	RCCA_LAX (N = 16)	Small diameter?			62.0297	0.0574172	-	-	54.8115	0.0910021	-	-		1.05742	0.0590656	-	-	1.091	0.0951428	-	-
		mean		1033.38	1164.49	395.087	5		#DIV/0!	#DIV/0!	#DIV/0!	0		555.88	648.211	399.197	6		320.677	389.173	465.577	4				131.104	0.132244	-	-	94.9064	0.170844	79.3024	0.245096		1.13224	0.143118	-	-	1.17084	0.187441	1.2451	0.278214
		SD		120.56	89.9749	74.3992			#DIV/0!	#DIV/0!	#DIV/0!			71.2664	72.0348	97.2344			54.1453	60.3022	115.634					64.9625	0.0729783	-	-	33.397	0.0707598	21.7781	0.0961533		0.0729783	0.0822763	-	-	0.0707598	0.0834555	0.0961533	0.118267
		SEM		53.9161	40.238	33.2723			#DIV/0!	#DIV/0!	#DIV/0!			29.0944	29.4081	39.6958			27.0726	30.1511	57.8169					29.0521	0.0326369	-	-	14.9356	0.0316447	12.5736	0.0555141		0.0326369	0.0367951	-	-	0.0316447	0.0373224	0.0555141	0.0682816
	F	2013-06-03	573	1129.74	1231.94	443.833	ATA_LAX (N = 18)	Noisy Images	-	-	-	-	-	469.598	535.81	449.375	IAA_LAX (N = 8)	Selected Cycles	-	-	-	-	Bad Images			-	-	-	-	66.2122	0.140998	-	-		-	-	-	-	1.141	0.150938	-	-
		2013-06-07	589	979.574	1333.83	453.286	ATA_LAX2 (N = 14)	Noisy / Good Track	-	-	-	-	-	-	-	-	-	Noisy Images	337.664	385.171	463.132	RCCA_LAX2 (N = 38)	Noisy Images			354.252	0.361639	-	-	-	-	47.5066	0.140692		1.36164	0.427031	-	-	-	-	1.14069	0.150589
		2013-06-07	609	925.775	1017.84	394.412	ATA_LAX2 (N = 17)	Good Images	-	-	-	-	-	454.318	559.837	379	IAA_LAX (N = 4)	Bad Images	314.426	382.12	401.133	RCCA_LAX2 (N = 15)	Noisy / Good Track			92.0693	0.0994511	-	-	105.52	0.23226	67.6939	0.215293		1.09945	0.104396	-	-	1.23226	0.259232	1.21529	0.238469
		2013-06-24	620	-	-	-	-	Dying Mouse	-	-	-	-	-	-	-	-	-	Dying Mouse	-	-	-	-	Dying Mouse			-	-	-	-	-	-	-	-		-	-	-	-	-	-	-	-
		2013-12-06	773	879.553	998.674	373.696	ATA_LAX (N = 23)	Good Images	-	-	-	-	-	545.317	603.72	457.917	IAA_LAX (N = 12)	Good Images	389.624	430.59	494.44	RCCA_LAX (N = 25)	Noisy Images			119.121	0.135434	-	-	58.4026	0.107098	40.9662	0.105143		1.13543	0.144605	-	-	1.1071	0.112833	1.10514	0.110671
		2015-04-30	416	908.689	1121.91	369.333	ATA_LAX (N = 9)	Noisy Images	732.115	895.669	445.027	SAA_LAX (N = 37)	Good Images	505.473	628.351	447.059	IAA_LAX (N = 17)	Noisy Images	299.257	349.51	447.722	RCCA_LAX (N = 18)	Good Images			-	-	163.554	0.223399	122.878	0.243094	50.2534	0.167927		-	-	1.2234	0.248353	1.24309	0.272642	1.16793	0.182027
		2015-05-14	451	1131.45	1258.6	460.6	ATA_LAX (N = 15)	WEIRD Wave!	780.906	904.835	413.87	SAA_LAX (N = 23)	Good Images	505.25	589.038	432.571	IAA_LAX (N = 14)	Good Images	326.927	421.362	433.059	LCCA_LAX (N = 17)	Good Images			127.156	0.112383	123.93	0.1587	83.7876	0.165834	94.4348	0.288856		1.11238	0.118698	1.1587	0.171293	1.16583	0.179584	1.28886	0.330575
		mean		992.463	1160.47	415.86	6		756.51	900.252	429.448	2		495.991	583.351	433.184	5		333.58	393.751	447.897	5				173.15	0.177227	143.742	0.191049	87.3599	0.177857	60.171	0.183582		1.17723	0.198683	1.19105	0.209823	1.17786	0.195046	1.18358	0.202466
		SD		111.841	136.233	41.4426			34.5003	6.48157	22.0317			35.5035	36.3498	31.6332			34.4485	32.7322	34.6604					121.664	0.123839	28.0187	0.0457495	26.8784	0.0585779	21.5533	0.0712839		0.123839	0.153139	0.0457495	0.0544899	0.0585779	0.0690732	0.0712839	0.0855038
		SEM		45.659	55.6171	16.9189			24.3954	4.58316	15.5787			15.8776	16.2561	14.1468			15.4058	14.6383	15.5006					60.8322	0.0619195	19.8122	0.0323498	12.0204	0.0261968	9.63891	0.0318791		0.0619195	0.0765695	0.0323498	0.0385302	0.0261968	0.0308905	0.0318791	0.0382384
	t-test			0.577736	0.954634	0.597935			#DIV/0!	#DIV/0!	#DIV/0!			0.110468	0.0914471	0.449658			0.696309	0.897393	0.784698					0.564016	0.550894	-	-	0.704601	0.868843	0.289426	0.400632		0.550894	0.545894	-	-	0.868843	0.879289	0.400632	0.398749
Un-OLD		Test Dates	Mouse #	ATA					SAA					IAA					CCA							Circumferential Displacements & Linear Strains									Stretches & Green Strains
				Inner Diameter (µm)		HR (bpm)	Data File	Comments	Inner Diameter (µm)		HR (bpm)	Data File	Comments	Inner Diameter (µm)		HR (bpm)	Data File	Comments	Inner Diameter (µm)		HR (bpm)	Data File	Comments			ATA		SAA		IAA		CCA			ATA		SAA		IAA		CCA
				diastole	systole				diastole	systole				diastole	systole				diastole	systole						∆id (µm)	εϑ	∆id (µm)	εϑ	∆id (µm)	εϑ	∆id (µm)	εϑ		idsys/iddia	Eϑϑ	idsys/iddia	Eϑϑ	idsys/iddia	Eϑϑ	idsys/iddia	Eϑϑ
Fbln5 +/+ @ 100-110 wks (Untreated)	M	2015-05-14	722	1436.79	1642.88	485.6	ATA_LAX2 (N = 5)	Selected Cycles	969.011	1096.93	583	SAA_LAX2 (N = 17)	-	-	-	-	IAA_LAX (N = 15)	Same diam as SAA!	426.737	537.847	547.455	LCCA_LAX (N = 11)	Noisy Images			206.091	0.143439	127.917	0.132007	-	-	111.11	0.260371		1.14344	0.153726	1.13201	0.14072	-	-	1.26037	0.294267
		2015-05-21	733	-	-	-	-	-	-	-	-	-	-	543.545	619.96	408.7	IAA_LAX (N = 10)	Good Images	404.064	479.445	421.75	LCCA_LAX (N = 12)	Good Images			-	-	-	-	76.4157	0.140588	75.3801	0.186555		-	-	-	-	1.14059	0.15047	1.18655	0.203956
		2015-05-14	736	1299.26	1527.49	422.938	ATA_LAX (N = 16)	Dying Mouse	-	-	-	-	Dying Mouse	-	-	-	-	Dying Mouse	-	-	-	LCCA_LAX (N = 14)	Dying Mouse			228.229	0.175661	-	-	-	-	-	-		1.17566	0.191089	-	-	-	-	-	-
		2015-04-30	740	1230.63	1440.06	536.889	ATA_LAX2 (N = 9)	Noisy Images	962.642	1116.12	465.667	SAA_LAX (N = 9)	Good Images	-	-	-	-	-	382.22	461.722	473	LCCA_LAX (N = 16)	Good Images			209.43	0.170181	153.481	0.159437	-	-	79.5018	0.208		1.17018	0.184662	1.15944	0.172147	-	-	1.208	0.229632
		2015-04-09	742	1323.15	1471.39	461.333	ATA_LAX (N = 9)	WEIRD Wave!	1026.74	1191.48	447	SAA_LAX (N = 11)	-	-	-	-	-	-	441.531	527.661	463	LCCA_LAX (N = 36)	Good Images			148.24	0.112035	164.739	0.160449	-	-	86.13	0.195071		1.11204	0.118311	1.16045	0.173321	-	-	1.19507	0.214098
		2015-05-21	747	1380.36	1614.27	456.941	ATA_LAX (N = 17)	Noisy Images	1230.65	1295.72	463.556	SAA_LAX (N = 9)	Noisy Images	619.462	683.624	479.111	IAA_LAX (N = 9)	Good Images	429.194	511.206	501.115	LCCA_LAX (N = 26)	Good Images			233.911	0.169457	65.0688	0.0528734	64.1626	0.103578	82.0116	0.191083		1.16946	0.183815	1.05287	0.0542712	1.10358	0.108942	1.19108	0.209339
		mean		1334.04	1539.22	472.74	5		1047.26	1175.06	489.806	4		581.503	651.792	443.906	2		416.749	503.576	481.264	5				205.18	0.154154	127.801	0.126192	70.2891	0.122083	86.8267	0.208216		1.15415	0.166321	1.12619	0.135115	1.12208	0.129706	1.20822	0.230258
		SD		78.6195	87.9607	42.2506			125.615	90.1987	62.6878			53.6815	45.0173	49.7882			23.5686	32.1981	46.6879					33.9771	0.0266569	44.5692	0.0506234	8.66422	0.0261698	14.1247	0.0302313		0.0266569	0.0304935	0.0506234	0.0559708	0.0261698	0.0293647	0.0302313	0.037041
		SEM		35.1597	39.3372	18.8951			62.8075	45.0993	31.3439			37.9585	31.832	35.2056			10.5402	14.3994	20.8795					15.195	0.0119213	22.2846	0.0253117	6.12653	0.0185048	6.31675	0.0135199		0.0119213	0.0136371	0.0253117	0.0279854	0.0185048	0.020764	0.0135199	0.0165653
	F	2014-09-16	465	1117.55	1476.64	433.667	2nd attempt (N = 9)	Noisy Images	-	-	-	-	-	686.061	793.528	421.188	IAA_LAX (N = 16)	Good Images	460.307	590.334	433.667	LCCA_LAX2 (N = 10)	Noisy Images			359.086	0.321315	-	-	107.468	0.156644	130.026	0.282477		1.32131	0.372936	-	-	1.15664	0.168913	1.28248	0.322374
		2014-11-18	484	1272.34	1444.55	401.789	ATA_LAX (N = 19)	Good Images	970.553	1085.62	432	SAA_LAX (N = 9)	Noisy Images	636.596	714.733	449.412	IAA_LAX (N = 17)	Good Images	-	-	-	-	-			172.213	0.135352	115.07	0.118561	78.1364	0.122741	-	-		1.13535	0.144512	1.11856	0.12559	1.12274	0.130274	-	-
		2014-11-18	486	1305.19	1585.92	452.625	ATA_LAX (N = 16)	Good Images	-	-	-	-	-	564.911	664.667	469.286	IAA_LAX (N = 14)	Good Images	357.995	413.051	429	LCCA_LAX (N = 19)	Noisy Images			280.731	0.215088	-	-	99.7561	0.176587	55.0557	0.153789		1.21509	0.23822	-	-	1.17659	0.192179	1.15379	0.165614
		2014-12-04	492	1274.45	1466.22	512.5	ATA_LAX1 (N = 14)	WEIRD Wave!	761.135	894.782	521.533	SAA_LAX (N = 15)	Good Images	467.117	529.561	509.2	IAA_LAX (N = 10)	Noisy Images	426.879	477.831	490.5	LCCA_LAX (N = 16)	Noisy Images			191.772	0.150475	133.647	0.175589	62.4438	0.133679	50.952	0.11936		1.15048	0.161796	1.17559	0.191005	1.13368	0.142614	1.11936	0.126483
		2014-09-16	495	1294	1492.84	500.222	ATA_LAX3 (N = 9)	Selected Cycles	-	-	-	-	-	692.682	793.189	489.778	IAA_LAX (N = 9)	Good Images	438.277	504.435	532	LCCA_LAX (N = 10)	Good Images			198.846	0.153668	-	-	100.507	0.145098	66.1586	0.150952		1.15367	0.165475	-	-	1.1451	0.155625	1.15095	0.162345
		2014-12-11	501	1191.18	1449.43	398.8	ATA_LAX2 (N = 10)	-	1087.65	1174.85	377	ATA_LAX (N = 4)	Selected Cycles	-	-	-	-	Too small diameter	-	-	-	-	Noisy Images			258.253	0.216804	87.2001	0.0801726	-	-	-	-		1.2168	0.240306	1.08017	0.0833864	-	-	-	-
		2014-12-04	507	1064.88	1358.46	399	ATA_LAX (N = 12)	Noisy Images	961.596	1086.54	477.083	SAA_LAX (N = 24)	Good Images	-	-	-	-	-	469.488	553.22	425	LCCA_LAX (N = 26)	Good Images			293.584	0.275697	124.946	0.129936	-	-	83.7313	0.178346		1.2757	0.313702	1.12994	0.138377	-	-	1.17835	0.19425
		2014-12-11	523	1284.57	1612.32	431.824	ATA_LAX (N = 17)	Noisy Images	1017.3	1172.22	469.52	SAA_LAX (N =25)	-	713.476	765.7	416.158	IAA_LAX (N = 19)	Noisy Images	496.262	617.91	433.667	LCCA_LAX (N = 18)	Good Images			327.757	0.25515	154.927	0.152292	52.2245	0.0731973	121.649	0.24513		1.25515	0.287701	1.15229	0.163889	1.0732	0.0758762	1.24513	0.275175
		2014-10-21	524	-	-	-	-	Dying Mouse	-	-	-	-	Dying Mouse	-	-	-	-	Dying Mouse	-	-	-	-	Dying Mouse			-	-	-	-	-	-	-	-		-	-	-	-	-	-	-	-
		2015-04-30	732	1295.18	1521.91	549.333	ATA_LAX2 (N = 9)	Good Images	-	-	-	-	-	-	-	-	-	Noisy Images	454.997	557.308	524.222	LCCA_LAX (N = 18)	Good Images			226.732	0.175058	-	-	-	-	102.311	0.22486		1.17506	0.190381	-	-	-	-	1.22486	0.250141
		mean		1233.26	1489.81	453.307	9		959.647	1082.8	455.427	5		626.807	710.23	459.17	6		443.458	530.584	466.865	7				256.553	0.210956	123.158	0.13131	83.4225	0.134658	87.1262	0.193559		1.21096	0.235003	1.13131	0.140449	1.13466	0.144247	1.19356	0.213769
		SD		88.08	76.6056	55.1679			121.695	113.846	54.1694			94.6465	101.622	37.2293			43.7578	70.36	47.4021					64.2951	0.0635605	24.904	0.0359873	22.7077	0.0354143	31.757	0.0587081		0.0635605	0.0777881	0.0359873	0.0405787	0.0354143	0.0397689	0.0587081	0.0705358
		SEM		29.36	25.5352	18.3893			54.4239	50.9133	24.2253			38.6393	41.4871	15.1988			16.5389	26.5936	17.9163					21.4317	0.0211868	11.1374	0.016094	9.27036	0.0144578	12.003	0.0221896		0.0211868	0.0259294	0.016094	0.0181474	0.0144578	0.0162356	0.0221896	0.02666
	t-test			0.0544869	0.325218	0.477282			0.329577	0.217104	0.41864			0.457458	0.318515	0.742866			0.204631	0.395356	0.613566					0.0742211	0.0383848	0.860285	0.870861	0.287691	0.637628	0.982876	0.58598		0.0383848	0.0382877	0.870861	0.878801	0.637628	0.628011	0.58598	0.611473
Tr-WT		Test Dates	Mouse #	ATA					SAA					IAA					CCA							Circumferential Displacements & Linear Strains									Stretches & Green Strains
				Inner Diameter (µm)		HR (bpm)	Data File	Comments	Inner Diameter (µm)		HR (bpm)	Data File	Comments	Inner Diameter (µm)		HR (bpm)	Data File	Comments	Inner Diameter (µm)		HR (bpm)	Data File	Comments			ATA		SAA		IAA		CCA			ATA		SAA		IAA		CCA
				diastole	systole				diastole	systole				diastole	systole				diastole	systole						∆id (µm)	εϑ	∆id (µm)	εϑ	∆id (µm)	εϑ	∆id (µm)	εϑ		idsys/iddia	Eϑϑ	idsys/iddia	Eϑϑ	idsys/iddia	Eϑϑ	idsys/iddia	Eϑϑ
Fbln5 +/+ @ 20-22 wks (NaCl & L-NAME)	M	2013-07-25	645	1387.64	1575.16	431	ATA_LAX (N = 14)	-	-	-	-	-	-	532.786	627.488	427	IAA_LAX (N = 13)	-	-	-	-	-	-			187.527	0.135142	-	-	94.702	0.177748	-	-		1.13514	0.144273	-	-	1.17775	0.193546	-	-
		2013-07-29	653	1174.5	1382.36	442.75	ATA_LAX (N = 20)	-	-	-	-	-	-	-	-	-	-	Noisy Images	328.741	393.666	463.714	RCCA_LAX (N = 14)	-			207.861	0.176977	-	-	-	-	64.9246	0.197494		1.17698	0.192638	-	-	-	-	1.19749	0.216996
		2013-07-29	656	1217.86	1379.64	409.667	ATA_LAX (N = 9)	-	-	-	-	-	-	516.874	573.193	460.947	IAA_LAX (N = 19)	-	312.812	416.779	439.706	RCCA_LAX (N = 17)	-			161.787	0.132846	-	-	56.3189	0.108961	103.967	0.332362		1.13285	0.14167	-	-	1.10896	0.114897	1.33236	0.387594
		2013-08-26	670	1395.92	1604.96	324.053	ATA_LAX (N = 19)	-	-	-	-	-	-	-	-	-	-	Too Small Diameter	394.14	453.142	305.429	RCCA_LAX (N = 14)	-			209.035	0.149747	-	-	-	-	59.0023	0.149699		1.14975	0.160959	-	-	-	-	1.1497	0.160904
		2013-12-06	779	1137.1	1429.01	455.556	ATA_LAX (N = 27)	-	-	-	-	-	-	-	-	-	-	Noisy Images	305.454	382.039	508.05	RCCA_LAX (N = 20)	-			291.915	0.256719	-	-	-	-	76.5849	0.250725		1.25672	0.289672	-	-	-	-	1.25072	0.282156
		2014-08-21	182	1058.01	1367.67	306.667	ATA_LAX (N = 15)	-	-	-	-	-	-	508.955	600.818	323.636	IAA_LAX (N = 11)	-	350.407	428.548	378.955	LCCA_LAX (N = 22)	Great Images			309.658	0.292679	-	-	91.8637	0.180495	78.1417	0.223003		1.29268	0.335509	-	-	1.18049	0.196784	1.223	0.247868
		2014-08-21	184	1146.04	1431.15	377.947	ATA_LAX (N = 19)	-	-	-	-	-	-	456.269	550.107	380.077	IAA_LAX (N = 26)	-	383.465	484.267	412.029	LCCA_LAX (N = 34)	-			285.109	0.248778	-	-	93.8386	0.205665	100.802	0.262872		1.24878	0.279723	-	-	1.20567	0.226814	1.26287	0.297422
		2014-08-12	188	982.542	1275.72	495.8	ATA_LAX (N = 25)	-	-	-	-	-	-	-	-	-	-	-	-	-	-	-	Noisy Images			293.18	0.298389	-	-	-	-	-	-		1.29839	0.342907	-	-	-	-	-	-
		2014-08-12	190	1184.99	1386.58	417.875	ATA_LAX (N = 16)	-	-	-	-	-	-	-	-	-	-	Noisy Images	373.217	454.157	403.824	LCCA_LAX (N = 17)	-			201.592	0.170121	-	-	-	-	80.9397	0.216871		1.17012	0.184592	-	-	-	-	1.21687	0.240387
		2014-08-05	192	1198.47	1438.01	594.778	ATA_LAX (N = 9)	-	-	-	-	-	-	-	-	-	-	No Images	312.403	412.531	567.773	LCCA_LAX (N = 22)	-			239.541	0.199872	-	-	-	-	100.128	0.320511		1.19987	0.219847	-	-	-	-	1.32051	0.371874
		2014-11-04	256	1340.1	1685.85	347.1	ATA_LAX (N = 10)	-	-	-	-	-	-	457.374	510.089	485.844	IAA_LAX (N = 32)	-	388.982	437.612	419.3	RCCA_LAX (N = 20)	-			345.752	0.258005	-	-	52.7151	0.115256	48.6299	0.125018		1.258	0.291288	-	-	1.11526	0.121898	1.12502	0.132833
		2014-11-11	257	897.506	1326.34	348.5	ATA_LAX (N = 10)	-	936.421	1158.09	396.889	SAA_LAX (N = 9)	-	429.531	522.567	409.375	IAA_LAX (N = 24)	-	304.1	369.218	350.733	LCCA_LAX (N = 15)	-			428.829	0.477801	221.671	0.236721	93.0367	0.216601	65.1182	0.214134		1.4778	0.591948	1.23672	0.264739	1.2166	0.240059	1.21413	0.237061
		mean		1176.72	1440.21	412.641	12		936.421	1158.09	396.889	1		483.631	564.044	414.48	6		345.372	423.196	424.951	10				263.482	0.23309	221.671	0.236721	80.4125	0.167454	77.8239	0.229269		1.23309	0.264585	1.23672	0.264739	1.16745	0.182333	1.22927	0.25751
		SD		151.877	121.011	80.8492			-	-	-			41.298	45.3584	58.0878			36.8969	35.6775	75.7031					76.8536	0.0972016	-	-	20.1126	0.045382	19.0165	0.0659746		0.0972016	0.125698	-	-	0.045382	0.0526221	0.0659746	0.0813252
		SEM		43.8432	34.9329	23.3392			-	-	-			16.8599	18.5175	23.7142			11.6678	11.2822	23.9394					22.1857	0.0280597	-	-	8.21095	0.0185271	6.01355	0.020863		0.0280597	0.036286	-	-	0.0185271	0.0214829	0.020863	0.0257173
	F	2013-07-25	641	1081.73	1314.2	473.4	ATA_LAX2 (N = 25)	-	-	-	-	-	-	-	-	-	-	Noisy Images	232.62	304.228	517.133	RCCA_LAX (N = 15)	-			232.462	0.214898	-	-	-	-	71.6086	0.307835		1.2149	0.237988	-	-	-	-	1.30784	0.355217
		2013-08-08	663	1229.05	1351.39	492.769	ATA_LAX2 (N = 13)	-	-	-	-	-	-	-	-	-	-	Noisy Images	-	-	-	-	Noisy Images			122.339	0.0995394	-	-	-	-	-	-		1.09954	0.104493	-	-	-	-	-	-
		2013-08-09	668	1238.19	1443.95	422.273	ATA_LAX (N = 11)	-	-	-	-	-	-	447.005	537.899	438.167	IAA_LAX (N = 24)	-	368.937	453.92	464.929	RCCA_LAX (N = 14)	-			205.757	0.166175	-	-	90.8941	0.20334	84.9833	0.230346		1.16618	0.179983	-	-	1.20334	0.224014	1.23035	0.256876
		2013-08-26	673	1065.52	1394.2	380.071	ATA_LAX (N = 14)	-	-	-	-	-	-	449.637	506.981	539.429	IAA_LAX (N = 28)	-	-	-	-	-	-			328.683	0.308473	-	-	57.3446	0.127535	-	-		1.30847	0.356051	-	-	1.12754	0.135668	-	-
		2013-08-26	675	1106.78	1306.16	353.9	ATA_LAX2 (N = 10)	-	-	-	-	-	-	-	-	-	-	Too Small Diameter	327.739	411.286	417.935	RCCA_LAX (N = 31)	-			199.385	0.18015	-	-	-	-	83.5462	0.254917		1.18015	0.196377	-	-	-	-	1.25492	0.287408
		2013-12-12	790	1003.85	1269.71	638.478	ATA_LAX (N = 23)	-	-	-	-	-	-	-	-	-	-	Too Small Diameter	303.758	395.536	729.615	RCCA_LAX (N = 26)	-			265.865	0.264845	-	-	-	-	91.7781	0.302142		1.26485	0.299916	-	-	-	-	1.30214	0.347788
		2014-08-19	195	1040.53	1314.35	404	ATA_LAX (N = 18)	-	-	-	-	-	-	505.55	631.031	416.167	IAA_LAX (N = 18)	-	398.46	502.413	429.933	LCCA_LAX (N = 15)	-			273.815	0.263148	-	-	125.481	0.248208	103.952	0.260885		1.26315	0.297772	-	-	1.24821	0.279011	1.26088	0.294915
		2014-08-26	199	-	-	-	-	-	-	-	-	-	-	471.295	530.377	427.333	IAA_LAX (N = 12)	-	259.816	370.947	392.765	LCCA_LAX (N = 17)	-			-	-	-	-	59.0817	0.12536	111.131	0.427732		-	-	-	-	1.12536	0.133218	1.42773	0.519209
		2014-11-04	240	1173.64	1388.69	455.476	ATA_LAX (N = 21)	-	-	-	-	-	-	452.228	542.601	519.75	IAA_LAX (N = 12)	-	341.675	405.305	488.45	LCCA_LAX (N = 20)	-			215.048	0.183232	-	-	90.3729	0.199839	63.6303	0.18623		1.18323	0.200019	-	-	1.19984	0.219807	1.18623	0.203571
		2014-11-11	250	1030.33	1272.15	497	ATA_LAX2 (N = 13)	-	816.095	987.14	500.467	SAA_LAX (N = 15)	-	374.354	506.269	494.688	IAA_LAX (N = 16)	-	309.16	391.671	481	LCCA_LAX (N = 32)	-			241.816	0.234697	171.044	0.209588	131.915	0.352381	82.5106	0.266886		1.2347	0.262238	1.20959	0.231552	1.35238	0.414467	1.26689	0.3025
		mean		1107.74	1339.42	457.485	9		816.095	987.14	500.467	1		450.011	542.526	472.589	6		317.771	404.413	490.22	8				231.686	0.212795	171.044	0.209588	92.515	0.209444	86.6426	0.279622		1.2128	0.237204	1.20959	0.231552	1.20944	0.234364	1.27962	0.320935
		SD		86.4862	59.4277	84.1469			-	-	-			43.0713	46.0005	52.1469			54.3528	57.9422	104.962					57.4499	0.0630704	-	-	31.6263	0.0846667	15.6329	0.0712274		0.0630704	0.0760667	-	-	0.0846667	0.104615	0.0712274	0.0935243
		SEM		28.8287	19.8092	28.049			-	-	-			17.5838	18.7796	21.2889			19.2166	20.4856	37.1097					19.15	0.0210235	-	-	12.9114	0.034565	5.52705	0.0251827		0.0210235	0.0253556	-	-	0.034565	0.0427087	0.0251827	0.0330658
	t-test			0.205148	0.0226222	0.235832			-	-	-			0.197682	0.433583	0.0985734			0.243357	0.438766	0.164419					0.29153	0.569617	-	-	0.450535	0.316906	0.296305	0.145058		0.569617	0.543818	-	-	0.316906	0.31071	0.145058	0.152185
Tr-KO		Test Dates	Mouse #	ATA					SAA					IAA					CCA							Circumferential Displacements & Linear Strains									Stretches & Green Strains
				Inner Diameter (µm)		HR (bpm)	Data File	Comments	Inner Diameter (µm)		HR (bpm)	Data File	Comments	Inner Diameter (µm)		HR (bpm)	Data File	Comments	Inner Diameter (µm)		HR (bpm)	Data File	Comments			ATA		SAA		IAA		CCA			ATA		SAA		IAA		CCA
				diastole	systole				diastole	systole				diastole	systole				diastole	systole						∆id (µm)	εϑ	∆id (µm)	εϑ	∆id (µm)	εϑ	∆id (µm)	εϑ		idsys/iddia	Eϑϑ	idsys/iddia	Eϑϑ	idsys/iddia	Eϑϑ	idsys/iddia	Eϑϑ
Fbln5 -/- @ 20-22 wks (NaCl & L-NAME)	M	2013-08-16	678	1045.95	1247.95	372.167	ATA_LAX1 (N = 6)	Selected Cycles	-	-	-	-	-	495.184	551.673	429.176	IAA_LAX (N = 17)	-	352.935	439.261	477	RCCA_LAX (N = 29)	-			202.003	0.193129	-	-	56.4889	0.114077	86.3265	0.244596		1.19313	0.211778	-	-	1.11408	0.120583	1.2446	0.27451
		2013-08-16	679	1023.58	1123.43	345.833	ATA_LAX (N = 12)	-	-	-	-	-	-	643.374	735.975	429.812	IAA_LAX (N = 16)	Large Diameter	417.137	488.343	378.25	RCCA_LAX (N = 16)	-			99.847	0.0975467	-	-	92.6006	0.14393	71.2062	0.170702		1.09755	0.102304	-	-	1.14393	0.154288	1.1707	0.185272
		2013-12-06	780	802.902	989.206	532.767	ATA_LAX2 (N = 30)	Good Images	-	-	-	-	-	460.063	545.305	421.182	IAA_LAX (N = 11)	-	234.475	328.533	586.727	RCCA_LAX (N = 22)	Small Diameter			186.304	0.232039	-	-	85.2414	0.185282	94.0583	0.401145		1.23204	0.25896	-	-	1.18528	0.202447	1.40115	0.481604
		2013-12-12	787	1107.13	1224.71	506.143	ATA_LAX2 (N = 14)	-	-	-	-	-	-	505.67	584.201	515.5	IAA_LAX (N = 18)	-	388.908	456.275	629	RCCA_LAX (N = 47)	-			117.581	0.106204	-	-	78.5317	0.155302	67.3673	0.173222		1.1062	0.111844	-	-	1.1553	0.167362	1.17322	0.188225
		2014-08-14	181	881.825	1147.4	436.412	ATA_LAX3 (N = 17)	-	-	-	-	-	-	-	-	-	-	No Images	-	-	-	-	Noisy Images			265.575	0.301165	-	-	-	-	-	-		1.30117	0.346515	-	-	-	-	-	-
		mean		972.276	1146.54	438.664	5		-	-	-	0		526.073	604.288	448.918	4		348.364	428.103	517.744	4				174.262	0.186017	-	-	78.2157	0.149648	79.7396	0.247416		1.18602	0.20628	-	-	1.14965	0.16117	1.24742	0.282403
		SD		125.612	102.082	81.3222			-	-	-			80.5962	89.4282	44.5616			80.3434	69.4292	112.924					67.0874	0.0860592	-	-	15.5825	0.0294379	12.5739	0.108059		0.0860592	0.102714	-	-	0.0294379	0.0338465	0.108059	0.139101
		SEM		56.1753	45.6524	36.3684			-	-	-			40.2981	44.7141	22.2808			40.1717	34.7146	56.4618					30.0024	0.0384869	-	-	7.79124	0.014719	6.28693	0.0540296		0.0384869	0.045935	-	-	0.014719	0.0169232	0.0540296	0.0695505
	F	2013-07-25	639	1001.1	1205.62	396.462	ATA_LAX (N = 13)	-	-	-	-	-	-	-	-	-	-	Noisy Images	441.071	486.615	587.6	RCCA_LAX (N = 5)	Selected Cycles			204.526	0.204302	-	-	-	-	45.5442	0.103258		1.2043	0.225171	-	-	-	-	1.10326	0.108589
		2013-07-25	640	1120.5	1226.45	457.522	ATA_LAX (N = 23)	-	-	-	-	-	-	483.519	596.379	482.8	IAA_LAX (N = 15)	-	365.254	446.249	445.571	RCCA_LAX (N = 14)	-			105.951	0.0945564	-	-	112.859	0.233413	80.9945	0.221748		1.09456	0.0990268	-	-	1.23341	0.260653	1.22175	0.246335
		2013-08-08	662	1116.62	1167.51	382.2	ATA_LAX1 (N = 10)	Noisy Images	-	-	-	-	-	351.791	454.581	393.429	IAA_LAX (N = 7)	-	356.247	411.847	434.444	RCCA_LAX (N = 9)	-			50.8901	0.0455751	-	-	102.79	0.29219	55.5993	0.156069		1.04558	0.0466136	-	-	1.29219	0.334877	1.15607	0.168248
		2013-08-09	667	994.012	1151.03	328.083	ATA_LAX2 (N = 12)	-	-	-	-	-	-	440.343	517.233	331.273	IAA_LAX (N = 22)	-	324.222	383.235	352.643	RCCA_LAX (N = 28)	Small Diameter			157.018	0.157963	-	-	76.8897	0.174613	59.0135	0.182016		1.15796	0.17044	-	-	1.17461	0.189858	1.18202	0.198581
		2014-08-05	193	1079.23	1281.09	399.111	ATA_LAX (N = 9)	Noisy Images	-	-	-	-	-	421.042	478.086	485.667	IAA_LAX (N = 3)	Selected Cycles	349.601	455.361	568.4	LCCA_LAX (N = 10)	-			201.853	0.187033	-	-	57.0444	0.135484	105.761	0.302518		1.18703	0.204524	-	-	1.13548	0.144662	1.30252	0.348277
		2014-08-26	198	1007.09	1109.95	346.824	ATA_LAX1 (N = 17)	-	-	-	-	-	-	-	-	-	-	Diameter too small!	367.495	436.459	419.833	LCCA_LAX (N = 18)	-			102.865	0.102141	-	-	-	-	68.9639	0.187659		1.10214	0.107358	-	-	-	-	1.18766	0.205267
		2014-11-04	241	788.692	1022.16	261.778	ATA_LAX (N = 9)	Different Session	-	-	-	-	-	-	-	-	-	-	345.207	417.8	485	LCCA_LAX (N = 18)	-			233.464	0.296014	-	-	-	-	72.5933	0.210289		1.29601	0.339826	-	-	-	-	1.21029	0.2324
		2014-11-11	251	941.268	1074.09	379	ATA_LAX1 (N = 14)	-	-	-	-	-	-	431.529	469.044	484.273	IAA_LAX (N = 11)	-	345.359	460.538	497.091	LCCA_LAX (N = 11)	-			132.824	0.141111	-	-	37.5151	0.0869351	115.179	0.333505		1.14111	0.151068	-	-	1.08694	0.090714	1.33351	0.389118
		mean		1006.06	1154.74	368.872	8		-	-	-	0		425.645	503.065	435.488	5		361.807	437.263	473.823	8				148.674	0.153587	-	-	77.4197	0.184527	75.456	0.212133		1.15359	0.168003	-	-	1.18453	0.204153	1.21213	0.237102
		SD		108.426	84.4826	57.8589			-	-	-			47.6331	57.0968	70.296			34.7761	32.3597	77.9237					62.0404	0.0774124	-	-	31.2547	0.0806362	24.3095	0.0751184		0.0774124	0.0907027	-	-	0.0806362	0.0960378	0.0751184	0.0920634
		SEM		38.3344	29.8691	20.4562			-	-	-			21.3022	25.5345	31.4373			12.2952	11.4409	27.5502					21.9346	0.0273694	-	-	13.9775	0.0360616	8.5947	0.0265583		0.0273694	0.0320683	-	-	0.0360616	0.0429494	0.0265583	0.0325493
	t-test			0.633282	0.884547	0.141221			-	-	-			0.0829823	0.107827	0.738053			0.766786	0.815523	0.519021					0.510382	0.5119	-	-	0.961919	0.409704	0.696047	0.585912		0.5119	0.514245	-	-	0.409704	0.393186	0.585912	0.584414
		t-tests		ATA					SAA					IAA					CCA							Circumferential Displacements & Linear Strains									Stretches & Green Strains
				Inner Diameter (µm)		HR (bpm)	Comments		Inner Diameter (µm)		HR (bpm)	Comments		Inner Diameter (µm)		HR (bpm)	Comments		Inner Diameter (µm)		HR (bpm)	Comments				ATA		SAA		IAA		CCA			ATA		SAA		IAA		CCA
				diastole	systole				diastole	systole				diastole	systole				diastole	systole						∆id (µm)	εϑ	∆id (µm)	εϑ	∆id (µm)	εϑ	∆id (µm)	εϑ		idsys/iddia	Eϑϑ	idsys/iddia	Eϑϑ	idsys/iddia	Eϑϑ	idsys/iddia	Eϑϑ
	M	Un-WT vs Un-KO		0.026848	0.000706346	0.658913			-	-	-			0.435273	0.224939	0.873564			0.544612	0.515951	0.604733					0.00567353	0.0346181	-	-	0.294324	0.612939	0.707139	0.65116		0.0346181	0.0311438	-	-	0.612939	0.599146	0.65116	0.62834
		Un-WT vs Un-OLD		0.104168	0.738349	0.112805			-	-	-			0.320869	0.291743	0.362231			0.0271492	0.0283055	0.327326					0.00526697	0.00225776	-	-	0.533421	0.387894	0.221414	0.78875		0.00225776	0.00230046	-	-	0.387894	0.383965	0.78875	0.788203
		Un-WT vs Tr-WT		0.433834	0.204527	0.962323			-	-	-			0.351531	0.343655	0.594228			0.869662	0.75652	0.984983					0.311803	0.991821	-	-	0.686658	0.572708	0.653173	0.633054		0.991821	0.905537	-	-	0.572708	0.572272	0.633054	0.60207
		Un-KO vs Tr-KO		0.455212	0.775656	0.402642			-	-	-			0.570744	0.445712	0.308918			0.591202	0.430258	0.542479					0.33167	0.318499	-	-	0.360711	0.567534	0.977144	0.977321		0.318499	0.315928	-	-	0.567534	0.547223	0.977321	0.967437
	F	Un-WT vs Un-KO		0.0654501	0.0206142	0.180308			-	-	-			0.184017	0.125784	0.690844			0.385385	0.101602	0.951796					0.495777	0.7688	-	-	0.859786	0.870162	0.0991368	0.286784		0.7688	0.799869	-	-	0.870162	0.876236	0.286784	0.291824
		Un-WT vs Un-OLD		0.135642	0.0175459	0.501988			-	-	-			0.0838067	0.120043	0.607813			0.04603	0.0496057	0.761345					0.49243	0.79649	-	-	0.649547	0.252318	0.80515	0.314788		0.79649	0.805423	-	-	0.252318	0.244147	0.314788	0.316793
		Un-WT vs Tr-WT		0.659038	0.785376	0.581659			-	-	-			0.0146766	0.0119298	0.391689			0.218919	0.209378	0.525666					0.885352	0.764351	-	-	0.905757	0.405007	0.75121	0.266248		0.764351	0.771903	-	-	0.405007	0.401346	0.266248	0.266154
		Un-KO vs Tr-KO		0.823821	0.929968	0.102113			-	-	-			0.0314535	0.0337812	0.949059			0.187047	0.0452783	0.430668					0.725234	0.743687	-	-	0.60475	0.885093	0.265442	0.508739		0.743687	0.730042	-	-	0.885093	0.868024	0.508739	0.507473
Un-WT		Test Dates	Mouse #	ATA					SAA					IAA					CCA							Circumferential Displacements & Linear Strains									Circumferential Stretches & Green Strains
				Inner Diameter (µm)		HR (bpm)	Data File	Comments	Inner Diameter (µm)		HR (bpm)	Data File	Comments	Inner Diameter (µm)		HR (bpm)	Data File	Comments	Inner Diameter (µm)		HR (bpm)	Data File	Comments			ATA		SAA		IAA		CCA			ATA		SAA		IAA		CCA
				diastole	systole				diastole	systole				diastole	systole				diastole	systole						∆id (µm)	εϑ	∆id (µm)	εϑ	∆id (µm)	εϑ	∆id (µm)	εϑ		idsys/iddia	Eϑϑ	idsys/iddia	Eϑϑ	idsys/iddia	Eϑϑ	idsys/iddia	Eϑϑ
Lmna +/+ @ 20 wks	M
		mean		#DIV/0!	#DIV/0!	#DIV/0!	0		#DIV/0!	#DIV/0!	#DIV/0!	0		#DIV/0!	#DIV/0!	#DIV/0!	0		#DIV/0!	#DIV/0!	#DIV/0!	0				#DIV/0!	#DIV/0!	-	-	#DIV/0!	#DIV/0!	#DIV/0!	#DIV/0!		#DIV/0!	#DIV/0!	-	-	#DIV/0!	#DIV/0!	#DIV/0!	#DIV/0!
		SD		#DIV/0!	#DIV/0!	#DIV/0!			#DIV/0!	#DIV/0!	#DIV/0!			#DIV/0!	#DIV/0!	#DIV/0!			#DIV/0!	#DIV/0!	#DIV/0!					#DIV/0!	#DIV/0!	-	-	#DIV/0!	#DIV/0!	#DIV/0!	#DIV/0!		#DIV/0!	#DIV/0!	-	-	#DIV/0!	#DIV/0!	#DIV/0!	#DIV/0!
		SEM		#DIV/0!	#DIV/0!	#DIV/0!			#DIV/0!	#DIV/0!	#DIV/0!			#DIV/0!	#DIV/0!	#DIV/0!			#DIV/0!	#DIV/0!	#DIV/0!					#DIV/0!	#DIV/0!	-	-	#DIV/0!	#DIV/0!	#DIV/0!	#DIV/0!		#DIV/0!	#DIV/0!	-	-	#DIV/0!	#DIV/0!	#DIV/0!	#DIV/0!
	F	2018-12-07	P165	1184.85	1480.04	388								386.319	451.957	434										295.19	0.249138			65.638	0.169906				1.24914	0.280172			1.16991	0.18434
		2018-12-07	P166
		2019-03-08	P1120
		mean		1184.85	1480.04	388	1		#DIV/0!	#DIV/0!	#DIV/0!	0		386.319	451.957	434	1		#DIV/0!	#DIV/0!	#DIV/0!	0				295.19	0.249138	-	-	65.638	0.169906	#DIV/0!	#DIV/0!		1.24914	0.280172	-	-	1.16991	0.18434	#DIV/0!	#DIV/0!
		SD		#DIV/0!	#DIV/0!	#DIV/0!			#DIV/0!	#DIV/0!	#DIV/0!			#DIV/0!	#DIV/0!	#DIV/0!			#DIV/0!	#DIV/0!	#DIV/0!					#DIV/0!	#DIV/0!	-	-	#DIV/0!	#DIV/0!	#DIV/0!	#DIV/0!		#DIV/0!	#DIV/0!	-	-	#DIV/0!	#DIV/0!	#DIV/0!	#DIV/0!
		SEM		#DIV/0!	#DIV/0!	#DIV/0!			#DIV/0!	#DIV/0!	#DIV/0!			#DIV/0!	#DIV/0!	#DIV/0!			#DIV/0!	#DIV/0!	#DIV/0!					#DIV/0!	#DIV/0!	-	-	#DIV/0!	#DIV/0!	#DIV/0!	#DIV/0!		#DIV/0!	#DIV/0!	-	-	#DIV/0!	#DIV/0!	#DIV/0!	#DIV/0!
	t-test			#REF!	#REF!	#REF!			#REF!	#DIV/0!	#DIV/0!			#REF!	#REF!	#REF!			#DIV/0!	#DIV/0!	#DIV/0!					#REF!	#REF!	-	-	#REF!	#REF!	#DIV/0!	#DIV/0!		#REF!	#REF!	-	-	#REF!	#REF!	#DIV/0!	#DIV/0!
Un-WT		Test Dates	Mouse #	ATA					SAA					IAA					CCA							Circumferential Displacements & Linear Strains									Circumferential Stretches & Green Strains
				Inner Diameter (µm)		HR (bpm)	Data File	Comments	Inner Diameter (µm)		HR (bpm)	Data File	Comments	Inner Diameter (µm)		HR (bpm)	Data File	Comments	Inner Diameter (µm)		HR (bpm)	Data File	Comments			ATA		SAA		IAA		CCA			ATA		SAA		IAA		CCA
				diastole	systole				diastole	systole				diastole	systole				diastole	systole						∆id (µm)	εϑ	∆id (µm)	εϑ	∆id (µm)	εϑ	∆id (µm)	εϑ		idsys/iddia	Eϑϑ	idsys/iddia	Eϑϑ	idsys/iddia	Eϑϑ	idsys/iddia	Eϑϑ
Lmna G609G/G609G @ 20 wks	M
		mean		#DIV/0!	#DIV/0!	#DIV/0!	0		#DIV/0!	#DIV/0!	#DIV/0!	0		#DIV/0!	#DIV/0!	#DIV/0!	0		#DIV/0!	#DIV/0!	#DIV/0!	0				#DIV/0!	#DIV/0!	-	-	#DIV/0!	#DIV/0!	#DIV/0!	#DIV/0!		#DIV/0!	#DIV/0!	-	-	#DIV/0!	#DIV/0!	#DIV/0!	#DIV/0!
		SD		#DIV/0!	#DIV/0!	#DIV/0!			#DIV/0!	#DIV/0!	#DIV/0!			#DIV/0!	#DIV/0!	#DIV/0!			#DIV/0!	#DIV/0!	#DIV/0!					#DIV/0!	#DIV/0!	-	-	#DIV/0!	#DIV/0!	#DIV/0!	#DIV/0!		#DIV/0!	#DIV/0!	-	-	#DIV/0!	#DIV/0!	#DIV/0!	#DIV/0!
		SEM		#DIV/0!	#DIV/0!	#DIV/0!			#DIV/0!	#DIV/0!	#DIV/0!			#DIV/0!	#DIV/0!	#DIV/0!			#DIV/0!	#DIV/0!	#DIV/0!					#DIV/0!	#DIV/0!	-	-	#DIV/0!	#DIV/0!	#DIV/0!	#DIV/0!		#DIV/0!	#DIV/0!	-	-	#DIV/0!	#DIV/0!	#DIV/0!	#DIV/0!
	F	2017-12-08	P91	888.268	1057.01	500							Bad images	396.736	466.615	564										168.746	0.189972			69.8792	0.176135				1.18997	0.208016			1.17614	0.191647
		2017-12-08	P92	856.513	1019.5	794							No image?	388.17	464.535	435										162.988	0.190293			76.3653	0.196732				1.19029	0.208399			1.19673	0.216084
		2017-12-08	P98	946.357	1121.64	420							Bad images	385.336	456.156	422										175.279	0.185214			70.8192	0.183785				1.18521	0.202367			1.18379	0.200674
		2018-01-04	P110	916.543	1063.04	452								418.543	476.513	448										146.497	0.159837			57.9701	0.138505				1.15984	0.17261			1.1385	0.148096
		2018-01-04	P115	924.188	1170.55	622								334.023	429.229	410										246.36	0.266569			95.2057	0.285027				1.26657	0.302098			1.28503	0.325648
		mean		906.374	1086.35	557.6	5		#DIV/0!	#DIV/0!	#DIV/0!	0		384.562	458.61	455.8	5		#DIV/0!	#DIV/0!	#DIV/0!	0				179.974	0.198377	-	-	74.0479	0.196037	#DIV/0!	#DIV/0!		1.19838	0.218698	-	-	1.19604	0.21643	#DIV/0!	#DIV/0!
		SD		34.761	59.5968	152.836			#DIV/0!	#DIV/0!	#DIV/0!			31.1075	17.9512	62.1305			#DIV/0!	#DIV/0!	#DIV/0!					38.6148	0.0401396	-	-	13.5952	0.0542584	#DIV/0!	#DIV/0!		0.0401396	0.0489044	-	-	0.0542584	0.0660691	#DIV/0!	#DIV/0!
		SEM		15.5456	26.6525	68.3503			#DIV/0!	#DIV/0!	#DIV/0!			13.9117	8.02804	27.7856			#DIV/0!	#DIV/0!	#DIV/0!					17.2691	0.017951	-	-	6.07997	0.0242651	#DIV/0!	#DIV/0!		0.017951	0.0218707	-	-	0.0242651	0.029547	#DIV/0!	#DIV/0!
	t-test			0.00419433	0.000355781	0.425107			#DIV/0!	#DIV/0!	#DIV/0!			0.000384052	0.000101302	0.760857			#DIV/0!	#DIV/0!	#DIV/0!					0.312808	0.977678	-	-	0.25093	0.511274	#DIV/0!	#DIV/0!		0.977678	0.944536	-	-	0.511274	0.522268	#DIV/0!	#DIV/0!

## Sheet: ATA Biaxial Motion
Un-WT		Test Dates	Mouse #	Long Axis B-Mode													Displacements & Linear Strains					Stretches & Green Strains
				Inner Diameter (µm)		HR (bpm)	Data File	Comments	Axial Length (mm)		Outer Curvature Length (mm)		HR (bpm)	Data File	Comments		Inner Diameter		Axial Length (mm)			Inner Diameter		Axial Length (mm)
				diastole	systole				diastole	systole	diastole	systole					∆id (µm)	εϑ	∆l (mm)	εz		idsys/iddia	Eϑϑ	lsys/ldia	Ezz
Fbln5 +/+ @ 20-22 wks (Untreated)	M	2013-06-14	577	1438.7	1545.4	356	ATA_LAX4 (N = 4)	-	4.4917	4.76763	4.37158	4.82201	356	ATA_LAX4 (N = 4)	-		106.698	0.074163	0.275932	0.0614316		1.07416	0.0769131	1.06143	0.0633185
		2013-06-07	587	1284.93	1443.39	371.333	ATA_LAX2 (N = 3)	-	4.49609	4.73629	4.20345	4.59467	371.333	ATA_LAX3 (N = 3)	-		158.461	0.123323	0.240207	0.0534258		1.12332	0.130927	1.05343	0.054853
		2013-06-10	592	1277.63	1520.83	450.25	ATA_LAX1 (N = 4)	-	4.34468	4.53111	4.2475	4.52076	450.25	ATA_LAX4 (N = 4)	-		243.197	0.19035	0.186424	0.0429086		1.19035	0.208466	1.04291	0.0438292
		2013-06-14	593	1341.24	1478.79	465	ATA_LAX1 (N = 3)	-	4.35892	4.71727	4.34874	4.54585	465	ATA_LAX1 (N = 3)	-		137.55	0.102554	0.358358	0.0822126		1.10255	0.107812	1.08221	0.085592
		2013-06-17	600	1306.42	1510.56	533.5	ATA_LAX4 (N = 4)	-	4.29509	4.3975	4.44415	4.72678	533.5	ATA_LAX5 (N = 4)	-		204.14	0.156259	0.10241	0.0238434		1.15626	0.168468	1.02384	0.0241277
		mean		1329.78	1499.79	435.217	5		4.3973	4.62996	4.32309	4.64201	435.217	5			170.009	0.12933	0.232666	0.0527644		1.12933	0.138517	1.05276	0.0543441
		SD		65.7106	39.5614	72.6791			0.0913204	0.159445	0.0970736	0.128235	72.6791				54.1217	0.0454011	0.0959586	0.0216582		0.0454011	0.0514426	0.0216582	0.022808
		SEM		29.3867	17.6924	32.5031			0.0408397	0.071306	0.0434126	0.0573482	32.5031				24.204	0.020304	0.042914	0.00968585		0.020304	0.0230058	0.00968585	0.0102001
	F	2013-06-03	572	-	-	-	-	-	-	-	-	-	-	-	Poor Tracking		-	-	-	-		-	-	-	-
		2013-06-06	580	1266.16	1475.75	377.333	ATA_LAX4 (N = 3)	-	4.10264	4.3214	4.06697	4.25572	377.333	ATA_LAX4 (N = 3)	Motion Artifact		209.587	0.165529	0.218762	0.0533223		1.16553	0.179229	1.05332	0.054744
		2013-06-07	588	1206.95	1358.59	373.833	ATA_LAX2 (N = 6)	-	3.97351	4.40644	3.71455	4.24161	373.833	ATA_LAX2 (N = 6)	-		151.641	0.12564	0.432923	0.108952		1.12564	0.133533	1.10895	0.114888
		2013-06-17	602	-	-	-	-	-	-	-	-	-	-	-	-		-	-	-	-		-	-	-	-
		2013-06-17	603	1211	1315.23	442.25	ATA_LAX4 (N = 4)	-	3.87296	3.96283	3.69099	3.81136	442.25	ATA_LAX6 (N = 4)	-		104.229	0.0860684	0.0898722	0.0232051		1.08607	0.0897723	1.02321	0.0234743
		2013-06-17	604	1170.43	1314.86	427.75	ATA_LAX4 (N = 4)	-	4.18778	4.36273	4.00517	4.17249	427.75	ATA_LAX6 (N = 4)	-		144.426	0.123395	0.174953	0.0417771		1.1234	0.131009	1.04178	0.0426498
		2013-06-24	606	1327.16	1424.4	411.75	ATA_LAX3 (N = 4)	-	4.28532	4.38682	4.44093	4.55052	411.75	ATA_LAX2 (N = 4)	-		97.2372	0.0732671	0.101499	0.0236854		1.07327	0.0759512	1.02369	0.0239659
		2013-06-20	612	1268.47	1385.97	531.5	ATA_LAX1 (N = 4)	-	4.0597	4.42769	4.19894	4.5056	531.5	ATA_LAX6 (N = 4)	-		117.499	0.0926311	0.36799	0.0906446		1.09263	0.0969214	1.09064	0.0947528
		mean		1241.7	1379.13	427.403	6		4.08032	4.31132	4.01959	4.25622	427.403	6			137.437	0.111089	0.231	0.0569311		1.11109	0.117736	1.05693	0.059079
		SD		56.2978	63.3505	57.7554			0.147582	0.174631	0.287463	0.266055	57.7554				41.4065	0.0338354	0.14108	0.0355758		0.0338354	0.0378638	0.0355758	0.0378855
		SEM		22.9835	25.8627	23.5785			0.06025	0.0712929	0.117356	0.108616	23.5785				16.9041	0.0138132	0.0575957	0.0145238		0.0138132	0.0154578	0.0145238	0.0154667
	t-test			0.0458851	0.00438451	0.850793			0.00214752	0.0117279	0.0494621	0.015086	0.850793				0.304305	0.480797	0.982015	0.817095		0.480797	0.477024	0.817095	0.804485
Un-KO		Test Dates	Mouse #	Long Axis B-Mode													Displacements & Linear Strains					Stretches & Green Strains
				Inner Diameter (µm)		HR (bpm)	Data File	Comments	Axial Length (mm)		Outer Curvature Length (mm)		HR (bpm)	Data File	Comments		Inner Diameter		Axial Length (mm)			Inner Diameter		Axial Length (mm)
				diastole	systole				diastole	systole	diastole	systole					∆id (µm)	εϑ	∆l (mm)	εz		idsys/iddia	Eϑϑ	lsys/ldia	Ezz
Fbln5 -/- @ 20-22 wks (Untreated)	M	2013-06-10	583	1187.86	1291.98	425.333	ATA_LAX2 (N = 3)	-	5.51344	5.71257	5.50757	5.7011	425.333	ATA_LAX1 (N = 3)	-		104.125	0.0876576	0.199128	0.0361168		1.08766	0.0914995	1.03612	0.036769
		2013-06-10	591	1088.16	1251.42	322	ATA_LAX1 (N = 3)	-	5.13163	5.48077	5.12302	5.59511	322	ATA_LAX2 (N = 3)	Hidden Branch		163.261	0.150034	0.349133	0.0680355		1.15003	0.161289	1.06804	0.0703499
		2013-06-14	594	1075.7	1176.01	351	ATA_LAX1 (N = 4)	-	4.89797	5.14132	4.71767	5.08739	351	ATA_LAX1 (N = 4)	-		100.311	0.0932517	0.243346	0.049683		1.09325	0.0975997	1.04968	0.0509172
		2013-06-20	613	-	-	-	-	-	-	-	-	-	-	-	Poor Tracking		-	-	-	-		-	-	-	-
		2013-06-24	615	1179.85	1242.23	529.8	ATA_LAX3 (N = 5)	-	5.78526	5.894	5.5474	5.6471	529.8	ATA_LAX1 (N = 5)	-		62.3799	0.0528712	0.108747	0.0187972		1.05287	0.0542688	1.0188	0.0189739
		2013-06-24	619	1207.79	1279.2	467	ATA_LAX4 (N = 4)	-	5.65426	5.75695	5.43567	5.53205	467	ATA_LAX4 (N = 4)	-		71.4061	0.0591213	0.102693	0.0181621		1.05912	0.060869	1.01816	0.0183271
		mean		1147.87	1248.17	419.027	5		5.39651	5.59712	5.26627	5.51255	419.027	5			100.296	0.0885871	0.200609	0.0381589		1.08859	0.0931051	1.03816	0.0390674
		SD		61.208	45.0976	84.6371			0.370787	0.295089	0.349085	0.245773	84.6371				39.5331	0.0385427	0.102365	0.0212387		0.0385427	0.0424829	0.0212387	0.0221258
		SEM		27.3731	20.1683	37.8509			0.165821	0.131968	0.156115	0.109913	37.8509				17.6798	0.0172368	0.0457789	0.00949824		0.0172368	0.0189989	0.00949824	0.00989496
	F	2013-06-03	573	1161.84	1245.6	478.667	ATA_LAX1 (N = 3)	-	4.57106	4.93	4.7516	5.11399	478.667	ATA_LAX3 (N = 3)	-		83.7551	0.0720883	0.35894	0.0785245		1.07209	0.0746866	1.07852	0.0816076
		2013-06-07	589	-	-	-	-	-	-	-	-	-	-	-	Bad Images		-	-	-	-		-	-	-	-
		2013-06-07	609	1161.26	1239.34	367	ATA_LAX1 (N = 2)	-	4.9238	5.14539	4.81599	5.04009	369.5	ATA_LAX3 (N = 4)	-		78.0835	0.0672403	0.221593	0.0450044		1.06724	0.0695009	1.045	0.0460171
		2013-06-24	620	1194.82	1221.74	555.667	ATA_LAX1 (N = 3)	-	5.37849	5.49539	5.28923	5.41451	555.667	ATA_LAX5 (N = 3)	Shadowing		26.9213	0.0225316	0.116893	0.0217334		1.02253	0.0227855	1.02173	0.0219695
		2013-12-06	773	1120.22	1229.48	364.5	ATA_LAX2 (N = 4)	-	4.90755	5.36652	4.80238	5.17176	364.5	ATA_LAX2 (N = 4)	Shadowing		109.257	0.0975317	0.45897	0.0935231		1.09753	0.102288	1.09352	0.0978964
		2015-04-30	416	1090.17	1234.05	388.5	ATA_LAX3 (N = 4)	-	4.70525	4.94507	4.45971	4.57261	388.5	ATA_LAX2 (N = 4)	-		143.879	0.131978	0.239822	0.0509691		1.13198	0.140687	1.05097	0.052268
		2015-05-14	451	1200.79	1303.07	414.5	ATA_LAX5 (N = 4)	-	4.87098	5.06469	4.94726	5.20766	414.5	ATA_LAX5 (N = 4)	Hidden Branch		102.288	0.0851842	0.193708	0.0397677		1.08518	0.0888124	1.03977	0.0405584
		mean		1154.85	1245.55	428.139	6		4.89286	5.15784	4.84436	5.08677	428.556	6			90.6973	0.0794257	0.264988	0.0549204		1.07943	0.0831268	1.05492	0.0567195
		SD		42.8494	29.3424	75.3147			0.274316	0.229565	0.271156	0.281615	74.9147				38.9403	0.0362271	0.123276	0.0264282		0.0362271	0.0390145	0.0264282	0.027993
		SEM		17.4932	11.979	30.7471			0.111989	0.0937195	0.110699	0.114969	30.5838				15.8973	0.0147896	0.0503274	0.0107893		0.0147896	0.0159276	0.0107893	0.0114281
	t-test			0.835994	0.914394	0.856327			0.0387758	0.028053	0.0607128	0.0254288	0.84955				0.696275	0.696738	0.368729	0.273568		0.696738	0.697481	0.273568	0.27295
Un-OLD		Test Dates	Mouse #	Long Axis B-Mode													Displacements & Strains					Stretches & Green Strains
				Inner Diameter (µm)		HR (bpm)	Data File	Comments	Axial Length (mm)		Outer Curvature Length (mm)		HR (bpm)	Data File	Comments		Inner Diameter		Axial Length (mm)			Inner Diameter		Axial Length (mm)
				diastole	systole				diastole	systole	diastole	systole					∆id (µm)	εϑ	∆l (mm)	εz		idsys/iddia	Eϑϑ	lsys/ldia	Ezz
Fbln5 +/+ @ 100-110 wks (Untreated)	M	2015-05-14	722	1487.46	1626.7	517	ATA_LAX2 (N =3)	F23	5.10325	5.28239	4.94449	5.28546	517	ATA_LAX1 (N = 3)	F23 / Shadowing		139.233	0.0936043	0.179133	0.0351017		1.0936	0.0979852	1.0351	0.0357177
		2015-05-21	733	1290.45	1402.38	426.5	ATA_LAX3 (N = 2)	-	4.17006	4.51598	4.224	4.65965	426.5	ATA_LAX1 (N = 2)	Shadowing		111.925	0.0867337	0.345919	0.082953		1.08673	0.090495	1.08295	0.0863936
		2015-05-14	736	1317.88	1487.02	431.667	ATA_LAX1 (N = 3)	F21 / Dying Mouse	5.24012	5.52859	5.16876	5.53648	431.667	ATA_LAX1 (N = 3)	F21 / Dying Mouse		169.144	0.128346	0.288467	0.0550497		1.12835	0.136582	1.05505	0.0565649
		2015-04-30	740	1437.07	1636.44	478.5	ATA_LAX1 (N = 4)	F20	5.23339	5.36501	5.32301	5.44225	478.5	ATA_LAX2 (N = 4)	F20 / Strange Wave		199.367	0.138732	0.131623	0.0251506		1.13873	0.148355	1.02515	0.0254669
		2015-04-09	742	1503.19	1570.43	458.2	ATA_LAX1 (N = 5)	F17 / Strange Wave	5.41768	5.58918	5.26943	5.35607	458.2	ATA_LAX1 (N = 5)	F17 / Shadowing		67.2473	0.0447366	0.171507	0.031657		1.04474	0.0457372	1.03166	0.0321581
		2015-05-21	747	1432.27	1519.08	486.333	ATA_LAX4 (N = 3)	Strange Wave	-	-	-	-	-	ATA_LAX3 (N = 3)	BAD Wave & Values		86.8173	0.0606153	-	-		1.06062	0.0624524	-	-
		mean		1411.39	1540.34	466.367	6		5.0329	5.25623	4.98594	5.25598	462.373	5			128.956	0.0921279	0.22333	0.0459824		1.09213	0.0969345	1.04598	0.0472602
		SD		87.954	89.3605	34.5536			0.495134	0.431719	0.449909	0.346364	37.0518				50.1041	0.0367529	0.0898889	0.0234873		0.0367529	0.0401714	0.0234873	0.0247702
		SEM		35.9071	36.4813	14.1064			0.221431	0.19307	0.201206	0.154899	16.5701				20.4549	0.0150043	0.0401995	0.0105038		0.0150043	0.0163999	0.0105038	0.0110776
	F	2014-09-16	465	1284.24	1448.62	439.5	ATA_LAX2 (N = 4)	-	3.95285	4.21921	3.42945	3.8693	439.5	ATA_LAX2 (N = 4)	-		164.374	0.127993	0.266352	0.0673823		1.12799	0.136184	1.06738	0.0696525
		2014-11-18	484	1487.93	1668.48	427.5	ATA_LAX1 (N = 4)	-	5.03579	5.26492	4.40281	4.56033	427.5	ATA_LAX1 (N = 4)	-		180.549	0.121342	0.229131	0.0455006		1.12134	0.128704	1.0455	0.0465357
		2014-11-18	486	1363.51	1568.38	450.333	ATA_LAX4 (N = 3)	-	4.4367	4.58698	4.27051	4.57492	450.333	ATA_LAX4 (N = 3)	-		204.866	0.150249	0.150284	0.0338729		1.15025	0.161536	1.03387	0.0344466
		2014-12-04	492	1249.04	1410.62	551.333	ATA_LAX3 (N = 3)	Poor ECG signal	4.36212	4.70281	4.18391	4.66902	388	ATA_LAX1 (N = 3)	Poor ECG signal		161.58	0.129364	0.340689	0.0781018		1.12936	0.137731	1.0781	0.0811518
		2014-09-16	495	1396.77	1531.91	529.667	ATA_LAX7 (N = 3)	Top view	5.20783	5.37989	5.13288	5.30289	529.667	ATA_LAX3 (N = 3)	Top view		135.139	0.096751	0.17206	0.0330387		1.09675	0.101431	1.03304	0.0335845
		2014-12-11	501	1358.99	1431.79	388	ATA_LAX1 (N = 3)	F9	3.94141	4.1765	3.86105	4.27641	388	ATA_LAX2 (N = 3)	F9 / Shadowing		72.8034	0.0535717	0.235093	0.0596468		1.05357	0.0550066	1.05965	0.0614257
		2014-12-04	507	1229.85	1378.28	416.75	ATA_LAX1 (N = 4)	F8	4.54244	4.81976	4.3494	4.67148	416.75	ATA_LAX1 (N = 4)	F8 / Top view		148.423	0.120684	0.277322	0.0610512		1.12068	0.127966	1.06105	0.0629149
		2014-12-11	523	1509.01	1623.92	429.5	ATA_LAX3 (N = 4)	-	4.42614	4.71305	4.33278	4.64039	429.5	ATA_LAX2 (N = 4)	-		114.907	0.0761473	0.286909	0.0648214		1.07615	0.0790465	1.06482	0.0669223
		2014-10-21	524	-	-	-	ATA_LAX2 (N = 3)	Dying / Small Aorta	-	-	-	-	-	ATA_LAX2 (N = 3)	Dying / Small Aorta		-	-	-	-		-	-	-	-
		2015-04-30	732	1486.68	1590.98	493.75	ATA_LAX1 (N = 4)	F9	4.7232	4.96618	4.82496	5.13746	493.75	ATA_LAX1 (N = 4)	F9 / Shadowing		104.294	0.070152	0.242986	0.0514452		1.07015	0.0726127	1.05145	0.0527685
		mean		1374	1517	458.481	9		4.51427	4.75881	4.30975	4.63358	440.333	9			142.993	0.105139	0.244536	0.0549846		1.10514	0.111135	1.05498	0.0566003
		SD		105.6	103.205	54.6218			0.429789	0.411342	0.493378	0.422066	46.4358				40.8435	0.0324853	0.0581559	0.015302		0.0324853	0.0357513	0.015302	0.0161219
		SEM		35.2	34.4018	18.2073			0.143263	0.137114	0.164459	0.140689	15.4786				13.6145	0.0108284	0.0193853	0.00510067		0.0108284	0.0119171	0.00510067	0.00537397
	t-test			0.471303	0.649903	0.737561			0.0877233	0.0687465	0.0283935	0.0140286	0.353627				0.581391	0.498166	0.651701	0.470265		0.498166	0.499679	0.470265	0.477105
Tr-WT		Test Dates	Mouse #	Long Axis B-Mode													Displacements & Strains					Stretches & Green Strains
				Inner Diameter (µm)		HR (bpm)	Data File	Comments	Axial Length (mm)		Outer Curvature Length (mm)		HR (bpm)	Data File	Comments		Inner Diameter		Axial Length (mm)			Inner Diameter		Axial Length (mm)
				diastole	systole				diastole	systole	diastole	systole					∆id (µm)	εϑ	∆l (mm)	εz		idsys/iddia	Eϑϑ	lsys/ldia	Ezz
Fbln5 +/+ @ 20-22 wks (NaCl & L-NAME)	M	2013-07-25	645	1325.08	1524.01	368.75	ATA_LAX1 (N = 4)	F10	3.79325	4.18517	3.77854	4.09164	368.75	ATA_LAX1 (N = 4)	F10		198.932	0.150128	0.391915	0.103319		1.15013	0.161397	1.10332	0.108656
		2013-07-29	653	1295.47	1360.97	392.5	ATA_LAX1 (N = 4)	F11 / Poor tracking	3.57048	3.62528	3.07814	3.17698	392.5	ATA_LAX1 (N = 4)	F11 / Poor tracking		65.4997	0.0505605	0.0548019	0.0153486		1.05056	0.0518386	1.01535	0.0154664
		2013-07-29	656	1348.82	1369.77	454.5	ATA_LAX3 (N = 4)	F13 / Low Temp Res	5.53686	5.54912	5.27775	5.33811	454.5	ATA_LAX1 (N = 4)	F13 / Poor tracking		20.9546	0.0155355	0.0122526	0.00221291		1.01554	0.0156562	1.00221	0.00221535
		2013-08-26	670	1393.2	1477.04	367.8	ATA_LAX3 (N = 5)	F15 / Weird Wave	4.48647	4.64518	4.02514	4.17833	367.8	ATA_LAX3 (N = 5)	F15		83.8425	0.06018	0.158712	0.0353756		1.06018	0.0619908	1.03538	0.0360014
		2013-12-06	779	1227.85	1346.55	486.5	ATA_LAX3 (N = 4)	F13	4.18297	4.36711	3.85406	3.97157	486.5	ATA_LAX1 (N = 4)	F13		118.695	0.0966693	0.184145	0.0440225		1.09667	0.101342	1.04402	0.0449915
		2014-08-21	182	1142.53	1425.18	313.75	ATA_LAX1 (N = 4)	F15	3.43296	3.76264	2.9591	3.24952	313.75	ATA_LAX1 (N = 4)	F15		282.649	0.24739	0.329678	0.0960332		1.24739	0.27799	1.09603	0.100644
		2014-08-21	184	1297.5	1462.02	383	ATA_LAX1 (N = 2)	F8 / Selected Cycles	4.13985	4.28951	4.01154	4.22882	383	ATA_LAX1 (N = 2)	F8 / Selected Cycles		164.512	0.126791	0.149656	0.0361501		1.12679	0.134829	1.03615	0.0368035
		2014-08-12	188	1109.23	1282.86	522	ATA_LAX1 (N = 4)	F19	3.63225	3.7559	3.3336	3.43712	522	ATA_LAX1 (N = 4)	F19		173.635	0.156537	0.123647	0.0340415		1.15654	0.168789	1.03404	0.0346209
		2014-08-12	190	1309.24	1538.04	419.5	ATA_LAX1 (N = 4)	F14	3.90925	4.16609	3.47944	3.74023	419.5	ATA_LAX1 (N = 4)	F14		228.801	0.174758	0.256839	0.0657002		1.17476	0.190028	1.0657	0.0678585
		2014-08-05	192	1217.23	1391.79	408.75	ATA_LAX2 (N = 4)	F16	3.52263	3.71505	3.20359	3.43178	408.75	ATA_LAX1 (N = 4)	F16		174.556	0.143404	0.192412	0.0546217		1.1434	0.153686	1.05462	0.0561135
		2014-11-04	256	1223.98	1296.37	664.4	ATA_LAX4 (N = 5)	F12	3.80182	3.96272	3.44078	3.62208	664.4	ATA_LAX3 (N = 5)	F12		72.3878	0.0591413	0.160901	0.0423221		1.05914	0.0608901	1.04232	0.0432177
		2014-11-11	257	1056.67	1309.81	364	ATA_LAX1 (N = 3)	F17	3.68745	3.96509	3.87564	4.17024	364	ATA_LAX2 (N = 3)	F17		253.135	0.239558	0.277641	0.0752934		1.23956	0.268252	1.07529	0.0781279
		mean		1245.57	1398.7	428.787	12		3.97469	4.16574	3.69311	3.88637	428.787	12			153.133	0.126721	0.19105	0.0503701		1.12672	0.137224	1.05037	0.0520598
		SD		102.02	86.7529	93.8324			0.580049	0.531464	0.616767	0.591496	93.8324				81.6112	0.07347	0.108788	0.0303125		0.07347	0.0833792	0.0303125	0.0319881
		SEM		29.4506	25.0434	27.0871			0.167446	0.15342	0.178045	0.17075	27.0871				23.5591	0.021209	0.0314044	0.00875046		0.021209	0.0240695	0.00875046	0.00923418
	F	2013-07-25	641	1167.56	1388.25	494	ATA_LAX5 (N = 4)	F16	3.82851	3.9918	3.53978	3.65419	494	ATA_LAX3 (N = 4)	F16		220.69	0.189018	0.163286	0.0426501		1.18902	0.206882	1.04265	0.0435596
		2013-08-08	663	1229.28	1268.4	507.25	ATA_LAX2 (N = 4)	F2 / Poor tracking	4.41047	4.70731	4.44139	4.65424	507.25	ATA_LAX2 (N = 4)	F2		39.1187	0.0318224	0.296844	0.0673045		1.03182	0.0323287	1.0673	0.0695695
		2013-08-09	668	1218.8	1416.17	436.25	ATA_LAX2 (N = 4)	F7	3.34043	3.61114	3.3958	3.58753	436.25	ATA_LAX2 (N = 4)	F7		197.374	0.161942	0.270716	0.0810424		1.16194	0.175054	1.08104	0.0843263
		2013-08-26	673	1201.03	1417.85	313.5	ATA_LAX3 (N = 4)	F5	4.68083	4.96581	4.20954	4.37749	313.5	ATA_LAX1 (N = 4)	F5		216.817	0.180525	0.284983	0.060883		1.18053	0.19682	1.06088	0.0627363
		2013-08-26	675	1088.78	1216.74	353.5	ATA_LAX1 (N = 4)	F5	3.79128	3.90953	3.41618	3.51676	353.5	ATA_LAX2 (N = 4)	F5		127.966	0.117532	0.118253	0.0311908		1.11753	0.124438	1.03119	0.0316773
		2013-12-12	790	1007.48	1222.4	375.25	ATA_LAX1 (N = 4)	F16	4.0541	4.35156	3.65649	4.02823	375.25	ATA_LAX1 (N = 4)	F16		214.918	0.213323	0.297452	0.0733706		1.21332	0.236076	1.07337	0.0760622
		2014-08-19	195	1165.11	1306.71	422.75	ATA_LAX1 (N = 4)	F19	3.43007	3.83263	3.18936	3.58101	422.75	ATA_LAX1 (N = 4)	F19		141.599	0.121533	0.402559	0.117362		1.12153	0.128918	1.11736	0.124249
		2014-08-26	199	1177.59	1359.07	296.75	ATA_LAX1 (N = 4)	F8	4.39499	4.81396	4.319	4.75541	296.75	ATA_LAX1 (N = 4)	F8		181.482	0.154114	0.418968	0.0953285		1.15411	0.165989	1.09533	0.0998723
		2014-11-04	240	1235.66	1389.59	516.75	ATA_LAX2 (N = 4)	F18	4.67228	4.90714	4.77167	4.88185	516.75	ATA_LAX4 (N = 4)	F18		153.93	0.124573	-	-		1.12457	0.132332	-	-
		2014-11-11	250	1174.41	1327.65	457.5	ATA_LAX3 (N = 4)	F10	3.36209	3.70756	3.03441	3.28582	457.5	ATA_LAX2 (N = 4)	F10		153.241	0.130483	0.34547	0.102755		1.13048	0.138996	1.10275	0.108034
		mean		1166.57	1331.28	417.35	10		3.9965	4.27984	3.79736	4.03225	417.35	10			164.714	0.142486	0.288726	0.074654		1.14249	0.153784	1.07465	0.0777873
		SD		70.0557	75.7663	79.5923			0.525204	0.530405	0.591659	0.588602	79.5923				55.4008	0.0504611	0.0990059	0.0279295		0.0504611	0.0567202	0.0279295	0.0299974
		SEM		22.1536	23.9594	25.1693			0.166084	0.167729	0.187099	0.186132	25.1693				17.5193	0.0159572	0.033002	0.00930983		0.0159572	0.0179365	0.00930983	0.00999912
	t-test			0.044952	0.0659975	0.760276			0.927227	0.621362	0.69085	0.57023	0.760276				0.69758	0.559387	0.0457763	0.0733919		0.559387	0.587509	0.0733919	0.0749725
Tr-KO		Test Dates	Mouse #	Long Axis B-Mode													Displacements & Strains					Stretches & Green Strains
				Inner Diameter (µm)		HR (bpm)	Data File	Comments	Axial Length (mm)		Outer Curvature Length (mm)		HR (bpm)	Data File	Comments		Inner Diameter		Axial Length (mm)			Inner Diameter		Axial Length (mm)
				diastole	systole				diastole	systole	diastole	systole					∆id (µm)	εϑ	∆l (mm)	εz		idsys/iddia	Eϑϑ	lsys/ldia	Ezz
Fbln5 -/- @ 20-22 wks (NaCl & L-NAME)	M	2013-08-16	678	1002.48	1189.42	364	ATA_LAX3 (N = 3)	F19	6.46938	6.67431	6.22877	6.43579	364	ATA_LAX2 (N = 3)	F19		186.931	0.186467	0.204924	0.031676		1.18647	0.203853	1.03168	0.0321776
		2013-08-16	679	1042.15	1166.69	342.5	ATA_LAX2 (N = 4)	F11	7.07358	7.2041	6.66695	6.8155	342.5	ATA_LAX3 (N = 4)	F11		124.538	0.119501	0.13052	0.0184518		1.1195	0.126641	1.01845	0.0186221
		2013-12-06	780	879.801	1002.98	555.667	ATA_LAX1 (N = 6)	F34	-	-	-	-	-	-	Tortuous+Shadowing		123.178	0.140007	-	-		1.14001	0.149808	-	-
		2013-12-12	787	1058.61	1201.04	294	ATA_LAX1 (N = 4)	F9 / Near BCA	6.00742	6.46195	5.76073	6.18197	294	ATA_LAX1 (N = 4)	F9		142.43	0.134545	0.454525	0.0756606		1.13454	0.143596	1.07566	0.0785228
		2014-08-14	181	1160.18	1292.79	477.25	ATA_LAX7 (N = 4)	F55 / Root	6.42931	6.61746	6.49499	6.68885	477.25	ATA_LAX3 (N = 4)	F55		132.611	0.114302	0.188143	0.0292633		1.1143	0.120835	1.02926	0.0296915
		mean		1028.65	1170.58	406.683	5		6.49492	6.73945	6.28786	6.53053	369.438	4			141.938	0.138964	0.244528	0.0387629		1.13896	0.148946	1.03876	0.0397535
		SD		101.514	105.265	107.022			0.438732	0.322507	0.394957	0.280915	77.6092				26.2977	0.0285667	0.143578	0.0252616		0.0285667	0.0329084	0.0252616	0.0265093
		SEM		45.3984	47.0759	47.8616			0.219366	0.161254	0.197479	0.140458	38.8046				11.7607	0.0127754	0.0717891	0.0126308		0.0127754	0.0147171	0.0126308	0.0132547
	F	2013-07-25	639	1094.74	1221.41	436.25	ATA_LAX2 (N = 4)	F12	6.12424	6.28089	5.96213	6.10789	436.25	ATA_LAX4 (N = 4)	F12 / Shadowing		126.67	0.115708	0.156646	0.0255779		1.11571	0.122402	1.02558	0.0259051
		2013-07-25	640	1017.19	1113.48	489.5	ATA_LAX4 (N = 4)	F19	4.6265	4.71304	4.47672	4.61804	489.5	ATA_LAX3 (N = 4)	F19 / Shadowing		96.2961	0.0946689	0.0865352	0.0187042		1.09467	0.09915	1.0187	0.0188792
		2013-08-08	662	-	-	-	-	-	-	-	-	-	-	-	-		-	-	-	-		-	-	-	-
		2013-08-09	667	1084.17	1143.68	342.5	ATA_LAX4 (N = 4)	F14	5.12159	5.37081	4.93971	5.17174	342.5	ATA_LAX2 (N = 4)	F14 / Uncertain BCA		59.515	0.0548946	0.249215	0.0486597		1.05489	0.0564014	1.04866	0.0498436
		2014-08-05	193	1099.49	1214.22	398.75	ATA_LAX2 (N = 4)	F7	6.02626	6.43787	5.97139	6.42799	398.75	ATA_LAX2 (N = 4)	F7		114.732	0.104351	0.411606	0.068302		1.10435	0.109795	1.0683	0.0706346
		2014-08-26	198	1110.07	1164.13	372.75	ATA_LAX2 (N = 4)	F3 / To Adjust	6.2845	6.42528	6.11251	6.21859	372.75	ATA_LAX1 (N = 4)	F3 / To Adjust		54.0621	0.0487014	0.140781	0.0224013		1.0487	0.0498874	1.0224	0.0226522
		2014-11-04	241	-	-	-	-	No B-Mode	-	-	-	-	-	-	No B-Mode		-	-	-	-		-	-	-	-
		2014-11-11	251	915.873	1000.23	465	ATA_LAX1 (N = 5)	F26	-	-	-	-	-	-	Shadowing		84.3538	0.092102	-	-		1.0921	0.0963434	-	-
		mean		1053.59	1142.86	417.458	6		5.63662	5.84558	5.49249	5.70885	407.95	5			89.2715	0.0850709	0.208956	0.036729		1.08507	0.0889966	1.03673	0.0375829
		SD		75.1213	81.1451	56.1621			0.723695	0.772077	0.736832	0.776946	57.1373				29.1396	0.0271486	0.127533	0.0211762		0.0271486	0.0293174	0.0211762	0.02209
		SEM		30.6682	33.1274	22.9281			0.323646	0.345283	0.329521	0.347461	25.5526				11.8962	0.0110834	0.0570346	0.00947027		0.0110834	0.0119688	0.00947027	0.00987894
	t-test			0.662196	0.64386	0.846041			0.0661989	0.06058	0.0815846	0.0774862	0.442224				0.0119145	0.0119831	0.711125	0.901755		0.0119831	0.0130169	0.901755	0.899902
		t-tests		Inner Diameter (µm)		HR (bpm)	Comments		Axial Length (mm)		Outer Curvature Length (mm)		HR (bpm)	Comments			Inner Diameter		Axial Length (mm)			Inner Diameter		Axial Length (mm)
				diastole	systole				diastole	systole	diastole	systole					∆id (µm)	εϑ	∆l (mm)	εz		idsys/iddia	Eϑϑ	lsys/ldia	Ezz
	M	Un-WT vs Un-KO		0.00194983	1.52945e-05	0.754064			0.00296089	0.000596119	0.00275333	0.00040804	0.754064				0.0513592	0.165596	0.623287	0.313047		0.165596	0.167834	0.313047	0.313756
		Un-WT vs Un-OLD		0.11275	0.349973	0.416121			0.0442193	0.0281403	0.0284174	0.0133816	0.485017				0.229829	0.18017	0.877795	0.647793		0.18017	0.181537	0.647793	0.650692
		Un-WT vs Tr-WT		0.0662727	0.00501465	0.882316			0.0301465	0.0155002	0.00479161	0.00102224	0.882316				0.626808	0.930644	0.455017	0.857916		0.930644	0.969647	0.857916	0.871252
		Un-KO vs Tr-KO		0.0617356	0.185759	0.845006			0.0072862	0.00134132	0.00637794	0.00119081	0.391561				0.0909137	0.0494282	0.626846	0.970768		0.0494282	0.0505918	0.970768	0.968282
	F	Un-WT vs Un-KO		0.0142065	0.00219997	0.985241			0.000252946	4.25664e-05	0.000460632	0.000376684	0.976811				0.0717787	0.148885	0.66641	0.913887		0.148885	0.150012	0.913887	0.904984
		Un-WT vs Un-OLD		0.00797111	0.0069422	0.320421			0.0181612	0.0139028	0.174803	0.0535265	0.6573				0.802786	0.74129	0.830954	0.903343		0.74129	0.741952	0.903343	0.884459
		Un-WT vs Tr-WT		0.0356031	0.199199	0.775179			0.644349	0.865799	0.331796	0.317103	0.775179				0.282636	0.159495	0.409053	0.331075		0.159495	0.150631	0.331075	0.336076
		Un-KO vs Tr-KO		0.0210476	0.0254072	0.78678			0.0824218	0.117735	0.122409	0.151404	0.617654				0.944282	0.766773	0.481136	0.236914		0.766773	0.774768	0.236914	0.237058
Un-WT		Test Dates	Mouse #	Long Axis B-Mode													Displacements & Linear Strains					Stretches & Green Strains
				Inner Diameter (µm)		HR (bpm)	Data File	Comments	Axial Length (mm)		Outer Curvature Length (mm)		HR (bpm)	Data File	Comments		Inner Diameter		Axial Length (mm)			Inner Diameter		Axial Length (mm)
				diastole	systole				diastole	systole	diastole	systole					∆id (µm)	εϑ	∆l (mm)	εz		idsys/iddia	Eϑϑ	lsys/ldia	Ezz
Female	LmnaG/G		P91						2.485	2.7825					-				0.2975	0.119718				1.11972	0.126885
			P92						2.165	2.401					-				0.236	0.109007				1.10901	0.114948
			P98	976.587	1037.81	432.5			3.233	3.685					-		61.2223	0.06269	0.452	0.139808		1.06269	0.0646551	1.13981	0.149581
			P110	941.341	1099.33	452.667			2.187	2.472					-		157.994	0.167839	0.285	0.130316		1.16784	0.181924	1.13032	0.138807
			P115						2.226	2.397					-				0.171	0.0768194				1.07682	0.07977
		mean		958.964	1068.57	442.583	2		2.4592	2.7475	#DIV/0!	#DIV/0!	#DIV/0!	5			109.608	0.115264	0.2883	0.115134		1.11526	0.123289	1.11513	0.121998
		SD		24.9229	43.5047	14.26			0.451237	0.547482	#DIV/0!	#DIV/0!	#DIV/0!				68.4276	0.0743514	0.104149	0.0243201		0.0743514	0.0829215	0.0243201	0.0269265
		SEM		17.6232	30.7625	10.0833			0.2018	0.244841	#DIV/0!	#DIV/0!	#DIV/0!				48.3856	0.0525744	0.0465767	0.0108763		0.0525744	0.0586344	0.0108763	0.0120419
	Lmna+/+	2018-12-07	P165						2.339	2.522									0.183	0.0782386				1.07824	0.0812992
		2018-12-07	P166						3.353	3.5815									0.2285	0.0681479				1.06815	0.07047
		2019-03-08	P1120						3.47	4.21									0.74	0.213256				1.21326	0.235996
			P1122						3.216	3.496									0.28	0.0870647				1.08706	0.0908548
		mean		#DIV/0!	#DIV/0!	#DIV/0!	0		3.0945	3.45238	#DIV/0!	#DIV/0!	#DIV/0!	4			#DIV/0!	#DIV/0!	0.357875	0.111677		#DIV/0!	#DIV/0!	1.11168	0.119655
		SD		#DIV/0!	#DIV/0!	#DIV/0!			0.514252	0.697178	#DIV/0!	#DIV/0!	#DIV/0!				#DIV/0!	#DIV/0!	0.257813	0.0681593		#DIV/0!	#DIV/0!	0.0681593	0.0780063
		SEM		#DIV/0!	#DIV/0!	#DIV/0!			0.257126	0.348589	#DIV/0!	#DIV/0!	#DIV/0!				#DIV/0!	#DIV/0!	0.128907	0.0340796		#DIV/0!	#DIV/0!	0.0340796	0.0390031
	t-test			#DIV/0!	#DIV/0!	#DIV/0!			0.0991547	0.152057	#DIV/0!	#DIV/0!	#DIV/0!				#DIV/0!	#DIV/0!	0.639858	0.928137		#DIV/0!	#DIV/0!	0.917961	0.951113
									3.13649	3.46364	3.07081	3.42032	432.5											1.10431	0.109746
									2.42666	2.67325	2.35091	2.67297	432.5											1.10162	0.106779
									3.29538	3.64094	3.26413	3.65091	432.5											1.10486	0.110361

## Sheet: Table with stats
				Fbln5+/+ M				Lmna+/+ F				LmnaG/G F									Fbln5+/+ M				Lmna+/+ F				LmnaG/G F
		Age (weeks)		21.058	±	0.24926		20.9286	±	0.291625		20.602	±	0.105328					n		10				3				4
		n		5				3				4							Blood Pressure (mmHg)
		Heart rate (bpm)		408.624	±	28.6698		428.686	±	13.7326		423.812	±	46					Diastolic		91.1926	±	6.63117		94.1061	±	3.58126		73.2577	±	6*
		Diastolic thickness (mm)																	Systolic		126.489	±	7.75654		125.791	±	4.05869		100.888	±	6**
		IVS		0.888434	±	0.064755		0.863823	±	0.0481223		0.607603	±	0.04**					Mean		102.861	±	6.93404		104.497	±	3.59689		82.1253	±	6**
		LW		0.813022	±	0.0770498		0.857808	±	0.0380991		0.725706	±	0.03*					Pulse		35.2969	±	1.39691		31.6434	±	1.47068		27.6302	±	2
		Internal Diameter (mm)
		Diastolic		3.92228	±	0.213255		3.61098	±	0.0953081		3.23262	±	0.11*
		Systolic		2.54856	±	0.160308		2.22711	±	0.108947		2.02852	±	0.1
		Volume (ul)																			Fbln5+/+ F				Lmna+/+ F				LmnaG/G F
		Diastolic		68.2642	±	8.65913		55.5189	±	3.30155		42.3509	±	3*					n		5				3				4
		Systolic		24.3208	±	3.74721		17.5233	±	1.99919		13.4696	±	2					PW Doppler
		SV (ul)		43.9434	±	4.99382		37.9956	±	1.86782		28.8813	±	2**					Systolic Blood Velocity (cm/s)
		CO (mL/min)		17.3847	±	0.853561		16.1399	±	0.559803		11.912	±	1***					ATA		106.743	±	12.5234		75.582	±	6.93857		54.5905	±	5.4*
		EF (%)		65.0781	±	1.21351		69.461	±	2.24228		68.6057	±	2					IAA		29.1166	±	12.5234		24.414	±	2.95245		22.7753	±	4.9
		FS (%)		35.2135	±	0.84751		38.6936	±	1.7517		37.365	±	1					Pulse Transit Time (ms)		12.3026	±	2.39324		13.1533	±	0.985605		6.44214	±	0.7***
		LV Mass (mg)		126.616	±	22.1732		96.4806	±	7.05524		52.365	±	2***					Aortic Length (mm)						42.7457	±	1.2933		37.5435	±	0.4**
		LV/Body Mass (mg/g)		4.21962	±	0.0964306		3.92849	±	0.307426		4.36544	±	0.2					M-Mode LAX
																			Systolic Inner diameter (um)
																			ATA		1518.64	±	44.0382		1480.04	±			1086.35	±	26.6525
		Filling Velocity (mm/s)																	IAA		596.706	±	25.7918		451.957	±			458.61	±	8.02804
		E Peak		683.568	±	87.3186		608.443	±	27.7724		630.774	±	47					Cyclic Linear Strain εϑ
		A Peak		472.987	±	64.7984		465.971	±			368.294	±	65					ATA		0.23278	±	0.0096154		0.249138	±			0.198377	±	0.017951
		E' Peak						18.05	±	2.50334		8.85759	±	0.43**					IAA		0.1504	±	0.0220125		0.169906	±			0.196037	±	0.0242651
		A' Peak						16.5131	±	3.93105		26.2144	±	5.8					Cyclic Green Strain Eϑϑ
		DT (ms)		29.7917	±	1.62516		28.7963	±	1.58222		25.8333	±	1.7					ATA		0.259965	±	0.0118209		0.280172	±			0.218698	±	0.0218707
		Velocity Ratios (-)																	IAA		0.162436	±	0.0257266		0.18434	±			0.21643	±	0.029547
		E/A		1.45289	±	0.0299805		1.60561	±			1.81183	±	0.14
		E'/A'		#DIV/0!	±	#DIV/0!		1.40548	±	0.333449		0.401271	±	0.08*
		E/E'						36.1542	±	4.07051		71.8271	±	6.3***

## Sheet: Table with stats M and F
				Wt				LmnaG609G				LmnaG609G + L				LmnaG609G + L + R
		Body mass (g)		25.5833	±	0.850653		13.375	±	1.14337		12.1667	±	0.691215		12	±	0.456435
		n		6				4				6				4
		Heart rate (bpm)		430.5	±	20.2266		405	±	49.0476		426.167	±	32		411.25	±	28
		Diastolic thickness (mm)
		IVS		0.734684	±	0.0331214		0.695552	±	0.028932		0.752893	±	0.06		0.67952	±	0.03
		LW		0.674088	±	0.0602592		0.685034	±	0.0513141		0.778242	±	0.02		0.586145	±	0.03
		Internal Diameter (mm)
		Diastolic		4.03615	±	0.0714247		3.35364	±	0.169513		3.29806	±	0.06		3.2028	±	0.19
		Systolic		2.61091	±	0.177112		1.92931	±	0.26462		1.90078	±	0.07		2.07663	±	0.12
		Volume (ul)
		Diastolic		71.7359	±	3.0006		46.4821	±	5.3839		44.2426	±	2		41.8046	±	6
		Systolic		25.8683	±	4.04224		12.8641	±	4.28703		11.3858	±	1		14.3001	±	2
		SV (ul)		45.8676	±	1.42305		33.618	±	3.17751		32.8568	±	1		27.5045	±	5
		CO (mL/min)		19.7604	±	1.08341		12.6365	±	1.18859		22.9253	±	5		9.8257	±	2
		EF (%)		64.7682	±	4.33094		74.0281	±	6.6833		74.4207	±	2		65.2022	±	4
		FS (%)		35.5832	±	3.36622		43.1174	±	5.51501		42.4155	±	2		34.9371	±	3
		LV Mass (mg)		80.9576	±	4.53877		58.634	±	7.98099		64.5356	±	4		47.7799	±	5
		LV/Body Mass (mg/g)		3.20302	±	0.265516		4.33318	±	0.277178		5.34098	±	0.3*		4.00834	±	0.5
		Filling Velocity (mm/s)
		E Peak		666.056	±	26.8865		619.697	±	98.9655		566.269	±	59		457.797	±	83
		A Peak		383.796	±	59.22		377.414	±	45.7142		299.655	±	42		222.368	±	44
		Septal e'		19.0792	±	1.53409		7.34163	±	1.3973		12.9072	±	1.43*		7.07766	±	1.11
		Septal a'		21.3191	±	0.935917		12.3417	±	1.87139		11.5703	±	0.6		9.08954	±	0.2
		DT (ms)		26.412	±	1.64352		31.5972	±	4.17187		25.5093	±	2.3		22.9861	±	2.8
		Velocity Ratios (-)
		E/A		2.03394	±	0.415698		1.63348	±	0.117972		1.95381	±	0.12		2.7921	±	1.31
		Septal e'/a'		0.914396	±	0.112948		0.595847	±	0.0722163		1.13991	±	0.15*		0.786795	±	0.14
		Average E/e'		41.9927	±	4.20773		80.9698	±	3.86248		43.4121	±	8.06**		51.2146	±	3.85**

## Sheet: Table with stats Lona treatment
				WT				GG				GG + L				GG + L + R
		n		6				4				6				4
		Heart rate (bpm)		430.5	±	20.2266		405	±	49.0476		426.167	±	32		411.25	±	28
		Diastolic thickness (mm)
		IVS		0.734684	±	0.0331214		0.695552	±	0.028932		0.752893	±	0.06		0.67952	±	0.12
		LW		0.674088	±	0.0602592		0.685034	±	0.0513141		0.778242	±	0.02		0.586145	±	0.09
		Internal Diameter (mm)
		Diastolic		4.03615	±	0.0714247		3.35364	±	0.169513		3.29806	±	0.06		3.2028	±	0.04
		Systolic		2.61091	±	0.177112		1.92931	±	0.26462		1.90078	±	0.07		2.07663	±	0.03
		Volume (ul)
		Diastolic		71.7359	±	3.0006		46.4821	±	5.3839		44.2426	±	2		41.8046	±	6
		Systolic		25.8683	±	4.04224		12.8641	±	4.28703		11.3858	±	1		14.3001	±	2
		SV (ul)		45.8676	±	1.42305		33.618	±	3.17751		32.8568	±	1		27.5045	±	5
		CO (mL/min)		19.7604	±	1.08341		12.6365	±	1.18859		22.9253	±	5		9.8257	±	2
		EF (%)		64.7682	±	4.33094		74.0281	±	6.6833		74.4207	±	2		65.2022	±	4
		FS (%)		35.5832	±	3.36622		43.1174	±	5.51501		42.4155	±	2		34.9371	±	3
		LV Mass (mg)		80.9576	±	4.53877		58.634	±	7.98099		64.5356	±	4		47.7799	±	5
		LV/Body Mass (mg/g)		3.20302	±	0.265516		4.33318	±	0.277178		5.34098	±	0.3*		4.00834	±	0.5
		Filling Velocity (mm/s)
		E Peak		666.056	±	26.8865		619.697	±	98.9655		566.269	±	59		457.797	±	83
		A Peak		383.796	±	59.22		377.414	±	45.7142		299.655	±	42		222.368	±	44
		Septal e'		19.0792	±	1.53409		7.34163	±	1.3973		12.9072	±	1.43*		7.07766	±	1.11
		Septal a'		21.3191	±	0.935917		12.3417	±	1.87139		11.5703	±	0.6		9.08954	±	0.2
		DT (ms)		26.412	±	1.64352		31.5972	±	4.17187		25.5093	±	2.3		22.9861	±	2.8
		Velocity Ratios (-)
		E/A		2.03394	±	0.415698		1.63348	±	0.117972		1.95381	±	0.12		2.7921	±	1.31
		Septal e'/a'		0.914396	±	0.112948		0.595847	±	0.0722163		1.13991	±	0.15*		0.786795	±	0.14
		Average E/e'		41.9927	±	4.20773		80.9698	±	3.86248		43.4121	±	8.06**		51.2146	±	3.85**

## Sheet: Table with stats F
		140 days		Ctrl F				LmnaG/G F
		LV function
		n		9				5
		Heart rate (bpm)		428.686	±	13.7326		423.812	±	46
		Diastolic thickness (mm)
		IVS		0.863823	±	0.0481223		0.607603	±	0.04**
		LW		0.857808	±	0.0380991		0.725706	±	0.03*
		Internal diameter (mm)
		Diastolic		3.61098	±	0.0953081		3.23262	±	0.11*
		Systolic		2.22711	±	0.108947		2.02852	±	0.1
		Volume (ul)
		Diastolic		55.5189	±	3.30155		42.3509	±	3*
		Systolic		17.5233	±	1.99919		13.4696	±	2
		SV (ul)		37.9956	±	1.86782		28.8813	±	2**
		CO (mL/min)		16.1399	±	0.559803		11.912	±	1***
		EF (%)		69.461	±	2.24228		68.6057	±	2
		FS (%)		38.6936	±	1.7517		37.365	±	1
		LV mass (mg)		96.4806	±	7.05524		52.365	±	2***
		Body mass (g)		24.7111	±	1.03245		12.02	±	0.2***
		LV mass/Body mass (mg/g)		3.92849	±	0.307426		4.36544	±	0.2
		Filling velocity (mm/s)
		n		6				5
		E Peak		608.443	±	27.7724		630.774	±	47
		A Peak		465.971	±	50.1456		368.294	±	65
		E' Peak		18.05	±	2.50334		8.85759	±	0.43**
		A' Peak		16.5131	±	3.93105		26.2144	±	5.8
		DT (ms)		28.7963	±	1.58222		25.8333	±	1.7
		Velocity ratios (-)
		E/A		1.60561	±	0.0835051		1.81183	±	0.14
		E'/A'		1.40548	±	0.333449		0.401271	±	0.08*
		E/E'		36.1542	±	4.07051		71.8271	±	6.3***
		PW Doppler
		n		6				5
		Systolic blood velocity (cm/s)
		ATA		75.582	±	6.93857		54.5905	±	5.4*
		IAA		24.414	±	2.95245		22.7753	±	4.9
		Pulse transit time (ms)		13.1533	±	0.985605		6.44214	±	0.7***
		Aortic length (mm)		42.7457	±	1.2933		37.5435	±	0.4**
		PWV (m/s)		3.32548	±	0.230548		6.15722	±	0.8***
		Blood pressure (mmHg)
		n		8				4
		Diastolic		94.1061	±	3.58126		73.2577	±	6*
		Systolic		125.791	±	4.05869		100.888	±	6**
		Mean		104.497	±	3.59689		82.1253	±	6**
		Pulse		31.6434	±	1.47068		27.6302	±	2

[truncated: 3 more sheets: Table, Millar Pressure, PV Loops]
